# Supplementary material for: Three-dimensional single-cell transcriptome imaging of thick tissues
Source: bioRxiv preprint, doi:10.1101/2023.07.21.550124, version 2 (2024-11-08)
Supplement: Supplemental Table 2 [file 550124_file03.xlsx]

## Sheet: Sheet1
gene_id	transcript_id	probes
1700022I11Rik	ENSMUST00000030163	CGCGGTGGTGGTACGACATGAAGAGTGAGTAGTAGTGGAGTGTTAAGAACTGGGGAGCTGGAAAATGAGTGAAGGGTGTGTTTGTAAAGGGTAGCGCAACTAGGACGGACAA
1700022I11Rik	ENSMUST00000030163	CGCGGTGGTGGTACGACATGAAGGAGGAGGGTAATGATAGAGGAGGCTTCTCTTTCTAGTACATTTCTGCAAAGAGTGAGTAGTAGTGGAGTAGCGCAACTAGGACGGACAA
1700022I11Rik	ENSMUST00000030163	CGCGGTGGTGGTACGACATGAAGAGTGAGTAGTAGTGGAGTTTTTGGAGTTCAGGCTGTGGGTACAGACCTATGGGAGGATTGAGATGAGTTAGCGCAACTAGGACGGACAA
1700022I11Rik	ENSMUST00000030163	CGCGGTGGTGGTACGACATGAAGGGTGTGTTTGTAAAGGGTGCTTCTGATCTAGGGACATCATCCACAGTAAAGGAGGAGGGTAATGATAGAAGCGCAACTAGGACGGACAA
1700022I11Rik	ENSMUST00000030163	CGCGGTGGTGGTACGACATGAAGGGTGTGTTTGTAAAGGGTTTCTGTGTAAACCACTGTGTGTGTACCTCTATGGGAGGATTGAGATGAGTTAGCGCAACTAGGACGGACAA
1700022I11Rik	ENSMUST00000030163	CGCGGTGGTGGTACGACATGAAGGAGGAGGGTAATGATAGATAGTAAGTTGAGGAGTGGTAACAGGGAAGCATGGGAGGATTGAGATGAGTTAGCGCAACTAGGACGGACAA
1700022I11Rik	ENSMUST00000030163	CGCGGTGGTGGTACGACATGAAGGGTGTGTTTGTAAAGGGTACTCTAATAAGATTCTTTGGGGGCCCATTAAAGAGTGAGTAGTAGTGGAGTAGCGCAACTAGGACGGACAA
1700022I11Rik	ENSMUST00000030163	CGCGGTGGTGGTACGACATGAAGAGTGAGTAGTAGTGGAGTACTCTCTGGCATTCTGTCAGGGAAATTGGGAAGGAGGAGGGTAATGATAGAAGCGCAACTAGGACGGACAA
1700022I11Rik	ENSMUST00000030163	CGCGGTGGTGGTACGACATGAAGAGTGAGTAGTAGTGGAGTGAGGCTTTTGGGTGTTCATTTTGTTTCATGATGGGAGGATTGAGATGAGTTAGCGCAACTAGGACGGACAA
1700022I11Rik	ENSMUST00000030163	CGCGGTGGTGGTACGACATGAAGGAGGAGGGTAATGATAGAGCCTCTTCCTCCAGACCTCAGATGAATATAAAGGGTGTGTTTGTAAAGGGTAGCGCAACTAGGACGGACAA
1700022I11Rik	ENSMUST00000030163	CGCGGTGGTGGTACGACATGATGGGAGGATTGAGATGAGTTTGAGATTGGAAGCTCATAGATCTGAAGGTTAAGGGTGTGTTTGTAAAGGGTAGCGCAACTAGGACGGACAA
1700022I11Rik	ENSMUST00000030163	CGCGGTGGTGGTACGACATGATGGGAGGATTGAGATGAGTTAACCTCGGCATAGAGGCCTCTGCTGGTCTGAAGGAGGAGGGTAATGATAGAAGCGCAACTAGGACGGACAA
1700022I11Rik	ENSMUST00000030163	CGCGGTGGTGGTACGACATGAAGAGTGAGTAGTAGTGGAGTCTGCTGTAGTTTGTTCAGTCTGAGCTTTAAAAGGGTGTGTTTGTAAAGGGTAGCGCAACTAGGACGGACAA
1700022I11Rik	ENSMUST00000030163	CGCGGTGGTGGTACGACATGAAGAGTGAGTAGTAGTGGAGTATCTGAGGGCTCTCCCATGCCTGAACAGTTAAGGAGGAGGGTAATGATAGAAGCGCAACTAGGACGGACAA
1700022I11Rik	ENSMUST00000030163	CGCGGTGGTGGTACGACATGATGGGAGGATTGAGATGAGTTTCTTTTTGCACTGTGGTTTGGCAGAGAGTTAAGAGTGAGTAGTAGTGGAGTAGCGCAACTAGGACGGACAA
1700022I11Rik	ENSMUST00000030163	CGCGGTGGTGGTACGACATGAAGGGTGTGTTTGTAAAGGGTAGCAAAGGCTTAAGATTGGAGGATACCAGTAAGGAGGAGGGTAATGATAGAAGCGCAACTAGGACGGACAA
1700022I11Rik	ENSMUST00000030163	CGCGGTGGTGGTACGACATGATGGGAGGATTGAGATGAGTTATGAGGAATCAGATGTCCACAGGTGTTTTTAAGGGTGTGTTTGTAAAGGGTAGCGCAACTAGGACGGACAA
1700022I11Rik	ENSMUST00000030163	CGCGGTGGTGGTACGACATGATGGGAGGATTGAGATGAGTTGATACAACAGAAAGGCAAAAGGCAATTCTGAAGGAGGAGGGTAATGATAGAAGCGCAACTAGGACGGACAA
1700022I11Rik	ENSMUST00000030163	CGCGGTGGTGGTACGACATGAAGAGTGAGTAGTAGTGGAGTTTAGTGGGTGATCCTAATCTTGCAGTCCTTAAGGGTGTGTTTGTAAAGGGTAGCGCAACTAGGACGGACAA
1700022I11Rik	ENSMUST00000030163	CGCGGTGGTGGTACGACATGAAGGAGGAGGGTAATGATAGAGTGCAGAAAGTCTTTCTTTGGGGTTAACATAAGAGTGAGTAGTAGTGGAGTAGCGCAACTAGGACGGACAA
1700022I11Rik	ENSMUST00000030163	CGCGGTGGTGGTACGACATGAAGAGTGAGTAGTAGTGGAGTGTTGTAGCCCCTTGCCTTGTGTCATTTTATATGGGAGGATTGAGATGAGTTAGCGCAACTAGGACGGACAA
1700022I11Rik	ENSMUST00000030163	CGCGGTGGTGGTACGACATGAAGGAGGAGGGTAATGATAGATTCACTTGAGACAGGTCTCCTGTGGGGTTGAAGGGTGTGTTTGTAAAGGGTAGCGCAACTAGGACGGACAA
1700022I11Rik	ENSMUST00000030163	CGCGGTGGTGGTACGACATGATGGGAGGATTGAGATGAGTTAGAAGAGGAGTGCAAGCAATGAGGGGCCTGAAGGGTGTGTTTGTAAAGGGTAGCGCAACTAGGACGGACAA
1700022I11Rik	ENSMUST00000030163	CGCGGTGGTGGTACGACATGATGGGAGGATTGAGATGAGTTCAGGCCTGGGCAGGATTGTTTTCCCTTGTGAAGGAGGAGGGTAATGATAGAAGCGCAACTAGGACGGACAA
1700022I11Rik	ENSMUST00000030163	CGCGGTGGTGGTACGACATGAAGGGTGTGTTTGTAAAGGGTCATTGGCCCAGGAATCCTTTGTCCACTCTGAAGAGTGAGTAGTAGTGGAGTAGCGCAACTAGGACGGACAA
1700022I11Rik	ENSMUST00000030163	CGCGGTGGTGGTACGACATGAAGAGTGAGTAGTAGTGGAGTGGCTAGGAGATGAAACTATGTCAGCATAGAAAGGAGGAGGGTAATGATAGAAGCGCAACTAGGACGGACAA
1700022I11Rik	ENSMUST00000030163	CGCGGTGGTGGTACGACATGATGGGAGGATTGAGATGAGTTAGTCACGGGTACTGTGAGTTGGCAAGGGGCAAGAGTGAGTAGTAGTGGAGTAGCGCAACTAGGACGGACAA
1700022I11Rik	ENSMUST00000030163	CGCGGTGGTGGTACGACATGAAGGAGGAGGGTAATGATAGATCTGCTCCTTTGTCTCCCATAAAGCTTTAGAAGGGTGTGTTTGTAAAGGGTAGCGCAACTAGGACGGACAA
1700022I11Rik	ENSMUST00000030163	CGCGGTGGTGGTACGACATGAAGGGTGTGTTTGTAAAGGGTCATTAGGGGGTCAGAAGCTTGGGGAATGCCATGGGAGGATTGAGATGAGTTAGCGCAACTAGGACGGACAA
1700022I11Rik	ENSMUST00000030163	CGCGGTGGTGGTACGACATGATGGGAGGATTGAGATGAGTTGGAGCCTCTTGTGATAAGGATGAGAGCTGCAAGGAGGAGGGTAATGATAGAAGCGCAACTAGGACGGACAA
1700022I11Rik	ENSMUST00000030163	CGCGGTGGTGGTACGACATGAAGAGTGAGTAGTAGTGGAGTAACAGAATTTGGAGATGGACTGCATTCCCAAAGGGTGTGTTTGTAAAGGGTAGCGCAACTAGGACGGACAA
1700022I11Rik	ENSMUST00000030163	CGCGGTGGTGGTACGACATGAAGAGTGAGTAGTAGTGGAGTGATTATGTTGATGGAGTCTGAGGTCCCCTGAAGGAGGAGGGTAATGATAGAAGCGCAACTAGGACGGACAA
1700022I11Rik	ENSMUST00000030163	CGCGGTGGTGGTACGACATGAAGAGTGAGTAGTAGTGGAGTTGTATCCCAGGTTTTCCCTGACATCCTTAGATGGGAGGATTGAGATGAGTTAGCGCAACTAGGACGGACAA
1700022I11Rik	ENSMUST00000030163	CGCGGTGGTGGTACGACATGAAGGAGGAGGGTAATGATAGAATGGTCAGACACCTCTGAGACGGCCTCTCCAAGGGTGTGTTTGTAAAGGGTAGCGCAACTAGGACGGACAA
1700022I11Rik	ENSMUST00000030163	CGCGGTGGTGGTACGACATGATGGGAGGATTGAGATGAGTTTCAGAGGCCCAGGGACTGCCTGAGGTTTCTAAGGGTGTGTTTGTAAAGGGTAGCGCAACTAGGACGGACAA
1700022I11Rik	ENSMUST00000030163	CGCGGTGGTGGTACGACATGATGGGAGGATTGAGATGAGTTGGTCTCCAGAAGGTTCACTTATGTGAAACTAAGGAGGAGGGTAATGATAGAAGCGCAACTAGGACGGACAA
1700022I11Rik	ENSMUST00000030163	CGCGGTGGTGGTACGACATGAAGAGTGAGTAGTAGTGGAGTGAGAAGCTGCTGAGCAAGGGCCGAATGTGGAAGGGTGTGTTTGTAAAGGGTAGCGCAACTAGGACGGACAA
1700022I11Rik	ENSMUST00000030163	CGCGGTGGTGGTACGACATGAAGAGTGAGTAGTAGTGGAGTCTCATCAGCCTTCACATGACCCAGCCCTGGAAGGAGGAGGGTAATGATAGAAGCGCAACTAGGACGGACAA
1700022I11Rik	ENSMUST00000030163	CGCGGTGGTGGTACGACATGATGGGAGGATTGAGATGAGTTCAGCCTCTTACTTTTCTGAGACCGCTGCTCAAGAGTGAGTAGTAGTGGAGTAGCGCAACTAGGACGGACAA
1700022I11Rik	ENSMUST00000030163	CGCGGTGGTGGTACGACATGAAGGGTGTGTTTGTAAAGGGTGTGTCAGGTATGATTCTCTTGTAGCCCTTAAAGGAGGAGGGTAATGATAGAAGCGCAACTAGGACGGACAA
1700022I11Rik	ENSMUST00000030163	CGCGGTGGTGGTACGACATGATGGGAGGATTGAGATGAGTTTGCTCTACCAGAAGCTTGTGCCTGAGGCTGAAGGGTGTGTTTGTAAAGGGTAGCGCAACTAGGACGGACAA
1700022I11Rik	ENSMUST00000030163	CGCGGTGGTGGTACGACATGAAGGAGGAGGGTAATGATAGAAGTGGGACACACATAGGTGTGGCTTCATAGATGGGAGGATTGAGATGAGTTAGCGCAACTAGGACGGACAA
1700022I11Rik	ENSMUST00000030163	CGCGGTGGTGGTACGACATGAAGGGTGTGTTTGTAAAGGGTAGTTGAGAACCGGGTGCTATTTCTTCCAGAAAGAGTGAGTAGTAGTGGAGTAGCGCAACTAGGACGGACAA
1700022I11Rik	ENSMUST00000030163	CGCGGTGGTGGTACGACATGAAGAGTGAGTAGTAGTGGAGTGGATGGGATTTGGACCATCGCCTTCCGTTTAAGGAGGAGGGTAATGATAGAAGCGCAACTAGGACGGACAA
1700022I11Rik	ENSMUST00000030163	CGCGGTGGTGGTACGACATGATGGGAGGATTGAGATGAGTTAAACCCACGTGGAAGTCCAGGGTTGGAGTTAAGAGTGAGTAGTAGTGGAGTAGCGCAACTAGGACGGACAA
1700022I11Rik	ENSMUST00000030163	CGCGGTGGTGGTACGACATGAAGGAGGAGGGTAATGATAGATCTACTCCACTGCCAGGCGTGGATCACAGGAAGGGTGTGTTTGTAAAGGGTAGCGCAACTAGGACGGACAA
1700022I11Rik	ENSMUST00000030163	CGCGGTGGTGGTACGACATGATGGGAGGATTGAGATGAGTTTCTATTTCCCTACCCACACCTGACTTGGTTAAGGGTGTGTTTGTAAAGGGTAGCGCAACTAGGACGGACAA
1700022I11Rik	ENSMUST00000030163	CGCGGTGGTGGTACGACATGATGGGAGGATTGAGATGAGTTTTGGCTTCTGAGAGGCCAGGCTGGATAGGCAAGGAGGAGGGTAATGATAGAAGCGCAACTAGGACGGACAA
1700022I11Rik	ENSMUST00000030163	CGCGGTGGTGGTACGACATGAAGGGTGTGTTTGTAAAGGGTAAGCAGGTGCTGGGATAGGCTCTGAGCTGGAAGAGTGAGTAGTAGTGGAGTAGCGCAACTAGGACGGACAA
1700022I11Rik	ENSMUST00000030163	CGCGGTGGTGGTACGACATGAAGAGTGAGTAGTAGTGGAGTTTCAGAAATGGCGGCTCAGAAGACGAACATAAGGAGGAGGGTAATGATAGAAGCGCAACTAGGACGGACAA
1700022I11Rik	ENSMUST00000030163	CGCGGTGGTGGTACGACATGAAGAGTGAGTAGTAGTGGAGTCAGACTGAGAGGATGCATCTGTTGGGAACAATGGGAGGATTGAGATGAGTTAGCGCAACTAGGACGGACAA
1700022I11Rik	ENSMUST00000030163	CGCGGTGGTGGTACGACATGAAGGAGGAGGGTAATGATAGAAAAGGGCAAGGATTCTGGGTCTCACCGGCCAAGGGTGTGTTTGTAAAGGGTAGCGCAACTAGGACGGACAA
1700022I11Rik	ENSMUST00000030163	CGCGGTGGTGGTACGACATGAAGGGTGTGTTTGTAAAGGGTGGGTTCTCTATGGGGCTAACTCTAAGGGGTATGGGAGGATTGAGATGAGTTAGCGCAACTAGGACGGACAA
1700022I11Rik	ENSMUST00000030163	CGCGGTGGTGGTACGACATGAAGGAGGAGGGTAATGATAGAGCTCAGTTTCAGAATGTGGCTCTTGTGACAATGGGAGGATTGAGATGAGTTAGCGCAACTAGGACGGACAA
1700022I11Rik	ENSMUST00000030163	CGCGGTGGTGGTACGACATGAAGGGTGTGTTTGTAAAGGGTTGGGGGATGACTACTTGAAGAGCAGGGGTGAAGAGTGAGTAGTAGTGGAGTAGCGCAACTAGGACGGACAA
1700022I11Rik	ENSMUST00000030163	CGCGGTGGTGGTACGACATGAAGAGTGAGTAGTAGTGGAGTGACAGGCAGGGCTTCTGCCCTTTGAACTTTAAGGAGGAGGGTAATGATAGAAGCGCAACTAGGACGGACAA
1700022I11Rik	ENSMUST00000030163	CGCGGTGGTGGTACGACATGATGGGAGGATTGAGATGAGTTATGTGCCCACACCAAGCTTTAGATTTAAGTAAGAGTGAGTAGTAGTGGAGTAGCGCAACTAGGACGGACAA
1700022I11Rik	ENSMUST00000030163	CGCGGTGGTGGTACGACATGAAGGGTGTGTTTGTAAAGGGTGGTATAGGAGGGGAAGGTGGAGATTGGACTAAGGAGGAGGGTAATGATAGAAGCGCAACTAGGACGGACAA
1700022I11Rik	ENSMUST00000030163	CGCGGTGGTGGTACGACATGAAGGGTGTGTTTGTAAAGGGTGAGGTCTATGCACACCCAGAAACTTATCTAATGGGAGGATTGAGATGAGTTAGCGCAACTAGGACGGACAA
1700022I11Rik	ENSMUST00000030163	CGCGGTGGTGGTACGACATGATGGGAGGATTGAGATGAGTTAGTGGGCTTGCAGTTGGCATTGCAGTTTCAAAGGAGGAGGGTAATGATAGAAGCGCAACTAGGACGGACAA
1700022I11Rik	ENSMUST00000030163	CGCGGTGGTGGTACGACATGAAGGGTGTGTTTGTAAAGGGTAACTGGGGATGCAGAAACACAATGGTTTTTAAGAGTGAGTAGTAGTGGAGTAGCGCAACTAGGACGGACAA
1700022I11Rik	ENSMUST00000030163	CGCGGTGGTGGTACGACATGAAGGAGGAGGGTAATGATAGATGCTTTGTTGGAATCCAAGGACAGCACTTAAAGAGTGAGTAGTAGTGGAGTAGCGCAACTAGGACGGACAA
1700022I11Rik	ENSMUST00000030163	CGCGGTGGTGGTACGACATGAAGAGTGAGTAGTAGTGGAGTTTGTCTCTTACCAGAGACCAGAAGCCCTGTATGGGAGGATTGAGATGAGTTAGCGCAACTAGGACGGACAA
1700022I11Rik	ENSMUST00000030163	CGCGGTGGTGGTACGACATGAAGGGTGTGTTTGTAAAGGGTGAGCAGAGAAAAAGCTGGAGCCTGGCAGTTAAGGAGGAGGGTAATGATAGAAGCGCAACTAGGACGGACAA
1700022I11Rik	ENSMUST00000030163	CGCGGTGGTGGTACGACATGATGGGAGGATTGAGATGAGTTGAGCTCAGAGGCCAAGAAGTTATTTTTTCTAAGGGTGTGTTTGTAAAGGGTAGCGCAACTAGGACGGACAA
1700022I11Rik	ENSMUST00000030163	CGCGGTGGTGGTACGACATGATGGGAGGATTGAGATGAGTTATATCCAGGGGGAGTTCCTGGAGGGCCAGTAAGGAGGAGGGTAATGATAGAAGCGCAACTAGGACGGACAA
1700022I11Rik	ENSMUST00000030163	CGCGGTGGTGGTACGACATGAAGGGTGTGTTTGTAAAGGGTCCACATTTCTCTGCTTTGGACTTTCTGGAAAAGAGTGAGTAGTAGTGGAGTAGCGCAACTAGGACGGACAA
1700022I11Rik	ENSMUST00000030163	CGCGGTGGTGGTACGACATGAAGGAGGAGGGTAATGATAGATAAAGGGGGCTAGAGGTGTTTTATGGGGACAAGAGTGAGTAGTAGTGGAGTAGCGCAACTAGGACGGACAA
1700022I11Rik	ENSMUST00000030163	CGCGGTGGTGGTACGACATGAAGAGTGAGTAGTAGTGGAGTTTTATATGCTAGGATGCCCCACTGAGCTTCATGGGAGGATTGAGATGAGTTAGCGCAACTAGGACGGACAA
1700022I11Rik	ENSMUST00000030163	CGCGGTGGTGGTACGACATGAAGGAGGAGGGTAATGATAGAGGAACTCTGAGCTTTATGCTCAAACTTTCTAAGGGTGTGTTTGTAAAGGGTAGCGCAACTAGGACGGACAA
1700022I11Rik	ENSMUST00000030163	CGCGGTGGTGGTACGACATGATGGGAGGATTGAGATGAGTTGTCAGATAAGACTCCTTCGGGGCTGGGTTCAAGGGTGTGTTTGTAAAGGGTAGCGCAACTAGGACGGACAA
1700022I11Rik	ENSMUST00000030163	CGCGGTGGTGGTACGACATGAAGGAGGAGGGTAATGATAGACAGAGAACCTGATGGGTGACAGGAAGCTGGATGGGAGGATTGAGATGAGTTAGCGCAACTAGGACGGACAA
1700022I11Rik	ENSMUST00000030163	CGCGGTGGTGGTACGACATGAAGGGTGTGTTTGTAAAGGGTCTCCCTCTCTTTTGGGTTGAAAGTAGTACTAAGAGTGAGTAGTAGTGGAGTAGCGCAACTAGGACGGACAA
1700022I11Rik	ENSMUST00000030163	CGCGGTGGTGGTACGACATGAAGAGTGAGTAGTAGTGGAGTATGTGAACCTGGGGATTTGAAAGTGGGGCTAAGGAGGAGGGTAATGATAGAAGCGCAACTAGGACGGACAA
1700022I11Rik	ENSMUST00000030163	CGCGGTGGTGGTACGACATGAAGAGTGAGTAGTAGTGGAGTCCATACTTTACGGACTGGATTTAGTTGGCAATGGGAGGATTGAGATGAGTTAGCGCAACTAGGACGGACAA
1700022I11Rik	ENSMUST00000030163	CGCGGTGGTGGTACGACATGAAGGGTGTGTTTGTAAAGGGTTGATTCTCAGAGACAGAAGGAACCTCTTTGAAGGAGGAGGGTAATGATAGAAGCGCAACTAGGACGGACAA
1700022I11Rik	ENSMUST00000030163	CGCGGTGGTGGTACGACATGAAGGGTGTGTTTGTAAAGGGTCCATCCTCTGGGGGATTCTCTCTCTGGTAGATGGGAGGATTGAGATGAGTTAGCGCAACTAGGACGGACAA
1700022I11Rik	ENSMUST00000030163	CGCGGTGGTGGTACGACATGATGGGAGGATTGAGATGAGTTTGCTGTACAAGAGCTGGCGATGGGTTGAGGAAGGAGGAGGGTAATGATAGAAGCGCAACTAGGACGGACAA
1700022I11Rik	ENSMUST00000030163	CGCGGTGGTGGTACGACATGAAGAGTGAGTAGTAGTGGAGTTCTGACAGGGTGTCTAGAGGAGGGGATGGCAAGGGTGTGTTTGTAAAGGGTAGCGCAACTAGGACGGACAA
1700022I11Rik	ENSMUST00000030163	CGCGGTGGTGGTACGACATGAAGAGTGAGTAGTAGTGGAGTAGGATTCACTGCTGGAGGATTGGGGCCCTGAAGGAGGAGGGTAATGATAGAAGCGCAACTAGGACGGACAA
1700022I11Rik	ENSMUST00000030163	CGCGGTGGTGGTACGACATGAAGAGTGAGTAGTAGTGGAGTTCTTCCAAAATATGGGCTTCAGGGGTAGGAATGGGAGGATTGAGATGAGTTAGCGCAACTAGGACGGACAA
1700022I11Rik	ENSMUST00000030163	CGCGGTGGTGGTACGACATGAAGGGTGTGTTTGTAAAGGGTTGGGTTATGGGATACTGGGTGCCAATATTAAAGGAGGAGGGTAATGATAGAAGCGCAACTAGGACGGACAA
1700022I11Rik	ENSMUST00000030163	CGCGGTGGTGGTACGACATGAAGGGTGTGTTTGTAAAGGGTCTACTGACTCCTTAGGCGTACAGTTGCACTATGGGAGGATTGAGATGAGTTAGCGCAACTAGGACGGACAA
1700022I11Rik	ENSMUST00000030163	CGCGGTGGTGGTACGACATGAAGGAGGAGGGTAATGATAGAAGCAGGTTGTACGCAGGTGGAAAGGGGACTATGGGAGGATTGAGATGAGTTAGCGCAACTAGGACGGACAA
1700022I11Rik	ENSMUST00000030163	CGCGGTGGTGGTACGACATGAAGAGTGAGTAGTAGTGGAGTTCAAACCTATCTAGGACTTCCTGAGGGTTAAAGGGTGTGTTTGTAAAGGGTAGCGCAACTAGGACGGACAA
1700022I11Rik	ENSMUST00000030163	CGCGGTGGTGGTACGACATGAAGAGTGAGTAGTAGTGGAGTCTGGAGACTTAGAAACATGTGGGTGCTCTCAAGGAGGAGGGTAATGATAGAAGCGCAACTAGGACGGACAA
1700022I11Rik	ENSMUST00000030163	CGCGGTGGTGGTACGACATGATGGGAGGATTGAGATGAGTTTTGCATTCCCATTGAGGCTTAAATCCAGACAAGAGTGAGTAGTAGTGGAGTAGCGCAACTAGGACGGACAA
1700022I11Rik	ENSMUST00000030163	CGCGGTGGTGGTACGACATGAAGGGTGTGTTTGTAAAGGGTATTCTTCATGAACCCTCCAGCAGGCTCAACAAGGAGGAGGGTAATGATAGAAGCGCAACTAGGACGGACAA
1700022I11Rik	ENSMUST00000030163	CGCGGTGGTGGTACGACATGATGGGAGGATTGAGATGAGTTTTGCAAAGTCTGGCAGAGAGACAGAGGGAAAAGGGTGTGTTTGTAAAGGGTAGCGCAACTAGGACGGACAA
1700022I11Rik	ENSMUST00000030163	CGCGGTGGTGGTACGACATGAAGGAGGAGGGTAATGATAGATTCTTTGTGTTGTCAGTATTCTTCCCTGTGATGGGAGGATTGAGATGAGTTAGCGCAACTAGGACGGACAA
1700022I11Rik	ENSMUST00000030163	CGCGGTGGTGGTACGACATGAAGAGTGAGTAGTAGTGGAGTAGAGGAAGGTCCCCAAGATTCTAGAGTTAGAAGGGTGTGTTTGTAAAGGGTAGCGCAACTAGGACGGACAA
1700022I11Rik	ENSMUST00000030163	CGCGGTGGTGGTACGACATGAAGGAGGAGGGTAATGATAGAGGTGTACCCTTCAGTTGAGCCTCAGATCCCAAGAGTGAGTAGTAGTGGAGTAGCGCAACTAGGACGGACAA
1810046K07Rik	ENSMUST00000039959	CGCGGTGGTGGTACGACATGAGGGTTGATTAGTGGTAGAAACAGGCCATACTGCCATCTTCTTTTGTCCAAATGAAAGGAATGGGTTGTGGTAGCGCAACTAGGACGGACAA
1810046K07Rik	ENSMUST00000039959	CGCGGTGGTGGTACGACATGATGAAAGGAATGGGTTGTGGTTGGAGGTGAGGTAGGGTACCCTGGTGTGTGATGTGGAGGGATTGAAGGATAAGCGCAACTAGGACGGACAA
1810046K07Rik	ENSMUST00000039959	CGCGGTGGTGGTACGACATGAAGTTGAGGTGGGAGAGTATTCAACTGGTGCTGGGTGGCAAACTCTGCAGGATGAAAGGAATGGGTTGTGGTAGCGCAACTAGGACGGACAA
1810046K07Rik	ENSMUST00000039959	CGCGGTGGTGGTACGACATGAGGGTTGATTAGTGGTAGAAAGTGCTGGGTGCTGCTTCCTGACTCCAGTTGATGTGGAGGGATTGAAGGATAAGCGCAACTAGGACGGACAA
1810046K07Rik	ENSMUST00000039959	CGCGGTGGTGGTACGACATGAGGGTTGATTAGTGGTAGAAATCGAGGTGCTGAACAGGGAACTGGGTGTGGAAGTTGAGGTGGGAGAGTATTAGCGCAACTAGGACGGACAA
1810046K07Rik	ENSMUST00000039959	CGCGGTGGTGGTACGACATGAAGTTGAGGTGGGAGAGTATTTGGGGTCTGGCTGGCTGAGACCATCTGGTAATGTGGAGGGATTGAAGGATAAGCGCAACTAGGACGGACAA
1810046K07Rik	ENSMUST00000039959	CGCGGTGGTGGTACGACATGATGAAAGGAATGGGTTGTGGTCCAACTTCTCTATAAGGATGCAGAAGTCCTAGGGTTGATTAGTGGTAGAAAAGCGCAACTAGGACGGACAA
1810046K07Rik	ENSMUST00000039959	CGCGGTGGTGGTACGACATGATGAAAGGAATGGGTTGTGGTATCTCCTGACACCATAGTAACCTGACATCAATGTGGAGGGATTGAAGGATAAGCGCAACTAGGACGGACAA
1810046K07Rik	ENSMUST00000039959	CGCGGTGGTGGTACGACATGAAGTTGAGGTGGGAGAGTATTTCCGGCACTCATAAGAGCCCCAGGCCATACATGAAAGGAATGGGTTGTGGTAGCGCAACTAGGACGGACAA
1810046K07Rik	ENSMUST00000039959	CGCGGTGGTGGTACGACATGATGTGGAGGGATTGAAGGATATGGCATCTGGATGAACGGAGGCTGGGAGGAAGGGTTGATTAGTGGTAGAAAAGCGCAACTAGGACGGACAA
1810046K07Rik	ENSMUST00000039959	CGCGGTGGTGGTACGACATGAGGGTTGATTAGTGGTAGAAACCATCTGGTACCGTCTGTTCCCAGGAGTCTAAGTTGAGGTGGGAGAGTATTAGCGCAACTAGGACGGACAA
1810046K07Rik	ENSMUST00000039959	CGCGGTGGTGGTACGACATGAAGTTGAGGTGGGAGAGTATTGCACTGACAGAATTGTGGCTTAAACTGAAAATGTGGAGGGATTGAAGGATAAGCGCAACTAGGACGGACAA
1810046K07Rik	ENSMUST00000039959	CGCGGTGGTGGTACGACATGATGAAAGGAATGGGTTGTGGTTGAGAAATGTCCTTAGGGAGGGGTCCTGAAAGGGTTGATTAGTGGTAGAAAAGCGCAACTAGGACGGACAA
1810046K07Rik	ENSMUST00000039959	CGCGGTGGTGGTACGACATGATGAAAGGAATGGGTTGTGGTTTTTGTCCAAGGTGAAGGATCATGAAGAGAATGTGGAGGGATTGAAGGATAAGCGCAACTAGGACGGACAA
1810046K07Rik	ENSMUST00000039959	CGCGGTGGTGGTACGACATGATGAAAGGAATGGGTTGTGGTATGAAAGACGTGAAGGGGTATGGAGGTGAGAAGTTGAGGTGGGAGAGTATTAGCGCAACTAGGACGGACAA
1810046K07Rik	ENSMUST00000039959	CGCGGTGGTGGTACGACATGAGGGTTGATTAGTGGTAGAAAATTCCAGCAGGCCTGTGTGACTCTGCCCAGATGTGGAGGGATTGAAGGATAAGCGCAACTAGGACGGACAA
1810046K07Rik	ENSMUST00000039959	CGCGGTGGTGGTACGACATGAGGGTTGATTAGTGGTAGAAAATCTTTGACTGTGTGCTTCACTCTCACACCAAGTTGAGGTGGGAGAGTATTAGCGCAACTAGGACGGACAA
1810046K07Rik	ENSMUST00000039959	CGCGGTGGTGGTACGACATGAAGTTGAGGTGGGAGAGTATTGTTCAGCCTGGTCCTGTGTGAAGGAAGCCTATGTGGAGGGATTGAAGGATAAGCGCAACTAGGACGGACAA
1810046K07Rik	ENSMUST00000039959	CGCGGTGGTGGTACGACATGATGAAAGGAATGGGTTGTGGTGTGCCACAGTGCCAGGCCTCTGAGAAATGTAGGGTTGATTAGTGGTAGAAAAGCGCAACTAGGACGGACAA
1810046K07Rik	ENSMUST00000039959	CGCGGTGGTGGTACGACATGATGTGGAGGGATTGAAGGATAGTGCAGATCTTCCAGTGCATGCAGCGAGTAATGAAAGGAATGGGTTGTGGTAGCGCAACTAGGACGGACAA
1810046K07Rik	ENSMUST00000039959	CGCGGTGGTGGTACGACATGAAGTTGAGGTGGGAGAGTATTCTAAAGACGAAATGAGTTGGGTCACTGGGGATGAAAGGAATGGGTTGTGGTAGCGCAACTAGGACGGACAA
1810046K07Rik	ENSMUST00000039959	CGCGGTGGTGGTACGACATGATGTGGAGGGATTGAAGGATATGTAGTGTTTTGTAGGGGTTTTACAGTGGAAGGGTTGATTAGTGGTAGAAAAGCGCAACTAGGACGGACAA
1810046K07Rik	ENSMUST00000039959	CGCGGTGGTGGTACGACATGAGGGTTGATTAGTGGTAGAAAGGGTCCTGAACTCTTGGTTAGTTCAGCCTGAAGTTGAGGTGGGAGAGTATTAGCGCAACTAGGACGGACAA
1810046K07Rik	ENSMUST00000039959	CGCGGTGGTGGTACGACATGATGTGGAGGGATTGAAGGATAGCCAGGCCTCTGAGAAATGTCCTTAGGGAGAAGTTGAGGTGGGAGAGTATTAGCGCAACTAGGACGGACAA
1810046K07Rik	ENSMUST00000039959	CGCGGTGGTGGTACGACATGATGAAAGGAATGGGTTGTGGTTCCTAAAGCTCTAAGGTGGCCTCCTTGTGAAGGGTTGATTAGTGGTAGAAAAGCGCAACTAGGACGGACAA
1810046K07Rik	ENSMUST00000039959	CGCGGTGGTGGTACGACATGATGTGGAGGGATTGAAGGATAAGCGAGTAGGACTGAGCCCCAGCAAGGGATATGAAAGGAATGGGTTGTGGTAGCGCAACTAGGACGGACAA
1810046K07Rik	ENSMUST00000039959	CGCGGTGGTGGTACGACATGAAGTTGAGGTGGGAGAGTATTGTGGACTCGCAGGCAAAGGGCTTGCTCATGATGAAAGGAATGGGTTGTGGTAGCGCAACTAGGACGGACAA
1810046K07Rik	ENSMUST00000039959	CGCGGTGGTGGTACGACATGATGTGGAGGGATTGAAGGATAGCCTGCTTCTCAGTAAGCTCTCCGGCACTCAGGGTTGATTAGTGGTAGAAAAGCGCAACTAGGACGGACAA
1810046K07Rik	ENSMUST00000039959	CGCGGTGGTGGTACGACATGAGGGTTGATTAGTGGTAGAAAATAAGAGCCCCAGGCCATACTGCCATCTTCAAGTTGAGGTGGGAGAGTATTAGCGCAACTAGGACGGACAA
1810046K07Rik	ENSMUST00000039959	CGCGGTGGTGGTACGACATGATGTGGAGGGATTGAAGGATAAAGGATGCAGAAGTCCTCTGGCCTGCTTCTAAGTTGAGGTGGGAGAGTATTAGCGCAACTAGGACGGACAA
1810046K07Rik	ENSMUST00000039959	CGCGGTGGTGGTACGACATGATGAAAGGAATGGGTTGTGGTCTGCCAGGAGATCTTTGACTGTGTGCTTCAAGGGTTGATTAGTGGTAGAAAAGCGCAACTAGGACGGACAA
1810046K07Rik	ENSMUST00000039959	CGCGGTGGTGGTACGACATGATGTGGAGGGATTGAAGGATATCCAGTGCATGCAGCGAGTAGGACTGAGCCATGAAAGGAATGGGTTGTGGTAGCGCAACTAGGACGGACAA
1810046K07Rik	ENSMUST00000039959	CGCGGTGGTGGTACGACATGATGAAAGGAATGGGTTGTGGTTGGTGTTACTTGTCTGCCTGGATCGCTTTTAAGTTGAGGTGGGAGAGTATTAGCGCAACTAGGACGGACAA
1810046K07Rik	ENSMUST00000039959	CGCGGTGGTGGTACGACATGATGTGGAGGGATTGAAGGATACCATGTTCCTGTGCTGGGTGCTGCTTCCTGAGGGTTGATTAGTGGTAGAAAAGCGCAACTAGGACGGACAA
1810046K07Rik	ENSMUST00000039959	CGCGGTGGTGGTACGACATGAGGGTTGATTAGTGGTAGAAAAGGTGTAGAGGTCATTCGAGAACTGTTTGCAAGTTGAGGTGGGAGAGTATTAGCGCAACTAGGACGGACAA
1810046K07Rik	ENSMUST00000039959	CGCGGTGGTGGTACGACATGATGTGGAGGGATTGAAGGATACTGGTACACGCGTTTGCTGTAATCTCGCTGAAGTTGAGGTGGGAGAGTATTAGCGCAACTAGGACGGACAA
1810046K07Rik	ENSMUST00000039959	CGCGGTGGTGGTACGACATGAGGGTTGATTAGTGGTAGAAAGGAGGTCATTTGACACTGTCATGAAAGACGATGAAAGGAATGGGTTGTGGTAGCGCAACTAGGACGGACAA
1810046K07Rik	ENSMUST00000039959	CGCGGTGGTGGTACGACATGATGTGGAGGGATTGAAGGATAAGGTTGTCTCATTAGGATGTGATCCACAAAATGAAAGGAATGGGTTGTGGTAGCGCAACTAGGACGGACAA
1810046K07Rik	ENSMUST00000039959	CGCGGTGGTGGTACGACATGATGAAAGGAATGGGTTGTGGTTGACACTGTCATGAAAGACGTGAAGGGGTAAAGTTGAGGTGGGAGAGTATTAGCGCAACTAGGACGGACAA
1810046K07Rik	ENSMUST00000039959	CGCGGTGGTGGTACGACATGATGTGGAGGGATTGAAGGATACTGCTTCCTGACTCCAGTTGGGAGAGGCAAAGGGTTGATTAGTGGTAGAAAAGCGCAACTAGGACGGACAA
1810046K07Rik	ENSMUST00000039959	CGCGGTGGTGGTACGACATGAGGGTTGATTAGTGGTAGAAAGGTGAAGGATCATGAAGAGAAGAGACATCTAAGTTGAGGTGGGAGAGTATTAGCGCAACTAGGACGGACAA
1810046K07Rik	ENSMUST00000039959	CGCGGTGGTGGTACGACATGAAGTTGAGGTGGGAGAGTATTACTCCAGTTGGGAGAGGCAACTGGTGCTGGATGTGGAGGGATTGAAGGATAAGCGCAACTAGGACGGACAA
1810046K07Rik	ENSMUST00000039959	CGCGGTGGTGGTACGACATGATGAAAGGAATGGGTTGTGGTCCGTCTGTTCCCAGGAGTCTCTAAAGACGAAGGGTTGATTAGTGGTAGAAAAGCGCAACTAGGACGGACAA
1810046K07Rik	ENSMUST00000039959	CGCGGTGGTGGTACGACATGATGAAAGGAATGGGTTGTGGTGAAAACTCTGTGGACACAGAGTCCAACTTCATGTGGAGGGATTGAAGGATAAGCGCAACTAGGACGGACAA
1810046K07Rik	ENSMUST00000039959	CGCGGTGGTGGTACGACATGAAGTTGAGGTGGGAGAGTATTTGCCATCTTCTTTTGTCCAAGGTGAAGGATATGAAAGGAATGGGTTGTGGTAGCGCAACTAGGACGGACAA
1810046K07Rik	ENSMUST00000039959	CGCGGTGGTGGTACGACATGATGTGGAGGGATTGAAGGATACCATTGAGTCTGGTGTTACTTGTCTGCCTGAGGGTTGATTAGTGGTAGAAAAGCGCAACTAGGACGGACAA
1810046K07Rik	ENSMUST00000039959	CGCGGTGGTGGTACGACATGAAGTTGAGGTGGGAGAGTATTCTCTCACACCCTGGTACACGCGTTTGCTGTAGGGTTGATTAGTGGTAGAAAAGCGCAACTAGGACGGACAA
1810046K07Rik	ENSMUST00000039959	CGCGGTGGTGGTACGACATGATGTGGAGGGATTGAAGGATAATAGGGCTCAGCCAGGTAGGATTCCAGCAGAAGTTGAGGTGGGAGAGTATTAGCGCAACTAGGACGGACAA
1810046K07Rik	ENSMUST00000039959	CGCGGTGGTGGTACGACATGATGAAAGGAATGGGTTGTGGTCCAGGAGTCTCTAAAGACGAAATGAGTTGGAGGGTTGATTAGTGGTAGAAAAGCGCAACTAGGACGGACAA
1810046K07Rik	ENSMUST00000039959	CGCGGTGGTGGTACGACATGATGTGGAGGGATTGAAGGATATGCTATGGAAGTCGGAATCGGACAGGAAGGATGAAAGGAATGGGTTGTGGTAGCGCAACTAGGACGGACAA
1810046K07Rik	ENSMUST00000039959	CGCGGTGGTGGTACGACATGAAGTTGAGGTGGGAGAGTATTGGTAGTCTCCATAGGGCTCAGCCAGGTAGGATGAAAGGAATGGGTTGTGGTAGCGCAACTAGGACGGACAA
1810046K07Rik	ENSMUST00000039959	CGCGGTGGTGGTACGACATGATGTGGAGGGATTGAAGGATAGGTGGCAGAGTCGAGGTGCTGAACAGGGAAAGGGTTGATTAGTGGTAGAAAAGCGCAACTAGGACGGACAA
1810046K07Rik	ENSMUST00000039959	CGCGGTGGTGGTACGACATGAGGGTTGATTAGTGGTAGAAACTGGTGTGTGGTGCAGATCTTCCAGTGCATAAGTTGAGGTGGGAGAGTATTAGCGCAACTAGGACGGACAA
1810046K07Rik	ENSMUST00000039959	CGCGGTGGTGGTACGACATGAAGTTGAGGTGGGAGAGTATTGTAGGGTACCCTGGTGTGTGGTGCAGATCTATGTGGAGGGATTGAAGGATAAGCGCAACTAGGACGGACAA
1810046K07Rik	ENSMUST00000039959	CGCGGTGGTGGTACGACATGATGAAAGGAATGGGTTGTGGTATGAACGGAGGCTGGGAGGAGCTGACACTGAGGGTTGATTAGTGGTAGAAAAGCGCAACTAGGACGGACAA
1810046K07Rik	ENSMUST00000039959	CGCGGTGGTGGTACGACATGATGTGGAGGGATTGAAGGATACTAAGGTGGCCTCCTTGTGAAGGTTGTCTCATGAAAGGAATGGGTTGTGGTAGCGCAACTAGGACGGACAA
1810046K07Rik	ENSMUST00000039959	CGCGGTGGTGGTACGACATGAAGTTGAGGTGGGAGAGTATTCGTTTGCTGTAATCTCGCTGTCCATCCTGGATGAAAGGAATGGGTTGTGGTAGCGCAACTAGGACGGACAA
1810046K07Rik	ENSMUST00000039959	CGCGGTGGTGGTACGACATGATGTGGAGGGATTGAAGGATACAAACTCTGCAGGGCATCAGCAGGCATGGGAGGGTTGATTAGTGGTAGAAAAGCGCAACTAGGACGGACAA
1810046K07Rik	ENSMUST00000039959	CGCGGTGGTGGTACGACATGAAGTTGAGGTGGGAGAGTATTAAGAACAGGGATGAGTACTGTTGTCAACTAAGGGTTGATTAGTGGTAGAAAAGCGCAACTAGGACGGACAA
1810046K07Rik	ENSMUST00000039959	CGCGGTGGTGGTACGACATGAAGTTGAGGTGGGAGAGTATTCTGGCTGAGACCATCTGGTACCGTCTGTTCATGTGGAGGGATTGAAGGATAAGCGCAACTAGGACGGACAA
1810046K07Rik	ENSMUST00000039959	CGCGGTGGTGGTACGACATGAGGGTTGATTAGTGGTAGAAATGAATGAGCAAGCACACCTAGAAAACTCTGATGAAAGGAATGGGTTGTGGTAGCGCAACTAGGACGGACAA
1810046K07Rik	ENSMUST00000039959	CGCGGTGGTGGTACGACATGATGTGGAGGGATTGAAGGATAAATGAGTTGGGTCACTGGGGAACGGAGGCGATGAAAGGAATGGGTTGTGGTAGCGCAACTAGGACGGACAA
1810046K07Rik	ENSMUST00000039959	CGCGGTGGTGGTACGACATGATGAAAGGAATGGGTTGTGGTAAAGGGCTTGCTCATGCCGGAGGTGTAGAGAAGTTGAGGTGGGAGAGTATTAGCGCAACTAGGACGGACAA
1810046K07Rik	ENSMUST00000039959	CGCGGTGGTGGTACGACATGATGTGGAGGGATTGAAGGATAAATCTCGCTGTCCATCCTGGGTGGTGCCACAGGGTTGATTAGTGGTAGAAAAGCGCAACTAGGACGGACAA
1810046K07Rik	ENSMUST00000039959	CGCGGTGGTGGTACGACATGAGGGTTGATTAGTGGTAGAAAGGGTTTTACAGTGGATAAGAACAGGGATGAAAGTTGAGGTGGGAGAGTATTAGCGCAACTAGGACGGACAA
1810046K07Rik	ENSMUST00000039959	CGCGGTGGTGGTACGACATGATGTGGAGGGATTGAAGGATACTCTTGGTTAGTTCAGCCTGGTCCTGTGTGAAGTTGAGGTGGGAGAGTATTAGCGCAACTAGGACGGACAA
1810046K07Rik	ENSMUST00000039959	CGCGGTGGTGGTACGACATGATGAAAGGAATGGGTTGTGGTGTCGGAATCGGACAGGAAGGATCTCCTGACAGGGTTGATTAGTGGTAGAAAAGCGCAACTAGGACGGACAA
1810046K07Rik	ENSMUST00000039959	CGCGGTGGTGGTACGACATGATGAAAGGAATGGGTTGTGGTAGACATCTGACCCTTCCTCTGGGGAGAGGGATGTGGAGGGATTGAAGGATAAGCGCAACTAGGACGGACAA
1810046K07Rik	ENSMUST00000039959	CGCGGTGGTGGTACGACATGAAGTTGAGGTGGGAGAGTATTGCCAGGTAGGATTCCAGCAGGCCTGTGTGAATGAAAGGAATGGGTTGTGGTAGCGCAACTAGGACGGACAA
1810046K07Rik	ENSMUST00000039959	CGCGGTGGTGGTACGACATGATGTGGAGGGATTGAAGGATAGCTGACACTGCCATTGAGTCTGGTGTTACTAGGGTTGATTAGTGGTAGAAAAGCGCAACTAGGACGGACAA
1810046K07Rik	ENSMUST00000039959	CGCGGTGGTGGTACGACATGAAGTTGAGGTGGGAGAGTATTGTCATTCGAGAACTGTTTGCTGCTATGGAAAGGGTTGATTAGTGGTAGAAAAGCGCAACTAGGACGGACAA
1810046K07Rik	ENSMUST00000039959	CGCGGTGGTGGTACGACATGATGTGGAGGGATTGAAGGATAGCTGGGAGGAGCTGACACTGCCATTGAGTCAAGTTGAGGTGGGAGAGTATTAGCGCAACTAGGACGGACAA
1810046K07Rik	ENSMUST00000039959	CGCGGTGGTGGTACGACATGATGAAAGGAATGGGTTGTGGTACCTTGGGTGGGAGGTCATTTGACACTGTCAGGGTTGATTAGTGGTAGAAAAGCGCAACTAGGACGGACAA
1810046K07Rik	ENSMUST00000039959	CGCGGTGGTGGTACGACATGATGAAAGGAATGGGTTGTGGTCAGTAAGCTCTCCGGCACTCATAAGAGCCCATGTGGAGGGATTGAAGGATAAGCGCAACTAGGACGGACAA
1810046K07Rik	ENSMUST00000039959	CGCGGTGGTGGTACGACATGATGAAAGGAATGGGTTGTGGTAACTGTTTGCTGCTATGGAAGTCGGAATCGAAGTTGAGGTGGGAGAGTATTAGCGCAACTAGGACGGACAA
1810046K07Rik	ENSMUST00000039959	CGCGGTGGTGGTACGACATGATGTGGAGGGATTGAAGGATACCTGACATCACTGGCGATCCTGGCATCTGGAGGGTTGATTAGTGGTAGAAAAGCGCAACTAGGACGGACAA
1810046K07Rik	ENSMUST00000039959	CGCGGTGGTGGTACGACATGAAGTTGAGGTGGGAGAGTATTATGAGTACTGTTGTCAACTAGCACTGACAGAGGGTTGATTAGTGGTAGAAAAGCGCAACTAGGACGGACAA
1810046K07Rik	ENSMUST00000039959	CGCGGTGGTGGTACGACATGAAGTTGAGGTGGGAGAGTATTCTGGCGATCCTGGCATCTGGATGAACGGAGATGTGGAGGGATTGAAGGATAAGCGCAACTAGGACGGACAA
1810046K07Rik	ENSMUST00000039959	CGCGGTGGTGGTACGACATGATGAAAGGAATGGGTTGTGGTTTGTCAACTAGCACTGACAGAATTGTGGCTAGGGTTGATTAGTGGTAGAAAAGCGCAACTAGGACGGACAA
1810046K07Rik	ENSMUST00000039959	CGCGGTGGTGGTACGACATGATGTGGAGGGATTGAAGGATATGTCTGCCTGGATCGCTTTTCTGCCAGGAGATGAAAGGAATGGGTTGTGGTAGCGCAACTAGGACGGACAA
1810046K07Rik	ENSMUST00000039959	CGCGGTGGTGGTACGACATGAAGTTGAGGTGGGAGAGTATTTGAAGAGAAGAGACATCTGACCCTTCCTCTATGAAAGGAATGGGTTGTGGTAGCGCAACTAGGACGGACAA
1810046K07Rik	ENSMUST00000039959	CGCGGTGGTGGTACGACATGAGGGTTGATTAGTGGTAGAAATGGACACAGAGTCCAACTTCTCTATAAGGAATGTGGAGGGATTGAAGGATAAGCGCAACTAGGACGGACAA
1810046K07Rik	ENSMUST00000039959	CGCGGTGGTGGTACGACATGAAGTTGAGGTGGGAGAGTATTACCATAGTAACCTGACATCACTGGCGATCCAGGGTTGATTAGTGGTAGAAAAGCGCAACTAGGACGGACAA
1810046K07Rik	ENSMUST00000039959	CGCGGTGGTGGTACGACATGAAGTTGAGGTGGGAGAGTATTAATCCAGTTCTGAATGAGCAAGCACACCTAATGTGGAGGGATTGAAGGATAAGCGCAACTAGGACGGACAA
1810046K07Rik	ENSMUST00000039959	CGCGGTGGTGGTACGACATGAGGGTTGATTAGTGGTAGAAAAGCACACCTAGAAAACTCTGTGGACACAGAATGAAAGGAATGGGTTGTGGTAGCGCAACTAGGACGGACAA
1810046K07Rik	ENSMUST00000039959	CGCGGTGGTGGTACGACATGATGAAAGGAATGGGTTGTGGTGTGTGCTTCACTCTCACACCCTGGTACACGATGTGGAGGGATTGAAGGATAAGCGCAACTAGGACGGACAA
1810046K07Rik	ENSMUST00000039959	CGCGGTGGTGGTACGACATGATGAAAGGAATGGGTTGTGGTGATCGCTTTTCTGCCAGGAGATCTTTGACTAAGTTGAGGTGGGAGAGTATTAGCGCAACTAGGACGGACAA
1810046K07Rik	ENSMUST00000039959	CGCGGTGGTGGTACGACATGAGGGTTGATTAGTGGTAGAAACTCCTTGTGAAGGTTGTCTCATTAGGATGTATGTGGAGGGATTGAAGGATAAGCGCAACTAGGACGGACAA
1810046K07Rik	ENSMUST00000039959	CGCGGTGGTGGTACGACATGAAGTTGAGGTGGGAGAGTATTTGAAGGGGTATGGAGGTGAGGTAGGGTACCAGGGTTGATTAGTGGTAGAAAAGCGCAACTAGGACGGACAA
1810046K07Rik	ENSMUST00000039959	CGCGGTGGTGGTACGACATGAAGTTGAGGTGGGAGAGTATTGACAGGAAGGATCTCCTGACACCATAGTAAATGTGGAGGGATTGAAGGATAAGCGCAACTAGGACGGACAA
1810046K07Rik	ENSMUST00000039959	CGCGGTGGTGGTACGACATGAGGGTTGATTAGTGGTAGAAACTCATGCCGGAGGTGTAGAGGTCATTCGAGATGAAAGGAATGGGTTGTGGTAGCGCAACTAGGACGGACAA
1810046K07Rik	ENSMUST00000039959	CGCGGTGGTGGTACGACATGATGTGGAGGGATTGAAGGATATGAAATGGGTTCCTAAAGCTCTAAGGTGGCATGAAAGGAATGGGTTGTGGTAGCGCAACTAGGACGGACAA
5031425F14Rik	ENSMUST00000127920	CGCGGTGGTGGTACGACATGAATAGGAAATGGTGGTAGTGTAAGCAGGGTGTGAGGCAAGTCCCAGGAAGTATAGAGTTGATAGAGGGAGAAAGCGCAACTAGGACGGACAA
5031425F14Rik	ENSMUST00000127920	CGCGGTGGTGGTACGACATGAAGGAGGAGGGTAATGATAGACAGCTCAGGGCTGCTCCAATTCAGAGTCTCAATAGGAAATGGTGGTAGTGTAGCGCAACTAGGACGGACAA
5031425F14Rik	ENSMUST00000127920	CGCGGTGGTGGTACGACATGAAGTTGAGGTGGGAGAGTATTATGGCTCATGATTCCTCACGAACCCAATCCAATAGGAAATGGTGGTAGTGTAGCGCAACTAGGACGGACAA
5031425F14Rik	ENSMUST00000127920	CGCGGTGGTGGTACGACATGAAGGAGGAGGGTAATGATAGATAAACCAGCTCACTCCTAACAAGAGAGGCAATAGAGTTGATAGAGGGAGAAAGCGCAACTAGGACGGACAA
5031425F14Rik	ENSMUST00000127920	CGCGGTGGTGGTACGACATGATAGAGTTGATAGAGGGAGAAGGAGCTCAGTACACCTCCGTGACCCACAGAAAGTTGAGGTGGGAGAGTATTAGCGCAACTAGGACGGACAA
5031425F14Rik	ENSMUST00000127920	CGCGGTGGTGGTACGACATGAAGTTGAGGTGGGAGAGTATTGGCTCCTGAAAATGGAAACAAGTACAAGAAAAGGAGGAGGGTAATGATAGAAGCGCAACTAGGACGGACAA
5031425F14Rik	ENSMUST00000127920	CGCGGTGGTGGTACGACATGATAGAGTTGATAGAGGGAGAAAGAACTACCCTGAGAGGGGAGAAACCACTGAATAGGAAATGGTGGTAGTGTAGCGCAACTAGGACGGACAA
5031425F14Rik	ENSMUST00000127920	CGCGGTGGTGGTACGACATGAATAGGAAATGGTGGTAGTGTCAGACAGCGTCTGCTCTGCTCGTAACAAAGAAGGAGGAGGGTAATGATAGAAGCGCAACTAGGACGGACAA
5031425F14Rik	ENSMUST00000127920	CGCGGTGGTGGTACGACATGAAGTTGAGGTGGGAGAGTATTAAAACGGTGACTACCTCAGTAAAGGTCTGAAATAGGAAATGGTGGTAGTGTAGCGCAACTAGGACGGACAA
5031425F14Rik	ENSMUST00000127920	CGCGGTGGTGGTACGACATGATAGAGTTGATAGAGGGAGAACAGCTTGTCTCAAGAAGCTCACGGAACCCGAAGGAGGAGGGTAATGATAGAAGCGCAACTAGGACGGACAA
5031425F14Rik	ENSMUST00000127920	CGCGGTGGTGGTACGACATGAAGTTGAGGTGGGAGAGTATTTGTGGACTACAGTCTGGACTATGCTGAGCTATAGAGTTGATAGAGGGAGAAAGCGCAACTAGGACGGACAA
5031425F14Rik	ENSMUST00000127920	CGCGGTGGTGGTACGACATGAAGTTGAGGTGGGAGAGTATTTGGGAGTAGAGGAAACCATTCAAGCAGAAAAAGGAGGAGGGTAATGATAGAAGCGCAACTAGGACGGACAA
5031425F14Rik	ENSMUST00000127920	CGCGGTGGTGGTACGACATGATAGAGTTGATAGAGGGAGAACGTCCTGATGAGAGTCCAGAACTAGGGTCCAATAGGAAATGGTGGTAGTGTAGCGCAACTAGGACGGACAA
5031425F14Rik	ENSMUST00000127920	CGCGGTGGTGGTACGACATGAATAGGAAATGGTGGTAGTGTCTCATCCATCTTGTCCTGAGTGGATGTGTTAAGGAGGAGGGTAATGATAGAAGCGCAACTAGGACGGACAA
5031425F14Rik	ENSMUST00000127920	CGCGGTGGTGGTACGACATGAATAGGAAATGGTGGTAGTGTCTGATGCCAACGTCCTGATGAGAGTCCAGAAAGTTGAGGTGGGAGAGTATTAGCGCAACTAGGACGGACAA
5031425F14Rik	ENSMUST00000127920	CGCGGTGGTGGTACGACATGAAGGAGGAGGGTAATGATAGAGAAAGGAGCCTAGAGCGTGAAAGCAGGGTGATAGAGTTGATAGAGGGAGAAAGCGCAACTAGGACGGACAA
5031425F14Rik	ENSMUST00000127920	CGCGGTGGTGGTACGACATGATAGAGTTGATAGAGGGAGAACTCTCACATCTGTGGACTACAGTCTGGACTAAGTTGAGGTGGGAGAGTATTAGCGCAACTAGGACGGACAA
5031425F14Rik	ENSMUST00000127920	CGCGGTGGTGGTACGACATGAAGGAGGAGGGTAATGATAGAAAGGCCTCTTGTCTCGGTGCCTCTCACATCAAGTTGAGGTGGGAGAGTATTAGCGCAACTAGGACGGACAA
5031425F14Rik	ENSMUST00000127920	CGCGGTGGTGGTACGACATGATAGAGTTGATAGAGGGAGAACCCCAATATGAACATGGAGACCCCAGAAGCAATAGGAAATGGTGGTAGTGTAGCGCAACTAGGACGGACAA
5031425F14Rik	ENSMUST00000127920	CGCGGTGGTGGTACGACATGAATAGGAAATGGTGGTAGTGTCGATTAACTGATCTGCAGATGGAGCTCAGTAAGGAGGAGGGTAATGATAGAAGCGCAACTAGGACGGACAA
5031425F14Rik	ENSMUST00000127920	CGCGGTGGTGGTACGACATGAAGTTGAGGTGGGAGAGTATTAACATGGAGACCCCAGAAGCCAGGCCACACAATAGGAAATGGTGGTAGTGTAGCGCAACTAGGACGGACAA
5031425F14Rik	ENSMUST00000127920	CGCGGTGGTGGTACGACATGATAGAGTTGATAGAGGGAGAAGTAATCACGACCGACAGATTAAAACGGTGAAAGGAGGAGGGTAATGATAGAAGCGCAACTAGGACGGACAA
5031425F14Rik	ENSMUST00000127920	CGCGGTGGTGGTACGACATGATAGAGTTGATAGAGGGAGAACCTTAATTCTGTGTGGCCCATGTCACCTTCAAGTTGAGGTGGGAGAGTATTAGCGCAACTAGGACGGACAA
5031425F14Rik	ENSMUST00000127920	CGCGGTGGTGGTACGACATGAAGGAGGAGGGTAATGATAGATGGATGTGTTGAGAGGTGGGTCGCAGGCAGAAGTTGAGGTGGGAGAGTATTAGCGCAACTAGGACGGACAA
5031425F14Rik	ENSMUST00000127920	CGCGGTGGTGGTACGACATGATAGAGTTGATAGAGGGAGAAAAGCGTCTGAGACACGGCCTGTGGTCTGTGAATAGGAAATGGTGGTAGTGTAGCGCAACTAGGACGGACAA
5031425F14Rik	ENSMUST00000127920	CGCGGTGGTGGTACGACATGAAGGAGGAGGGTAATGATAGATCTCTCCAGCACAAGGCTGCTCCAGCTCAGAATAGGAAATGGTGGTAGTGTAGCGCAACTAGGACGGACAA
5031425F14Rik	ENSMUST00000127920	CGCGGTGGTGGTACGACATGAAGTTGAGGTGGGAGAGTATTTGTCTACAACAGTAGAGGCGTTGAGCCATCAATAGGAAATGGTGGTAGTGTAGCGCAACTAGGACGGACAA
5031425F14Rik	ENSMUST00000127920	CGCGGTGGTGGTACGACATGAAGGAGGAGGGTAATGATAGATCTGGGGAGGCCAATGGTCATGTGTTGCTTATAGAGTTGATAGAGGGAGAAAGCGCAACTAGGACGGACAA
5031425F14Rik	ENSMUST00000127920	CGCGGTGGTGGTACGACATGATAGAGTTGATAGAGGGAGAAACGGAACCCGACTAGCTGACTCCCCTCCTTAAGTTGAGGTGGGAGAGTATTAGCGCAACTAGGACGGACAA
5031425F14Rik	ENSMUST00000127920	CGCGGTGGTGGTACGACATGAAGTTGAGGTGGGAGAGTATTCCACATTTGTTAGCGATTAACTGATCTGCAAAGGAGGAGGGTAATGATAGAAGCGCAACTAGGACGGACAA
5031425F14Rik	ENSMUST00000127920	CGCGGTGGTGGTACGACATGATAGAGTTGATAGAGGGAGAAGATGCGTTCACTGATGCCAACGTCCTGATGAATAGGAAATGGTGGTAGTGTAGCGCAACTAGGACGGACAA
5031425F14Rik	ENSMUST00000127920	CGCGGTGGTGGTACGACATGAAGGAGGAGGGTAATGATAGACCCTGATCCTGCCATTCGAGTGCCTGGATCAATAGGAAATGGTGGTAGTGTAGCGCAACTAGGACGGACAA
5031425F14Rik	ENSMUST00000127920	CGCGGTGGTGGTACGACATGAATAGGAAATGGTGGTAGTGTAATGGCTTGGCAAAGCGTCTGAGACACGGCAAGTTGAGGTGGGAGAGTATTAGCGCAACTAGGACGGACAA
5031425F14Rik	ENSMUST00000127920	CGCGGTGGTGGTACGACATGATAGAGTTGATAGAGGGAGAACCCCTAATCCTGAGTCCTAGTCCCTTCCTGAAGGAGGAGGGTAATGATAGAAGCGCAACTAGGACGGACAA
5031425F14Rik	ENSMUST00000127920	CGCGGTGGTGGTACGACATGAAGTTGAGGTGGGAGAGTATTTGTGTTGCTTCTGGAGTCTGTGGCTCTCCTATAGAGTTGATAGAGGGAGAAAGCGCAACTAGGACGGACAA
5031425F14Rik	ENSMUST00000127920	CGCGGTGGTGGTACGACATGAAGGAGGAGGGTAATGATAGAGGCTGCTCCAGCTCAGAGTTATTGGGAGGAAAGTTGAGGTGGGAGAGTATTAGCGCAACTAGGACGGACAA
5031425F14Rik	ENSMUST00000127920	CGCGGTGGTGGTACGACATGAATAGGAAATGGTGGTAGTGTAGCATAGGGCTGTTCCAGCTCAGAGTCTCTATAGAGTTGATAGAGGGAGAAAGCGCAACTAGGACGGACAA
5031425F14Rik	ENSMUST00000127920	CGCGGTGGTGGTACGACATGAATAGGAAATGGTGGTAGTGTCCCTTTAAGGGCACAAGCTATGAGCTCTTCAAGGAGGAGGGTAATGATAGAAGCGCAACTAGGACGGACAA
5031425F14Rik	ENSMUST00000127920	CGCGGTGGTGGTACGACATGAATAGGAAATGGTGGTAGTGTAGAGTCCAGAACTAGGGTCCCCACAGACAGAAGTTGAGGTGGGAGAGTATTAGCGCAACTAGGACGGACAA
5031425F14Rik	ENSMUST00000127920	CGCGGTGGTGGTACGACATGATAGAGTTGATAGAGGGAGAACACAGGCTCATGGCCTCTGTGTGCCAGAACAAGGAGGAGGGTAATGATAGAAGCGCAACTAGGACGGACAA
5031425F14Rik	ENSMUST00000127920	CGCGGTGGTGGTACGACATGATAGAGTTGATAGAGGGAGAAACAGCTCCAAAATGGCTTGGCAAAGCGTCTAAGTTGAGGTGGGAGAGTATTAGCGCAACTAGGACGGACAA
5031425F14Rik	ENSMUST00000127920	CGCGGTGGTGGTACGACATGAAGGAGGAGGGTAATGATAGAGCCTGTGGTCTGTGCTGGGTGAAAACTCGCAAGTTGAGGTGGGAGAGTATTAGCGCAACTAGGACGGACAA
5031425F14Rik	ENSMUST00000127920	CGCGGTGGTGGTACGACATGAATAGGAAATGGTGGTAGTGTGCCATTCGAGTGCCTGGATCCAGCCATGTCATAGAGTTGATAGAGGGAGAAAGCGCAACTAGGACGGACAA
5031425F14Rik	ENSMUST00000127920	CGCGGTGGTGGTACGACATGAAGGAGGAGGGTAATGATAGACGATGCAGAAGCTTATTAATGCCCCAATATAATAGGAAATGGTGGTAGTGTAGCGCAACTAGGACGGACAA
5031425F14Rik	ENSMUST00000127920	CGCGGTGGTGGTACGACATGAAGTTGAGGTGGGAGAGTATTCAGCCATGTCTGAAGTCGATCCCTTTAAGGAATAGGAAATGGTGGTAGTGTAGCGCAACTAGGACGGACAA
5031425F14Rik	ENSMUST00000127920	CGCGGTGGTGGTACGACATGAAGGAGGAGGGTAATGATAGATCCGGAAGCACCATCTCTCTAACCAAGCAGATAGAGTTGATAGAGGGAGAAAGCGCAACTAGGACGGACAA
5031425F14Rik	ENSMUST00000127920	CGCGGTGGTGGTACGACATGAAGTTGAGGTGGGAGAGTATTAACCCAATCCCAGTGCCAGAGTCAGAGCTTATAGAGTTGATAGAGGGAGAAAGCGCAACTAGGACGGACAA
5031425F14Rik	ENSMUST00000127920	CGCGGTGGTGGTACGACATGAAGTTGAGGTGGGAGAGTATTGTGTGGCCCATGTCACCTTCCAGCTTGTCTAAGGAGGAGGGTAATGATAGAAGCGCAACTAGGACGGACAA
5031425F14Rik	ENSMUST00000127920	CGCGGTGGTGGTACGACATGATAGAGTTGATAGAGGGAGAACCAATGGTCATGTGTTGCTTCTGGAGTCTGAATAGGAAATGGTGGTAGTGTAGCGCAACTAGGACGGACAA
5031425F14Rik	ENSMUST00000127920	CGCGGTGGTGGTACGACATGAATAGGAAATGGTGGTAGTGTCCTCTTTCTAGACTGTGTGTTGCAAAAGTTAAGGAGGAGGGTAATGATAGAAGCGCAACTAGGACGGACAA
5031425F14Rik	ENSMUST00000127920	CGCGGTGGTGGTACGACATGAAGTTGAGGTGGGAGAGTATTGCACAAGCTATGAGCTCTTCCTATCATACTAATAGGAAATGGTGGTAGTGTAGCGCAACTAGGACGGACAA
5031425F14Rik	ENSMUST00000127920	CGCGGTGGTGGTACGACATGATAGAGTTGATAGAGGGAGAATGTTCCAGCTCAGAGTCTCTCCAGCTCAGGAAGGAGGAGGGTAATGATAGAAGCGCAACTAGGACGGACAA
5031425F14Rik	ENSMUST00000127920	CGCGGTGGTGGTACGACATGATAGAGTTGATAGAGGGAGAAAACCGAAGCAGGCGTTCTGAAAACCCCACTAAGTTGAGGTGGGAGAGTATTAGCGCAACTAGGACGGACAA
5031425F14Rik	ENSMUST00000127920	CGCGGTGGTGGTACGACATGAAGTTGAGGTGGGAGAGTATTGTCTCGGTGCCTCTCACATCTGTGGACTACAAGGAGGAGGGTAATGATAGAAGCGCAACTAGGACGGACAA
5031425F14Rik	ENSMUST00000127920	CGCGGTGGTGGTACGACATGATAGAGTTGATAGAGGGAGAAGAGAGATGGAGGGGTTGTTTCCCTGATCCTAATAGGAAATGGTGGTAGTGTAGCGCAACTAGGACGGACAA
5031425F14Rik	ENSMUST00000127920	CGCGGTGGTGGTACGACATGAATAGGAAATGGTGGTAGTGTTAGAGCGTGAAAGCAGGGTGTGAGGCAAGTAAGGAGGAGGGTAATGATAGAAGCGCAACTAGGACGGACAA
5031425F14Rik	ENSMUST00000127920	CGCGGTGGTGGTACGACATGAATAGGAAATGGTGGTAGTGTCCGACAGATTAAAACGGTGACTACCTCAGTAAGTTGAGGTGGGAGAGTATTAGCGCAACTAGGACGGACAA
5031425F14Rik	ENSMUST00000127920	CGCGGTGGTGGTACGACATGATAGAGTTGATAGAGGGAGAACCATCTCTCTAACCAAGCAGAGTGCCCAGCAAGGAGGAGGGTAATGATAGAAGCGCAACTAGGACGGACAA
5031425F14Rik	ENSMUST00000127920	CGCGGTGGTGGTACGACATGAAGTTGAGGTGGGAGAGTATTTGAAGTCGATCCCTTTAAGGGCACAAGCTAATAGAGTTGATAGAGGGAGAAAGCGCAACTAGGACGGACAA
5031425F14Rik	ENSMUST00000127920	CGCGGTGGTGGTACGACATGAAGGAGGAGGGTAATGATAGAAGACCACTCTCGATGCAGAAGCTTATTAATAAGTTGAGGTGGGAGAGTATTAGCGCAACTAGGACGGACAA
5031425F14Rik	ENSMUST00000127920	CGCGGTGGTGGTACGACATGAATAGGAAATGGTGGTAGTGTTCCCCTCCTTCCTCTTTCTAGACTGTGTGTATAGAGTTGATAGAGGGAGAAAGCGCAACTAGGACGGACAA
5031425F14Rik	ENSMUST00000127920	CGCGGTGGTGGTACGACATGAATAGGAAATGGTGGTAGTGTTTGGGGTTTCTGTCTACAACAGTAGAGGCGAAGGAGGAGGGTAATGATAGAAGCGCAACTAGGACGGACAA
5031425F14Rik	ENSMUST00000127920	CGCGGTGGTGGTACGACATGAATAGGAAATGGTGGTAGTGTAGTCTGGACTATGCTGAGCTAGACCACTCTAAGTTGAGGTGGGAGAGTATTAGCGCAACTAGGACGGACAA
5031425F14Rik	ENSMUST00000127920	CGCGGTGGTGGTACGACATGAAGGAGGAGGGTAATGATAGAAAAGGTCTGAGATGCGTTCACTGATGCCAAATAGAGTTGATAGAGGGAGAAAGCGCAACTAGGACGGACAA
5031425F14Rik	ENSMUST00000127920	CGCGGTGGTGGTACGACATGAAGTTGAGGTGGGAGAGTATTCAAGAAGCTCACGGAACCCGACTAGCTGACATAGAGTTGATAGAGGGAGAAAGCGCAACTAGGACGGACAA
5031425F14Rik	ENSMUST00000127920	CGCGGTGGTGGTACGACATGAAGTTGAGGTGGGAGAGTATTTGTTCCAGCTCGGGGTCTCTCCAGCACAAGAAGGAGGAGGGTAATGATAGAAGCGCAACTAGGACGGACAA
5031425F14Rik	ENSMUST00000127920	CGCGGTGGTGGTACGACATGATAGAGTTGATAGAGGGAGAACCTGGAAGCTATTAGTCTCATCCTCATCCAAATAGGAAATGGTGGTAGTGTAGCGCAACTAGGACGGACAA
5031425F14Rik	ENSMUST00000127920	CGCGGTGGTGGTACGACATGAAGGAGGAGGGTAATGATAGAAGTAGAGGCGTTGAGCCATCGGTGGATGCCAATAGGAAATGGTGGTAGTGTAGCGCAACTAGGACGGACAA
5031425F14Rik	ENSMUST00000127920	CGCGGTGGTGGTACGACATGAATAGGAAATGGTGGTAGTGTTGTGCTGGGTGAAAACTCGCCCACATTTGTAAGTTGAGGTGGGAGAGTATTAGCGCAACTAGGACGGACAA
5031425F14Rik	ENSMUST00000127920	CGCGGTGGTGGTACGACATGATAGAGTTGATAGAGGGAGAAGTCAGAGCTTCACAGGCTCATGGCCTCTGTAAGGAGGAGGGTAATGATAGAAGCGCAACTAGGACGGACAA
5031425F14Rik	ENSMUST00000127920	CGCGGTGGTGGTACGACATGAAGTTGAGGTGGGAGAGTATTTGAGGCAAGTCCCAGGAAGTTCTGGGGAGGATAGAGTTGATAGAGGGAGAAAGCGCAACTAGGACGGACAA
5031425F14Rik	ENSMUST00000127920	CGCGGTGGTGGTACGACATGAAGTTGAGGTGGGAGAGTATTAACCAAGCAGAGTGCCCAGCAACCGAAGCAAAGGAGGAGGGTAATGATAGAAGCGCAACTAGGACGGACAA
5031425F14Rik	ENSMUST00000127920	CGCGGTGGTGGTACGACATGAATAGGAAATGGTGGTAGTGTGCCAGTGCAGAGGTCGCTGTGAAGGTCAGTATAGAGTTGATAGAGGGAGAAAGCGCAACTAGGACGGACAA
5031425F14Rik	ENSMUST00000127920	CGCGGTGGTGGTACGACATGAATAGGAAATGGTGGTAGTGTCAGTGCCAGAGTCAGAGCTTCACAGGCTCAAAGGAGGAGGGTAATGATAGAAGCGCAACTAGGACGGACAA
5031425F14Rik	ENSMUST00000127920	CGCGGTGGTGGTACGACATGAATAGGAAATGGTGGTAGTGTTGGTGGGAGGGAGAGATGGAGGGGTTGTTTAAGTTGAGGTGGGAGAGTATTAGCGCAACTAGGACGGACAA
5031425F14Rik	ENSMUST00000127920	CGCGGTGGTGGTACGACATGATAGAGTTGATAGAGGGAGAAATCTGCAGATGGAGCTCAGTACACCTCCGTAAGGAGGAGGGTAATGATAGAAGCGCAACTAGGACGGACAA
5031425F14Rik	ENSMUST00000127920	CGCGGTGGTGGTACGACATGATAGAGTTGATAGAGGGAGAATAGTCTCATCCTCATCCATCTTGTCCTGAGAAGTTGAGGTGGGAGAGTATTAGCGCAACTAGGACGGACAA
5031425F14Rik	ENSMUST00000127920	CGCGGTGGTGGTACGACATGAAGTTGAGGTGGGAGAGTATTGAAAACTCGCCCACATTTGTTAGCGATTAAAAGGAGGAGGGTAATGATAGAAGCGCAACTAGGACGGACAA
5031425F14Rik	ENSMUST00000127920	CGCGGTGGTGGTACGACATGAATAGGAAATGGTGGTAGTGTGACCGACTGGAGGCCATCTCATGGCTCATGATAGAGTTGATAGAGGGAGAAAGCGCAACTAGGACGGACAA
5031425F14Rik	ENSMUST00000127920	CGCGGTGGTGGTACGACATGAAGGAGGAGGGTAATGATAGATGCCTGGATCCAGCCATGTCTGAAGTCGATAATAGGAAATGGTGGTAGTGTAGCGCAACTAGGACGGACAA
5031425F14Rik	ENSMUST00000127920	CGCGGTGGTGGTACGACATGAAGTTGAGGTGGGAGAGTATTCAGTCTTATAACTGGAGCTGAAGGCCTCTTAATAGGAAATGGTGGTAGTGTAGCGCAACTAGGACGGACAA
5031425F14Rik	ENSMUST00000127920	CGCGGTGGTGGTACGACATGAAGGAGGAGGGTAATGATAGAGAAACCACTGACAACCAAAATGGTGGGAGGATAGAGTTGATAGAGGGAGAAAGCGCAACTAGGACGGACAA
5031425F14Rik	ENSMUST00000127920	CGCGGTGGTGGTACGACATGAAGTTGAGGTGGGAGAGTATTACACCTCCGTGACCCACAGATAAACCAGCTATAGAGTTGATAGAGGGAGAAAGCGCAACTAGGACGGACAA
5031425F14Rik	ENSMUST00000127920	CGCGGTGGTGGTACGACATGAAGTTGAGGTGGGAGAGTATTTGTCACCTTCCAGCTTGTCTCAAGAAGCTCAAGGAGGAGGGTAATGATAGAAGCGCAACTAGGACGGACAA
5031425F14Rik	ENSMUST00000127920	CGCGGTGGTGGTACGACATGAATAGGAAATGGTGGTAGTGTACTGGAGCTGAAGGCCTCTTGTCTCGGTGCATAGAGTTGATAGAGGGAGAAAGCGCAACTAGGACGGACAA
5031425F14Rik	ENSMUST00000127920	CGCGGTGGTGGTACGACATGAAGGAGGAGGGTAATGATAGATTGTCCTGAGTGGATGTGTTGAGAGGTGGGAATAGGAAATGGTGGTAGTGTAGCGCAACTAGGACGGACAA
5031425F14Rik	ENSMUST00000127920	CGCGGTGGTGGTACGACATGAAGTTGAGGTGGGAGAGTATTGATGACTCGGCCCCTAATCCTGAGTCCTAGAATAGGAAATGGTGGTAGTGTAGCGCAACTAGGACGGACAA
5031425F14Rik	ENSMUST00000127920	CGCGGTGGTGGTACGACATGAAGGAGGAGGGTAATGATAGAACCAGAGAAAGAAAGGAGCCTAGAGCGTGAATAGAGTTGATAGAGGGAGAAAGCGCAACTAGGACGGACAA
5031425F14Rik	ENSMUST00000127920	CGCGGTGGTGGTACGACATGATAGAGTTGATAGAGGGAGAAACTAGGGTCCCCACAGACAGCGTCTGCTCTAAGTTGAGGTGGGAGAGTATTAGCGCAACTAGGACGGACAA
5031425F14Rik	ENSMUST00000127920	CGCGGTGGTGGTACGACATGAAGTTGAGGTGGGAGAGTATTTGAGTCCTAGTCCCTTCCTGCCCTGCTGACAAGGAGGAGGGTAATGATAGAAGCGCAACTAGGACGGACAA
5031425F14Rik	ENSMUST00000127920	CGCGGTGGTGGTACGACATGAATAGGAAATGGTGGTAGTGTCACTCCTAACAAGAGAGGCAGCTCGGGACTATAGAGTTGATAGAGGGAGAAAGCGCAACTAGGACGGACAA
5031425F14Rik	ENSMUST00000127920	CGCGGTGGTGGTACGACATGAAGGAGGAGGGTAATGATAGACTGCTCCAATTCAGAGTCTCTCCAGCTCAGAATAGGAAATGGTGGTAGTGTAGCGCAACTAGGACGGACAA
5730522E02Rik	ENSMUST00000109511	CGCGGTGGTGGTACGACATGAAGGTTAGGTTGAGAATAGGATAGGCTTGTACCGAATGATACCAAGATGATAGATGATGTAGTAGTAAGGGTAGCGCAACTAGGACGGACAA
5730522E02Rik	ENSMUST00000109511	CGCGGTGGTGGTACGACATGAAGGTTAGGTTGAGAATAGGAGGAAAATTCAGGCTGAGACTCTTTTCTCAAAGGAGTAGTTGGTTGTTAGGAAGCGCAACTAGGACGGACAA
5730522E02Rik	ENSMUST00000109511	CGCGGTGGTGGTACGACATGAAGGTTAGGTTGAGAATAGGACGGGACAGGAATGTTTAGAAAAGAGATCCTATGTGGTTTGGAGATGATAGAAGCGCAACTAGGACGGACAA
5730522E02Rik	ENSMUST00000109511	CGCGGTGGTGGTACGACATGAGATGATGTAGTAGTAAGGGTGGGCAGAGGCAGGGGAATTGATCTCTGTGAAGGAGTAGTTGGTTGTTAGGAAGCGCAACTAGGACGGACAA
5730522E02Rik	ENSMUST00000109511	CGCGGTGGTGGTACGACATGATGTGGTTTGGAGATGATAGAACTTTCTGAATTCAGACATGGTGATGAGGAAGATGATGTAGTAGTAAGGGTAGCGCAACTAGGACGGACAA
5730522E02Rik	ENSMUST00000109511	CGCGGTGGTGGTACGACATGATGTGGTTTGGAGATGATAGAAGGGGAATTGATCTCTGTGAGTTTCAGGCCAGGAGTAGTTGGTTGTTAGGAAGCGCAACTAGGACGGACAA
5730522E02Rik	ENSMUST00000109511	CGCGGTGGTGGTACGACATGAGATGATGTAGTAGTAAGGGTGCACTTACTTCGGGACAGGAATGTTTAGAAAAGGTTAGGTTGAGAATAGGAAGCGCAACTAGGACGGACAA
5730522E02Rik	ENSMUST00000109511	CGCGGTGGTGGTACGACATGAGGAGTAGTTGGTTGTTAGGACCGAATGATACCAAGATGATCAGTGTGAACAAGGTTAGGTTGAGAATAGGAAGCGCAACTAGGACGGACAA
5730522E02Rik	ENSMUST00000109511	CGCGGTGGTGGTACGACATGAAGGTTAGGTTGAGAATAGGAGGAGTGGCAGTTAGATGTTCTCAGGAGGGCATGTGGTTTGGAGATGATAGAAGCGCAACTAGGACGGACAA
5730522E02Rik	ENSMUST00000109511	CGCGGTGGTGGTACGACATGAGATGATGTAGTAGTAAGGGTCTTTGAGGCCAGATGTGGAACCACACACCTAGGAGTAGTTGGTTGTTAGGAAGCGCAACTAGGACGGACAA
5730522E02Rik	ENSMUST00000109511	CGCGGTGGTGGTACGACATGAGATGATGTAGTAGTAAGGGTTGCTCCTGGAAGAAGTCCAAACTGGTAGGTATGTGGTTTGGAGATGATAGAAGCGCAACTAGGACGGACAA
5730522E02Rik	ENSMUST00000109511	CGCGGTGGTGGTACGACATGATGTGGTTTGGAGATGATAGACTCGCTCCGCCATGATTGCTTTGTTTCGCTAGGAGTAGTTGGTTGTTAGGAAGCGCAACTAGGACGGACAA
5730522E02Rik	ENSMUST00000109511	CGCGGTGGTGGTACGACATGAAGGTTAGGTTGAGAATAGGACAATTATCTCCAGCAAATCTCCAGTGAGGTAGATGATGTAGTAGTAAGGGTAGCGCAACTAGGACGGACAA
5730522E02Rik	ENSMUST00000109511	CGCGGTGGTGGTACGACATGAAGGTTAGGTTGAGAATAGGAGGCACACAGAGAAAGGTCAGGGAATTAAATAGGAGTAGTTGGTTGTTAGGAAGCGCAACTAGGACGGACAA
5730522E02Rik	ENSMUST00000109511	CGCGGTGGTGGTACGACATGAAGGTTAGGTTGAGAATAGGAGAGTCTGTCTTCTGGGATACATTCCACATAATGTGGTTTGGAGATGATAGAAGCGCAACTAGGACGGACAA
5730522E02Rik	ENSMUST00000109511	CGCGGTGGTGGTACGACATGAGATGATGTAGTAGTAAGGGTCTACACACACTAGGCTTGTACCGAATGATAAGGAGTAGTTGGTTGTTAGGAAGCGCAACTAGGACGGACAA
5730522E02Rik	ENSMUST00000109511	CGCGGTGGTGGTACGACATGATGTGGTTTGGAGATGATAGAAGCCATAACACTTTGAGGCCAGATGTGGAAAGATGATGTAGTAGTAAGGGTAGCGCAACTAGGACGGACAA
5730522E02Rik	ENSMUST00000109511	CGCGGTGGTGGTACGACATGAGGAGTAGTTGGTTGTTAGGACAAGAACTAAGACTGACAGGGGCACACAGAATGTGGTTTGGAGATGATAGAAGCGCAACTAGGACGGACAA
5730522E02Rik	ENSMUST00000109511	CGCGGTGGTGGTACGACATGAAGGTTAGGTTGAGAATAGGACTTCTGGCAGGGTTTTCTGCAGCCCATATCAGATGATGTAGTAGTAAGGGTAGCGCAACTAGGACGGACAA
5730522E02Rik	ENSMUST00000109511	CGCGGTGGTGGTACGACATGAAGGTTAGGTTGAGAATAGGAAGATGTGGAACCACACACCTTTAATCTCAGAGGAGTAGTTGGTTGTTAGGAAGCGCAACTAGGACGGACAA
5730522E02Rik	ENSMUST00000109511	CGCGGTGGTGGTACGACATGATGTGGTTTGGAGATGATAGAAGGCCATTCTCTTCTACATGGCAAATTCCAAAGGTTAGGTTGAGAATAGGAAGCGCAACTAGGACGGACAA
5730522E02Rik	ENSMUST00000109511	CGCGGTGGTGGTACGACATGAGGAGTAGTTGGTTGTTAGGACTCTCTGCCCCAATTATCTCCAGCAAATCTAGATGATGTAGTAGTAAGGGTAGCGCAACTAGGACGGACAA
5730522E02Rik	ENSMUST00000109511	CGCGGTGGTGGTACGACATGAGATGATGTAGTAGTAAGGGTCCTCTTACTGTCCTTGATCTTGCTGTTTGTATGTGGTTTGGAGATGATAGAAGCGCAACTAGGACGGACAA
5730522E02Rik	ENSMUST00000109511	CGCGGTGGTGGTACGACATGAGGAGTAGTTGGTTGTTAGGAATTGGTTTTCTGCTCCTGGAAGAAGTCCAAATGTGGTTTGGAGATGATAGAAGCGCAACTAGGACGGACAA
5730522E02Rik	ENSMUST00000109511	CGCGGTGGTGGTACGACATGAGATGATGTAGTAGTAAGGGTGCTTTCTTCCTAGGATTCATTCATGCACTTAAGGTTAGGTTGAGAATAGGAAGCGCAACTAGGACGGACAA
5730522E02Rik	ENSMUST00000109511	CGCGGTGGTGGTACGACATGAGGAGTAGTTGGTTGTTAGGACACTATGGAGTGCCTCCAGCAGCCATAACAAAGGTTAGGTTGAGAATAGGAAGCGCAACTAGGACGGACAA
5730522E02Rik	ENSMUST00000109511	CGCGGTGGTGGTACGACATGAAGGTTAGGTTGAGAATAGGATCTGTCCTTCCTCTCTGCCCCAATTATCTCATGTGGTTTGGAGATGATAGAAGCGCAACTAGGACGGACAA
5730522E02Rik	ENSMUST00000109511	CGCGGTGGTGGTACGACATGAGATGATGTAGTAGTAAGGGTCCAGTGAGGTGAGTGGGCATCTTTATTGTGAGGAGTAGTTGGTTGTTAGGAAGCGCAACTAGGACGGACAA
5730522E02Rik	ENSMUST00000109511	CGCGGTGGTGGTACGACATGAGATGATGTAGTAGTAAGGGTTATTTGGAGAGTCGGGGCAGAGGCAGGGGAATGTGGTTTGGAGATGATAGAAGCGCAACTAGGACGGACAA
5730522E02Rik	ENSMUST00000109511	CGCGGTGGTGGTACGACATGAGGAGTAGTTGGTTGTTAGGACAATTTCTACTCTGTCCTTCCTCTCTGCCCATGTGGTTTGGAGATGATAGAAGCGCAACTAGGACGGACAA
5730522E02Rik	ENSMUST00000109511	CGCGGTGGTGGTACGACATGAAGGTTAGGTTGAGAATAGGACGTCTACTGAGAATGTTCTACAGGGATGTCAGATGATGTAGTAGTAAGGGTAGCGCAACTAGGACGGACAA
5730522E02Rik	ENSMUST00000109511	CGCGGTGGTGGTACGACATGAAGGTTAGGTTGAGAATAGGAGACTGACAGGGGCACACAGAGAAAGGTCAGAGGAGTAGTTGGTTGTTAGGAAGCGCAACTAGGACGGACAA
5730522E02Rik	ENSMUST00000109511	CGCGGTGGTGGTACGACATGATGTGGTTTGGAGATGATAGACCTCTGAAATCACTATGGAGTGCCTCCAGCAAGGTTAGGTTGAGAATAGGAAGCGCAACTAGGACGGACAA
5730522E02Rik	ENSMUST00000109511	CGCGGTGGTGGTACGACATGAGATGATGTAGTAGTAAGGGTTGCCTCCAGCAGCCATAACACTTTGAGGCCAGGAGTAGTTGGTTGTTAGGAAGCGCAACTAGGACGGACAA
5730522E02Rik	ENSMUST00000109511	CGCGGTGGTGGTACGACATGAGATGATGTAGTAGTAAGGGTTTAGATGTTCTCAGGAGGGCAATCATCTCAATGTGGTTTGGAGATGATAGAAGCGCAACTAGGACGGACAA
5730522E02Rik	ENSMUST00000109511	CGCGGTGGTGGTACGACATGAGGAGTAGTTGGTTGTTAGGAACACAGTGAGATACTTGAACATTCCAGACAATGTGGTTTGGAGATGATAGAAGCGCAACTAGGACGGACAA
5730522E02Rik	ENSMUST00000109511	CGCGGTGGTGGTACGACATGAGATGATGTAGTAGTAAGGGTGTTTTCTCTCCTGCACATAAGCACAACAAAAAGGTTAGGTTGAGAATAGGAAGCGCAACTAGGACGGACAA
5730522E02Rik	ENSMUST00000109511	CGCGGTGGTGGTACGACATGAGGAGTAGTTGGTTGTTAGGAGCAACTGAGATGTTACTCTTGAACATCCTGAAGGTTAGGTTGAGAATAGGAAGCGCAACTAGGACGGACAA
5730522E02Rik	ENSMUST00000109511	CGCGGTGGTGGTACGACATGATGTGGTTTGGAGATGATAGAGAGTGGGCATCTTTATTGTGTTGGTTTTCTAAGGTTAGGTTGAGAATAGGAAGCGCAACTAGGACGGACAA
5730522E02Rik	ENSMUST00000109511	CGCGGTGGTGGTACGACATGAGGAGTAGTTGGTTGTTAGGAAACATCCTGTCTTCTGGCAGGGTTTTCTGCAGATGATGTAGTAGTAAGGGTAGCGCAACTAGGACGGACAA
5730522E02Rik	ENSMUST00000109511	CGCGGTGGTGGTACGACATGAGATGATGTAGTAGTAAGGGTGACAGCCAGGACACAGTGAGATACTTGAACATGTGGTTTGGAGATGATAGAAGCGCAACTAGGACGGACAA
5730522E02Rik	ENSMUST00000109511	CGCGGTGGTGGTACGACATGATGTGGTTTGGAGATGATAGAGGTTTTCTGCAGCCCATATCACTAACGGAGAGGAGTAGTTGGTTGTTAGGAAGCGCAACTAGGACGGACAA
5730522E02Rik	ENSMUST00000109511	CGCGGTGGTGGTACGACATGAAGGTTAGGTTGAGAATAGGACACCTTACACATCTCATTCTGGAGTGGCAGAGATGATGTAGTAGTAAGGGTAGCGCAACTAGGACGGACAA
5730522E02Rik	ENSMUST00000109511	CGCGGTGGTGGTACGACATGAGGAGTAGTTGGTTGTTAGGAATTCATTCATGCACTTACTTCGGGACAGGAAAGGTTAGGTTGAGAATAGGAAGCGCAACTAGGACGGACAA
5730522E02Rik	ENSMUST00000109511	CGCGGTGGTGGTACGACATGAAGGTTAGGTTGAGAATAGGATCAGACATGGTGATGAGGAGAAATGAAGAAATGTGGTTTGGAGATGATAGAAGCGCAACTAGGACGGACAA
5730522E02Rik	ENSMUST00000109511	CGCGGTGGTGGTACGACATGAGATGATGTAGTAGTAAGGGTCTTTATTGTGTTGGTTTTCTCTCCTGCACAAGGAGTAGTTGGTTGTTAGGAAGCGCAACTAGGACGGACAA
5730522E02Rik	ENSMUST00000109511	CGCGGTGGTGGTACGACATGATGTGGTTTGGAGATGATAGAAGCCCATATCACTAACGGAGCCTCTTACTGAGATGATGTAGTAGTAAGGGTAGCGCAACTAGGACGGACAA
5730522E02Rik	ENSMUST00000109511	CGCGGTGGTGGTACGACATGATGTGGTTTGGAGATGATAGACTTCTACATGGCAAATTCCAGGACAGCCAGAGGAGTAGTTGGTTGTTAGGAAGCGCAACTAGGACGGACAA
5730522E02Rik	ENSMUST00000109511	CGCGGTGGTGGTACGACATGAAGGTTAGGTTGAGAATAGGACAGCAAATCTCCAGTGAGGTGAGTGGGCATAGATGATGTAGTAGTAAGGGTAGCGCAACTAGGACGGACAA
5730522E02Rik	ENSMUST00000109511	CGCGGTGGTGGTACGACATGAGGAGTAGTTGGTTGTTAGGACCTTCCTCCATCGTCTACTGAGAATGTTCTAAGGTTAGGTTGAGAATAGGAAGCGCAACTAGGACGGACAA
5730522E02Rik	ENSMUST00000109511	CGCGGTGGTGGTACGACATGAAGGTTAGGTTGAGAATAGGATTTCCCAGCAGAGAAGGACGGCAACTGAGAATGTGGTTTGGAGATGATAGAAGCGCAACTAGGACGGACAA
5730522E02Rik	ENSMUST00000109511	CGCGGTGGTGGTACGACATGAGGAGTAGTTGGTTGTTAGGAGCACAACAAACTACACACACTAGGCTTGTAAGATGATGTAGTAGTAAGGGTAGCGCAACTAGGACGGACAA
5730522E02Rik	ENSMUST00000109511	CGCGGTGGTGGTACGACATGAGATGATGTAGTAGTAAGGGTATCTCATTCTGGAGTGGCAGTTAGATGTTCATGTGGTTTGGAGATGATAGAAGCGCAACTAGGACGGACAA
5730522E02Rik	ENSMUST00000109511	CGCGGTGGTGGTACGACATGATGTGGTTTGGAGATGATAGAAATCATCTCATATGTCGGCCAGGGCGCGGGAGGAGTAGTTGGTTGTTAGGAAGCGCAACTAGGACGGACAA
5730522E02Rik	ENSMUST00000109511	CGCGGTGGTGGTACGACATGAGATGATGTAGTAGTAAGGGTGTTACTCTTGAACATCCTGTCTTCTGGCAGAAGGTTAGGTTGAGAATAGGAAGCGCAACTAGGACGGACAA
5730522E02Rik	ENSMUST00000109511	CGCGGTGGTGGTACGACATGAGGAGTAGTTGGTTGTTAGGACCCAGGAGCATTTCCCAGCAGAGAAGGACGAAGGTTAGGTTGAGAATAGGAAGCGCAACTAGGACGGACAA
5730522E02Rik	ENSMUST00000109511	CGCGGTGGTGGTACGACATGATGTGGTTTGGAGATGATAGAAGAATGCTGTCCCAGGAGCATTTCCCAGCAAAGGTTAGGTTGAGAATAGGAAGCGCAACTAGGACGGACAA
5730522E02Rik	ENSMUST00000109511	CGCGGTGGTGGTACGACATGAGATGATGTAGTAGTAAGGGTGAGAAGGACGGCAACTGAGATGTTACTCTTAGGAGTAGTTGGTTGTTAGGAAGCGCAACTAGGACGGACAA
5730522E02Rik	ENSMUST00000109511	CGCGGTGGTGGTACGACATGAGATGATGTAGTAGTAAGGGTTGTGAGTTTCAGGCCATTCTCTTCTACATGATGTGGTTTGGAGATGATAGAAGCGCAACTAGGACGGACAA
5730522E02Rik	ENSMUST00000109511	CGCGGTGGTGGTACGACATGATGTGGTTTGGAGATGATAGAAGAAGTCCAAACTGGTAGGTCCTTCCTCCAAGGAGTAGTTGGTTGTTAGGAAGCGCAACTAGGACGGACAA
5730522E02Rik	ENSMUST00000109511	CGCGGTGGTGGTACGACATGAAGGTTAGGTTGAGAATAGGACAGACAAGATAGAATGCTGTCCCAGGAGCAAGATGATGTAGTAGTAAGGGTAGCGCAACTAGGACGGACAA
5730522E02Rik	ENSMUST00000109511	CGCGGTGGTGGTACGACATGAAGGTTAGGTTGAGAATAGGACTGCACATAAGCACAACAAACTACACACACAGGAGTAGTTGGTTGTTAGGAAGCGCAACTAGGACGGACAA
5730522E02Rik	ENSMUST00000109511	CGCGGTGGTGGTACGACATGAAGGTTAGGTTGAGAATAGGATCAGGAGGGCAATCATCTCATATGTCGGCCATGTGGTTTGGAGATGATAGAAGCGCAACTAGGACGGACAA
5730522E02Rik	ENSMUST00000109511	CGCGGTGGTGGTACGACATGAGGAGTAGTTGGTTGTTAGGAACTAACGGAGCCTCTTACTGTCCTTGATCTAGATGATGTAGTAGTAAGGGTAGCGCAACTAGGACGGACAA
5730522E02Rik	ENSMUST00000109511	CGCGGTGGTGGTACGACATGATGTGGTTTGGAGATGATAGAACTGGTAGGTCCTTCCTCCATCGTCTACTGAGATGATGTAGTAGTAAGGGTAGCGCAACTAGGACGGACAA
5730522E02Rik	ENSMUST00000109511	CGCGGTGGTGGTACGACATGAGGAGTAGTTGGTTGTTAGGATTAATCTCAGTATTTGGAGAGTCGGGGCAGATGTGGTTTGGAGATGATAGAAGCGCAACTAGGACGGACAA
Acta2	ENSMUST00000039631	CGCGGTGGTGGTACGACATGATGTGGAGGGATTGAAGGATAAGCAGCGTCTCAGGGTTCCTGACAGCGACTAATAGGAAATGGTGGTAGTGTAGCGCAACTAGGACGGACAA
Acta2	ENSMUST00000039631	CGCGGTGGTGGTACGACATGAGGAGTAGTTGGTTGTTAGGACCACACGAAGCTCGTTATAGAAAGAGTGGTAATAGGAAATGGTGGTAGTGTAGCGCAACTAGGACGGACAA
Acta2	ENSMUST00000039631	CGCGGTGGTGGTACGACATGATGGGAGGATTGAGATGAGTTAAAGAGTGGTGCCAGATCTTTTCCATGTCGAATAGGAAATGGTGGTAGTGTAGCGCAACTAGGACGGACAA
Acta2	ENSMUST00000039631	CGCGGTGGTGGTACGACATGATGTGGAGGGATTGAAGGATATCCTCTTCACACATAGCTGGAGCAGCGTCTAGGAGTAGTTGGTTGTTAGGAAGCGCAACTAGGACGGACAA
Acta2	ENSMUST00000039631	CGCGGTGGTGGTACGACATGATGGGAGGATTGAGATGAGTTCCATTGTCGCACACCAGGGCTGTGCTGTCTATGTGGAGGGATTGAAGGATAAGCGCAACTAGGACGGACAA
Acta2	ENSMUST00000039631	CGCGGTGGTGGTACGACATGAGGAGTAGTTGGTTGTTAGGACACGGACAATCTCACGCTCGGCAGTAGTCAATGGGAGGATTGAGATGAGTTAGCGCAACTAGGACGGACAA
Acta2	ENSMUST00000039631	CGCGGTGGTGGTACGACATGAATAGGAAATGGTGGTAGTGTCTCACGCTCGGCAGTAGTCACGAAGGAATAATGTGGAGGGATTGAAGGATAAGCGCAACTAGGACGGACAA
Acta2	ENSMUST00000039631	CGCGGTGGTGGTACGACATGAGGAGTAGTTGGTTGTTAGGATCCAGAGGCATAGAGGGACAGCACAGCCTGAATAGGAAATGGTGGTAGTGTAGCGCAACTAGGACGGACAA
Acta2	ENSMUST00000039631	CGCGGTGGTGGTACGACATGAATAGGAAATGGTGGTAGTGTGAGTACTTGCGTTCTGGAGGGGCAATGATCATGGGAGGATTGAGATGAGTTAGCGCAACTAGGACGGACAA
Acta2	ENSMUST00000039631	CGCGGTGGTGGTACGACATGAGGAGTAGTTGGTTGTTAGGAGAATAGCCACGCTCAGTCAGGATCTTCATGATGTGGAGGGATTGAAGGATAAGCGCAACTAGGACGGACAA
Acta2	ENSMUST00000039631	CGCGGTGGTGGTACGACATGATGTGGAGGGATTGAAGGATACGTATTCCTGTTTGCTGATCCACATCTGCTATGGGAGGATTGAGATGAGTTAGCGCAACTAGGACGGACAA
Acta2	ENSMUST00000039631	CGCGGTGGTGGTACGACATGAGGAGTAGTTGGTTGTTAGGAAGCACAATACCAGTTGTACGTCCAGAGGCAATGGGAGGATTGAGATGAGTTAGCGCAACTAGGACGGACAA
Acta2	ENSMUST00000039631	CGCGGTGGTGGTACGACATGATGTGGAGGGATTGAAGGATAATAGCTGTCTTTTTGGCCCATTCCAACCATAATAGGAAATGGTGGTAGTGTAGCGCAACTAGGACGGACAA
Acta2	ENSMUST00000039631	CGCGGTGGTGGTACGACATGAGGAGTAGTTGGTTGTTAGGATGTGCTGTCTTCCTCTTCACACATAGCTGGAATAGGAAATGGTGGTAGTGTAGCGCAACTAGGACGGACAA
Acta2	ENSMUST00000039631	CGCGGTGGTGGTACGACATGAATAGGAAATGGTGGTAGTGTTCCAGAGTCCAGCACAATACCAGTTGTACGATGGGAGGATTGAGATGAGTTAGCGCAACTAGGACGGACAA
Acta2	ENSMUST00000039631	CGCGGTGGTGGTACGACATGAGGAGTAGTTGGTTGTTAGGAAGTCCAGAGCTACATAGCACAGCTTCTCCTATGTGGAGGGATTGAAGGATAAGCGCAACTAGGACGGACAA
Acta2	ENSMUST00000039631	CGCGGTGGTGGTACGACATGATGGGAGGATTGAGATGAGTTACATAGCTGGAGCAGCGTCTCAGGGTTCCTATGTGGAGGGATTGAAGGATAAGCGCAACTAGGACGGACAA
Acta2	ENSMUST00000039631	CGCGGTGGTGGTACGACATGATGGGAGGATTGAGATGAGTTCATGATGGCATGAGGCAGGGCATAGCCCTCAGGAGTAGTTGGTTGTTAGGAAGCGCAACTAGGACGGACAA
Acta2	ENSMUST00000039631	CGCGGTGGTGGTACGACATGATGTGGAGGGATTGAAGGATACCACTAGAGGGGGCCACCCTATAATAAATGAATAGGAAATGGTGGTAGTGTAGCGCAACTAGGACGGACAA
Acta2	ENSMUST00000039631	CGCGGTGGTGGTACGACATGAATAGGAAATGGTGGTAGTGTGTTCTGGAGGGGCAATGATCTTGATCTTCAAGGAGTAGTTGGTTGTTAGGAAGCGCAACTAGGACGGACAA
Acta2	ENSMUST00000039631	CGCGGTGGTGGTACGACATGAATAGGAAATGGTGGTAGTGTGGCGGCCGTGGCCATCTCATTTTCAAAGTCATGGGAGGATTGAGATGAGTTAGCGCAACTAGGACGGACAA
Acta2	ENSMUST00000039631	CGCGGTGGTGGTACGACATGAGGAGTAGTTGGTTGTTAGGAATGGCTGGAAGAGAGTCTCTGGGCAGCGGAATGTGGAGGGATTGAAGGATAAGCGCAACTAGGACGGACAA
Acta2	ENSMUST00000039631	CGCGGTGGTGGTACGACATGATGTGGAGGGATTGAAGGATAACCTGCCCGTCAGGCAGTTCGTAGCTCTTCATGGGAGGATTGAGATGAGTTAGCGCAACTAGGACGGACAA
Acta2	ENSMUST00000039631	CGCGGTGGTGGTACGACATGAGGAGTAGTTGGTTGTTAGGATCCCTCTCTTGCTCTGGGCTTCATCCCCCAATGGGAGGATTGAGATGAGTTAGCGCAACTAGGACGGACAA
Acta2	ENSMUST00000039631	CGCGGTGGTGGTACGACATGATGTGGAGGGATTGAAGGATAACGTTGTGAGTCACACCATCTCCAGAGTCCAATAGGAAATGGTGGTAGTGTAGCGCAACTAGGACGGACAA
Acta2	ENSMUST00000039631	CGCGGTGGTGGTACGACATGAATAGGAAATGGTGGTAGTGTCAGGAATGATTTGGAAAGGAACTGGAGGCGAGGAGTAGTTGGTTGTTAGGAAGCGCAACTAGGACGGACAA
Acta2	ENSMUST00000039631	CGCGGTGGTGGTACGACATGAATAGGAAATGGTGGTAGTGTTGCTGGAAGGTAGACAGCGAAGCCAGGATGATGGGAGGATTGAGATGAGTTAGCGCAACTAGGACGGACAA
Acta2	ENSMUST00000039631	CGCGGTGGTGGTACGACATGATGTGGAGGGATTGAAGGATATCACACCATCTCCAGAGTCCAGCACAATACAGGAGTAGTTGGTTGTTAGGAAGCGCAACTAGGACGGACAA
Acta2	ENSMUST00000039631	CGCGGTGGTGGTACGACATGATGGGAGGATTGAGATGAGTTGTAACAAATCAAAGCTTTGGGCAGGAATGAATGTGGAGGGATTGAAGGATAAGCGCAACTAGGACGGACAA
Acta2	ENSMUST00000039631	CGCGGTGGTGGTACGACATGAGGAGTAGTTGGTTGTTAGGAGCCAGATCTTTTCCATGTCGTCCCAGTTGGATGGGAGGATTGAGATGAGTTAGCGCAACTAGGACGGACAA
Acta2	ENSMUST00000039631	CGCGGTGGTGGTACGACATGAATAGGAAATGGTGGTAGTGTGTCCCAGTTGGTGATGATGCCGTGTTCTATATGTGGAGGGATTGAAGGATAAGCGCAACTAGGACGGACAA
Acta2	ENSMUST00000039631	CGCGGTGGTGGTACGACATGAGGAGTAGTTGGTTGTTAGGATTTTGGCCCATTCCAACCATTACTCCCTGAAATAGGAAATGGTGGTAGTGTAGCGCAACTAGGACGGACAA
Acta2	ENSMUST00000039631	CGCGGTGGTGGTACGACATGAATAGGAAATGGTGGTAGTGTACAGAGCCCAGAGCCATTGTCGCACACCAGATGGGAGGATTGAGATGAGTTAGCGCAACTAGGACGGACAA
Acta2	ENSMUST00000039631	CGCGGTGGTGGTACGACATGAGGAGTAGTTGGTTGTTAGGAGGACATTGAAGGTCTCAAACATAATCTGGGATGTGGAGGGATTGAAGGATAAGCGCAACTAGGACGGACAA
Acta2	ENSMUST00000039631	CGCGGTGGTGGTACGACATGATGTGGAGGGATTGAAGGATACTGTCAGCAGTGTCGGATGCTCTTCAGGGGATGGGAGGATTGAGATGAGTTAGCGCAACTAGGACGGACAA
Acta2	ENSMUST00000039631	CGCGGTGGTGGTACGACATGATGGGAGGATTGAGATGAGTTTAGAGGGACAGCACAGCCTGAATAGCCACAAGGAGTAGTTGGTTGTTAGGAAGCGCAACTAGGACGGACAA
Acta2	ENSMUST00000039631	CGCGGTGGTGGTACGACATGAATAGGAAATGGTGGTAGTGTGGATGCCCGCTGACTCCATCCCAATGAAAGATGTGGAGGGATTGAAGGATAAGCGCAACTAGGACGGACAA
Acta2	ENSMUST00000039631	CGCGGTGGTGGTACGACATGAGGAGTAGTTGGTTGTTAGGATCATTTTCTCCCGGTTGGCCTTAGGGTTCAAATAGGAAATGGTGGTAGTGTAGCGCAACTAGGACGGACAA
Acta2	ENSMUST00000039631	CGCGGTGGTGGTACGACATGAATAGGAAATGGTGGTAGTGTTGAGGCAGGGCATAGCCCTCATAGATAGGCATGGGAGGATTGAGATGAGTTAGCGCAACTAGGACGGACAA
Acta2	ENSMUST00000039631	CGCGGTGGTGGTACGACATGATGTGGAGGGATTGAAGGATAGCCATCTCATTTTCAAAGTCCAGAGCTACAAGGAGTAGTTGGTTGTTAGGAAGCGCAACTAGGACGGACAA
Acta2	ENSMUST00000039631	CGCGGTGGTGGTACGACATGATGGGAGGATTGAGATGAGTTAAGCTTTGGGCAGGAATGATTTGGAAAGGAATGTGGAGGGATTGAAGGATAAGCGCAACTAGGACGGACAA
Acta2	ENSMUST00000039631	CGCGGTGGTGGTACGACATGAGGAGTAGTTGGTTGTTAGGACTCTGGGCTTCATCCCCCACATAGCTGTCTATGGGAGGATTGAGATGAGTTAGCGCAACTAGGACGGACAA
Acta2	ENSMUST00000039631	CGCGGTGGTGGTACGACATGAATAGGAAATGGTGGTAGTGTAAGTCCTATACGCTCTCAAATACCCCGTTTATGTGGAGGGATTGAAGGATAAGCGCAACTAGGACGGACAA
Acta2	ENSMUST00000039631	CGCGGTGGTGGTACGACATGAATAGGAAATGGTGGTAGTGTCGTGTTCTATCGGATACTTCAGCGTCAGGAAGGAGTAGTTGGTTGTTAGGAAGCGCAACTAGGACGGACAA
Acta2	ENSMUST00000039631	CGCGGTGGTGGTACGACATGATGGGAGGATTGAGATGAGTTAGAGGCAGAGCAGGGGGGACTTAGAAGCATAATAGGAAATGGTGGTAGTGTAGCGCAACTAGGACGGACAA
Acta2	ENSMUST00000039631	CGCGGTGGTGGTACGACATGAGGAGTAGTTGGTTGTTAGGATTCATGGTGCTGGGTGCGAGGGCTGTGATCATGTGGAGGGATTGAAGGATAAGCGCAACTAGGACGGACAA
Acta2	ENSMUST00000039631	CGCGGTGGTGGTACGACATGATGTGGAGGGATTGAAGGATACATAGCCCTCATAGATAGGCACGTTGTGAGATGGGAGGATTGAGATGAGTTAGCGCAACTAGGACGGACAA
Acta2	ENSMUST00000039631	CGCGGTGGTGGTACGACATGATGGGAGGATTGAGATGAGTTGAGAGTCTCTGGGCAGCGGAAGCGTTCGTTAGGAGTAGTTGGTTGTTAGGAAGCGCAACTAGGACGGACAA
Acta2	ENSMUST00000039631	CGCGGTGGTGGTACGACATGATGTGGAGGGATTGAAGGATATCTCGGCCAGCCAAGTCCAGACGCATGATGAATAGGAAATGGTGGTAGTGTAGCGCAACTAGGACGGACAA
Acta2	ENSMUST00000039631	CGCGGTGGTGGTACGACATGAGGAGTAGTTGGTTGTTAGGAAGTGGACCTTCCTCTGTTGAAGTGATTGATAATAGGAAATGGTGGTAGTGTAGCGCAACTAGGACGGACAA
Acta2	ENSMUST00000039631	CGCGGTGGTGGTACGACATGAATAGGAAATGGTGGTAGTGTGCAGTAGTCACGAAGGAATAGCCACGCTCAATGGGAGGATTGAGATGAGTTAGCGCAACTAGGACGGACAA
Acta2	ENSMUST00000039631	CGCGGTGGTGGTACGACATGATGTGGAGGGATTGAAGGATAATAGATAGGCACGTTGTGAGTCACACCATCAGGAGTAGTTGGTTGTTAGGAAGCGCAACTAGGACGGACAA
Acta2	ENSMUST00000039631	CGCGGTGGTGGTACGACATGATGTGGAGGGATTGAAGGATAACACCAGGGCTGTGCTGTCTTCCTCTTCACATGGGAGGATTGAGATGAGTTAGCGCAACTAGGACGGACAA
Acta2	ENSMUST00000039631	CGCGGTGGTGGTACGACATGATGGGAGGATTGAGATGAGTTTTGGAAAGGAACTGGAGGCGCTGATCCACAAGGAGTAGTTGGTTGTTAGGAAGCGCAACTAGGACGGACAA
Acta2	ENSMUST00000039631	CGCGGTGGTGGTACGACATGAATAGGAAATGGTGGTAGTGTTACTCCCTGATGTCTGGGACGTCCCACGATATGTGGAGGGATTGAAGGATAAGCGCAACTAGGACGGACAA
Acta2	ENSMUST00000039631	CGCGGTGGTGGTACGACATGAATAGGAAATGGTGGTAGTGTACACAATTGAATCAGTGTTGCTAGGCCAGGAGGAGTAGTTGGTTGTTAGGAAGCGCAACTAGGACGGACAA
Acta2	ENSMUST00000039631	CGCGGTGGTGGTACGACATGATGGGAGGATTGAGATGAGTTAGTCCAGACGCATGATGGCATGAGGCAGGGAATAGGAAATGGTGGTAGTGTAGCGCAACTAGGACGGACAA
Acta2	ENSMUST00000039631	CGCGGTGGTGGTACGACATGAGGAGTAGTTGGTTGTTAGGAAGTTGTGTGCTAGAGGCAGAGCAGGGGGGAATGTGGAGGGATTGAAGGATAAGCGCAACTAGGACGGACAA
Acta2	ENSMUST00000039631	CGCGGTGGTGGTACGACATGATGGGAGGATTGAGATGAGTTAGTGATTGATGCCATCCATGCCTGGGAATAATGTGGAGGGATTGAAGGATAAGCGCAACTAGGACGGACAA
Acta2	ENSMUST00000039631	CGCGGTGGTGGTACGACATGATGGGAGGATTGAGATGAGTTCCAATGAAAGATGGCTGGAAGAGAGTCTCTAGGAGTAGTTGGTTGTTAGGAAGCGCAACTAGGACGGACAA
Acta2	ENSMUST00000039631	CGCGGTGGTGGTACGACATGATGTGGAGGGATTGAAGGATATCTTCAGGGGCCACACGAAGCTCGTTATAGAATAGGAAATGGTGGTAGTGTAGCGCAACTAGGACGGACAA
Acta2	ENSMUST00000039631	CGCGGTGGTGGTACGACATGAATAGGAAATGGTGGTAGTGTGATCCAGACAGAGTACTTGCGTTCTGGAGGAGGAGTAGTTGGTTGTTAGGAAGCGCAACTAGGACGGACAA
Acta2	ENSMUST00000039631	CGCGGTGGTGGTACGACATGATGGGAGGATTGAGATGAGTTGTCCCACGATGGATGGGAAAACAGCCCTGGAATAGGAAATGGTGGTAGTGTAGCGCAACTAGGACGGACAA
Acta2	ENSMUST00000039631	CGCGGTGGTGGTACGACATGAGGAGTAGTTGGTTGTTAGGAGCATATCCATGCACGTGTGTATGCTTTAATATGTGGAGGGATTGAAGGATAAGCGCAACTAGGACGGACAA
Acta2	ENSMUST00000039631	CGCGGTGGTGGTACGACATGATGGGAGGATTGAGATGAGTTATAATCTGGGTCATTTTCTCCCGGTTGGCCATGTGGAGGGATTGAAGGATAAGCGCAACTAGGACGGACAA
Acta2	ENSMUST00000039631	CGCGGTGGTGGTACGACATGAGGAGTAGTTGGTTGTTAGGACATCCCCCACATAGCTGTCTTTTTGGCCCAATGGGAGGATTGAGATGAGTTAGCGCAACTAGGACGGACAA
Acta2	ENSMUST00000039631	CGCGGTGGTGGTACGACATGAATAGGAAATGGTGGTAGTGTCTAGGCCAGGGCTACAAGTTAAGGGTAGCAATGTGGAGGGATTGAAGGATAAGCGCAACTAGGACGGACAA
Acta2	ENSMUST00000039631	CGCGGTGGTGGTACGACATGAGGAGTAGTTGGTTGTTAGGAATCAGTGTTGCTAGGCCAGGGCTACAAGTTAATAGGAAATGGTGGTAGTGTAGCGCAACTAGGACGGACAA
Acta2	ENSMUST00000039631	CGCGGTGGTGGTACGACATGATGGGAGGATTGAGATGAGTTTTCATGAGGTAGTCGGTGAGATCTCGGCCAAATAGGAAATGGTGGTAGTGTAGCGCAACTAGGACGGACAA
Acta2	ENSMUST00000039631	CGCGGTGGTGGTACGACATGATGTGGAGGGATTGAAGGATAGGTGGTACCCCCTGACAGGACGTTGTTAGCAGGAGTAGTTGGTTGTTAGGAAGCGCAACTAGGACGGACAA
Acta2	ENSMUST00000039631	CGCGGTGGTGGTACGACATGATGTGGAGGGATTGAAGGATAGGGCAGCGGAAGCGTTCGTTTCCAATGGTGATGGGAGGATTGAGATGAGTTAGCGCAACTAGGACGGACAA
Acta2	ENSMUST00000039631	CGCGGTGGTGGTACGACATGATGGGAGGATTGAGATGAGTTTGTCGGATGCTCTTCAGGGGCCACACGAAGAGGAGTAGTTGGTTGTTAGGAAGCGCAACTAGGACGGACAA
Acta2	ENSMUST00000039631	CGCGGTGGTGGTACGACATGAATAGGAAATGGTGGTAGTGTGCTACAAGTTAAGGGTAGCACATGTCTGATATGTGGAGGGATTGAAGGATAAGCGCAACTAGGACGGACAA
Acta2	ENSMUST00000039631	CGCGGTGGTGGTACGACATGAATAGGAAATGGTGGTAGTGTCTGGGTACATGGTGGTACCCCCTGACAGGAAGGAGTAGTTGGTTGTTAGGAAGCGCAACTAGGACGGACAA
Acta2	ENSMUST00000039631	CGCGGTGGTGGTACGACATGAATAGGAAATGGTGGTAGTGTCACTCTAGCTGTGAAGTCAGTGTCGATTTTATGGGAGGATTGAGATGAGTTAGCGCAACTAGGACGGACAA
Acta2	ENSMUST00000039631	CGCGGTGGTGGTACGACATGAGGAGTAGTTGGTTGTTAGGATGACTCCATCCCAATGAAAGATGGCTGGAAATGTGGAGGGATTGAAGGATAAGCGCAACTAGGACGGACAA
Acta2	ENSMUST00000039631	CGCGGTGGTGGTACGACATGATGTGGAGGGATTGAAGGATACCAGCTTCGTCGTATTCCTGTTTGCTGATCATGGGAGGATTGAGATGAGTTAGCGCAACTAGGACGGACAA
Acta2	ENSMUST00000039631	CGCGGTGGTGGTACGACATGATGGGAGGATTGAGATGAGTTACTGGAGGCGCTGATCCACAAAACGTTCACAGGAGTAGTTGGTTGTTAGGAAGCGCAACTAGGACGGACAA
Acta2	ENSMUST00000039631	CGCGGTGGTGGTACGACATGAATAGGAAATGGTGGTAGTGTCTATTCCTGACCACTAGAGGGGGCCACCCTATGTGGAGGGATTGAAGGATAAGCGCAACTAGGACGGACAA
Acta2	ENSMUST00000039631	CGCGGTGGTGGTACGACATGAGGAGTAGTTGGTTGTTAGGAGATGGAGGGCCCAGCTTCGTCGTATTCCTGAATAGGAAATGGTGGTAGTGTAGCGCAACTAGGACGGACAA
Acta2	ENSMUST00000039631	CGCGGTGGTGGTACGACATGAATAGGAAATGGTGGTAGTGTAGCGTCAGGATCCCTCTCTTGCTCTGGGCTATGGGAGGATTGAGATGAGTTAGCGCAACTAGGACGGACAA
Acta2	ENSMUST00000039631	CGCGGTGGTGGTACGACATGAGGAGTAGTTGGTTGTTAGGATGTCTGGGACGTCCCACGATGGATGGGAAAATGTGGAGGGATTGAAGGATAAGCGCAACTAGGACGGACAA
Acta2	ENSMUST00000039631	CGCGGTGGTGGTACGACATGATGGGAGGATTGAGATGAGTTGCACAGCTTCTCCTTGATGTCACGGACAATATGTGGAGGGATTGAAGGATAAGCGCAACTAGGACGGACAA
Acta2	ENSMUST00000039631	CGCGGTGGTGGTACGACATGATGGGAGGATTGAGATGAGTTTCATCACCAGCGAAGCCGGCCTTACAGAGCAGGAGTAGTTGGTTGTTAGGAAGCGCAACTAGGACGGACAA
Acta2	ENSMUST00000039631	CGCGGTGGTGGTACGACATGATGTGGAGGGATTGAAGGATAGTGAAGTCAGTGTCGATTTTTCCTATTGGTAATAGGAAATGGTGGTAGTGTAGCGCAACTAGGACGGACAA
Acta2	ENSMUST00000039631	CGCGGTGGTGGTACGACATGAATAGGAAATGGTGGTAGTGTAAACGTTCACAGTTGTGTGCTAGAGGCAGAAGGAGTAGTTGGTTGTTAGGAAGCGCAACTAGGACGGACAA
Acta2	ENSMUST00000039631	CGCGGTGGTGGTACGACATGAATAGGAAATGGTGGTAGTGTCCTGACAGGACGTTGTTAGCATAGAGATCCATGGGAGGATTGAGATGAGTTAGCGCAACTAGGACGGACAA
Acta2	ENSMUST00000039631	CGCGGTGGTGGTACGACATGATGTGGAGGGATTGAAGGATACGCTCTCAAATACCCCGTTTACATCATTTAAGGAGTAGTTGGTTGTTAGGAAGCGCAACTAGGACGGACAA
Acta2	ENSMUST00000039631	CGCGGTGGTGGTACGACATGATGGGAGGATTGAGATGAGTTTGTGTCACATCTATTCCTGACCACTAGAGGATGTGGAGGGATTGAAGGATAAGCGCAACTAGGACGGACAA
Acta2	ENSMUST00000039631	CGCGGTGGTGGTACGACATGATGGGAGGATTGAGATGAGTTCTTAGGGTTCAGTGGTGCCTCTGTCAGCAGAGGAGTAGTTGGTTGTTAGGAAGCGCAACTAGGACGGACAA
Acta2	ENSMUST00000039631	CGCGGTGGTGGTACGACATGATGTGGAGGGATTGAAGGATAAGTGGTGCCTCTGTCAGCAGTGTCGGATGCAATAGGAAATGGTGGTAGTGTAGCGCAACTAGGACGGACAA
Acta2	ENSMUST00000039631	CGCGGTGGTGGTACGACATGAATAGGAAATGGTGGTAGTGTCAGGCAGTTCGTAGCTCTTCTCCAGGGAGGAGGAGTAGTTGGTTGTTAGGAAGCGCAACTAGGACGGACAA
Adam2	ENSMUST00000022618	CGCGGTGGTGGTACGACATGATGAAAGGAATGGGTTGTGGTTCCCTTGATAGGTAGCGCCAACATAATCGGATGTGATGGAAGTTAGAGGGTAGCGCAACTAGGACGGACAA
Adam2	ENSMUST00000022618	CGCGGTGGTGGTACGACATGAGGGTGGTTTAGTGTGTGTTTTCATCTTGGGCAAGCCTGCAAACCTCCCCTATGTGATGGAAGTTAGAGGGTAGCGCAACTAGGACGGACAA
Adam2	ENSMUST00000022618	CGCGGTGGTGGTACGACATGAAGTGTGGGATTGATGAGATAGGTAGCGCCAACATAATCGGTAGTGTTCCTATGTGATGGAAGTTAGAGGGTAGCGCAACTAGGACGGACAA
Adam2	ENSMUST00000022618	CGCGGTGGTGGTACGACATGAGGGTGGTTTAGTGTGTGTTTACAGCTCCCAGATATGTCGCTCTTGGAATTATGAAAGGAATGGGTTGTGGTAGCGCAACTAGGACGGACAA
Adam2	ENSMUST00000022618	CGCGGTGGTGGTACGACATGAAGTGTGGGATTGATGAGATAGCATAGTTCTTGTCACACATCTTCCCTTGAATGAAAGGAATGGGTTGTGGTAGCGCAACTAGGACGGACAA
Adam2	ENSMUST00000022618	CGCGGTGGTGGTACGACATGAAGTGTGGGATTGATGAGATAGAGGTTCAATTCCATAGCTAACGTTTCCAAAGGGTGGTTTAGTGTGTGTTTAGCGCAACTAGGACGGACAA
Adam2	ENSMUST00000022618	CGCGGTGGTGGTACGACATGATGTGATGGAAGTTAGAGGGTCCTTCTTTCCACAGTCGCAAATTTCATCTTATGAAAGGAATGGGTTGTGGTAGCGCAACTAGGACGGACAA
Adam2	ENSMUST00000022618	CGCGGTGGTGGTACGACATGAGGGTGGTTTAGTGTGTGTTTAATACAGATCCACTTGCGATTGTCACATGGATGTGATGGAAGTTAGAGGGTAGCGCAACTAGGACGGACAA
Adam2	ENSMUST00000022618	CGCGGTGGTGGTACGACATGATGTGATGGAAGTTAGAGGGTGATAGCATTTGCCAGTCCAATCAACTGGAAAAGTGTGGGATTGATGAGATAAGCGCAACTAGGACGGACAA
Adam2	ENSMUST00000022618	CGCGGTGGTGGTACGACATGAGGGTGGTTTAGTGTGTGTTTAGACCACGATATGCAGGCTTGACTTTCAGGATGAAAGGAATGGGTTGTGGTAGCGCAACTAGGACGGACAA
Adam2	ENSMUST00000022618	CGCGGTGGTGGTACGACATGAAGTGTGGGATTGATGAGATAGGGTTCATCACGCAGACAGGTACGCCACACATGAAAGGAATGGGTTGTGGTAGCGCAACTAGGACGGACAA
Adam2	ENSMUST00000022618	CGCGGTGGTGGTACGACATGAGGGTGGTTTAGTGTGTGTTTCGATCCGCTGTGGCTTGATACTTCGTATCTAAGTGTGGGATTGATGAGATAAGCGCAACTAGGACGGACAA
Adam2	ENSMUST00000022618	CGCGGTGGTGGTACGACATGATGAAAGGAATGGGTTGTGGTCCACTCTGACAGGTGCCGTTAATACAGATCATGTGATGGAAGTTAGAGGGTAGCGCAACTAGGACGGACAA
Adam2	ENSMUST00000022618	CGCGGTGGTGGTACGACATGAGGGTGGTTTAGTGTGTGTTTTATGATTTCTGGCCTGATGGAGACCACGATATGTGATGGAAGTTAGAGGGTAGCGCAACTAGGACGGACAA
Adam2	ENSMUST00000022618	CGCGGTGGTGGTACGACATGATGTGATGGAAGTTAGAGGGTGCTTGAGAAGTCATCCATTCTCCATTTCATAAGTGTGGGATTGATGAGATAAGCGCAACTAGGACGGACAA
Adam2	ENSMUST00000022618	CGCGGTGGTGGTACGACATGATGAAAGGAATGGGTTGTGGTATAAACTTGGAAAAGTCCTCCATGCTGCAGAGGGTGGTTTAGTGTGTGTTTAGCGCAACTAGGACGGACAA
Adam2	ENSMUST00000022618	CGCGGTGGTGGTACGACATGAAGTGTGGGATTGATGAGATATCGATTTTGAGATTGTAGGTCACCTGTGTTATGAAAGGAATGGGTTGTGGTAGCGCAACTAGGACGGACAA
Adam2	ENSMUST00000022618	CGCGGTGGTGGTACGACATGAAGTGTGGGATTGATGAGATAACATAATCGGTAGTGTTCCTGTAGACGAGTAGGGTGGTTTAGTGTGTGTTTAGCGCAACTAGGACGGACAA
Adam2	ENSMUST00000022618	CGCGGTGGTGGTACGACATGATGAAAGGAATGGGTTGTGGTTGACAATGGCTGTATCAGCCCCGATATGCTATGTGATGGAAGTTAGAGGGTAGCGCAACTAGGACGGACAA
Adam2	ENSMUST00000022618	CGCGGTGGTGGTACGACATGATGTGATGGAAGTTAGAGGGTAGGTACGACTGTTTCCACTTCAGGAACCTGAGGGTGGTTTAGTGTGTGTTTAGCGCAACTAGGACGGACAA
Adam2	ENSMUST00000022618	CGCGGTGGTGGTACGACATGAAGTGTGGGATTGATGAGATATGGCTTGATACTTCGTATCTTATACTGCGAATGTGATGGAAGTTAGAGGGTAGCGCAACTAGGACGGACAA
Adam2	ENSMUST00000022618	CGCGGTGGTGGTACGACATGATGAAAGGAATGGGTTGTGGTCGCAGACGGTTCCATCTCTCACCCACATCTAGGGTGGTTTAGTGTGTGTTTAGCGCAACTAGGACGGACAA
Adam2	ENSMUST00000022618	CGCGGTGGTGGTACGACATGATGAAAGGAATGGGTTGTGGTCAGCATCCCAATCAGGACAAGGATCACAACAAGTGTGGGATTGATGAGATAAGCGCAACTAGGACGGACAA
Adam2	ENSMUST00000022618	CGCGGTGGTGGTACGACATGAGGGTGGTTTAGTGTGTGTTTTTGTGACATTGTGGAATCTGTCCAGACTAGAAGTGTGGGATTGATGAGATAAGCGCAACTAGGACGGACAA
Adam2	ENSMUST00000022618	CGCGGTGGTGGTACGACATGATGAAAGGAATGGGTTGTGGTGGAGACTTGGAGCGGTAAGCACTTGCAATGATGTGATGGAAGTTAGAGGGTAGCGCAACTAGGACGGACAA
Adam2	ENSMUST00000022618	CGCGGTGGTGGTACGACATGATGTGATGGAAGTTAGAGGGTTTGTAAGATGGCTGTAGCCGTGGCTGGTTCAGGGTGGTTTAGTGTGTGTTTAGCGCAACTAGGACGGACAA
Adam2	ENSMUST00000022618	CGCGGTGGTGGTACGACATGATGTGATGGAAGTTAGAGGGTTCTGTCCACTGAAGAGAATTACTTGTGACAAAGTGTGGGATTGATGAGATAAGCGCAACTAGGACGGACAA
Adam2	ENSMUST00000022618	CGCGGTGGTGGTACGACATGAGGGTGGTTTAGTGTGTGTTTGCAGACATGCCCGCTTATATTGGCATAAATATGAAAGGAATGGGTTGTGGTAGCGCAACTAGGACGGACAA
Adam2	ENSMUST00000022618	CGCGGTGGTGGTACGACATGATGAAAGGAATGGGTTGTGGTCTGGCAAACCTTATTTGACCCGCAGACGGTAAGTGTGGGATTGATGAGATAAGCGCAACTAGGACGGACAA
Adam2	ENSMUST00000022618	CGCGGTGGTGGTACGACATGAAGTGTGGGATTGATGAGATATTCTCTGGCACTGTGACTTGCACGTGTAATAGGGTGGTTTAGTGTGTGTTTAGCGCAACTAGGACGGACAA
Adam2	ENSMUST00000022618	CGCGGTGGTGGTACGACATGATGTGATGGAAGTTAGAGGGTAAACATTCACTTGAACCAAAGCCTGCATCGATGAAAGGAATGGGTTGTGGTAGCGCAACTAGGACGGACAA
Adam2	ENSMUST00000022618	CGCGGTGGTGGTACGACATGAGGGTGGTTTAGTGTGTGTTTCACCTGTGTTTCGTAGCCATTGCTTGTGACATGTGATGGAAGTTAGAGGGTAGCGCAACTAGGACGGACAA
Adam2	ENSMUST00000022618	CGCGGTGGTGGTACGACATGAAGTGTGGGATTGATGAGATATGTTAGCATCGCCTGTGGTCAAGATTTTGTATGTGATGGAAGTTAGAGGGTAGCGCAACTAGGACGGACAA
Adam2	ENSMUST00000022618	CGCGGTGGTGGTACGACATGAGGGTGGTTTAGTGTGTGTTTCAGCTCCCAGAAACATTCACTTGAACCAAAATGAAAGGAATGGGTTGTGGTAGCGCAACTAGGACGGACAA
Adam2	ENSMUST00000022618	CGCGGTGGTGGTACGACATGATGAAAGGAATGGGTTGTGGTACTCTAAAGTTGGGAGGCAAGAACGGTTTTAAGTGTGGGATTGATGAGATAAGCGCAACTAGGACGGACAA
Adam2	ENSMUST00000022618	CGCGGTGGTGGTACGACATGAGGGTGGTTTAGTGTGTGTTTATCACGTGTTCAAAACCACTGGAAGATTCCAAGTGTGGGATTGATGAGATAAGCGCAACTAGGACGGACAA
Adam2	ENSMUST00000022618	CGCGGTGGTGGTACGACATGATGAAAGGAATGGGTTGTGGTTGGGAGGCAAGAACGGTTTTTGCATTAGGTATGTGATGGAAGTTAGAGGGTAGCGCAACTAGGACGGACAA
Adam2	ENSMUST00000022618	CGCGGTGGTGGTACGACATGATGTGATGGAAGTTAGAGGGTGGATCACAACGTAGAAAGGGATGATCAAGAAGGGTGGTTTAGTGTGTGTTTAGCGCAACTAGGACGGACAA
Adam2	ENSMUST00000022618	CGCGGTGGTGGTACGACATGATGTGATGGAAGTTAGAGGGTAATGGAGAGATATGATTTCTGGCCTGATGGAAGTGTGGGATTGATGAGATAAGCGCAACTAGGACGGACAA
Adam2	ENSMUST00000022618	CGCGGTGGTGGTACGACATGATGAAAGGAATGGGTTGTGGTTATCAATGCTCCCGCCAGGATATGAATCTTAGGGTGGTTTAGTGTGTGTTTAGCGCAACTAGGACGGACAA
Adam2	ENSMUST00000022618	CGCGGTGGTGGTACGACATGAAGTGTGGGATTGATGAGATAGAAAGGGATGATCAAGAAAAATGGCCACCGATGAAAGGAATGGGTTGTGGTAGCGCAACTAGGACGGACAA
Adam2	ENSMUST00000022618	CGCGGTGGTGGTACGACATGAGGGTGGTTTAGTGTGTGTTTAAAAACGCCATATCATGTGGTCGCAGAACAAAGTGTGGGATTGATGAGATAAGCGCAACTAGGACGGACAA
Adam2	ENSMUST00000022618	CGCGGTGGTGGTACGACATGATGAAAGGAATGGGTTGTGGTATACGCTAGCCCCATGCTGAGGCTCAGCAGATGTGATGGAAGTTAGAGGGTAGCGCAACTAGGACGGACAA
Adam2	ENSMUST00000022618	CGCGGTGGTGGTACGACATGAGGGTGGTTTAGTGTGTGTTTCATCCATTCTCCATTTCATCCTTTGGGAATATGTGATGGAAGTTAGAGGGTAGCGCAACTAGGACGGACAA
Adam2	ENSMUST00000022618	CGCGGTGGTGGTACGACATGATGTGATGGAAGTTAGAGGGTGGACCGGATTTTCTCTGGCACTGTGACTTGAAGTGTGGGATTGATGAGATAAGCGCAACTAGGACGGACAA
Adam2	ENSMUST00000022618	CGCGGTGGTGGTACGACATGAGGGTGGTTTAGTGTGTGTTTCATGCTGCAGTTACTGAAGGCCCGGACACCATGAAAGGAATGGGTTGTGGTAGCGCAACTAGGACGGACAA
Adam2	ENSMUST00000022618	CGCGGTGGTGGTACGACATGAAGTGTGGGATTGATGAGATACCTTCTCGGCGTAGAGTAATGCACCTCCTTATGAAAGGAATGGGTTGTGGTAGCGCAACTAGGACGGACAA
Adam2	ENSMUST00000022618	CGCGGTGGTGGTACGACATGAAGTGTGGGATTGATGAGATACTTTGGGAATAGACTTTTACCAGCATCCCAAGGGTGGTTTAGTGTGTGTTTAGCGCAACTAGGACGGACAA
Adam2	ENSMUST00000022618	CGCGGTGGTGGTACGACATGATGAAAGGAATGGGTTGTGGTTATCCCCCAGCAGAGATTCCACAGCTCCCAATGTGATGGAAGTTAGAGGGTAGCGCAACTAGGACGGACAA
Adam2	ENSMUST00000022618	CGCGGTGGTGGTACGACATGATGTGATGGAAGTTAGAGGGTTAGAGCAACTTGTTAGCATCGCCTGTGGTCAGGGTGGTTTAGTGTGTGTTTAGCGCAACTAGGACGGACAA
Adam2	ENSMUST00000022618	CGCGGTGGTGGTACGACATGATGTGATGGAAGTTAGAGGGTAGCCCTTTCCTTGTTGCCACTATCAATGCTAAGTGTGGGATTGATGAGATAAGCGCAACTAGGACGGACAA
Adam2	ENSMUST00000022618	CGCGGTGGTGGTACGACATGATGAAAGGAATGGGTTGTGGTTTGAACCAAAGCCTGCATCGATGCCAAATAAGGGTGGTTTAGTGTGTGTTTAGCGCAACTAGGACGGACAA
Adam2	ENSMUST00000022618	CGCGGTGGTGGTACGACATGAAGTGTGGGATTGATGAGATACACTTCGGATGTGCCGTTGCAGTACTCTGTATGAAAGGAATGGGTTGTGGTAGCGCAACTAGGACGGACAA
Adam2	ENSMUST00000022618	CGCGGTGGTGGTACGACATGAGGGTGGTTTAGTGTGTGTTTTCCATCCAAAATTCCAGGGAAGACAGAATTAAGTGTGGGATTGATGAGATAAGCGCAACTAGGACGGACAA
Adam2	ENSMUST00000022618	CGCGGTGGTGGTACGACATGATGTGATGGAAGTTAGAGGGTCAACTGGAAAATCTTTTGAGTGACAATGGCATGAAAGGAATGGGTTGTGGTAGCGCAACTAGGACGGACAA
Adam2	ENSMUST00000022618	CGCGGTGGTGGTACGACATGAGGGTGGTTTAGTGTGTGTTTCCCGCCAGGATATGAATCTTTCATTCTTTTATGTGATGGAAGTTAGAGGGTAGCGCAACTAGGACGGACAA
Adam2	ENSMUST00000022618	CGCGGTGGTGGTACGACATGATGTGATGGAAGTTAGAGGGTTCACACATCTTCCCTTGATAGGTAGCGCCAAAGTGTGGGATTGATGAGATAAGCGCAACTAGGACGGACAA
Adam2	ENSMUST00000022618	CGCGGTGGTGGTACGACATGAGGGTGGTTTAGTGTGTGTTTTTCTCACGAGTGCCTTCTGTTTGGGACTGGATGAAAGGAATGGGTTGTGGTAGCGCAACTAGGACGGACAA
Adam2	ENSMUST00000022618	CGCGGTGGTGGTACGACATGATGAAAGGAATGGGTTGTGGTTGAAACTTCTGCTCAAGAGACCTCATGATTAAGTGTGGGATTGATGAGATAAGCGCAACTAGGACGGACAA
Adam2	ENSMUST00000022618	CGCGGTGGTGGTACGACATGAAGTGTGGGATTGATGAGATATAGTGTTCCTGTAGACGAGTAAAAACGCCAAGGGTGGTTTAGTGTGTGTTTAGCGCAACTAGGACGGACAA
Adam2	ENSMUST00000022618	CGCGGTGGTGGTACGACATGATGTGATGGAAGTTAGAGGGTATGGCCACCGTGGAGACTTGGAGCGGTAAGATGAAAGGAATGGGTTGTGGTAGCGCAACTAGGACGGACAA
Adam2	ENSMUST00000022618	CGCGGTGGTGGTACGACATGATGTGATGGAAGTTAGAGGGTTTGCAAGTGATTCCAGAGTTACGGCTTTGGAGGGTGGTTTAGTGTGTGTTTAGCGCAACTAGGACGGACAA
Adam2	ENSMUST00000022618	CGCGGTGGTGGTACGACATGAAGTGTGGGATTGATGAGATAGTAGAGTAATGCACCTCCTTTCTCAGGTTCATGTGATGGAAGTTAGAGGGTAGCGCAACTAGGACGGACAA
Adam2	ENSMUST00000022618	CGCGGTGGTGGTACGACATGATGAAAGGAATGGGTTGTGGTATGCCAAATAGATCCTGGCACTGCTGTTCTAGGGTGGTTTAGTGTGTGTTTAGCGCAACTAGGACGGACAA
Adam2	ENSMUST00000022618	CGCGGTGGTGGTACGACATGATGAAAGGAATGGGTTGTGGTATCTTTTGAGTGACAATGGCTGTATCAGCCAAGTGTGGGATTGATGAGATAAGCGCAACTAGGACGGACAA
Adam2	ENSMUST00000022618	CGCGGTGGTGGTACGACATGAAGTGTGGGATTGATGAGATATCTCAGGTTCCACTTGGTAGATCACGTGTTAGGGTGGTTTAGTGTGTGTTTAGCGCAACTAGGACGGACAA
Adam2	ENSMUST00000022618	CGCGGTGGTGGTACGACATGATGTGATGGAAGTTAGAGGGTGTCACAGTGGCAGTTCTTCTTGTTATTACAATGAAAGGAATGGGTTGTGGTAGCGCAACTAGGACGGACAA
Adam2	ENSMUST00000022618	CGCGGTGGTGGTACGACATGAGGGTGGTTTAGTGTGTGTTTTTGTTGCCACTATCAATGCTCCCGCCAGGAATGTGATGGAAGTTAGAGGGTAGCGCAACTAGGACGGACAA
Adam2	ENSMUST00000022618	CGCGGTGGTGGTACGACATGATGTGATGGAAGTTAGAGGGTAATTGGAGAAAACCCCTGAGTCCAGTACATAAGTGTGGGATTGATGAGATAAGCGCAACTAGGACGGACAA
Adam2	ENSMUST00000022618	CGCGGTGGTGGTACGACATGAGGGTGGTTTAGTGTGTGTTTCACGTGTAATTTCTCACGAGTGCCTTCTGTATGAAAGGAATGGGTTGTGGTAGCGCAACTAGGACGGACAA
Adam2	ENSMUST00000022618	CGCGGTGGTGGTACGACATGAAGTGTGGGATTGATGAGATATCACGTCGTCATACGCTAGCCCCATGCTGAATGAAAGGAATGGGTTGTGGTAGCGCAACTAGGACGGACAA
Adam2	ENSMUST00000022618	CGCGGTGGTGGTACGACATGAGGGTGGTTTAGTGTGTGTTTCCGATATGCTCAAACATTTGCTTTTCAACGAAGTGTGGGATTGATGAGATAAGCGCAACTAGGACGGACAA
Adam2	ENSMUST00000022618	CGCGGTGGTGGTACGACATGATGTGATGGAAGTTAGAGGGTTTCCAGAGTTACGGCTTTGGGGTGCAAAGCATGAAAGGAATGGGTTGTGGTAGCGCAACTAGGACGGACAA
Adam2	ENSMUST00000022618	CGCGGTGGTGGTACGACATGATGTGATGGAAGTTAGAGGGTAACTCCTCCTGCATAGTTCTTGTCACACATAGGGTGGTTTAGTGTGTGTTTAGCGCAACTAGGACGGACAA
Adam2	ENSMUST00000022618	CGCGGTGGTGGTACGACATGAAGTGTGGGATTGATGAGATATCCACCTCTCCATTCCCACAGACCGCCATCATGTGATGGAAGTTAGAGGGTAGCGCAACTAGGACGGACAA
Adam2	ENSMUST00000022618	CGCGGTGGTGGTACGACATGATGAAAGGAATGGGTTGTGGTCCAAGGTGTATGTTTTCCCTTCGATTTTGAAGGGTGGTTTAGTGTGTGTTTAGCGCAACTAGGACGGACAA
Adam2	ENSMUST00000022618	CGCGGTGGTGGTACGACATGATGAAAGGAATGGGTTGTGGTGTTTCCACTTCAGGAACCTGTAGAGCAACTAAGTGTGGGATTGATGAGATAAGCGCAACTAGGACGGACAA
Adam2	ENSMUST00000022618	CGCGGTGGTGGTACGACATGAAGTGTGGGATTGATGAGATAGCATTCCTTGTATCCCCCAGCAGAGATTCCAGGGTGGTTTAGTGTGTGTTTAGCGCAACTAGGACGGACAA
Adam2	ENSMUST00000022618	CGCGGTGGTGGTACGACATGATGAAAGGAATGGGTTGTGGTGCCTGTGGTCAAGATTTTGTTTTCATCCATATGTGATGGAAGTTAGAGGGTAGCGCAACTAGGACGGACAA
Adam2	ENSMUST00000022618	CGCGGTGGTGGTACGACATGATGTGATGGAAGTTAGAGGGTTGGGACTGGCTAAGGCCGCCAAGTTCACTCAGGGTGGTTTAGTGTGTGTTTAGCGCAACTAGGACGGACAA
Adam2	ENSMUST00000022618	CGCGGTGGTGGTACGACATGAAGTGTGGGATTGATGAGATATGCATTAGGTCCAAGGTGTATGTTTTCCCTATGTGATGGAAGTTAGAGGGTAGCGCAACTAGGACGGACAA
Adam2	ENSMUST00000022618	CGCGGTGGTGGTACGACATGAGGGTGGTTTAGTGTGTGTTTCCGCTTATATTGGCATAAATAACAGTGGCAATGAAAGGAATGGGTTGTGGTAGCGCAACTAGGACGGACAA
Adam2	ENSMUST00000022618	CGCGGTGGTGGTACGACATGATGAAAGGAATGGGTTGTGGTAGTATGTGGGGTCACAGTGGCAGTTCTTCTAAGTGTGGGATTGATGAGATAAGCGCAACTAGGACGGACAA
Adam2	ENSMUST00000022618	CGCGGTGGTGGTACGACATGAGGGTGGTTTAGTGTGTGTTTTGGGGATATTCCAGGGAAACGCAGACATGCAAGTGTGGGATTGATGAGATAAGCGCAACTAGGACGGACAA
Adam2	ENSMUST00000022618	CGCGGTGGTGGTACGACATGATGAAAGGAATGGGTTGTGGTGATATGTCGCTCTTGGAATTCAGCTCCCAGATGTGATGGAAGTTAGAGGGTAGCGCAACTAGGACGGACAA
Adam2	ENSMUST00000022618	CGCGGTGGTGGTACGACATGAGGGTGGTTTAGTGTGTGTTTCTGCTACACATTTTTGATTCTGGCAAACCTATGTGATGGAAGTTAGAGGGTAGCGCAACTAGGACGGACAA
Adam2	ENSMUST00000022618	CGCGGTGGTGGTACGACATGATGTGATGGAAGTTAGAGGGTCTGCTGTTCTCCACTCTGACAGGTGCCGTTAAGTGTGGGATTGATGAGATAAGCGCAACTAGGACGGACAA
Adam2	ENSMUST00000022618	CGCGGTGGTGGTACGACATGATGAAAGGAATGGGTTGTGGTTTTCCAGGTTGCAATCATAGCCCAAGAAAGAGGGTGGTTTAGTGTGTGTTTAGCGCAACTAGGACGGACAA
Adam2	ENSMUST00000022618	CGCGGTGGTGGTACGACATGATGAAAGGAATGGGTTGTGGTTCCAGACTAGTCTTTGGATTCACTTTCACTAAGTGTGGGATTGATGAGATAAGCGCAACTAGGACGGACAA
Adam2	ENSMUST00000022618	CGCGGTGGTGGTACGACATGAAGTGTGGGATTGATGAGATACCCAAGAAAGTGTCTGCTACACATTTTTGAAGGGTGGTTTAGTGTGTGTTTAGCGCAACTAGGACGGACAA
Adam2	ENSMUST00000022618	CGCGGTGGTGGTACGACATGATGTGATGGAAGTTAGAGGGTTCACTTTCAAATTGCTCTTCGCTTGAGAAGATGAAAGGAATGGGTTGTGGTAGCGCAACTAGGACGGACAA
Adam2	ENSMUST00000022618	CGCGGTGGTGGTACGACATGAGGGTGGTTTAGTGTGTGTTTAAAAGTCCTCCATGCTGCAGTTACTGAAGGATGTGATGGAAGTTAGAGGGTAGCGCAACTAGGACGGACAA
Adamts2	ENSMUST00000040523	CGCGGTGGTGGTACGACATGAGGAGTAGTTGGTTGTTAGGATGGGGACTGGTCATCATCAAGGAAATGAAGATGTGGAGGGATTGAAGGATAAGCGCAACTAGGACGGACAA
Adamts2	ENSMUST00000040523	CGCGGTGGTGGTACGACATGATGTGGAGGGATTGAAGGATATCTTCCAGGACATTGTTGTCGTCAACATTGAAGGAGGAGGGTAATGATAGAAGCGCAACTAGGACGGACAA
Adamts2	ENSMUST00000040523	CGCGGTGGTGGTACGACATGAGAGATTAGAGATGAGTTGGAACTTTCCTGCAGTCCCCACGCACACACAGGATGTGGAGGGATTGAAGGATAAGCGCAACTAGGACGGACAA
Adamts2	ENSMUST00000040523	CGCGGTGGTGGTACGACATGAAGGAGGAGGGTAATGATAGAGTTCAAGGTCATTGGGATTAAAGGTGTGGTAGGAGTAGTTGGTTGTTAGGAAGCGCAACTAGGACGGACAA
Adamts2	ENSMUST00000040523	CGCGGTGGTGGTACGACATGAGAGATTAGAGATGAGTTGGATTGGGAGTGGGCGGTCGGCGATATACCACAAGGAGTAGTTGGTTGTTAGGAAGCGCAACTAGGACGGACAA
Adamts2	ENSMUST00000040523	CGCGGTGGTGGTACGACATGAGAGATTAGAGATGAGTTGGATTGTAGTCATCGTCCGTGGCATGCCTGCGCAAGGAGGAGGGTAATGATAGAAGCGCAACTAGGACGGACAA
Adamts2	ENSMUST00000040523	CGCGGTGGTGGTACGACATGAGGAGTAGTTGGTTGTTAGGATGGGAGTTGAGGCAATGCTGGCCAGTCGTGATGTGGAGGGATTGAAGGATAAGCGCAACTAGGACGGACAA
Adamts2	ENSMUST00000040523	CGCGGTGGTGGTACGACATGATGTGGAGGGATTGAAGGATAAGGGAGACCACTTCTTCAGGGCCCACTCGTAAGGAGGAGGGTAATGATAGAAGCGCAACTAGGACGGACAA
Adamts2	ENSMUST00000040523	CGCGGTGGTGGTACGACATGATGTGGAGGGATTGAAGGATAGCCTCTGAGGAACACCCCAGAAATAAGAGCAGAGATTAGAGATGAGTTGGAAGCGCAACTAGGACGGACAA
Adamts2	ENSMUST00000040523	CGCGGTGGTGGTACGACATGAAGGAGGAGGGTAATGATAGATTGCAGAGCTGGAAGTCATAGGCCAGGCCCAGGAGTAGTTGGTTGTTAGGAAGCGCAACTAGGACGGACAA
Adamts2	ENSMUST00000040523	CGCGGTGGTGGTACGACATGAGGAGTAGTTGGTTGTTAGGACAAGTCTCAGCACCCTAAATTCTGCGAAGGAGAGATTAGAGATGAGTTGGAAGCGCAACTAGGACGGACAA
Adamts2	ENSMUST00000040523	CGCGGTGGTGGTACGACATGAGAGATTAGAGATGAGTTGGACGATGGCTGTTGTCAGATAAAATTCTGTGAAAGGAGGAGGGTAATGATAGAAGCGCAACTAGGACGGACAA
Adamts2	ENSMUST00000040523	CGCGGTGGTGGTACGACATGAGGAGTAGTTGGTTGTTAGGAAGTCATCCCAACTAGTACTAGTCCAGAACAATGTGGAGGGATTGAAGGATAAGCGCAACTAGGACGGACAA
Adamts2	ENSMUST00000040523	CGCGGTGGTGGTACGACATGATGTGGAGGGATTGAAGGATATTGGAGCCAGGTGGAGCTAGACCTGAAATTAAGGAGGAGGGTAATGATAGAAGCGCAACTAGGACGGACAA
Adamts2	ENSMUST00000040523	CGCGGTGGTGGTACGACATGATGTGGAGGGATTGAAGGATAGACTTGCAGCAAAGCTTGTTGTAGCTGGGGAGAGATTAGAGATGAGTTGGAAGCGCAACTAGGACGGACAA
Adamts2	ENSMUST00000040523	CGCGGTGGTGGTACGACATGAAGGAGGAGGGTAATGATAGAAAGTAGGGGTTGTCTGGGTGGCTGCACCAGAGGAGTAGTTGGTTGTTAGGAAGCGCAACTAGGACGGACAA
Adamts2	ENSMUST00000040523	CGCGGTGGTGGTACGACATGAGGAGTAGTTGGTTGTTAGGATAGGAATGCAGGTAGCGGCTGAGCTCCTGCAGAGATTAGAGATGAGTTGGAAGCGCAACTAGGACGGACAA
Adamts2	ENSMUST00000040523	CGCGGTGGTGGTACGACATGAAGGAGGAGGGTAATGATAGAGCTGGGGAATGTCAATAAGGAAGATGAATCAGAGATTAGAGATGAGTTGGAAGCGCAACTAGGACGGACAA
Adamts2	ENSMUST00000040523	CGCGGTGGTGGTACGACATGAGGAGTAGTTGGTTGTTAGGAAGGGAGTCCTCGTGAATCATGTATTTGTATATGTGGAGGGATTGAAGGATAAGCGCAACTAGGACGGACAA
Adamts2	ENSMUST00000040523	CGCGGTGGTGGTACGACATGATGTGGAGGGATTGAAGGATAAAAATTTTTCTCTCTGGGAGTCATCCCCCTAAGGAGGAGGGTAATGATAGAAGCGCAACTAGGACGGACAA
Adamts2	ENSMUST00000040523	CGCGGTGGTGGTACGACATGATGTGGAGGGATTGAAGGATATCAGACCAACATTGGTACTAAGCACCATTTAGAGATTAGAGATGAGTTGGAAGCGCAACTAGGACGGACAA
Adamts2	ENSMUST00000040523	CGCGGTGGTGGTACGACATGAAGGAGGAGGGTAATGATAGATTACGGGACCCGATCACCCCATCACATCCCAGGAGTAGTTGGTTGTTAGGAAGCGCAACTAGGACGGACAA
Adamts2	ENSMUST00000040523	CGCGGTGGTGGTACGACATGAGGAGTAGTTGGTTGTTAGGAGAGTCATCCACACCCAGCAGGACCTCAATGAGAGATTAGAGATGAGTTGGAAGCGCAACTAGGACGGACAA
Adamts2	ENSMUST00000040523	CGCGGTGGTGGTACGACATGAAGGAGGAGGGTAATGATAGAGGTGTCTATGCTCTGACTTCTTTCCATAGAAGAGATTAGAGATGAGTTGGAAGCGCAACTAGGACGGACAA
Adamts2	ENSMUST00000040523	CGCGGTGGTGGTACGACATGAGGAGTAGTTGGTTGTTAGGAGCCCAACGCACCAAGGATGTTGTCTCCCTCATGTGGAGGGATTGAAGGATAAGCGCAACTAGGACGGACAA
Adamts2	ENSMUST00000040523	CGCGGTGGTGGTACGACATGATGTGGAGGGATTGAAGGATAATACGCCTTTGCCCACCACCCTCCTGTCACAAGGAGGAGGGTAATGATAGAAGCGCAACTAGGACGGACAA
Adamts2	ENSMUST00000040523	CGCGGTGGTGGTACGACATGAGAGATTAGAGATGAGTTGGACAGTGCTTGCCAGGCGCACACATAGTACCAATGTGGAGGGATTGAAGGATAAGCGCAACTAGGACGGACAA
Adamts2	ENSMUST00000040523	CGCGGTGGTGGTACGACATGAGGAGTAGTTGGTTGTTAGGACATCGTGGTCTGTGTCCGGCTTCTGCTGGAAAGGAGGAGGGTAATGATAGAAGCGCAACTAGGACGGACAA
Adamts2	ENSMUST00000040523	CGCGGTGGTGGTACGACATGAGGAGTAGTTGGTTGTTAGGAAATGCCGAGGAGAAGCCATCTTCATGGTTCAGAGATTAGAGATGAGTTGGAAGCGCAACTAGGACGGACAA
Adamts2	ENSMUST00000040523	CGCGGTGGTGGTACGACATGAGAGATTAGAGATGAGTTGGACCCCAGTTGCCGTCTCGTTTGAGGATATCGAAGGAGGAGGGTAATGATAGAAGCGCAACTAGGACGGACAA
Adamts2	ENSMUST00000040523	CGCGGTGGTGGTACGACATGAGGAGTAGTTGGTTGTTAGGACCCACTCCACACCCATGGCAATGAAGGATCATGTGGAGGGATTGAAGGATAAGCGCAACTAGGACGGACAA
Adamts2	ENSMUST00000040523	CGCGGTGGTGGTACGACATGATGTGGAGGGATTGAAGGATATCCTGGATTCTTTGGTTCCTTGTCTTTACAAAGGAGGAGGGTAATGATAGAAGCGCAACTAGGACGGACAA
Adamts2	ENSMUST00000040523	CGCGGTGGTGGTACGACATGAGAGATTAGAGATGAGTTGGAAACGACTCATCATGGTAGATTTCGTTGACAATGTGGAGGGATTGAAGGATAAGCGCAACTAGGACGGACAA
Adamts2	ENSMUST00000040523	CGCGGTGGTGGTACGACATGAGGAGTAGTTGGTTGTTAGGATGTCTCCTTGGACTCACAGTAGAGGTGGCAAAGGAGGAGGGTAATGATAGAAGCGCAACTAGGACGGACAA
Adamts2	ENSMUST00000040523	CGCGGTGGTGGTACGACATGAGGAGTAGTTGGTTGTTAGGAATGTCATTGTGCTTCCCGGGAGGAGGCTCCAGAGATTAGAGATGAGTTGGAAGCGCAACTAGGACGGACAA
Adamts2	ENSMUST00000040523	CGCGGTGGTGGTACGACATGAGAGATTAGAGATGAGTTGGAGTTCTCAACCATTGCTTAGTAAGTTGGAGCAAGGAGGAGGGTAATGATAGAAGCGCAACTAGGACGGACAA
Adamts2	ENSMUST00000040523	CGCGGTGGTGGTACGACATGAGGAGTAGTTGGTTGTTAGGATGCCATGTGGAACTGAGCAACTGCTAGATCATGTGGAGGGATTGAAGGATAAGCGCAACTAGGACGGACAA
Adamts2	ENSMUST00000040523	CGCGGTGGTGGTACGACATGATGTGGAGGGATTGAAGGATATGGAGTAGCATGCTCACAAAATGCCAGCAAAAGGAGGAGGGTAATGATAGAAGCGCAACTAGGACGGACAA
Adamts2	ENSMUST00000040523	CGCGGTGGTGGTACGACATGATGTGGAGGGATTGAAGGATAACTCTTCTACCACAGCCATGGGTAGGGGCAAGAGATTAGAGATGAGTTGGAAGCGCAACTAGGACGGACAA
Adamts2	ENSMUST00000040523	CGCGGTGGTGGTACGACATGAGGAGTAGTTGGTTGTTAGGACCATCACAGTTACTGAGCGCCACCGAGGAGAAGGAGGAGGGTAATGATAGAAGCGCAACTAGGACGGACAA
Adamts2	ENSMUST00000040523	CGCGGTGGTGGTACGACATGAGAGATTAGAGATGAGTTGGAATAGCCTTGCATGCCCGAGGGCCCAAAATCAGGAGTAGTTGGTTGTTAGGAAGCGCAACTAGGACGGACAA
Adamts2	ENSMUST00000040523	CGCGGTGGTGGTACGACATGAGAGATTAGAGATGAGTTGGATCCACGGGGTTTCCGAAAGGGCCTCTTTAAAAGGAGGAGGGTAATGATAGAAGCGCAACTAGGACGGACAA
Adamts2	ENSMUST00000040523	CGCGGTGGTGGTACGACATGATGTGGAGGGATTGAAGGATATCTGCCCCTTCTCCAGAGGTTCGATAAAGAAGGAGTAGTTGGTTGTTAGGAAGCGCAACTAGGACGGACAA
Adamts2	ENSMUST00000040523	CGCGGTGGTGGTACGACATGAAGGAGGAGGGTAATGATAGATGGCTAAAGCCCACCAACAGCTCTAGGTGGATGTGGAGGGATTGAAGGATAAGCGCAACTAGGACGGACAA
Adamts2	ENSMUST00000040523	CGCGGTGGTGGTACGACATGATGTGGAGGGATTGAAGGATATCCAGTGGAGGACCCTTCTTTGTCTTGCAAAGAGATTAGAGATGAGTTGGAAGCGCAACTAGGACGGACAA
Adamts2	ENSMUST00000040523	CGCGGTGGTGGTACGACATGAGGAGTAGTTGGTTGTTAGGAGCAAGTAAGGCCATGGTGAAGTGGAGAAGAAAGGAGGAGGGTAATGATAGAAGCGCAACTAGGACGGACAA
Adamts2	ENSMUST00000040523	CGCGGTGGTGGTACGACATGAGGAGTAGTTGGTTGTTAGGACAGTGGTGCTGGACATCACCGTGCTCAAAGAGAGATTAGAGATGAGTTGGAAGCGCAACTAGGACGGACAA
Adamts2	ENSMUST00000040523	CGCGGTGGTGGTACGACATGAGAGATTAGAGATGAGTTGGATCCTGAACTTCACGCCTGTGCCACAGGTGCAAGGAGGAGGGTAATGATAGAAGCGCAACTAGGACGGACAA
Adamts2	ENSMUST00000040523	CGCGGTGGTGGTACGACATGAGGAGTAGTTGGTTGTTAGGAGGACACAGAGGAGAAGCCTTAGAATTCTGGATGTGGAGGGATTGAAGGATAAGCGCAACTAGGACGGACAA
Adamts2	ENSMUST00000040523	CGCGGTGGTGGTACGACATGATGTGGAGGGATTGAAGGATAGGGGTAGTAAAGGGACATTTCCCAGTTTGGAAGGAGGAGGGTAATGATAGAAGCGCAACTAGGACGGACAA
Adamts2	ENSMUST00000040523	CGCGGTGGTGGTACGACATGAGAGATTAGAGATGAGTTGGATCTTTAGCCCAGGAGTAAACCCTGCTGACCATGTGGAGGGATTGAAGGATAAGCGCAACTAGGACGGACAA
Adamts2	ENSMUST00000040523	CGCGGTGGTGGTACGACATGAAGGAGGAGGGTAATGATAGAGCTCCCACCTCCCACCCTGTACGTCAGATTAGGAGTAGTTGGTTGTTAGGAAGCGCAACTAGGACGGACAA
Adamts2	ENSMUST00000040523	CGCGGTGGTGGTACGACATGAGAGATTAGAGATGAGTTGGAATTCTCCAAACCATCCTCCCATGCTCGGGCAGGAGTAGTTGGTTGTTAGGAAGCGCAACTAGGACGGACAA
Adamts2	ENSMUST00000040523	CGCGGTGGTGGTACGACATGAAGGAGGAGGGTAATGATAGAGCAGGTCTCGGCCGAATACTGTGAGGTTGTAGAGATTAGAGATGAGTTGGAAGCGCAACTAGGACGGACAA
Adamts2	ENSMUST00000040523	CGCGGTGGTGGTACGACATGAGGAGTAGTTGGTTGTTAGGATGTCCAGAGCCTGTGGTTCGCTCACAGGAGATGTGGAGGGATTGAAGGATAAGCGCAACTAGGACGGACAA
Adamts2	ENSMUST00000040523	CGCGGTGGTGGTACGACATGATGTGGAGGGATTGAAGGATATCTCTCCTTGGCATCCCGGTGCTCATGAGGAAGGAGGAGGGTAATGATAGAAGCGCAACTAGGACGGACAA
Adamts2	ENSMUST00000040523	CGCGGTGGTGGTACGACATGATGTGGAGGGATTGAAGGATATCGCTCCTCCCGGCAGACACCAAAATTATCAGAGATTAGAGATGAGTTGGAAGCGCAACTAGGACGGACAA
Adamts2	ENSMUST00000040523	CGCGGTGGTGGTACGACATGAGGAGTAGTTGGTTGTTAGGATAAAGGTTGGAGGTGGGCAGGGGCAAGGTCAAGGAGGAGGGTAATGATAGAAGCGCAACTAGGACGGACAA
Adamts2	ENSMUST00000040523	CGCGGTGGTGGTACGACATGAGGAGTAGTTGGTTGTTAGGAGTACCATTTTCCATGCATTCCAAACCTTCTAGAGATTAGAGATGAGTTGGAAGCGCAACTAGGACGGACAA
Adamts2	ENSMUST00000040523	CGCGGTGGTGGTACGACATGAGAGATTAGAGATGAGTTGGAGAGACGGGACCTCTTCATCCACACCATGGAAAGGAGGAGGGTAATGATAGAAGCGCAACTAGGACGGACAA
Adamts2	ENSMUST00000040523	CGCGGTGGTGGTACGACATGATGTGGAGGGATTGAAGGATATACAGGTCCCACTGCTGACACTGCTCCTCCAGGAGTAGTTGGTTGTTAGGAAGCGCAACTAGGACGGACAA
Adamts2	ENSMUST00000040523	CGCGGTGGTGGTACGACATGAAGGAGGAGGGTAATGATAGAGTGTCTCCTTCAGGAATAACCAGCACGGTGATGTGGAGGGATTGAAGGATAAGCGCAACTAGGACGGACAA
Adamts2	ENSMUST00000040523	CGCGGTGGTGGTACGACATGATGTGGAGGGATTGAAGGATACTCCCATTTTCCTCCCATTCATATCTGGCTAGAGATTAGAGATGAGTTGGAAGCGCAACTAGGACGGACAA
Adamts2	ENSMUST00000040523	CGCGGTGGTGGTACGACATGAGGAGTAGTTGGTTGTTAGGACCTCCACACACGCCACACTTGTCTTCCTGCAAGGAGGAGGGTAATGATAGAAGCGCAACTAGGACGGACAA
Adamts2	ENSMUST00000040523	CGCGGTGGTGGTACGACATGAGGAGTAGTTGGTTGTTAGGATCATGGACTTTGCGTGGCTCAGCAGGATAAAGAGATTAGAGATGAGTTGGAAGCGCAACTAGGACGGACAA
Adamts2	ENSMUST00000040523	CGCGGTGGTGGTACGACATGAGAGATTAGAGATGAGTTGGATTGGCTGGATGTGGGTTGTCACACTGGCGGAAGGAGGAGGGTAATGATAGAAGCGCAACTAGGACGGACAA
Adamts2	ENSMUST00000040523	CGCGGTGGTGGTACGACATGATGTGGAGGGATTGAAGGATAAGTCAGCCAGGGAATTGGGACAGTCCTGGGAGGAGTAGTTGGTTGTTAGGAAGCGCAACTAGGACGGACAA
Adamts2	ENSMUST00000040523	CGCGGTGGTGGTACGACATGAAGGAGGAGGGTAATGATAGAACTCCTCCTCCTCCATCCGGATCAGACCAGATGTGGAGGGATTGAAGGATAAGCGCAACTAGGACGGACAA
Adamts2	ENSMUST00000040523	CGCGGTGGTGGTACGACATGATGTGGAGGGATTGAAGGATAACTTAGTGAACTGGGACCCTCCACCGCAGGAGAGATTAGAGATGAGTTGGAAGCGCAACTAGGACGGACAA
Adamts2	ENSMUST00000040523	CGCGGTGGTGGTACGACATGAGGAGTAGTTGGTTGTTAGGAATGGAGCAGTAGCGAGACAAGACTTCCATCAAGGAGGAGGGTAATGATAGAAGCGCAACTAGGACGGACAA
Adamts2	ENSMUST00000040523	CGCGGTGGTGGTACGACATGAGGAGTAGTTGGTTGTTAGGATGTACCATCTTGCTGTCCAACCTCCGGCGGAGAGATTAGAGATGAGTTGGAAGCGCAACTAGGACGGACAA
Adamts2	ENSMUST00000040523	CGCGGTGGTGGTACGACATGAAGGAGGAGGGTAATGATAGATCTTGTTTCCTCGGTGACCTCGTGAATGTGAGAGATTAGAGATGAGTTGGAAGCGCAACTAGGACGGACAA
Adamts2	ENSMUST00000040523	CGCGGTGGTGGTACGACATGAGGAGTAGTTGGTTGTTAGGATATCCCACAGCCCTTAGAATGGGTAAACTCATGTGGAGGGATTGAAGGATAAGCGCAACTAGGACGGACAA
Adamts2	ENSMUST00000040523	CGCGGTGGTGGTACGACATGAAGGAGGAGGGTAATGATAGACCAGGCTGGGCCCAGCTAGAGCACTAACATATGTGGAGGGATTGAAGGATAAGCGCAACTAGGACGGACAA
Adamts2	ENSMUST00000040523	CGCGGTGGTGGTACGACATGAGAGATTAGAGATGAGTTGGACCTGCGGGGATCTCAAACATCTTGATGTAAATGTGGAGGGATTGAAGGATAAGCGCAACTAGGACGGACAA
Adamts2	ENSMUST00000040523	CGCGGTGGTGGTACGACATGAAGGAGGAGGGTAATGATAGAAGCTGTTTGCAGGGGTCGAAGGTCCGGAACAGGAGTAGTTGGTTGTTAGGAAGCGCAACTAGGACGGACAA
Adamts2	ENSMUST00000040523	CGCGGTGGTGGTACGACATGAGAGATTAGAGATGAGTTGGATGCCGGAAACCTTCAGAGGACACCTACCTGAGGAGTAGTTGGTTGTTAGGAAGCGCAACTAGGACGGACAA
Adamts2	ENSMUST00000040523	CGCGGTGGTGGTACGACATGAAGGAGGAGGGTAATGATAGAAAGGCTGTCTTGCTGGGGCTGTCCCATGTGAGAGATTAGAGATGAGTTGGAAGCGCAACTAGGACGGACAA
Adamts2	ENSMUST00000040523	CGCGGTGGTGGTACGACATGATGTGGAGGGATTGAAGGATAATGCCCCCACCCACCCCAATATATTCTTTTAGGAGTAGTTGGTTGTTAGGAAGCGCAACTAGGACGGACAA
Adamts2	ENSMUST00000040523	CGCGGTGGTGGTACGACATGATGTGGAGGGATTGAAGGATAAACAGAATTGCTCTCAACCACATACCAGGAAAGGAGGAGGGTAATGATAGAAGCGCAACTAGGACGGACAA
Adamts2	ENSMUST00000040523	CGCGGTGGTGGTACGACATGATGTGGAGGGATTGAAGGATAATTCACTCCCAGCTTACAAGGGGGAAGGAGAGAGATTAGAGATGAGTTGGAAGCGCAACTAGGACGGACAA
Adamts2	ENSMUST00000040523	CGCGGTGGTGGTACGACATGAAGGAGGAGGGTAATGATAGAACAGGCTTGGCCGTCGAGGGATCAGGTTAGAGGAGTAGTTGGTTGTTAGGAAGCGCAACTAGGACGGACAA
Adamts2	ENSMUST00000040523	CGCGGTGGTGGTACGACATGAGGAGTAGTTGGTTGTTAGGATTCTTTGGGAGCTGGAGCAGTGCAGGGTCGAGAGATTAGAGATGAGTTGGAAGCGCAACTAGGACGGACAA
Adamts2	ENSMUST00000040523	CGCGGTGGTGGTACGACATGAGAGATTAGAGATGAGTTGGATGACCTCCCATCATTGATAAGAAACTAGGGAAGGAGGAGGGTAATGATAGAAGCGCAACTAGGACGGACAA
Adamts2	ENSMUST00000040523	CGCGGTGGTGGTACGACATGAGGAGTAGTTGGTTGTTAGGAGGTTACCACACTTATCCTATCCTCTGCCTGATGTGGAGGGATTGAAGGATAAGCGCAACTAGGACGGACAA
Adamts2	ENSMUST00000040523	CGCGGTGGTGGTACGACATGATGTGGAGGGATTGAAGGATACTGGGTGATCTTCAGTGGCATTGGTGCTAGAAGGAGGAGGGTAATGATAGAAGCGCAACTAGGACGGACAA
Adamts2	ENSMUST00000040523	CGCGGTGGTGGTACGACATGATGTGGAGGGATTGAAGGATAGCCCTTAGGTCTTACTAAGGTGTGGGGCACAGAGATTAGAGATGAGTTGGAAGCGCAACTAGGACGGACAA
Adamts2	ENSMUST00000040523	CGCGGTGGTGGTACGACATGAAGGAGGAGGGTAATGATAGAATCGTTGCAGTGTTTGGTGTGCACGGAGCGAGGAGTAGTTGGTTGTTAGGAAGCGCAACTAGGACGGACAA
Adamts2	ENSMUST00000040523	CGCGGTGGTGGTACGACATGAGAGATTAGAGATGAGTTGGAATCTGCAGTGCGACAGAGCACTGGCCGTTCAGGAGTAGTTGGTTGTTAGGAAGCGCAACTAGGACGGACAA
Adamts2	ENSMUST00000040523	CGCGGTGGTGGTACGACATGAGAGATTAGAGATGAGTTGGAGACTCCATCATTCTTCCTCACTGGGTCTTTAAGGAGGAGGGTAATGATAGAAGCGCAACTAGGACGGACAA
Adamts2	ENSMUST00000040523	CGCGGTGGTGGTACGACATGATGTGGAGGGATTGAAGGATAGAGAAGTGGTCCTTGCCGCCTTTGACCCAAAGGAGTAGTTGGTTGTTAGGAAGCGCAACTAGGACGGACAA
Adamts2	ENSMUST00000040523	CGCGGTGGTGGTACGACATGATGTGGAGGGATTGAAGGATACTACAGAACATTGACTTGTCGCCTTGGCACAAGGAGGAGGGTAATGATAGAAGCGCAACTAGGACGGACAA
Adamts4	ENSMUST00000111314	CGCGGTGGTGGTACGACATGAGGGTTGATTAGTGGTAGAAAGGGACTAAAGATAGGCACAAGTGACATGAAAGGGATGTATTGAAGGAGGATAGCGCAACTAGGACGGACAA
Adamts4	ENSMUST00000111314	CGCGGTGGTGGTACGACATGAGAGGGTTTGTAAGGTGAATACACAATCATCCCTTACTCCCTGAAGGCAGTAGGGATGTATTGAAGGAGGATAGCGCAACTAGGACGGACAA
Adamts4	ENSMUST00000111314	CGCGGTGGTGGTACGACATGAGGGTGGTTTAGTGTGTGTTTGCCCTCACGTGTGCCTCAGGATTCCTGAAGAGGGATGTATTGAAGGAGGATAGCGCAACTAGGACGGACAA
Adamts4	ENSMUST00000111314	CGCGGTGGTGGTACGACATGAGAGGGTTTGTAAGGTGAATATAAAGGCTTTAGCGGCAGCTGCCATAACCGAGGGTTGATTAGTGGTAGAAAAGCGCAACTAGGACGGACAA
Adamts4	ENSMUST00000111314	CGCGGTGGTGGTACGACATGAGGGTGGTTTAGTGTGTGTTTGTGTTTTAGCAGGAGGCAGTTGCAGAAGCCAGGGTTGATTAGTGGTAGAAAAGCGCAACTAGGACGGACAA
Adamts4	ENSMUST00000111314	CGCGGTGGTGGTACGACATGAGAGGGTTTGTAAGGTGAATATCAGCAGGTAGCGCTTTAACCCTGTACCATAGGGTGGTTTAGTGTGTGTTTAGCGCAACTAGGACGGACAA
Adamts4	ENSMUST00000111314	CGCGGTGGTGGTACGACATGAGGGTTGATTAGTGGTAGAAACCTTCATGTTCTTGTTGACTATCTTTGCCAAGGGATGTATTGAAGGAGGATAGCGCAACTAGGACGGACAA
Adamts4	ENSMUST00000111314	CGCGGTGGTGGTACGACATGAGGGATGTATTGAAGGAGGATGCCATTCTTACAACTAAGCTCCTGTTTGTGAGAGGGTTTGTAAGGTGAATAAGCGCAACTAGGACGGACAA
Adamts4	ENSMUST00000111314	CGCGGTGGTGGTACGACATGAGGGATGTATTGAAGGAGGATTTCCATTCCTAGATGTTGGTTGGGCTTACTAGGGTGGTTTAGTGTGTGTTTAGCGCAACTAGGACGGACAA
Adamts4	ENSMUST00000111314	CGCGGTGGTGGTACGACATGAGGGTTGATTAGTGGTAGAAATGTCTCTGAGGCTGCTGTGGCTCCGCTGTAAGAGGGTTTGTAAGGTGAATAAGCGCAACTAGGACGGACAA
Adamts4	ENSMUST00000111314	CGCGGTGGTGGTACGACATGAGGGTGGTTTAGTGTGTGTTTTCACAAGTGGAGACCCCACACAGGTCCTGCAGGGTTGATTAGTGGTAGAAAAGCGCAACTAGGACGGACAA
Adamts4	ENSMUST00000111314	CGCGGTGGTGGTACGACATGAGGGTGGTTTAGTGTGTGTTTTTTTGAAGGAGCCCGACTGCTTGCTGCAGCAGAGGGTTTGTAAGGTGAATAAGCGCAACTAGGACGGACAA
Adamts4	ENSMUST00000111314	CGCGGTGGTGGTACGACATGAGGGTTGATTAGTGGTAGAAAATTCTGTGGGTTGCCAGCCACCAGGACTTGAGGGATGTATTGAAGGAGGATAGCGCAACTAGGACGGACAA
Adamts4	ENSMUST00000111314	CGCGGTGGTGGTACGACATGAGGGATGTATTGAAGGAGGATTGCCTACAGAAGTAATAGACAAGATGGCCAAGAGGGTTTGTAAGGTGAATAAGCGCAACTAGGACGGACAA
Adamts4	ENSMUST00000111314	CGCGGTGGTGGTACGACATGAGGGATGTATTGAAGGAGGATAGATGCTCTTGAGACCAGACCCCCCCTGCTAGGGTGGTTTAGTGTGTGTTTAGCGCAACTAGGACGGACAA
Adamts4	ENSMUST00000111314	CGCGGTGGTGGTACGACATGAGAGGGTTTGTAAGGTGAATAGGAGCAGCAGCTGCCATTCCTTGAGCACCTAGGGTTGATTAGTGGTAGAAAAGCGCAACTAGGACGGACAA
Adamts4	ENSMUST00000111314	CGCGGTGGTGGTACGACATGAGGGTTGATTAGTGGTAGAAACGAGAGGAACCCCCCTGCCCATTCAAGTTAAGGGTGGTTTAGTGTGTGTTTAGCGCAACTAGGACGGACAA
Adamts4	ENSMUST00000111314	CGCGGTGGTGGTACGACATGAGAGGGTTTGTAAGGTGAATAGCTGTCGTTCTGGAAGAAGAGGAGGCTTGCAGGGTGGTTTAGTGTGTGTTTAGCGCAACTAGGACGGACAA
Adamts4	ENSMUST00000111314	CGCGGTGGTGGTACGACATGAGGGATGTATTGAAGGAGGATAATAAATACAACTAGGGCCCAGGACCCACCAGGGTTGATTAGTGGTAGAAAAGCGCAACTAGGACGGACAA
Adamts4	ENSMUST00000111314	CGCGGTGGTGGTACGACATGAGAGGGTTTGTAAGGTGAATAATTGGTCTCGAGGGGCCACACCTGTGTAGCAGGGATGTATTGAAGGAGGATAGCGCAACTAGGACGGACAA
Adamts4	ENSMUST00000111314	CGCGGTGGTGGTACGACATGAGGGTGGTTTAGTGTGTGTTTGTGCATGGCTTGGAGTTATCATGGAGCATGAGGGATGTATTGAAGGAGGATAGCGCAACTAGGACGGACAA
Adamts4	ENSMUST00000111314	CGCGGTGGTGGTACGACATGAGAGGGTTTGTAAGGTGAATATGTCACCACAAAGGTCACCTCTCCTGTTACAGGGTTGATTAGTGGTAGAAAAGCGCAACTAGGACGGACAA
Adamts4	ENSMUST00000111314	CGCGGTGGTGGTACGACATGAGGGTTGATTAGTGGTAGAAACCAGTGTCTCCACGAATCTACTCAGAGAAGAGGGTGGTTTAGTGTGTGTTTAGCGCAACTAGGACGGACAA
Adamts4	ENSMUST00000111314	CGCGGTGGTGGTACGACATGAGAGGGTTTGTAAGGTGAATAAGTCCTTGAGCTGGTCCACGTGCAGACAGCAGGGTGGTTTAGTGTGTGTTTAGCGCAACTAGGACGGACAA
Adamts4	ENSMUST00000111314	CGCGGTGGTGGTACGACATGAGGGATGTATTGAAGGAGGATATCTGAGTCGTTAGGGGTGTTGAGGCCCCGAGGGTTGATTAGTGGTAGAAAAGCGCAACTAGGACGGACAA
Adamts4	ENSMUST00000111314	CGCGGTGGTGGTACGACATGAGAGGGTTTGTAAGGTGAATACCAAATCCCAGTGTTTTTGTGGTAATGTTGAGGGATGTATTGAAGGAGGATAGCGCAACTAGGACGGACAA
Adamts4	ENSMUST00000111314	CGCGGTGGTGGTACGACATGAGGGTGGTTTAGTGTGTGTTTCCTACCTTTGACTTTCCTTTTCCCAGAAAAAGGGATGTATTGAAGGAGGATAGCGCAACTAGGACGGACAA
Adamts4	ENSMUST00000111314	CGCGGTGGTGGTACGACATGAGAGGGTTTGTAAGGTGAATATTGATTGATTCTGGAGTCACTGTCCCAGTCAGGGTTGATTAGTGGTAGAAAAGCGCAACTAGGACGGACAA
Adamts4	ENSMUST00000111314	CGCGGTGGTGGTACGACATGAGGGTGGTTTAGTGTGTGTTTGCATCAGCGTGTATTCACCATTGAGGGCGTAGGGTTGATTAGTGGTAGAAAAGCGCAACTAGGACGGACAA
Adamts4	ENSMUST00000111314	CGCGGTGGTGGTACGACATGAGGGTGGTTTAGTGTGTGTTTTGTGGGAGTAGGACTAGAGGCTGAGCTGCGAGAGGGTTTGTAAGGTGAATAAGCGCAACTAGGACGGACAA
Adamts4	ENSMUST00000111314	CGCGGTGGTGGTACGACATGAGGGATGTATTGAAGGAGGATCACACACACACACCACTCATATTTGTCACCAGGGTTGATTAGTGGTAGAAAAGCGCAACTAGGACGGACAA
Adamts4	ENSMUST00000111314	CGCGGTGGTGGTACGACATGAGGGATGTATTGAAGGAGGATCTGTCTTCCCCCCATTCCTCCTGTGACCTGAGAGGGTTTGTAAGGTGAATAAGCGCAACTAGGACGGACAA
Adamts4	ENSMUST00000111314	CGCGGTGGTGGTACGACATGAGGGATGTATTGAAGGAGGATCCAGGTAATAAGATGCTGAACCCTAACTCAAGGGTGGTTTAGTGTGTGTTTAGCGCAACTAGGACGGACAA
Adamts4	ENSMUST00000111314	CGCGGTGGTGGTACGACATGAGGGTTGATTAGTGGTAGAAACGGGACAAAGAAACTGTACCGCAGACGTGCAGAGGGTTTGTAAGGTGAATAAGCGCAACTAGGACGGACAA
Adamts4	ENSMUST00000111314	CGCGGTGGTGGTACGACATGAGGGTGGTTTAGTGTGTGTTTTCAGTGATGAATCGGGCACTGCAGGGCGACAGGGTTGATTAGTGGTAGAAAAGCGCAACTAGGACGGACAA
Adamts4	ENSMUST00000111314	CGCGGTGGTGGTACGACATGAGAGGGTTTGTAAGGTGAATAATACGTAGTAGTAGCCCAGTGCCCGGGCCTAGGGTGGTTTAGTGTGTGTTTAGCGCAACTAGGACGGACAA
Adamts4	ENSMUST00000111314	CGCGGTGGTGGTACGACATGAGGGTTGATTAGTGGTAGAAAAGTTGACAGGGTTTCGGATGCTTGGGTGTTAGGGATGTATTGAAGGAGGATAGCGCAACTAGGACGGACAA
Adamts4	ENSMUST00000111314	CGCGGTGGTGGTACGACATGAGAGGGTTTGTAAGGTGAATAAAAGCAGCTGGGACTGACTCAGGGAGGAGGAGGGATGTATTGAAGGAGGATAGCGCAACTAGGACGGACAA
Adamts4	ENSMUST00000111314	CGCGGTGGTGGTACGACATGAGGGTGGTTTAGTGTGTGTTTACATGGGCCATGACAGGAGCCATGACATGGAGGGATGTATTGAAGGAGGATAGCGCAACTAGGACGGACAA
Adamts4	ENSMUST00000111314	CGCGGTGGTGGTACGACATGAGAGGGTTTGTAAGGTGAATATCACAATACTTGCCACCGTTCCGGGGGACGAGGGTTGATTAGTGGTAGAAAAGCGCAACTAGGACGGACAA
Adamts4	ENSMUST00000111314	CGCGGTGGTGGTACGACATGAGGGTTGATTAGTGGTAGAAATGCAATCCCGGGAGGAGAACTGGACACCACAGGGTGGTTTAGTGTGTGTTTAGCGCAACTAGGACGGACAA
Adamts4	ENSMUST00000111314	CGCGGTGGTGGTACGACATGAGGGTGGTTTAGTGTGTGTTTAGGCAGTGCCCATAACCATTGTCCAGGAAGAGAGGGTTTGTAAGGTGAATAAGCGCAACTAGGACGGACAA
Adamts4	ENSMUST00000111314	CGCGGTGGTGGTACGACATGAGGGTTGATTAGTGGTAGAAACCGGGGTCTAGAATTCAGCCGAGTTAGCTGAGGGATGTATTGAAGGAGGATAGCGCAACTAGGACGGACAA
Adamts4	ENSMUST00000111314	CGCGGTGGTGGTACGACATGAGGGATGTATTGAAGGAGGATGCAGGTTGTACCTCATACATAAACACACACAGAGGGTTTGTAAGGTGAATAAGCGCAACTAGGACGGACAA
Adamts4	ENSMUST00000111314	CGCGGTGGTGGTACGACATGAGGGATGTATTGAAGGAGGATAACAGGGTCCTGCCAACCGAAGGTCCTGAGAGGGTGGTTTAGTGTGTGTTTAGCGCAACTAGGACGGACAA
Adamts4	ENSMUST00000111314	CGCGGTGGTGGTACGACATGAGAGGGTTTGTAAGGTGAATAGACCGAAGGTCAGTTGGCATTGGCGGTCAGAGGGTTGATTAGTGGTAGAAAAGCGCAACTAGGACGGACAA
Adamts4	ENSMUST00000111314	CGCGGTGGTGGTACGACATGAGGGTTGATTAGTGGTAGAAAAAGACATCACTGCCTCCCAGGGCAGGAAGCAGGGTGGTTTAGTGTGTGTTTAGCGCAACTAGGACGGACAA
Adamts4	ENSMUST00000111314	CGCGGTGGTGGTACGACATGAGAGGGTTTGTAAGGTGAATACTGCACTGTGTGGTTGGAGGAACAATTCAGAGGGTGGTTTAGTGTGTGTTTAGCGCAACTAGGACGGACAA
Adamts4	ENSMUST00000111314	CGCGGTGGTGGTACGACATGAGGGATGTATTGAAGGAGGATGTACTGTCACCTAGCCCCTTTCCATTCACCAGGGTTGATTAGTGGTAGAAAAGCGCAACTAGGACGGACAA
Adamts4	ENSMUST00000111314	CGCGGTGGTGGTACGACATGAGAGGGTTTGTAAGGTGAATATGCTCATTCTCCCAGATGAGTCCGAGGCCCAGGGATGTATTGAAGGAGGATAGCGCAACTAGGACGGACAA
Adamts4	ENSMUST00000111314	CGCGGTGGTGGTACGACATGAGGGTGGTTTAGTGTGTGTTTCTATAATGGGTGAGTTTCCCCAAGACCCTAAGGGATGTATTGAAGGAGGATAGCGCAACTAGGACGGACAA
Adamts4	ENSMUST00000111314	CGCGGTGGTGGTACGACATGAGAGGGTTTGTAAGGTGAATATCTGAGAGTCTGAACTCTCTCCAAATCCTAAGGGTTGATTAGTGGTAGAAAAGCGCAACTAGGACGGACAA
Adamts4	ENSMUST00000111314	CGCGGTGGTGGTACGACATGAGGGTTGATTAGTGGTAGAAATCATAGTCCTTGCCAGGAAAAGTCGCTGGTAGGGTGGTTTAGTGTGTGTTTAGCGCAACTAGGACGGACAA
Adamts4	ENSMUST00000111314	CGCGGTGGTGGTACGACATGAGGGTGGTTTAGTGTGTGTTTATGGGCCCTGGAAAGCTCTTGAAGAGGTCGAGAGGGTTTGTAAGGTGAATAAGCGCAACTAGGACGGACAA
Adamts4	ENSMUST00000111314	CGCGGTGGTGGTACGACATGAGGGATGTATTGAAGGAGGATCCCCAGGAAGAACCACATCTGTTGGGGAGGAGGGTTGATTAGTGGTAGAAAAGCGCAACTAGGACGGACAA
Adamts4	ENSMUST00000111314	CGCGGTGGTGGTACGACATGAGGGATGTATTGAAGGAGGATGGAATGCTGCCATCTTGTCATCTGCTACCAAGAGGGTTTGTAAGGTGAATAAGCGCAACTAGGACGGACAA
Adamts4	ENSMUST00000111314	CGCGGTGGTGGTACGACATGAGGGATGTATTGAAGGAGGATTCAGCAGCTAGGGCCACAGCCAGATCTCAGAGGGTGGTTTAGTGTGTGTTTAGCGCAACTAGGACGGACAA
Adamts4	ENSMUST00000111314	CGCGGTGGTGGTACGACATGAGGGTTGATTAGTGGTAGAAAGAACAGAATGGCTGTGTCAAAGTGGTCAGGAGAGGGTTTGTAAGGTGAATAAGCGCAACTAGGACGGACAA
Adamts4	ENSMUST00000111314	CGCGGTGGTGGTACGACATGAGGGTTGATTAGTGGTAGAAAAAGAACCGTCAGAAAGCTTCAGGGCCAGGTAGGGTGGTTTAGTGTGTGTTTAGCGCAACTAGGACGGACAA
Adamts4	ENSMUST00000111314	CGCGGTGGTGGTACGACATGAGAGGGTTTGTAAGGTGAATAAGATCCACCAGCTCCTGGAATGCCAGGATGAGGGTGGTTTAGTGTGTGTTTAGCGCAACTAGGACGGACAA
Adamts4	ENSMUST00000111314	CGCGGTGGTGGTACGACATGAGGGATGTATTGAAGGAGGATCAGGGTAGAGGGGGCAGTTTAGTAGATAGGAGGGTTGATTAGTGGTAGAAAAGCGCAACTAGGACGGACAA
Adamts4	ENSMUST00000111314	CGCGGTGGTGGTACGACATGAGAGGGTTTGTAAGGTGAATAACCAGACCACATCCTGTTCCTCTCATTGAAAGGGATGTATTGAAGGAGGATAGCGCAACTAGGACGGACAA
Adamts4	ENSMUST00000111314	CGCGGTGGTGGTACGACATGAGGGATGTATTGAAGGAGGATTACAAGGATATGGGTGGCCCCCGCAGGGATAGGGTGGTTTAGTGTGTGTTTAGCGCAACTAGGACGGACAA
Adamts4	ENSMUST00000111314	CGCGGTGGTGGTACGACATGAGGGTTGATTAGTGGTAGAAAAGTGAGGTTATTTCCGGCCTGCCCAGGGACAGAGGGTTTGTAAGGTGAATAAGCGCAACTAGGACGGACAA
Adamts4	ENSMUST00000111314	CGCGGTGGTGGTACGACATGAGGGTGGTTTAGTGTGTGTTTTTCTCCGTGTTGCAGGAGCGGAAGCGAGTCAGGGTTGATTAGTGGTAGAAAAGCGCAACTAGGACGGACAA
Adamts4	ENSMUST00000111314	CGCGGTGGTGGTACGACATGAGAGGGTTTGTAAGGTGAATATCCAGGGAGTTGTTGGGTTCTGTTCTTGTAAGGGTGGTTTAGTGTGTGTTTAGCGCAACTAGGACGGACAA
Adamts4	ENSMUST00000111314	CGCGGTGGTGGTACGACATGAGGGTTGATTAGTGGTAGAAAACAAGTCCTGGAGCAGTCACCCCATGGTCCAGGGATGTATTGAAGGAGGATAGCGCAACTAGGACGGACAA
Adamts4	ENSMUST00000111314	CGCGGTGGTGGTACGACATGAGGGATGTATTGAAGGAGGATACTGAGTGAGAGGCTCTATGCTAGTTCTTTAGAGGGTTTGTAAGGTGAATAAGCGCAACTAGGACGGACAA
Adamts4	ENSMUST00000111314	CGCGGTGGTGGTACGACATGAGGGATGTATTGAAGGAGGATGTTTCATGGCTAAGTGGGCCCCAGAGGTGAAGGGTGGTTTAGTGTGTGTTTAGCGCAACTAGGACGGACAA
Adamts4	ENSMUST00000111314	CGCGGTGGTGGTACGACATGAGGGTTGATTAGTGGTAGAAAAACACCCTGGATTTCATAGCTAGGTTAGGGAGAGGGTTTGTAAGGTGAATAAGCGCAACTAGGACGGACAA
Adamts4	ENSMUST00000111314	CGCGGTGGTGGTACGACATGAGGGTGGTTTAGTGTGTGTTTGGCTTTGCTTTGCTTTGTTGATTATTAGGCAGGGTTGATTAGTGGTAGAAAAGCGCAACTAGGACGGACAA
Adamts4	ENSMUST00000111314	CGCGGTGGTGGTACGACATGAGAGGGTTTGTAAGGTGAATATTGAAGACATGGCCCAGTTCATGAGCAGCAAGGGTGGTTTAGTGTGTGTTTAGCGCAACTAGGACGGACAA
Adamts4	ENSMUST00000111314	CGCGGTGGTGGTACGACATGAGGGTTGATTAGTGGTAGAAATGTGGACTTCGAGTGCCTGGCAGAGCCTCTAGGGATGTATTGAAGGAGGATAGCGCAACTAGGACGGACAA
Adamts4	ENSMUST00000111314	CGCGGTGGTGGTACGACATGAGGGATGTATTGAAGGAGGATTGACCACATCGCTGTATCCATACCTGAATTAGAGGGTTTGTAAGGTGAATAAGCGCAACTAGGACGGACAA
Adamts4	ENSMUST00000111314	CGCGGTGGTGGTACGACATGAGGGATGTATTGAAGGAGGATTGGAGGGTGACTGGGAGAACAAGGACCACAAGGGTGGTTTAGTGTGTGTTTAGCGCAACTAGGACGGACAA
Adamts4	ENSMUST00000111314	CGCGGTGGTGGTACGACATGAGAGGGTTTGTAAGGTGAATACTATTACATCATCCCTTCTCTGCCCCTTCCAGGGTTGATTAGTGGTAGAAAAGCGCAACTAGGACGGACAA
Adamts4	ENSMUST00000111314	CGCGGTGGTGGTACGACATGAGGGTGGTTTAGTGTGTGTTTCCACATTTGTCTGACTCCAAAAAGAGCATAAGGGTTGATTAGTGGTAGAAAAGCGCAACTAGGACGGACAA
Adamts4	ENSMUST00000111314	CGCGGTGGTGGTACGACATGAGAGGGTTTGTAAGGTGAATAACTGTGCCCACATCAGCCATACCCAGGGTGAGGGTGGTTTAGTGTGTGTTTAGCGCAACTAGGACGGACAA
Adamts4	ENSMUST00000111314	CGCGGTGGTGGTACGACATGAGGGATGTATTGAAGGAGGATCGAAGCGCTTGAGGAGAAGAAGAAAAAAAAAGGGTTGATTAGTGGTAGAAAAGCGCAACTAGGACGGACAA
Adamts4	ENSMUST00000111314	CGCGGTGGTGGTACGACATGAGAGGGTTTGTAAGGTGAATAGTCCCCTTTCCTGGTGCTAAATAAAAATGAAGGGATGTATTGAAGGAGGATAGCGCAACTAGGACGGACAA
Adamts4	ENSMUST00000111314	CGCGGTGGTGGTACGACATGAGGGATGTATTGAAGGAGGATAGTCTTGGGGAGGAGGGCGTGGTGTTGAAGAGGGTGGTTTAGTGTGTGTTTAGCGCAACTAGGACGGACAA
Adamts4	ENSMUST00000111314	CGCGGTGGTGGTACGACATGAGAGGGTTTGTAAGGTGAATACTGGCCCCATTCCACAGACTTGTACTCCAAAGGGTTGATTAGTGGTAGAAAAGCGCAACTAGGACGGACAA
Adamts4	ENSMUST00000111314	CGCGGTGGTGGTACGACATGAGGGTTGATTAGTGGTAGAAAAACGGCCTTTACTGTTTGAAAATCCTTGAGAGGGTGGTTTAGTGTGTGTTTAGCGCAACTAGGACGGACAA
Adamts4	ENSMUST00000111314	CGCGGTGGTGGTACGACATGAGAGGGTTTGTAAGGTGAATATCACGGAAGGTCAATGCTGAGCCGTGTGGGAGGGTGGTTTAGTGTGTGTTTAGCGCAACTAGGACGGACAA
Adamts4	ENSMUST00000111314	CGCGGTGGTGGTACGACATGAGGGATGTATTGAAGGAGGATGTCCTGAGATCTCTCTCACCTCCCTTCATTAGGGTTGATTAGTGGTAGAAAAGCGCAACTAGGACGGACAA
Adamts4	ENSMUST00000111314	CGCGGTGGTGGTACGACATGAGGGATGTATTGAAGGAGGATGTGAAGGCTGACTGGAGCCCATCATCTTCCAGAGGGTTTGTAAGGTGAATAAGCGCAACTAGGACGGACAA
Adamts4	ENSMUST00000111314	CGCGGTGGTGGTACGACATGAGGGTGGTTTAGTGTGTGTTTACAATAGCACAGCTCCTAGCTGGATCACACAGGGATGTATTGAAGGAGGATAGCGCAACTAGGACGGACAA
Adamts4	ENSMUST00000111314	CGCGGTGGTGGTACGACATGAGAGGGTTTGTAAGGTGAATAATGCTCAAAGATGCGGGGCCAGAATATAACAGGGTTGATTAGTGGTAGAAAAGCGCAACTAGGACGGACAA
Adamts4	ENSMUST00000111314	CGCGGTGGTGGTACGACATGAGGGTGGTTTAGTGTGTGTTTATCCGGTCACAGCCAGCATGGATACAGCGGAGGGTTGATTAGTGGTAGAAAAGCGCAACTAGGACGGACAA
Adamts4	ENSMUST00000111314	CGCGGTGGTGGTACGACATGAGGGTGGTTTAGTGTGTGTTTCACAGAGCAATGCTGTCAGAGCAGTTATTAAGAGGGTTTGTAAGGTGAATAAGCGCAACTAGGACGGACAA
Adamts4	ENSMUST00000111314	CGCGGTGGTGGTACGACATGAGGGATGTATTGAAGGAGGATTCTTCAGTATCTCTGCCCTGCGTTGCAGCCAGGGTTGATTAGTGGTAGAAAAGCGCAACTAGGACGGACAA
Adamts4	ENSMUST00000111314	CGCGGTGGTGGTACGACATGAGGGATGTATTGAAGGAGGATCATGCACTTGTCAAATTTCTTTTTGGAGCCAGAGGGTTTGTAAGGTGAATAAGCGCAACTAGGACGGACAA
Adra1b	ENSMUST00000167574	CGCGGTGGTGGTACGACATGAAGGGTGTGTTTGTAAAGGGTTAGGCTCAGGATGGAGGCCGTGCAACACAGATTGGAGGTGTAGGGAGTAAAAGCGCAACTAGGACGGACAA
Adra1b	ENSMUST00000167574	CGCGGTGGTGGTACGACATGAAGGGTGTGTTTGTAAAGGGTCAGATCGGGATTCATTTTAAAGTCCGCCCTATAGAGTTGATAGAGGGAGAAAGCGCAACTAGGACGGACAA
Adra1b	ENSMUST00000167574	CGCGGTGGTGGTACGACATGAAGGGTGTGTTTGTAAAGGGTGCTCTCCTTCACAAATCACTCAAAGGCGCAAGGAGTAGTTGGTTGTTAGGAAGCGCAACTAGGACGGACAA
Adra1b	ENSMUST00000167574	CGCGGTGGTGGTACGACATGATTGGAGGTGTAGGGAGTAAATCCCTCCGTGGTCTTCTTTCCAGAGGCGTCATAGAGTTGATAGAGGGAGAAAGCGCAACTAGGACGGACAA
Adra1b	ENSMUST00000167574	CGCGGTGGTGGTACGACATGATTGGAGGTGTAGGGAGTAAATTCTTAGAGTGGATTCTCAGGGTCAGCTCTAGGAGTAGTTGGTTGTTAGGAAGCGCAACTAGGACGGACAA
Adra1b	ENSMUST00000167574	CGCGGTGGTGGTACGACATGATAGAGTTGATAGAGGGAGAAATGAAGTAGTTGGTGGGCGTCCGCAGGTGCAGGAGTAGTTGGTTGTTAGGAAGCGCAACTAGGACGGACAA
Adra1b	ENSMUST00000167574	CGCGGTGGTGGTACGACATGATTGGAGGTGTAGGGAGTAAAGGCTGAGATAATTCTGGTTCAGTGTAGGATAAGGGTGTGTTTGTAAAGGGTAGCGCAACTAGGACGGACAA
Adra1b	ENSMUST00000167574	CGCGGTGGTGGTACGACATGATAGAGTTGATAGAGGGAGAAAAGGAGAGGCCCGATGGAGATGACCGTGGAAAGGGTGTGTTTGTAAAGGGTAGCGCAACTAGGACGGACAA
Adra1b	ENSMUST00000167574	CGCGGTGGTGGTACGACATGAAGGGTGTGTTTGTAAAGGGTGCCAAAATCTTAACCTCAGTCACCCATCTAAGGAGTAGTTGGTTGTTAGGAAGCGCAACTAGGACGGACAA
Adra1b	ENSMUST00000167574	CGCGGTGGTGGTACGACATGATTGGAGGTGTAGGGAGTAAAGTAGCGGAGAAGGGCAGGACTGTGAAGCTCATAGAGTTGATAGAGGGAGAAAGCGCAACTAGGACGGACAA
Adra1b	ENSMUST00000167574	CGCGGTGGTGGTACGACATGAGGAGTAGTTGGTTGTTAGGAGATCAGACCTGAAGGAAGAGGAAACACAAGATTGGAGGTGTAGGGAGTAAAAGCGCAACTAGGACGGACAA
Adra1b	ENSMUST00000167574	CGCGGTGGTGGTACGACATGAGGAGTAGTTGGTTGTTAGGAGCCCCAAAAGAAAAGTCCTAGGATTTGATCATAGAGTTGATAGAGGGAGAAAGCGCAACTAGGACGGACAA
Adra1b	ENSMUST00000167574	CGCGGTGGTGGTACGACATGATTGGAGGTGTAGGGAGTAAATTGGAGTTGGACATTTCCTTCATGACTCCCAAGGGTGTGTTTGTAAAGGGTAGCGCAACTAGGACGGACAA
Adra1b	ENSMUST00000167574	CGCGGTGGTGGTACGACATGAAGGGTGTGTTTGTAAAGGGTAGATTGGGCTCGGAAGGGCTGCGACCAAAGATAGAGTTGATAGAGGGAGAAAGCGCAACTAGGACGGACAA
Adra1b	ENSMUST00000167574	CGCGGTGGTGGTACGACATGAGGAGTAGTTGGTTGTTAGGATGTGAAGCTCAACAGCAGGTCAGCAATGGCAAGGGTGTGTTTGTAAAGGGTAGCGCAACTAGGACGGACAA
Adra1b	ENSMUST00000167574	CGCGGTGGTGGTACGACATGATAGAGTTGATAGAGGGAGAAAGGTCAGTTGTGGTGTCGCAGCCCCCATTGATTGGAGGTGTAGGGAGTAAAAGCGCAACTAGGACGGACAA
Adra1b	ENSMUST00000167574	CGCGGTGGTGGTACGACATGAGGAGTAGTTGGTTGTTAGGAGAAGGAAGAGGAAACACAAGGCTCTCCTTCATTGGAGGTGTAGGGAGTAAAAGCGCAACTAGGACGGACAA
Adra1b	ENSMUST00000167574	CGCGGTGGTGGTACGACATGATAGAGTTGATAGAGGGAGAATGGAATGGCCTTGTCTATAGTTTTTGTGGTAGGAGTAGTTGGTTGTTAGGAAGCGCAACTAGGACGGACAA
Adra1b	ENSMUST00000167574	CGCGGTGGTGGTACGACATGAAGGGTGTGTTTGTAAAGGGTCTGTTGTGGCACCTGAATACCTCTTTTAAAATTGGAGGTGTAGGGAGTAAAAGCGCAACTAGGACGGACAA
Adra1b	ENSMUST00000167574	CGCGGTGGTGGTACGACATGATAGAGTTGATAGAGGGAGAACTACAATGCCCAAGGTTTTGGCTGCTTTCTAAGGGTGTGTTTGTAAAGGGTAGCGCAACTAGGACGGACAA
Adra1b	ENSMUST00000167574	CGCGGTGGTGGTACGACATGAGGAGTAGTTGGTTGTTAGGACCCTCCCCTTTGTCCCCTTGAGACCTTGTGAAGGGTGTGTTTGTAAAGGGTAGCGCAACTAGGACGGACAA
Adra1b	ENSMUST00000167574	CGCGGTGGTGGTACGACATGATTGGAGGTGTAGGGAGTAAACACATTCTTTGTCGTCATTGGGCGCAGGTTATAGAGTTGATAGAGGGAGAAAGCGCAACTAGGACGGACAA
Adra1b	ENSMUST00000167574	CGCGGTGGTGGTACGACATGATTGGAGGTGTAGGGAGTAAATCAGTGTCTTGCTGGCCCATGCCAAAATCTAGGAGTAGTTGGTTGTTAGGAAGCGCAACTAGGACGGACAA
Adra1b	ENSMUST00000167574	CGCGGTGGTGGTACGACATGAGGAGTAGTTGGTTGTTAGGAGAAGGAGCCCAGGGAGGAAAAGAGGGCGTAATAGAGTTGATAGAGGGAGAAAGCGCAACTAGGACGGACAA
Adra1b	ENSMUST00000167574	CGCGGTGGTGGTACGACATGATTGGAGGTGTAGGGAGTAAAGCTGGCCCATGCCAAAATCTTAACCTCAGTAAGGGTGTGTTTGTAAAGGGTAGCGCAACTAGGACGGACAA
Adra1b	ENSMUST00000167574	CGCGGTGGTGGTACGACATGATAGAGTTGATAGAGGGAGAATGTTGCCCACGATGGCAAAGAGGATGAAGGAAGGGTGTGTTTGTAAAGGGTAGCGCAACTAGGACGGACAA
Adra1b	ENSMUST00000167574	CGCGGTGGTGGTACGACATGAAGGGTGTGTTTGTAAAGGGTCTCTTCGCTGTACCTGGCACCCATGCCTCTAGGAGTAGTTGGTTGTTAGGAAGCGCAACTAGGACGGACAA
Adra1b	ENSMUST00000167574	CGCGGTGGTGGTACGACATGATTGGAGGTGTAGGGAGTAAAGCTGCTTTCTTTTCCCTGGAGAACTTAAAAATAGAGTTGATAGAGGGAGAAAGCGCAACTAGGACGGACAA
Adra1b	ENSMUST00000167574	CGCGGTGGTGGTACGACATGAGGAGTAGTTGGTTGTTAGGATGCCACTGTCATCCAGAGAGTCCTTCCGCGATTGGAGGTGTAGGGAGTAAAAGCGCAACTAGGACGGACAA
Adra1b	ENSMUST00000167574	CGCGGTGGTGGTACGACATGATAGAGTTGATAGAGGGAGAATACTGCTGAGGGTGTCCTCATGAAAGTTCTAGGAGTAGTTGGTTGTTAGGAAGCGCAACTAGGACGGACAA
Adra1b	ENSMUST00000167574	CGCGGTGGTGGTACGACATGATTGGAGGTGTAGGGAGTAAAAACATTCCGACTACAATGCCCAAGGTTTTGAAGGGTGTGTTTGTAAAGGGTAGCGCAACTAGGACGGACAA
Adra1b	ENSMUST00000167574	CGCGGTGGTGGTACGACATGAAGGGTGTGTTTGTAAAGGGTTACTGCAGAGAGTATCGCACCCCAATGTAGATAGAGTTGATAGAGGGAGAAAGCGCAACTAGGACGGACAA
Adra1b	ENSMUST00000167574	CGCGGTGGTGGTACGACATGAGGAGTAGTTGGTTGTTAGGACCTAGGATTTGATCAGACCTGAAGGAAGAGAAGGGTGTGTTTGTAAAGGGTAGCGCAACTAGGACGGACAA
Adra1b	ENSMUST00000167574	CGCGGTGGTGGTACGACATGATTGGAGGTGTAGGGAGTAAAATTGACTGGAGAGCAGGGAGGGGTTTGAGAATAGAGTTGATAGAGGGAGAAAGCGCAACTAGGACGGACAA
Adra1b	ENSMUST00000167574	CGCGGTGGTGGTACGACATGAGGAGTAGTTGGTTGTTAGGAAGAGAGAGACTTAAGTCCCGGCCGGCGTAGATTGGAGGTGTAGGGAGTAAAAGCGCAACTAGGACGGACAA
Adra1b	ENSMUST00000167574	CGCGGTGGTGGTACGACATGATAGAGTTGATAGAGGGAGAAAGGGGAGCCAACATAAGATGAACATTCCGAAGGAGTAGTTGGTTGTTAGGAAGCGCAACTAGGACGGACAA
Adra1b	ENSMUST00000167574	CGCGGTGGTGGTACGACATGATTGGAGGTGTAGGGAGTAAAATGACCAAGATGTTGCCCACGATGGCAAAGAAGGGTGTGTTTGTAAAGGGTAGCGCAACTAGGACGGACAA
Adra1b	ENSMUST00000167574	CGCGGTGGTGGTACGACATGAAGGGTGTGTTTGTAAAGGGTAACAGCAGGTCAGCAATGGCCAGGTTGACAATAGAGTTGATAGAGGGAGAAAGCGCAACTAGGACGGACAA
Adra1b	ENSMUST00000167574	CGCGGTGGTGGTACGACATGAGGAGTAGTTGGTTGTTAGGATGGAGGCCGTGCAACACAGGACATCAACCGAAGGGTGTGTTTGTAAAGGGTAGCGCAACTAGGACGGACAA
Adra1b	ENSMUST00000167574	CGCGGTGGTGGTACGACATGATAGAGTTGATAGAGGGAGAAAGTGTGGAGTTGCTCGAGGTCTGGTTGGGGATTGGAGGTGTAGGGAGTAAAAGCGCAACTAGGACGGACAA
Adra1b	ENSMUST00000167574	CGCGGTGGTGGTACGACATGAGGAGTAGTTGGTTGTTAGGAGAAACACAAGGCTCTCCTTCACAAATCACTATTGGAGGTGTAGGGAGTAAAAGCGCAACTAGGACGGACAA
Adra1b	ENSMUST00000167574	CGCGGTGGTGGTACGACATGAGGAGTAGTTGGTTGTTAGGATACCTGGCACCCATGCCTCTGCCAGAAAAGATAGAGTTGATAGAGGGAGAAAGCGCAACTAGGACGGACAA
Adra1b	ENSMUST00000167574	CGCGGTGGTGGTACGACATGATTGGAGGTGTAGGGAGTAAAGTTTCCACATCTGTTGTGGCACCTGAATACAAGGGTGTGTTTGTAAAGGGTAGCGCAACTAGGACGGACAA
Adra1b	ENSMUST00000167574	CGCGGTGGTGGTACGACATGAAGGGTGTGTTTGTAAAGGGTGGTTGCAGGCCACCGACAGGATGACCAAGAATAGAGTTGATAGAGGGAGAAAGCGCAACTAGGACGGACAA
Adra1b	ENSMUST00000167574	CGCGGTGGTGGTACGACATGAAGGGTGTGTTTGTAAAGGGTCAAAGCTCCTCAGCTGCCCTGAAACTTTGCAGGAGTAGTTGGTTGTTAGGAAGCGCAACTAGGACGGACAA
Adra1b	ENSMUST00000167574	CGCGGTGGTGGTACGACATGATAGAGTTGATAGAGGGAGAATTGAATACGGCGTCCGGGGGCTTTAGGGTGATTGGAGGTGTAGGGAGTAAAAGCGCAACTAGGACGGACAA
Adra1b	ENSMUST00000167574	CGCGGTGGTGGTACGACATGATTGGAGGTGTAGGGAGTAAATGACCGTGGACAAGACCCACACACTGAGGAAGGAGTAGTTGGTTGTTAGGAAGCGCAACTAGGACGGACAA
Adra1b	ENSMUST00000167574	CGCGGTGGTGGTACGACATGATAGAGTTGATAGAGGGAGAAATGCCTCTGCCAGAAAAGCAGCTGCCCCTCAGGAGTAGTTGGTTGTTAGGAAGCGCAACTAGGACGGACAA
Adra1b	ENSMUST00000167574	CGCGGTGGTGGTACGACATGAAGGGTGTGTTTGTAAAGGGTGACCCTATCAAAGGGCCAGCATTGACTGGAATTGGAGGTGTAGGGAGTAAAAGCGCAACTAGGACGGACAA
Adra1b	ENSMUST00000167574	CGCGGTGGTGGTACGACATGATAGAGTTGATAGAGGGAGAATGAAGAGAGACCCTAAAAGTGCCCGGGCGCAAGGGTGTGTTTGTAAAGGGTAGCGCAACTAGGACGGACAA
Adra1b	ENSMUST00000167574	CGCGGTGGTGGTACGACATGAAGGGTGTGTTTGTAAAGGGTAGTATCGCACCCCAATGTAGCGGTCAATGGAGGAGTAGTTGGTTGTTAGGAAGCGCAACTAGGACGGACAA
Adra1b	ENSMUST00000167574	CGCGGTGGTGGTACGACATGATTGGAGGTGTAGGGAGTAAAGATGGTGTTCTTCCCCCAACCCCCGATGTGATAGAGTTGATAGAGGGAGAAAGCGCAACTAGGACGGACAA
Adra1b	ENSMUST00000167574	CGCGGTGGTGGTACGACATGAGGAGTAGTTGGTTGTTAGGAGAGTCCTCTGGTTTCCACATCTGTTGTGGCATTGGAGGTGTAGGGAGTAAAAGCGCAACTAGGACGGACAA
Adra1b	ENSMUST00000167574	CGCGGTGGTGGTACGACATGATAGAGTTGATAGAGGGAGAACCCTAATTGTCTGCAAATATGTGTGTGTGTAGGAGTAGTTGGTTGTTAGGAAGCGCAACTAGGACGGACAA
Adra1b	ENSMUST00000167574	CGCGGTGGTGGTACGACATGAAGGGTGTGTTTGTAAAGGGTGGTATAATGCATGGGAGGAGGTCAGAGCATATTGGAGGTGTAGGGAGTAAAAGCGCAACTAGGACGGACAA
Adra1b	ENSMUST00000167574	CGCGGTGGTGGTACGACATGAAGGGTGTGTTTGTAAAGGGTAACTTGCCAGAGTCCAGACTCTGCTTTACCATAGAGTTGATAGAGGGAGAAAGCGCAACTAGGACGGACAA
Adra1b	ENSMUST00000167574	CGCGGTGGTGGTACGACATGAGGAGTAGTTGGTTGTTAGGAAGTCCAGACTCTGCTTTACCTTGTGTGTCCAAGGGTGTGTTTGTAAAGGGTAGCGCAACTAGGACGGACAA
Adra1b	ENSMUST00000167574	CGCGGTGGTGGTACGACATGATAGAGTTGATAGAGGGAGAAGCCTCCAGATTCTTGGTGGTCCTCTTGGCCATTGGAGGTGTAGGGAGTAAAAGCGCAACTAGGACGGACAA
Adra1b	ENSMUST00000167574	CGCGGTGGTGGTACGACATGATTGGAGGTGTAGGGAGTAAAACGCAGCCCACACGTACACCAAACAGACACAGGAGTAGTTGGTTGTTAGGAAGCGCAACTAGGACGGACAA
Adra1b	ENSMUST00000167574	CGCGGTGGTGGTACGACATGATAGAGTTGATAGAGGGAGAACTGTTGAAGTAGCCCAGCCAGAACACTACCAGGAGTAGTTGGTTGTTAGGAAGCGCAACTAGGACGGACAA
Adra1b	ENSMUST00000167574	CGCGGTGGTGGTACGACATGAAGGGTGTGTTTGTAAAGGGTGAGCAGGGAGGGGTTTGAGAGGTACAAAGTATTGGAGGTGTAGGGAGTAAAAGCGCAACTAGGACGGACAA
Adra1b	ENSMUST00000167574	CGCGGTGGTGGTACGACATGATAGAGTTGATAGAGGGAGAAGGCGGGTGGATGAAGAGAGACCCTAAAAGTAAGGGTGTGTTTGTAAAGGGTAGCGCAACTAGGACGGACAA
Adra1b	ENSMUST00000167574	CGCGGTGGTGGTACGACATGAGGAGTAGTTGGTTGTTAGGATGTACCTTGGAAGTTGTGATTAACCCAGGAAAGGGTGTGTTTGTAAAGGGTAGCGCAACTAGGACGGACAA
Adra1b	ENSMUST00000167574	CGCGGTGGTGGTACGACATGATTGGAGGTGTAGGGAGTAAACATGACCAGGATGACCGCCAGTGGGATGTAATAGAGTTGATAGAGGGAGAAAGCGCAACTAGGACGGACAA
Adra1b	ENSMUST00000167574	CGCGGTGGTGGTACGACATGAGGAGTAGTTGGTTGTTAGGAGAAACTTTGCTCCCTCCGTGGTCTTCTTTCATTGGAGGTGTAGGGAGTAAAAGCGCAACTAGGACGGACAA
Adra1b	ENSMUST00000167574	CGCGGTGGTGGTACGACATGAGGAGTAGTTGGTTGTTAGGACAAAGGCGCACAGGAGAAATGATCTTTAATATAGAGTTGATAGAGGGAGAAAGCGCAACTAGGACGGACAA
Adra1b	ENSMUST00000167574	CGCGGTGGTGGTACGACATGATTGGAGGTGTAGGGAGTAAACCAAGATAAGGGACCCTAATTGTCTGCAAAAAGGGTGTGTTTGTAAAGGGTAGCGCAACTAGGACGGACAA
Adra1b	ENSMUST00000167574	CGCGGTGGTGGTACGACATGAAGGGTGTGTTTGTAAAGGGTCAACACAGGACATCAACCGCTGCCCAGATGATAGAGTTGATAGAGGGAGAAAGCGCAACTAGGACGGACAA
Adra1b	ENSMUST00000167574	CGCGGTGGTGGTACGACATGAAGGGTGTGTTTGTAAAGGGTAGGATACTTGTGTACCTTGGAAGTTGTGATAGGAGTAGTTGGTTGTTAGGAAGCGCAACTAGGACGGACAA
Adra1b	ENSMUST00000167574	CGCGGTGGTGGTACGACATGATAGAGTTGATAGAGGGAGAAATAGCCAGGGAGGAGATTGGGCTCGGAAGGATTGGAGGTGTAGGGAGTAAAAGCGCAACTAGGACGGACAA
Adra1b	ENSMUST00000167574	CGCGGTGGTGGTACGACATGATTGGAGGTGTAGGGAGTAAACCGATGGAGATGACCGTGGACAAGACCCACAGGAGTAGTTGGTTGTTAGGAAGCGCAACTAGGACGGACAA
Adra1b	ENSMUST00000167574	CGCGGTGGTGGTACGACATGAGGAGTAGTTGGTTGTTAGGAGGATTCTCAGGGTCAGCTCTTTGGAGTTGGATAGAGTTGATAGAGGGAGAAAGCGCAACTAGGACGGACAA
Adra1b	ENSMUST00000167574	CGCGGTGGTGGTACGACATGAAGGGTGTGTTTGTAAAGGGTTCTACTCAGGACTGACACACTCCCCCCACGATTGGAGGTGTAGGGAGTAAAAGCGCAACTAGGACGGACAA
Adra1b	ENSMUST00000167574	CGCGGTGGTGGTACGACATGATAGAGTTGATAGAGGGAGAACAGCAATGGCCAGGTTGACAATGAAGTAGTAAGGGTGTGTTTGTAAAGGGTAGCGCAACTAGGACGGACAA
Adra1b	ENSMUST00000167574	CGCGGTGGTGGTACGACATGAAGGGTGTGTTTGTAAAGGGTGTGTGTACTTTTTGGAATGGCCTTGTCTATAGGAGTAGTTGGTTGTTAGGAAGCGCAACTAGGACGGACAA
Adra1b	ENSMUST00000167574	CGCGGTGGTGGTACGACATGATAGAGTTGATAGAGGGAGAAGATACGCATGAAGGCGCGTTTGAACTCCTTATTGGAGGTGTAGGGAGTAAAAGCGCAACTAGGACGGACAA
Adra1b	ENSMUST00000167574	CGCGGTGGTGGTACGACATGAGGAGTAGTTGGTTGTTAGGAACGATGTAGACTCGGCAGTACATGACCAGGATTGGAGGTGTAGGGAGTAAAAGCGCAACTAGGACGGACAA
Adra1b	ENSMUST00000167574	CGCGGTGGTGGTACGACATGATAGAGTTGATAGAGGGAGAACCTCAGTCACCCATCTATAAAAACCAGGACAGGAGTAGTTGGTTGTTAGGAAGCGCAACTAGGACGGACAA
Adra1b	ENSMUST00000167574	CGCGGTGGTGGTACGACATGATTGGAGGTGTAGGGAGTAAAAGAGGGCGTAGAAGGGTTCTTCTGTGACCCAAGGGTGTGTTTGTAAAGGGTAGCGCAACTAGGACGGACAA
Adra1b	ENSMUST00000167574	CGCGGTGGTGGTACGACATGATAGAGTTGATAGAGGGAGAAACAGGGAGCCAAGTGGGAGAGCGATGAAGAAAGGGTGTGTTTGTAAAGGGTAGCGCAACTAGGACGGACAA
Adra1b	ENSMUST00000167574	CGCGGTGGTGGTACGACATGAGGAGTAGTTGGTTGTTAGGAAAGTTGGCATCTTTCAACTCTCCCCAGTGGAAGGGTGTGTTTGTAAAGGGTAGCGCAACTAGGACGGACAA
Adra1b	ENSMUST00000167574	CGCGGTGGTGGTACGACATGATTGGAGGTGTAGGGAGTAAATATGGAACTCCTGGGGTTGTGGCCCTTGGCATAGAGTTGATAGAGGGAGAAAGCGCAACTAGGACGGACAA
Adra1b	ENSMUST00000167574	CGCGGTGGTGGTACGACATGATTGGAGGTGTAGGGAGTAAATCACAGAAGATGCGCCCCAGCACCCAGTAGAGGAGTAGTTGGTTGTTAGGAAGCGCAACTAGGACGGACAA
Adra1b	ENSMUST00000167574	CGCGGTGGTGGTACGACATGATAGAGTTGATAGAGGGAGAACAAGGTTTTGGCTGCTTTCTTTTCCCTGGAAGGAGTAGTTGGTTGTTAGGAAGCGCAACTAGGACGGACAA
Adra1b	ENSMUST00000167574	CGCGGTGGTGGTACGACATGAAGGGTGTGTTTGTAAAGGGTGGTGTCCTCATGAAAGTTCTTAGAGTGGATATTGGAGGTGTAGGGAGTAAAAGCGCAACTAGGACGGACAA
Adra1b	ENSMUST00000167574	CGCGGTGGTGGTACGACATGAAGGGTGTGTTTGTAAAGGGTGGGTTTGAGAGGTACAAAGTCAAGAAACAAATAGAGTTGATAGAGGGAGAAAGCGCAACTAGGACGGACAA
Adra1b	ENSMUST00000167574	CGCGGTGGTGGTACGACATGAGGAGTAGTTGGTTGTTAGGACTCATGCAGCTGCCACTGTCATCCAGAGAGAAGGGTGTGTTTGTAAAGGGTAGCGCAACTAGGACGGACAA
Adra1b	ENSMUST00000167574	CGCGGTGGTGGTACGACATGATAGAGTTGATAGAGGGAGAAAACAAACAACACACCTAGACATCACCAGGGATTGGAGGTGTAGGGAGTAAAAGCGCAACTAGGACGGACAA
Adra1b	ENSMUST00000167574	CGCGGTGGTGGTACGACATGATTGGAGGTGTAGGGAGTAAAGTTGTGGCCCTTGGCCTTGGTACTGCTGAGAGGAGTAGTTGGTTGTTAGGAAGCGCAACTAGGACGGACAA
Adra1b	ENSMUST00000167574	CGCGGTGGTGGTACGACATGAGGAGTAGTTGGTTGTTAGGACTTTACCTGCTCAGTGTCTTGCTGGCCCATATAGAGTTGATAGAGGGAGAAAGCGCAACTAGGACGGACAA
Adra1b	ENSMUST00000167574	CGCGGTGGTGGTACGACATGAAGGGTGTGTTTGTAAAGGGTGTGGGATGTAGAAGGAGCCCAGGGAGGAAAATTGGAGGTGTAGGGAGTAAAAGCGCAACTAGGACGGACAA
Adra1b	ENSMUST00000167574	CGCGGTGGTGGTACGACATGAAGGGTGTGTTTGTAAAGGGTACCAGGACTTGGCTGAGATAATTCTGGTTCATAGAGTTGATAGAGGGAGAAAGCGCAACTAGGACGGACAA
Alk	ENSMUST00000086639	CGCGGTGGTGGTACGACATGAGGGAGAATGAGGTGTAATGTATGATCACAGAAGCAGATGACTTTGTGGCTATGAAAGGAATGGGTTGTGGTAGCGCAACTAGGACGGACAA
Alk	ENSMUST00000086639	CGCGGTGGTGGTACGACATGATGAAAGGAATGGGTTGTGGTGGCTCAGAATGGTATGCTTGGAATCTGCAGATGTGGTTTGGAGATGATAGAAGCGCAACTAGGACGGACAA
Alk	ENSMUST00000086639	CGCGGTGGTGGTACGACATGAGAGATTAGAGATGAGTTGGACCAAATCTGGACTCCCTTCAAGGGCCCTTCATGAAAGGAATGGGTTGTGGTAGCGCAACTAGGACGGACAA
Alk	ENSMUST00000086639	CGCGGTGGTGGTACGACATGAGGGAGAATGAGGTGTAATGTAGCCAGTGAACTGTAGGGTCGAAGATGGGAATGTGGTTTGGAGATGATAGAAGCGCAACTAGGACGGACAA
Alk	ENSMUST00000086639	CGCGGTGGTGGTACGACATGAGGGAGAATGAGGTGTAATGTCTGGTAGGCGTTGTTGCACTGTGCCTGGGTAGAGATTAGAGATGAGTTGGAAGCGCAACTAGGACGGACAA
Alk	ENSMUST00000086639	CGCGGTGGTGGTACGACATGAGAGATTAGAGATGAGTTGGAAAAGACTTTCCGGCCCAGAGCAAGGAAGTGATGTGGTTTGGAGATGATAGAAGCGCAACTAGGACGGACAA
Alk	ENSMUST00000086639	CGCGGTGGTGGTACGACATGATGAAAGGAATGGGTTGTGGTGAATCTCTCTTCCAGCTTCGTTGTGGGGTAAGGGAGAATGAGGTGTAATGTAGCGCAACTAGGACGGACAA
Alk	ENSMUST00000086639	CGCGGTGGTGGTACGACATGATGAAAGGAATGGGTTGTGGTTTTCTGGATCCCGGGCCTTTGTGCAGCTCCATGTGGTTTGGAGATGATAGAAGCGCAACTAGGACGGACAA
Alk	ENSMUST00000086639	CGCGGTGGTGGTACGACATGATGAAAGGAATGGGTTGTGGTGGCCTAGGCCCCGGATGAGTGTGATGTTTTAGAGATTAGAGATGAGTTGGAAGCGCAACTAGGACGGACAA
Alk	ENSMUST00000086639	CGCGGTGGTGGTACGACATGAGGGAGAATGAGGTGTAATGTGAGGTTGAACTGGAGTATCCCCACAGCCGCATGTGGTTTGGAGATGATAGAAGCGCAACTAGGACGGACAA
Alk	ENSMUST00000086639	CGCGGTGGTGGTACGACATGAGAGATTAGAGATGAGTTGGAAGTTACTCTCCAGTCTCTCTGGGTGGAACGAGGGAGAATGAGGTGTAATGTAGCGCAACTAGGACGGACAA
Alk	ENSMUST00000086639	CGCGGTGGTGGTACGACATGATGTGGTTTGGAGATGATAGACTGGGGTACGGCATATATCCAAGAGAAAATAGAGATTAGAGATGAGTTGGAAGCGCAACTAGGACGGACAA
Alk	ENSMUST00000086639	CGCGGTGGTGGTACGACATGATGAAAGGAATGGGTTGTGGTATATCCTCCGCCTCCTCCACCTGAGGAGCAAGGGAGAATGAGGTGTAATGTAGCGCAACTAGGACGGACAA
Alk	ENSMUST00000086639	CGCGGTGGTGGTACGACATGATGTGGTTTGGAGATGATAGACATGAAGGTACCAGGAGGAGAAGGCGTTTCATGAAAGGAATGGGTTGTGGTAGCGCAACTAGGACGGACAA
Alk	ENSMUST00000086639	CGCGGTGGTGGTACGACATGAGAGATTAGAGATGAGTTGGATCCCGGTGGATAAAGTGATTCTCCTCTAGGATGAAAGGAATGGGTTGTGGTAGCGCAACTAGGACGGACAA
Alk	ENSMUST00000086639	CGCGGTGGTGGTACGACATGAGGGAGAATGAGGTGTAATGTTTCCAAGGGGAGACCCTGTTGCTGGTAACCATGTGGTTTGGAGATGATAGAAGCGCAACTAGGACGGACAA
Alk	ENSMUST00000086639	CGCGGTGGTGGTACGACATGAGGGAGAATGAGGTGTAATGTTTCTCAGGCATCAGGCGGATCCTCAGCCTCAGAGATTAGAGATGAGTTGGAAGCGCAACTAGGACGGACAA
Alk	ENSMUST00000086639	CGCGGTGGTGGTACGACATGAGAGATTAGAGATGAGTTGGAGTGGAGAATCCACCAGCTGAACAGCTCGCTATGTGGTTTGGAGATGATAGAAGCGCAACTAGGACGGACAA
Alk	ENSMUST00000086639	CGCGGTGGTGGTACGACATGATGAAAGGAATGGGTTGTGGTAGAGATACGTTTCCTCTCAAAACCCCGCGGAGGGAGAATGAGGTGTAATGTAGCGCAACTAGGACGGACAA
Alk	ENSMUST00000086639	CGCGGTGGTGGTACGACATGATGTGGTTTGGAGATGATAGACCAGCAGGAAGTTTACTGCACAGCTGGCCCATGAAAGGAATGGGTTGTGGTAGCGCAACTAGGACGGACAA
Alk	ENSMUST00000086639	CGCGGTGGTGGTACGACATGAGAGATTAGAGATGAGTTGGACGATGCAGCGAACAATATTCTGGTGGTTGAATGAAAGGAATGGGTTGTGGTAGCGCAACTAGGACGGACAA
Alk	ENSMUST00000086639	CGCGGTGGTGGTACGACATGATGTGGTTTGGAGATGATAGAATAGTTGACATTGCCGCAGGGGAAGTGGCGAGGGAGAATGAGGTGTAATGTAGCGCAACTAGGACGGACAA
Alk	ENSMUST00000086639	CGCGGTGGTGGTACGACATGAGGGAGAATGAGGTGTAATGTATGAGCCAGGACATGCGGAGCTCACAAGGAAGAGATTAGAGATGAGTTGGAAGCGCAACTAGGACGGACAA
Alk	ENSMUST00000086639	CGCGGTGGTGGTACGACATGATGTGGTTTGGAGATGATAGAGGCTTGGGTCATTGGGCATTCCAGACACCTAGAGATTAGAGATGAGTTGGAAGCGCAACTAGGACGGACAA
Alk	ENSMUST00000086639	CGCGGTGGTGGTACGACATGATGAAAGGAATGGGTTGTGGTGCTTCTGTTCACTCGGATCTCTTCTTCTATAGGGAGAATGAGGTGTAATGTAGCGCAACTAGGACGGACAA
Alk	ENSMUST00000086639	CGCGGTGGTGGTACGACATGATGTGGTTTGGAGATGATAGACCCTTGCTGACCGACAAGGATGTAGAGTGTATGAAAGGAATGGGTTGTGGTAGCGCAACTAGGACGGACAA
Alk	ENSMUST00000086639	CGCGGTGGTGGTACGACATGAGAGATTAGAGATGAGTTGGAATGAAGCGGGGCAGGGCTTGTAGACTCACCATGAAAGGAATGGGTTGTGGTAGCGCAACTAGGACGGACAA
Alk	ENSMUST00000086639	CGCGGTGGTGGTACGACATGAGGGAGAATGAGGTGTAATGTTACGAGGCTGCTGCCAAAAGCAGTGGAGGCATGTGGTTTGGAGATGATAGAAGCGCAACTAGGACGGACAA
Alk	ENSMUST00000086639	CGCGGTGGTGGTACGACATGAGAGATTAGAGATGAGTTGGAGACTCCTTGTTTGGGTTTTTCTCAAACAGAAGGGAGAATGAGGTGTAATGTAGCGCAACTAGGACGGACAA
Alk	ENSMUST00000086639	CGCGGTGGTGGTACGACATGAGAGATTAGAGATGAGTTGGAATTCGATGGGCAGAGCTGTGTTGATCACATATGTGGTTTGGAGATGATAGAAGCGCAACTAGGACGGACAA
Alk	ENSMUST00000086639	CGCGGTGGTGGTACGACATGATGAAAGGAATGGGTTGTGGTTTCCTCTGCAGGCGCGAATAACTGAGCGGCAGGGAGAATGAGGTGTAATGTAGCGCAACTAGGACGGACAA
Alk	ENSMUST00000086639	CGCGGTGGTGGTACGACATGATGTGGTTTGGAGATGATAGAGACAGACACGCCATGGGACCGCATCATGGTATGAAAGGAATGGGTTGTGGTAGCGCAACTAGGACGGACAA
Alk	ENSMUST00000086639	CGCGGTGGTGGTACGACATGAGAGATTAGAGATGAGTTGGACTGGTCACTGTTGCACCTTCAGAAGCGAGGATGAAAGGAATGGGTTGTGGTAGCGCAACTAGGACGGACAA
Alk	ENSMUST00000086639	CGCGGTGGTGGTACGACATGATGTGGTTTGGAGATGATAGATCCTTTCCGGTTTTGTTCTCCACCAGCACCAGGGAGAATGAGGTGTAATGTAGCGCAACTAGGACGGACAA
Alk	ENSMUST00000086639	CGCGGTGGTGGTACGACATGAGGGAGAATGAGGTGTAATGTTGAAGGCTTCAGGGGGCATCCACTTGACCGAGAGATTAGAGATGAGTTGGAAGCGCAACTAGGACGGACAA
Alk	ENSMUST00000086639	CGCGGTGGTGGTACGACATGAGAGATTAGAGATGAGTTGGACTGGCAGCGTCTTTACAGCCACTTGTAGAGATGTGGTTTGGAGATGATAGAAGCGCAACTAGGACGGACAA
Alk	ENSMUST00000086639	CGCGGTGGTGGTACGACATGATGAAAGGAATGGGTTGTGGTGTTCTTCAGGGCAAAGAAATCCACCGCCGAAGGGAGAATGAGGTGTAATGTAGCGCAACTAGGACGGACAA
Alk	ENSMUST00000086639	CGCGGTGGTGGTACGACATGATGAAAGGAATGGGTTGTGGTGGAGCTGGGCAACATATCTCCCCGAAGGCTATGTGGTTTGGAGATGATAGAAGCGCAACTAGGACGGACAA
Alk	ENSMUST00000086639	CGCGGTGGTGGTACGACATGAGAGATTAGAGATGAGTTGGAAGCAAAGGTGGCATCCCCTCGGGGTCTTTGATGAAAGGAATGGGTTGTGGTAGCGCAACTAGGACGGACAA
Alk	ENSMUST00000086639	CGCGGTGGTGGTACGACATGAGGGAGAATGAGGTGTAATGTGAGGGTACAACGAAGTCCACTGCCAGACTCATGTGGTTTGGAGATGATAGAAGCGCAACTAGGACGGACAA
Alk	ENSMUST00000086639	CGCGGTGGTGGTACGACATGAGAGATTAGAGATGAGTTGGACAGAGCCACTCGAAATGGGTTTGCTGGGCGAGGGAGAATGAGGTGTAATGTAGCGCAACTAGGACGGACAA
Alk	ENSMUST00000086639	CGCGGTGGTGGTACGACATGATGTGGTTTGGAGATGATAGAGTTCCATCTGCATAGCCTGCAACTCCTGGTAGAGATTAGAGATGAGTTGGAAGCGCAACTAGGACGGACAA
Alk	ENSMUST00000086639	CGCGGTGGTGGTACGACATGATGAAAGGAATGGGTTGTGGTAGGAGACACCATCATCAGCCAGCACGGTCCAGGGAGAATGAGGTGTAATGTAGCGCAACTAGGACGGACAA
Alk	ENSMUST00000086639	CGCGGTGGTGGTACGACATGATGTGGTTTGGAGATGATAGAATGGCGCAGCCTCCCTTTCGGTAGTAGCTGATGAAAGGAATGGGTTGTGGTAGCGCAACTAGGACGGACAA
Alk	ENSMUST00000086639	CGCGGTGGTGGTACGACATGATGAAAGGAATGGGTTGTGGTGGTGTACAGGATACCCAATGGACTGATGAAAGAGATTAGAGATGAGTTGGAAGCGCAACTAGGACGGACAA
Alk	ENSMUST00000086639	CGCGGTGGTGGTACGACATGATGTGGTTTGGAGATGATAGATGCAGTGATCACTACTGCTCCTCATCCATGAGGGAGAATGAGGTGTAATGTAGCGCAACTAGGACGGACAA
Alk	ENSMUST00000086639	CGCGGTGGTGGTACGACATGAGAGATTAGAGATGAGTTGGAAGCCTGAACAGCGGCACCTCCTTCATGGTGAGGGAGAATGAGGTGTAATGTAGCGCAACTAGGACGGACAA
Alk	ENSMUST00000086639	CGCGGTGGTGGTACGACATGATGTGGTTTGGAGATGATAGATACTGACAGCCACAGGCAATGTCCCGAGCCAGAGATTAGAGATGAGTTGGAAGCGCAACTAGGACGGACAA
Alk	ENSMUST00000086639	CGCGGTGGTGGTACGACATGATGAAAGGAATGGGTTGTGGTACAAACTCCAGAACTTCCTGGTTGCTCTTGAGGGAGAATGAGGTGTAATGTAGCGCAACTAGGACGGACAA
Alk	ENSMUST00000086639	CGCGGTGGTGGTACGACATGATGAAAGGAATGGGTTGTGGTAAGATCTGGAAGAGAAGGCGGGGCTGGGAGATGTGGTTTGGAGATGATAGAAGCGCAACTAGGACGGACAA
Alk	ENSMUST00000086639	CGCGGTGGTGGTACGACATGATGAAAGGAATGGGTTGTGGTAAATCACAGGCTTGCCCGAGCTGGAGGACGAGAGATTAGAGATGAGTTGGAAGCGCAACTAGGACGGACAA
Alk	ENSMUST00000086639	CGCGGTGGTGGTACGACATGATGTGGTTTGGAGATGATAGATCCGTGGCACTTCTTTCAGGTCACTGATGGAGGGAGAATGAGGTGTAATGTAGCGCAACTAGGACGGACAA
Alk	ENSMUST00000086639	CGCGGTGGTGGTACGACATGAGGGAGAATGAGGTGTAATGTCCAAAATGATGGCGAAGTTGGGTCTGTCTTAGAGATTAGAGATGAGTTGGAAGCGCAACTAGGACGGACAA
Alk	ENSMUST00000086639	CGCGGTGGTGGTACGACATGAGAGATTAGAGATGAGTTGGACGGGGTCCTGGGTGCAGTATTCGATCCTCTATGTGGTTTGGAGATGATAGAAGCGCAACTAGGACGGACAA
Alk	ENSMUST00000086639	CGCGGTGGTGGTACGACATGATGAAAGGAATGGGTTGTGGTAGAGGATCAATGAGAGCGGCAGGTGGGGCTAGGGAGAATGAGGTGTAATGTAGCGCAACTAGGACGGACAA
Alk	ENSMUST00000086639	CGCGGTGGTGGTACGACATGATGAAAGGAATGGGTTGTGGTCGGAATTGCCGTTCAGCCCTAGAACCGAGGATGTGGTTTGGAGATGATAGAAGCGCAACTAGGACGGACAA
Alk	ENSMUST00000086639	CGCGGTGGTGGTACGACATGATGAAAGGAATGGGTTGTGGTAAGAATCGTCTCCTCGCCCAGCTCCAGCACAGAGATTAGAGATGAGTTGGAAGCGCAACTAGGACGGACAA
Alk	ENSMUST00000086639	CGCGGTGGTGGTACGACATGATGTGGTTTGGAGATGATAGAGCTTGCTCAGCTTATACTCGGGGCTCTGCAAGGGAGAATGAGGTGTAATGTAGCGCAACTAGGACGGACAA
Alk	ENSMUST00000086639	CGCGGTGGTGGTACGACATGAGAGATTAGAGATGAGTTGGATCCGGTATACAGGCCCGGGGCAGTTCTTAGAGGGAGAATGAGGTGTAATGTAGCGCAACTAGGACGGACAA
Alk	ENSMUST00000086639	CGCGGTGGTGGTACGACATGAGAGATTAGAGATGAGTTGGACTTTCTCCTCCTCTTCTACTACTGGACCGTATGTGGTTTGGAGATGATAGAAGCGCAACTAGGACGGACAA
Alk	ENSMUST00000086639	CGCGGTGGTGGTACGACATGAGGGAGAATGAGGTGTAATGTAGAAAGCCATGTTCACGTGGCCCCGATCGGATGAAAGGAATGGGTTGTGGTAGCGCAACTAGGACGGACAA
Alk	ENSMUST00000086639	CGCGGTGGTGGTACGACATGATGTGGTTTGGAGATGATAGAGGAGTCTTTCATCGTCCAGGTCAGATTCCAATGAAAGGAATGGGTTGTGGTAGCGCAACTAGGACGGACAA
Alk	ENSMUST00000086639	CGCGGTGGTGGTACGACATGAGAGATTAGAGATGAGTTGGATGTAGTCGGTCATGATGGTCGAGGTCCGTAATGAAAGGAATGGGTTGTGGTAGCGCAACTAGGACGGACAA
Alk	ENSMUST00000086639	CGCGGTGGTGGTACGACATGAGGGAGAATGAGGTGTAATGTGTCACCTTTCTCCAGATTGAAGATGCCCAGATGTGGTTTGGAGATGATAGAAGCGCAACTAGGACGGACAA
Alk	ENSMUST00000086639	CGCGGTGGTGGTACGACATGAGAGATTAGAGATGAGTTGGAGAATTTTTCATTGGTGCAGGGAAGGTGGCAAGGGAGAATGAGGTGTAATGTAGCGCAACTAGGACGGACAA
Alk	ENSMUST00000086639	CGCGGTGGTGGTACGACATGAGAGATTAGAGATGAGTTGGAGGCCTTCATACACCTCCCCAAATGCGCCATATGTGGTTTGGAGATGATAGAAGCGCAACTAGGACGGACAA
Alk	ENSMUST00000086639	CGCGGTGGTGGTACGACATGAGGGAGAATGAGGTGTAATGTATTGTTCTCACCCACACAGACTTTCTGGATATGAAAGGAATGGGTTGTGGTAGCGCAACTAGGACGGACAA
Alk	ENSMUST00000086639	CGCGGTGGTGGTACGACATGATGTGGTTTGGAGATGATAGATACCTCCTCTGGGGGACCAATACAGCCTTCATGAAAGGAATGGGTTGTGGTAGCGCAACTAGGACGGACAA
Alk	ENSMUST00000086639	CGCGGTGGTGGTACGACATGATGAAAGGAATGGGTTGTGGTCAGGCTGATGCTGCCAGCACTGCGTCATTAAGAGATTAGAGATGAGTTGGAAGCGCAACTAGGACGGACAA
Alk	ENSMUST00000086639	CGCGGTGGTGGTACGACATGAGGGAGAATGAGGTGTAATGTATGTCAGTGGTGCTGAGCAACAGGGCACGGATGTGGTTTGGAGATGATAGAAGCGCAACTAGGACGGACAA
Alk	ENSMUST00000086639	CGCGGTGGTGGTACGACATGAGAGATTAGAGATGAGTTGGATAGTTGGTTTGCCCTGGGACAGGCATCCTCAGGGAGAATGAGGTGTAATGTAGCGCAACTAGGACGGACAA
Alk	ENSMUST00000086639	CGCGGTGGTGGTACGACATGAGAGATTAGAGATGAGTTGGAGCCACAGAAGCCATTTTCAAAGTTACAGTAATGTGGTTTGGAGATGATAGAAGCGCAACTAGGACGGACAA
Alk	ENSMUST00000086639	CGCGGTGGTGGTACGACATGAGGGAGAATGAGGTGTAATGTAGGTGTTCAGGAGGAGGAAGGAGCCTCTGGATGAAAGGAATGGGTTGTGGTAGCGCAACTAGGACGGACAA
Alk	ENSMUST00000086639	CGCGGTGGTGGTACGACATGATGTGGTTTGGAGATGATAGAATATCGACTGCGGTGGGAAAGGAAAGGGAAATGAAAGGAATGGGTTGTGGTAGCGCAACTAGGACGGACAA
Alk	ENSMUST00000086639	CGCGGTGGTGGTACGACATGAGAGATTAGAGATGAGTTGGAACAGGGGAAGTCAAAGCTGCACTCCAGACCATGAAAGGAATGGGTTGTGGTAGCGCAACTAGGACGGACAA
Alk	ENSMUST00000086639	CGCGGTGGTGGTACGACATGAGGGAGAATGAGGTGTAATGTCTGTAGATATCTCGGGCCATCCCAAAGTCTATGTGGTTTGGAGATGATAGAAGCGCAACTAGGACGGACAA
Alk	ENSMUST00000086639	CGCGGTGGTGGTACGACATGAGAGATTAGAGATGAGTTGGAACTTCCCACCACCACGCTCAAGTTGGAATTAGGGAGAATGAGGTGTAATGTAGCGCAACTAGGACGGACAA
Alk	ENSMUST00000086639	CGCGGTGGTGGTACGACATGATGTGGTTTGGAGATGATAGACCTGTCAGTCACATCGAGGAGGGACAGCACAGAGATTAGAGATGAGTTGGAAGCGCAACTAGGACGGACAA
Alk	ENSMUST00000086639	CGCGGTGGTGGTACGACATGATGAAAGGAATGGGTTGTGGTTCCATCTGCCCAGGAGATTCCAGGCAGTGGAGGGAGAATGAGGTGTAATGTAGCGCAACTAGGACGGACAA
Alk	ENSMUST00000086639	CGCGGTGGTGGTACGACATGATGAAAGGAATGGGTTGTGGTATTTGCTGATGATCAGAGCTTCCATGAGAAATGTGGTTTGGAGATGATAGAAGCGCAACTAGGACGGACAA
Alk	ENSMUST00000086639	CGCGGTGGTGGTACGACATGAGAGATTAGAGATGAGTTGGAGTTGTGCAGGGGAGGAGAATATTCCAGCTCATGAAAGGAATGGGTTGTGGTAGCGCAACTAGGACGGACAA
Alk	ENSMUST00000086639	CGCGGTGGTGGTACGACATGAGGGAGAATGAGGTGTAATGTAGTCCAGCTCATCTTGTTCTGAACACACTTATGTGGTTTGGAGATGATAGAAGCGCAACTAGGACGGACAA
Alk	ENSMUST00000086639	CGCGGTGGTGGTACGACATGAGAGATTAGAGATGAGTTGGATTATCATTCCAGCCGCCTCCACCACCTGCGAGGGAGAATGAGGTGTAATGTAGCGCAACTAGGACGGACAA
Alk	ENSMUST00000086639	CGCGGTGGTGGTACGACATGATGTGGTTTGGAGATGATAGATTTCTGTCTTGGCCCCATAGGCCCTGCCACAGAGATTAGAGATGAGTTGGAAGCGCAACTAGGACGGACAA
Alk	ENSMUST00000086639	CGCGGTGGTGGTACGACATGAGGGAGAATGAGGTGTAATGTCAAGCTCCGGTTGCCACTGGAGATGTATTCATGAAAGGAATGGGTTGTGGTAGCGCAACTAGGACGGACAA
Alk	ENSMUST00000086639	CGCGGTGGTGGTACGACATGATGTGGTTTGGAGATGATAGACATATGGGGTGAGAGTGGACTTTGGGTCCAATGAAAGGAATGGGTTGTGGTAGCGCAACTAGGACGGACAA
Alk	ENSMUST00000086639	CGCGGTGGTGGTACGACATGATGAAAGGAATGGGTTGTGGTGTCAAATCCCACGGTTGCCCTGGATCCTGGAGAGATTAGAGATGAGTTGGAAGCGCAACTAGGACGGACAA
Alk	ENSMUST00000086639	CGCGGTGGTGGTACGACATGAGGGAGAATGAGGTGTAATGTATAGCCTTCCCTCCCTGCCCACTTCCGATGATGTGGTTTGGAGATGATAGAAGCGCAACTAGGACGGACAA
Alk	ENSMUST00000086639	CGCGGTGGTGGTACGACATGAGGGAGAATGAGGTGTAATGTGGAAACCCCATCTTCCCCATCCATTTCGGGAGAGATTAGAGATGAGTTGGAAGCGCAACTAGGACGGACAA
Alk	ENSMUST00000086639	CGCGGTGGTGGTACGACATGATGTGGTTTGGAGATGATAGAAAGGTAGCAGTCGAGGCTGATGGAAATGTTAGAGATTAGAGATGAGTTGGAAGCGCAACTAGGACGGACAA
Alk	ENSMUST00000086639	CGCGGTGGTGGTACGACATGATGAAAGGAATGGGTTGTGGTGTCATTGTTTGATGCTGCGTTGCCACCTATAGGGAGAATGAGGTGTAATGTAGCGCAACTAGGACGGACAA
Alk	ENSMUST00000086639	CGCGGTGGTGGTACGACATGATGAAAGGAATGGGTTGTGGTTTGAGGTCTCCGCCAGCCATGAGTTCCAGCATGTGGTTTGGAGATGATAGAAGCGCAACTAGGACGGACAA
Ankfn1	ENSMUST00000169201	CGCGGTGGTGGTACGACATGAAGAGTGAGTAGTAGTGGAGTTGGCTTCGTTGCCCTGGAAGTTCACAGAAGAGGGATGTATTGAAGGAGGATAGCGCAACTAGGACGGACAA
Ankfn1	ENSMUST00000169201	CGCGGTGGTGGTACGACATGAAGGAGGAGGGTAATGATAGAGTTGGCTCTTCGGGTGTTGACAGAGACTTCAGGGATGTATTGAAGGAGGATAGCGCAACTAGGACGGACAA
Ankfn1	ENSMUST00000169201	CGCGGTGGTGGTACGACATGAGGGATGTATTGAAGGAGGATAGCAAGAGAAGAAAGGACACATTGTGACCAAAGTTGAGGTGGGAGAGTATTAGCGCAACTAGGACGGACAA
Ankfn1	ENSMUST00000169201	CGCGGTGGTGGTACGACATGAAGAGTGAGTAGTAGTGGAGTGAGGAGGAGTTGCACAGCATCTAGGTCCTGAAGGAGGAGGGTAATGATAGAAGCGCAACTAGGACGGACAA
Ankfn1	ENSMUST00000169201	CGCGGTGGTGGTACGACATGAAGTTGAGGTGGGAGAGTATTCTTTGCCTCAGCCACCTGATGTCTTCCCACAAGAGTGAGTAGTAGTGGAGTAGCGCAACTAGGACGGACAA
Ankfn1	ENSMUST00000169201	CGCGGTGGTGGTACGACATGAAGGAGGAGGGTAATGATAGAAATGTTGTGGTTTTCACGGATCTTCACGTGAAGTTGAGGTGGGAGAGTATTAGCGCAACTAGGACGGACAA
Ankfn1	ENSMUST00000169201	CGCGGTGGTGGTACGACATGAAGAGTGAGTAGTAGTGGAGTAGGATTATTCTGTCCTGGGGCTGTACAGACAGGGATGTATTGAAGGAGGATAGCGCAACTAGGACGGACAA
Ankfn1	ENSMUST00000169201	CGCGGTGGTGGTACGACATGAAGGAGGAGGGTAATGATAGATCCAGAACCTCACTCTGTCCCTTGTGTCTGAGGGATGTATTGAAGGAGGATAGCGCAACTAGGACGGACAA
Ankfn1	ENSMUST00000169201	CGCGGTGGTGGTACGACATGAGGGATGTATTGAAGGAGGATCGCAATGGGCACGTTGTTGGTCATGATGGCAAGTTGAGGTGGGAGAGTATTAGCGCAACTAGGACGGACAA
Ankfn1	ENSMUST00000169201	CGCGGTGGTGGTACGACATGAAGGAGGAGGGTAATGATAGATCTCCTGTAGCTCAGCCTCTGCGCAAAGCAAAGAGTGAGTAGTAGTGGAGTAGCGCAACTAGGACGGACAA
Ankfn1	ENSMUST00000169201	CGCGGTGGTGGTACGACATGAAGTTGAGGTGGGAGAGTATTTTTCCAGTTGGAGGGGGAGGCACACACTGGAAGAGTGAGTAGTAGTGGAGTAGCGCAACTAGGACGGACAA
Ankfn1	ENSMUST00000169201	CGCGGTGGTGGTACGACATGAAGGAGGAGGGTAATGATAGAAGTCCTGTGATTGTACACCTCAGGGTCTGCAAGTTGAGGTGGGAGAGTATTAGCGCAACTAGGACGGACAA
Ankfn1	ENSMUST00000169201	CGCGGTGGTGGTACGACATGAAGAGTGAGTAGTAGTGGAGTTGTCAGCCCTTCGCTGTTCGGTGTGTTCAGAGGGATGTATTGAAGGAGGATAGCGCAACTAGGACGGACAA
Ankfn1	ENSMUST00000169201	CGCGGTGGTGGTACGACATGAAGGAGGAGGGTAATGATAGAGAGCACTTTGATCTGATCCACAGAGCTACAAGGGATGTATTGAAGGAGGATAGCGCAACTAGGACGGACAA
Ankfn1	ENSMUST00000169201	CGCGGTGGTGGTACGACATGAGGGATGTATTGAAGGAGGATGCAGCAAGCATCTTTTGCCGAGTTTGCAGCAAGTTGAGGTGGGAGAGTATTAGCGCAACTAGGACGGACAA
Ankfn1	ENSMUST00000169201	CGCGGTGGTGGTACGACATGAAGGAGGAGGGTAATGATAGACCCGGCAGCTGTAATGCTGATGAAGGGCTCAAGAGTGAGTAGTAGTGGAGTAGCGCAACTAGGACGGACAA
Ankfn1	ENSMUST00000169201	CGCGGTGGTGGTACGACATGAAGTTGAGGTGGGAGAGTATTATCTGATCCACAGAGCTACACAGCTTTAGGAAGAGTGAGTAGTAGTGGAGTAGCGCAACTAGGACGGACAA
Ankfn1	ENSMUST00000169201	CGCGGTGGTGGTACGACATGAAGTTGAGGTGGGAGAGTATTTTTTCATGCGCCGGTAGAGCCGGTACCTCCAAGGAGGAGGGTAATGATAGAAGCGCAACTAGGACGGACAA
Ankfn1	ENSMUST00000169201	CGCGGTGGTGGTACGACATGAAGAGTGAGTAGTAGTGGAGTAGACGTCGTCTGAGGCAGGGAGCAAGAGAAAGGGATGTATTGAAGGAGGATAGCGCAACTAGGACGGACAA
Ankfn1	ENSMUST00000169201	CGCGGTGGTGGTACGACATGAAGGAGGAGGGTAATGATAGAAGACGATGGAGCACTGTGTTTTTTTGACTGAGGGATGTATTGAAGGAGGATAGCGCAACTAGGACGGACAA
Ankfn1	ENSMUST00000169201	CGCGGTGGTGGTACGACATGAGGGATGTATTGAAGGAGGATCTGACCGTTAGGGACGTGCTGCTGCTTACCAAGTTGAGGTGGGAGAGTATTAGCGCAACTAGGACGGACAA
Ankfn1	ENSMUST00000169201	CGCGGTGGTGGTACGACATGAAGGAGGAGGGTAATGATAGAACCCTGTCCTGGGCCTCCTGAACTAGAGTGAAGAGTGAGTAGTAGTGGAGTAGCGCAACTAGGACGGACAA
Ankfn1	ENSMUST00000169201	CGCGGTGGTGGTACGACATGAAGTTGAGGTGGGAGAGTATTCAGCATTGGGAGACGATGGAGCACTGTGTTAAGAGTGAGTAGTAGTGGAGTAGCGCAACTAGGACGGACAA
Ankfn1	ENSMUST00000169201	CGCGGTGGTGGTACGACATGAAGTTGAGGTGGGAGAGTATTACTTGAACAAAATACTGTTGGCCCGTGGTGAAGGAGGAGGGTAATGATAGAAGCGCAACTAGGACGGACAA
Ankfn1	ENSMUST00000169201	CGCGGTGGTGGTACGACATGAAGAGTGAGTAGTAGTGGAGTCTTTAGACATGCTCCATTCCACTTTGTACCAGGGATGTATTGAAGGAGGATAGCGCAACTAGGACGGACAA
Ankfn1	ENSMUST00000169201	CGCGGTGGTGGTACGACATGAGGGATGTATTGAAGGAGGATGGGCCTCCTGAACTAGAGTGTTGAGATGCAAAGGAGGAGGGTAATGATAGAAGCGCAACTAGGACGGACAA
Ankfn1	ENSMUST00000169201	CGCGGTGGTGGTACGACATGAAGTTGAGGTGGGAGAGTATTACGTTGTTGGTCATGATGGCGATGTCCAGGAGGGATGTATTGAAGGAGGATAGCGCAACTAGGACGGACAA
Ankfn1	ENSMUST00000169201	CGCGGTGGTGGTACGACATGAAGAGTGAGTAGTAGTGGAGTCAGGCTGACAAAGTGCGGACTTTCTCTGGCAAGGAGGAGGGTAATGATAGAAGCGCAACTAGGACGGACAA
Ankfn1	ENSMUST00000169201	CGCGGTGGTGGTACGACATGAAGAGTGAGTAGTAGTGGAGTTCTTCACGTGGCAGAGAATGTTGGGTAGCTAAGTTGAGGTGGGAGAGTATTAGCGCAACTAGGACGGACAA
Ankfn1	ENSMUST00000169201	CGCGGTGGTGGTACGACATGAAGGAGGAGGGTAATGATAGAGTTCCAAGTAAATTCTGTAGCTGAGCTGTGAAGTTGAGGTGGGAGAGTATTAGCGCAACTAGGACGGACAA
Ankfn1	ENSMUST00000169201	CGCGGTGGTGGTACGACATGAGGGATGTATTGAAGGAGGATTCTCCGAGAGGTTCCTGTACAGTCGCTTGGAAGAGTGAGTAGTAGTGGAGTAGCGCAACTAGGACGGACAA
Ankfn1	ENSMUST00000169201	CGCGGTGGTGGTACGACATGAGGGATGTATTGAAGGAGGATTGCGGCCTGTGGTTTGCAGTTTTGAGCTTTAAGGAGGAGGGTAATGATAGAAGCGCAACTAGGACGGACAA
Ankfn1	ENSMUST00000169201	CGCGGTGGTGGTACGACATGAAGTTGAGGTGGGAGAGTATTGCAGTTTTGAGATTTGCATCCATTTGCCATAGGGATGTATTGAAGGAGGATAGCGCAACTAGGACGGACAA
Ankfn1	ENSMUST00000169201	CGCGGTGGTGGTACGACATGAAGAGTGAGTAGTAGTGGAGTTTCACAGAAGTCTTTCTGAGACTCAGCCGAAAGGAGGAGGGTAATGATAGAAGCGCAACTAGGACGGACAA
Ankfn1	ENSMUST00000169201	CGCGGTGGTGGTACGACATGAAGTTGAGGTGGGAGAGTATTGATGTAAGTTCTGCATTTGCTGGGTCATTTAAGAGTGAGTAGTAGTGGAGTAGCGCAACTAGGACGGACAA
Ankfn1	ENSMUST00000169201	CGCGGTGGTGGTACGACATGAAGTTGAGGTGGGAGAGTATTTTTTCACGGATCTTCACGTGGCAGAGAATGAAGGAGGAGGGTAATGATAGAAGCGCAACTAGGACGGACAA
Ankfn1	ENSMUST00000169201	CGCGGTGGTGGTACGACATGAGGGATGTATTGAAGGAGGATGCTTCATGAACCACAGAAAGTCTTGTGTAAAAGAGTGAGTAGTAGTGGAGTAGCGCAACTAGGACGGACAA
Ankfn1	ENSMUST00000169201	CGCGGTGGTGGTACGACATGAGGGATGTATTGAAGGAGGATCTCGTTTCAAGGTCTTCACGAACTTGTTTGAAGGAGGAGGGTAATGATAGAAGCGCAACTAGGACGGACAA
Ankfn1	ENSMUST00000169201	CGCGGTGGTGGTACGACATGAGGGATGTATTGAAGGAGGATTGAGGCAGGGAGCAAGAGAAGAAAGGACACAAGTTGAGGTGGGAGAGTATTAGCGCAACTAGGACGGACAA
Ankfn1	ENSMUST00000169201	CGCGGTGGTGGTACGACATGAAGAGTGAGTAGTAGTGGAGTCTTGTGTCTGGGCTCTCTGTCGTCATAGTCAAGGAGGAGGGTAATGATAGAAGCGCAACTAGGACGGACAA
Ankfn1	ENSMUST00000169201	CGCGGTGGTGGTACGACATGAAGAGTGAGTAGTAGTGGAGTGCAGAGAATGTTGGGTAGCTTTTGGGTTACAAGTTGAGGTGGGAGAGTATTAGCGCAACTAGGACGGACAA
Ankfn1	ENSMUST00000169201	CGCGGTGGTGGTACGACATGAAGTTGAGGTGGGAGAGTATTGCCTCAAACATGGCTTCGTTGCCCTGGAAGAAGGAGGAGGGTAATGATAGAAGCGCAACTAGGACGGACAA
Ankfn1	ENSMUST00000169201	CGCGGTGGTGGTACGACATGAGGGATGTATTGAAGGAGGATAGGCAGCAGAGGAACAAGTTGCTGGTAAGTAAGAGTGAGTAGTAGTGGAGTAGCGCAACTAGGACGGACAA
Ankfn1	ENSMUST00000169201	CGCGGTGGTGGTACGACATGAAGGAGGAGGGTAATGATAGAGTCTTCCCACATACAAGACAGCTTCATGAAAGGGATGTATTGAAGGAGGATAGCGCAACTAGGACGGACAA
Ankfn1	ENSMUST00000169201	CGCGGTGGTGGTACGACATGAGGGATGTATTGAAGGAGGATTGTGCAGACAGCTCACTCACCCTGTCCTGGAAGTTGAGGTGGGAGAGTATTAGCGCAACTAGGACGGACAA
Ankfn1	ENSMUST00000169201	CGCGGTGGTGGTACGACATGAAGAGTGAGTAGTAGTGGAGTATTTCCAACACCTCCTGTGTGTAGAGGCGGAAGGAGGAGGGTAATGATAGAAGCGCAACTAGGACGGACAA
Ankfn1	ENSMUST00000169201	CGCGGTGGTGGTACGACATGAAGTTGAGGTGGGAGAGTATTAGGTTATCCATGATGATCTCCCCAGCCAACAAGAGTGAGTAGTAGTGGAGTAGCGCAACTAGGACGGACAA
Ankfn1	ENSMUST00000169201	CGCGGTGGTGGTACGACATGAAGTTGAGGTGGGAGAGTATTTACAGTCCAGGTGAGAGCCGCTGATGGCTCAAGGAGGAGGGTAATGATAGAAGCGCAACTAGGACGGACAA
Ankfn1	ENSMUST00000169201	CGCGGTGGTGGTACGACATGAGGGATGTATTGAAGGAGGATCCCTTCAGCTTCTCCGAGAGGTTCCTGTACAAGAGTGAGTAGTAGTGGAGTAGCGCAACTAGGACGGACAA
Ankfn1	ENSMUST00000169201	CGCGGTGGTGGTACGACATGAAGGAGGAGGGTAATGATAGATTTGAGCTTTCCCGGCAGCTGTAATGCTGAAGGGATGTATTGAAGGAGGATAGCGCAACTAGGACGGACAA
Ankfn1	ENSMUST00000169201	CGCGGTGGTGGTACGACATGAGGGATGTATTGAAGGAGGATTCTCTGATGGTAACTATGAGAATGTTGCCAAAGTTGAGGTGGGAGAGTATTAGCGCAACTAGGACGGACAA
Ankfn1	ENSMUST00000169201	CGCGGTGGTGGTACGACATGAAGGAGGAGGGTAATGATAGACTCTTGAAAGCTGACCGTTAGGGACGTGCTAAGAGTGAGTAGTAGTGGAGTAGCGCAACTAGGACGGACAA
Ankfn1	ENSMUST00000169201	CGCGGTGGTGGTACGACATGAAGTTGAGGTGGGAGAGTATTGGCTCTCTGTCGTCATAGTCTTTCCAGTTGAAGAGTGAGTAGTAGTGGAGTAGCGCAACTAGGACGGACAA
Ankfn1	ENSMUST00000169201	CGCGGTGGTGGTACGACATGAAGGAGGAGGGTAATGATAGAGAGCCGCTGATGGCTCCTCTTGTGGTAGGAAAGTTGAGGTGGGAGAGTATTAGCGCAACTAGGACGGACAA
Ankfn1	ENSMUST00000169201	CGCGGTGGTGGTACGACATGAAGAGTGAGTAGTAGTGGAGTCTTTTGGATCCACTCCCACTCCTCTTTGGAAGGGATGTATTGAAGGAGGATAGCGCAACTAGGACGGACAA
Ankfn1	ENSMUST00000169201	CGCGGTGGTGGTACGACATGAGGGATGTATTGAAGGAGGATTTGGGTAGCTTTTGGGTTACGAGCACTTTGAAGGAGGAGGGTAATGATAGAAGCGCAACTAGGACGGACAA
Ankfn1	ENSMUST00000169201	CGCGGTGGTGGTACGACATGAAGTTGAGGTGGGAGAGTATTATGAGACAGGCATTGGCTGGCACCTCTGGGAGGGATGTATTGAAGGAGGATAGCGCAACTAGGACGGACAA
Ankfn1	ENSMUST00000169201	CGCGGTGGTGGTACGACATGAAGGAGGAGGGTAATGATAGATAGAAGAACAATTGCATGGGGCAGTCAGCAAAGAGTGAGTAGTAGTGGAGTAGCGCAACTAGGACGGACAA
Ankfn1	ENSMUST00000169201	CGCGGTGGTGGTACGACATGAAGAGTGAGTAGTAGTGGAGTCCCAAGTTGTGTGTTCCAAGTAAATTCTGTAAGTTGAGGTGGGAGAGTATTAGCGCAACTAGGACGGACAA
Ankfn1	ENSMUST00000169201	CGCGGTGGTGGTACGACATGAAGGAGGAGGGTAATGATAGACGAGTGACTGCCCTTCAGCTTCTCCGAGAGAAGTTGAGGTGGGAGAGTATTAGCGCAACTAGGACGGACAA
Ankfn1	ENSMUST00000169201	CGCGGTGGTGGTACGACATGAGGGATGTATTGAAGGAGGATGCCCGTGGTGAGTCCTGTGATTGTACACCTAAGAGTGAGTAGTAGTGGAGTAGCGCAACTAGGACGGACAA
Ankfn1	ENSMUST00000169201	CGCGGTGGTGGTACGACATGAGGGATGTATTGAAGGAGGATGAGGTTAAGAAACCCTGAGTGCGGGGTGTAAAGGAGGAGGGTAATGATAGAAGCGCAACTAGGACGGACAA
Ankfn1	ENSMUST00000169201	CGCGGTGGTGGTACGACATGAAGTTGAGGTGGGAGAGTATTCAGAGCTACACAGCTTTAGGTAACCTAGATAGGGATGTATTGAAGGAGGATAGCGCAACTAGGACGGACAA
Ankfn1	ENSMUST00000169201	CGCGGTGGTGGTACGACATGAAGGAGGAGGGTAATGATAGATGGGTCATTTTCGAGCAGTAGTTCCAGCTTAAGAGTGAGTAGTAGTGGAGTAGCGCAACTAGGACGGACAA
Ankfn1	ENSMUST00000169201	CGCGGTGGTGGTACGACATGAAGAGTGAGTAGTAGTGGAGTCAGAGACTTCCTCTGGCTTTGCAGTTTTGAAAGTTGAGGTGGGAGAGTATTAGCGCAACTAGGACGGACAA
Ankfn1	ENSMUST00000169201	CGCGGTGGTGGTACGACATGAAGTTGAGGTGGGAGAGTATTTGGTCACTACGGCTGCGTTGACACTGAGGGAAGGAGGAGGGTAATGATAGAAGCGCAACTAGGACGGACAA
Ankfn1	ENSMUST00000169201	CGCGGTGGTGGTACGACATGAAGAGTGAGTAGTAGTGGAGTGCTGCGTTGACACTGAGGGGCTCTTGAAAGAGGGATGTATTGAAGGAGGATAGCGCAACTAGGACGGACAA
Ankfn1	ENSMUST00000169201	CGCGGTGGTGGTACGACATGAAGGAGGAGGGTAATGATAGATGTGGTAGGACAGAATATCCTGGATGGTTAAGGGATGTATTGAAGGAGGATAGCGCAACTAGGACGGACAA
Ankfn1	ENSMUST00000169201	CGCGGTGGTGGTACGACATGAAGTTGAGGTGGGAGAGTATTACTTTGTACCTGGTCACTACGGCTGCGTTGAGGGATGTATTGAAGGAGGATAGCGCAACTAGGACGGACAA
Ankfn1	ENSMUST00000169201	CGCGGTGGTGGTACGACATGAAGGAGGAGGGTAATGATAGACCACTGCCATCTGGAGCTCGTAGAAGAACAAAGAGTGAGTAGTAGTGGAGTAGCGCAACTAGGACGGACAA
Ankfn1	ENSMUST00000169201	CGCGGTGGTGGTACGACATGAAGAGTGAGTAGTAGTGGAGTTTGCTCAACTGCCTCAAACATGGCTTCGTTAAGTTGAGGTGGGAGAGTATTAGCGCAACTAGGACGGACAA
Ankfn1	ENSMUST00000169201	CGCGGTGGTGGTACGACATGAAGGAGGAGGGTAATGATAGAAACCCTGAGTGCGGGGTGTAAGGATTATTCAAGTTGAGGTGGGAGAGTATTAGCGCAACTAGGACGGACAA
Ankfn1	ENSMUST00000169201	CGCGGTGGTGGTACGACATGAGGGATGTATTGAAGGAGGATAACTATGAGAATGTTGCCATGGCGATCTTTAAGAGTGAGTAGTAGTGGAGTAGCGCAACTAGGACGGACAA
Ankfn1	ENSMUST00000169201	CGCGGTGGTGGTACGACATGAAGGAGGAGGGTAATGATAGAGCTGCTTCTCTTTCTCTGTGTTGTCCAGGGAGGGATGTATTGAAGGAGGATAGCGCAACTAGGACGGACAA
Ankfn1	ENSMUST00000169201	CGCGGTGGTGGTACGACATGAAGTTGAGGTGGGAGAGTATTGTAGAGGCGGAAGTTCCTTGCCTGGTGTCGAGGGATGTATTGAAGGAGGATAGCGCAACTAGGACGGACAA
Ankfn1	ENSMUST00000169201	CGCGGTGGTGGTACGACATGAAGAGTGAGTAGTAGTGGAGTGGGGAAAAGTCTTTAGACATGCTCCATTCCAAGGAGGAGGGTAATGATAGAAGCGCAACTAGGACGGACAA
Ankfn1	ENSMUST00000169201	CGCGGTGGTGGTACGACATGAAGTTGAGGTGGGAGAGTATTTATATTGGTAGAGGAGGAGTTGCACAGCATAAGAGTGAGTAGTAGTGGAGTAGCGCAACTAGGACGGACAA
Ankfn1	ENSMUST00000169201	CGCGGTGGTGGTACGACATGAAGGAGGAGGGTAATGATAGATCGAGCAGTAGTTCCAGCTTAAGCTCTTCGAAGTTGAGGTGGGAGAGTATTAGCGCAACTAGGACGGACAA
Ankfn1	ENSMUST00000169201	CGCGGTGGTGGTACGACATGAGGGATGTATTGAAGGAGGATTCTTTCTGAGACTCAGCCGATCCGTTCTTGAAGAGTGAGTAGTAGTGGAGTAGCGCAACTAGGACGGACAA
Ankfn1	ENSMUST00000169201	CGCGGTGGTGGTACGACATGAGGGATGTATTGAAGGAGGATGGAACAAGTTGCTGGTAAGTGTCCAGTGCTAAGGAGGAGGGTAATGATAGAAGCGCAACTAGGACGGACAA
Ankfn1	ENSMUST00000169201	CGCGGTGGTGGTACGACATGAGGGATGTATTGAAGGAGGATAAATCACATTGGCTCTGCTTTCTCCTGTAGAAGTTGAGGTGGGAGAGTATTAGCGCAACTAGGACGGACAA
Ankfn1	ENSMUST00000169201	CGCGGTGGTGGTACGACATGAAGGAGGAGGGTAATGATAGAATACAAGACAGCTTCATGAACCACAGAAAGAAGAGTGAGTAGTAGTGGAGTAGCGCAACTAGGACGGACAA
Ankfn1	ENSMUST00000169201	CGCGGTGGTGGTACGACATGAAGTTGAGGTGGGAGAGTATTCACACTTTCCATAGACTCAGAGCCAGAAAGAAGAGTGAGTAGTAGTGGAGTAGCGCAACTAGGACGGACAA
Ankfn1	ENSMUST00000169201	CGCGGTGGTGGTACGACATGAAGGAGGAGGGTAATGATAGAGTAATGCTGATGAAGGGCTCGGACTTGCTGAAGTTGAGGTGGGAGAGTATTAGCGCAACTAGGACGGACAA
Ankfn1	ENSMUST00000169201	CGCGGTGGTGGTACGACATGAAGAGTGAGTAGTAGTGGAGTTGGCTCCTCTTGTGGTAGGACAGAATATCCAGGGATGTATTGAAGGAGGATAGCGCAACTAGGACGGACAA
Ankfn1	ENSMUST00000169201	CGCGGTGGTGGTACGACATGAAGGAGGAGGGTAATGATAGAGGCGATCTTTAATGGGCTCATAGTAAAGTCAGGGATGTATTGAAGGAGGATAGCGCAACTAGGACGGACAA
Ankfn1	ENSMUST00000169201	CGCGGTGGTGGTACGACATGAGGGATGTATTGAAGGAGGATCCTCCTGTGTGTAGAGGCGGAAGTTCCTTGAAGTTGAGGTGGGAGAGTATTAGCGCAACTAGGACGGACAA
Ankfn1	ENSMUST00000169201	CGCGGTGGTGGTACGACATGAAGGAGGAGGGTAATGATAGAATTGCATGGGGCAGTCAGCATTATGATCCAAAGAGTGAGTAGTAGTGGAGTAGCGCAACTAGGACGGACAA
Ankfn1	ENSMUST00000169201	CGCGGTGGTGGTACGACATGAAGTTGAGGTGGGAGAGTATTTTGAGATGCATTGCTCGGCTCTCCAGGCTGAAGAGTGAGTAGTAGTGGAGTAGCGCAACTAGGACGGACAA
Ankfn1	ENSMUST00000169201	CGCGGTGGTGGTACGACATGAAGTTGAGGTGGGAGAGTATTCCTTTCATGTTGTAAGCTGAGACTTGAACAAAGGAGGAGGGTAATGATAGAAGCGCAACTAGGACGGACAA
Ankfn1	ENSMUST00000169201	CGCGGTGGTGGTACGACATGAAGAGTGAGTAGTAGTGGAGTTGCTTCAGGCTCCTGGACACCGACTGCTTGAGGGATGTATTGAAGGAGGATAGCGCAACTAGGACGGACAA
Ankfn1	ENSMUST00000169201	CGCGGTGGTGGTACGACATGAAGGAGGAGGGTAATGATAGAGCTCCATTCCACTTTGTACCTGGTCACTACAGGGATGTATTGAAGGAGGATAGCGCAACTAGGACGGACAA
Ano4	ENSMUST00000182341	CGCGGTGGTGGTACGACATGAGGAGTAGTTGGTTGTTAGGAAGGGGTTCCTGAGAACTCACTGCCATCAGAATAGAGTTGATAGAGGGAGAAAGCGCAACTAGGACGGACAA
Ano4	ENSMUST00000182341	CGCGGTGGTGGTACGACATGAAGTGTGGGATTGATGAGATATTACTGACTTGGCAGTGATCCAGAGTGGTGATAGAGTTGATAGAGGGAGAAAGCGCAACTAGGACGGACAA
Ano4	ENSMUST00000182341	CGCGGTGGTGGTACGACATGAAGTTGAGGTGGGAGAGTATTGGCCTCCATTTTTATTGACCGTCTGCCTGGATAGAGTTGATAGAGGGAGAAAGCGCAACTAGGACGGACAA
Ano4	ENSMUST00000182341	CGCGGTGGTGGTACGACATGAGGAGTAGTTGGTTGTTAGGAGGACTCTTTCTCCATTTGTAATCCTTCTGCAAGTGTGGGATTGATGAGATAAGCGCAACTAGGACGGACAA
Ano4	ENSMUST00000182341	CGCGGTGGTGGTACGACATGAAGTTGAGGTGGGAGAGTATTAAGGCTGCGGGGAAGAGCATGCCTGTGTACAGGAGTAGTTGGTTGTTAGGAAGCGCAACTAGGACGGACAA
Ano4	ENSMUST00000182341	CGCGGTGGTGGTACGACATGAAGTGTGGGATTGATGAGATATAGCAATTGTGTGCTGGACTGCAGCGTGATAAGTTGAGGTGGGAGAGTATTAGCGCAACTAGGACGGACAA
Ano4	ENSMUST00000182341	CGCGGTGGTGGTACGACATGAGGAGTAGTTGGTTGTTAGGAAGAGTCCATAGGCATTCATCGGCTGAAGATATAGAGTTGATAGAGGGAGAAAGCGCAACTAGGACGGACAA
Ano4	ENSMUST00000182341	CGCGGTGGTGGTACGACATGAAGTGTGGGATTGATGAGATATGTAGTCCTTTTCCCACTGTGGGAAATTTAATAGAGTTGATAGAGGGAGAAAGCGCAACTAGGACGGACAA
Ano4	ENSMUST00000182341	CGCGGTGGTGGTACGACATGAAGTTGAGGTGGGAGAGTATTGTCACCTTGGCATAGACACAGCTGTCTGAAATAGAGTTGATAGAGGGAGAAAGCGCAACTAGGACGGACAA
Ano4	ENSMUST00000182341	CGCGGTGGTGGTACGACATGAAGTGTGGGATTGATGAGATATCAGACCGATTTTATTCTTTCCTTCCTCGTAGGAGTAGTTGGTTGTTAGGAAGCGCAACTAGGACGGACAA
Ano4	ENSMUST00000182341	CGCGGTGGTGGTACGACATGAAGTTGAGGTGGGAGAGTATTATCTTTCGGGAGGTCTGGTATCAGATAGGAAGGAGTAGTTGGTTGTTAGGAAGCGCAACTAGGACGGACAA
Ano4	ENSMUST00000182341	CGCGGTGGTGGTACGACATGAAGTGTGGGATTGATGAGATACGCTTTTCAGCCCCATGAATAGATAAACTTAAGTTGAGGTGGGAGAGTATTAGCGCAACTAGGACGGACAA
Ano4	ENSMUST00000182341	CGCGGTGGTGGTACGACATGAGGAGTAGTTGGTTGTTAGGATGTAACTTCCCTCATGCAGGGGAAAGGCAGATAGAGTTGATAGAGGGAGAAAGCGCAACTAGGACGGACAA
Ano4	ENSMUST00000182341	CGCGGTGGTGGTACGACATGATAGAGTTGATAGAGGGAGAAACCACGCAGATCATGAAGAATATTCCTGATAAGTGTGGGATTGATGAGATAAGCGCAACTAGGACGGACAA
Ano4	ENSMUST00000182341	CGCGGTGGTGGTACGACATGATAGAGTTGATAGAGGGAGAAAGGCTGTTCCAGATTTGTTAGAAGGAGTGCAAGTTGAGGTGGGAGAGTATTAGCGCAACTAGGACGGACAA
Ano4	ENSMUST00000182341	CGCGGTGGTGGTACGACATGAGGAGTAGTTGGTTGTTAGGAATGATGATATCTGTTGCTTGGCAGACTTCTAAGTGTGGGATTGATGAGATAAGCGCAACTAGGACGGACAA
Ano4	ENSMUST00000182341	CGCGGTGGTGGTACGACATGAGGAGTAGTTGGTTGTTAGGAGTTGACAGCCTCAAGTTCGTCAAAAAGAATAAGTTGAGGTGGGAGAGTATTAGCGCAACTAGGACGGACAA
Ano4	ENSMUST00000182341	CGCGGTGGTGGTACGACATGAAGTGTGGGATTGATGAGATAGCCATAGGGTGCCAAAGAGTGAGGAGGGTCAAGTTGAGGTGGGAGAGTATTAGCGCAACTAGGACGGACAA
Ano4	ENSMUST00000182341	CGCGGTGGTGGTACGACATGATAGAGTTGATAGAGGGAGAAAGAAATACATCTATGGCCATCCACATAGCTAGGAGTAGTTGGTTGTTAGGAAGCGCAACTAGGACGGACAA
Ano4	ENSMUST00000182341	CGCGGTGGTGGTACGACATGATAGAGTTGATAGAGGGAGAAAAGGAGAAAGGATCCTTCCTCGGTGTCTGTAAGTGTGGGATTGATGAGATAAGCGCAACTAGGACGGACAA
Ano4	ENSMUST00000182341	CGCGGTGGTGGTACGACATGATAGAGTTGATAGAGGGAGAAGTACTTCTCTCTCCTCATCCGGTCCCTTAGAAGTTGAGGTGGGAGAGTATTAGCGCAACTAGGACGGACAA
Ano4	ENSMUST00000182341	CGCGGTGGTGGTACGACATGAAGTGTGGGATTGATGAGATACGGCGTCTCTTCCAGAATTCCAGGAAAACAAGGAGTAGTTGGTTGTTAGGAAGCGCAACTAGGACGGACAA
Ano4	ENSMUST00000182341	CGCGGTGGTGGTACGACATGAGGAGTAGTTGGTTGTTAGGACTTGTACCGGCGGGGCAGGTAATAGATTTTAAGTTGAGGTGGGAGAGTATTAGCGCAACTAGGACGGACAA
Ano4	ENSMUST00000182341	CGCGGTGGTGGTACGACATGAAGTTGAGGTGGGAGAGTATTCGGACTTTTCTTCTAGTCCACCAATTTTGAAAGTGTGGGATTGATGAGATAAGCGCAACTAGGACGGACAA
Ano4	ENSMUST00000182341	CGCGGTGGTGGTACGACATGAGGAGTAGTTGGTTGTTAGGACATTGGCTTCTTAGGTAACCATCTCCGGAAATAGAGTTGATAGAGGGAGAAAGCGCAACTAGGACGGACAA
Ano4	ENSMUST00000182341	CGCGGTGGTGGTACGACATGATAGAGTTGATAGAGGGAGAAGTCCACCTTCTGCGTGGAAAACTTTATTTTAAGTTGAGGTGGGAGAGTATTAGCGCAACTAGGACGGACAA
Ano4	ENSMUST00000182341	CGCGGTGGTGGTACGACATGAAGTGTGGGATTGATGAGATATTAAGCCCAGTGTCTGTAAAATTCACATGGAGGAGTAGTTGGTTGTTAGGAAGCGCAACTAGGACGGACAA
Ano4	ENSMUST00000182341	CGCGGTGGTGGTACGACATGAGGAGTAGTTGGTTGTTAGGAGTGGAGCTGTTCAGATTGACAAACTGAAAAAAGTTGAGGTGGGAGAGTATTAGCGCAACTAGGACGGACAA
Ano4	ENSMUST00000182341	CGCGGTGGTGGTACGACATGAAGTTGAGGTGGGAGAGTATTCTCAGCCTCATACATCATCTCCTGGATCAAAAGTGTGGGATTGATGAGATAAGCGCAACTAGGACGGACAA
Ano4	ENSMUST00000182341	CGCGGTGGTGGTACGACATGAGGAGTAGTTGGTTGTTAGGACCGGTAGTCTCGATATCTGCAGTACTTCAGATAGAGTTGATAGAGGGAGAAAGCGCAACTAGGACGGACAA
Ano4	ENSMUST00000182341	CGCGGTGGTGGTACGACATGAAGTGTGGGATTGATGAGATAGCAGAAACGATAAGTCTGCTGCATTTATCAATAGAGTTGATAGAGGGAGAAAGCGCAACTAGGACGGACAA
Ano4	ENSMUST00000182341	CGCGGTGGTGGTACGACATGAAGTTGAGGTGGGAGAGTATTGGCCTGCACAAGGTCCATATTTATAAGCATATAGAGTTGATAGAGGGAGAAAGCGCAACTAGGACGGACAA
Ano4	ENSMUST00000182341	CGCGGTGGTGGTACGACATGAAGTGTGGGATTGATGAGATAGGCCCAGCACTCATACAGTAGATGTCGGTGAGGAGTAGTTGGTTGTTAGGAAGCGCAACTAGGACGGACAA
Ano4	ENSMUST00000182341	CGCGGTGGTGGTACGACATGAAGTTGAGGTGGGAGAGTATTGTAGCCCAGACTGCCATGAACACAGCAAAGAGGAGTAGTTGGTTGTTAGGAAGCGCAACTAGGACGGACAA
Ano4	ENSMUST00000182341	CGCGGTGGTGGTACGACATGAAGTGTGGGATTGATGAGATATATGATGAAGTGATGGATCCTTTGTTGGCTAAGTTGAGGTGGGAGAGTATTAGCGCAACTAGGACGGACAA
Ano4	ENSMUST00000182341	CGCGGTGGTGGTACGACATGATAGAGTTGATAGAGGGAGAAGGCATTGTTGAAGAAAGTGTCTTTGTTGTGAGGAGTAGTTGGTTGTTAGGAAGCGCAACTAGGACGGACAA
Ano4	ENSMUST00000182341	CGCGGTGGTGGTACGACATGAAGTGTGGGATTGATGAGATAGTCCATTGGATTTGTTTCGTTCTCGCACTGATAGAGTTGATAGAGGGAGAAAGCGCAACTAGGACGGACAA
Ano4	ENSMUST00000182341	CGCGGTGGTGGTACGACATGAAGTTGAGGTGGGAGAGTATTAGCCTCATGAATGGACAGTATTTGTCACATATAGAGTTGATAGAGGGAGAAAGCGCAACTAGGACGGACAA
Ano4	ENSMUST00000182341	CGCGGTGGTGGTACGACATGAGGAGTAGTTGGTTGTTAGGAAAATCAACTGTCACCTTGTCATGGCCACTCAAGTGTGGGATTGATGAGATAAGCGCAACTAGGACGGACAA
Ano4	ENSMUST00000182341	CGCGGTGGTGGTACGACATGAGGAGTAGTTGGTTGTTAGGAGAGGGTTGGATTTTCTGTACACAAGAATGTAAGTTGAGGTGGGAGAGTATTAGCGCAACTAGGACGGACAA
Ano4	ENSMUST00000182341	CGCGGTGGTGGTACGACATGAAGTTGAGGTGGGAGAGTATTGACATCCTTGGCCATTTCTTGTATTGCATTAAGTGTGGGATTGATGAGATAAGCGCAACTAGGACGGACAA
Ano4	ENSMUST00000182341	CGCGGTGGTGGTACGACATGAGGAGTAGTTGGTTGTTAGGAACGGGTAGCCAAGTTCCATGAAATTATTCCATAGAGTTGATAGAGGGAGAAAGCGCAACTAGGACGGACAA
Ano4	ENSMUST00000182341	CGCGGTGGTGGTACGACATGAAGTGTGGGATTGATGAGATACACTGCCAGAAGTAAACAAAATTCAGGTCTATAGAGTTGATAGAGGGAGAAAGCGCAACTAGGACGGACAA
Ano4	ENSMUST00000182341	CGCGGTGGTGGTACGACATGATAGAGTTGATAGAGGGAGAACCGCTCTTTCTTGGAATACTTGGCTTCAAAAAGTTGAGGTGGGAGAGTATTAGCGCAACTAGGACGGACAA
Ano4	ENSMUST00000182341	CGCGGTGGTGGTACGACATGAAGTGTGGGATTGATGAGATAAGGTTCTGGCTTTCCTGAAATGGGATTCATAGGAGTAGTTGGTTGTTAGGAAGCGCAACTAGGACGGACAA
Ano4	ENSMUST00000182341	CGCGGTGGTGGTACGACATGAAGTTGAGGTGGGAGAGTATTCAACCATGCACTTTTGCCCAGCTTCTCCTTAGGAGTAGTTGGTTGTTAGGAAGCGCAACTAGGACGGACAA
Ano4	ENSMUST00000182341	CGCGGTGGTGGTACGACATGAAGTGTGGGATTGATGAGATACATCGCTCTTTGGGCCGTCGGGCAGTATTTAAGTTGAGGTGGGAGAGTATTAGCGCAACTAGGACGGACAA
Ano4	ENSMUST00000182341	CGCGGTGGTGGTACGACATGATAGAGTTGATAGAGGGAGAATCTCCTGAAAGGCATCCGTACATTCATTTGAGGAGTAGTTGGTTGTTAGGAAGCGCAACTAGGACGGACAA
Ano4	ENSMUST00000182341	CGCGGTGGTGGTACGACATGATAGAGTTGATAGAGGGAGAACTCTCCAAAATATCGCCTGACAAGATCCAAAAGTGTGGGATTGATGAGATAAGCGCAACTAGGACGGACAA
Ano4	ENSMUST00000182341	CGCGGTGGTGGTACGACATGATAGAGTTGATAGAGGGAGAAGCCACACTTCGCCGTTGATGGATTTGCAAGAAGTTGAGGTGGGAGAGTATTAGCGCAACTAGGACGGACAA
Ano4	ENSMUST00000182341	CGCGGTGGTGGTACGACATGAAGTGTGGGATTGATGAGATAGGCTTCATGTTGGTGACTCTTTAAATGTGAAGGAGTAGTTGGTTGTTAGGAAGCGCAACTAGGACGGACAA
Ano4	ENSMUST00000182341	CGCGGTGGTGGTACGACATGAGGAGTAGTTGGTTGTTAGGACTCCTTCCGTTCTTTCTGGAGGCGCTCCAGAAGTTGAGGTGGGAGAGTATTAGCGCAACTAGGACGGACAA
Ano4	ENSMUST00000182341	CGCGGTGGTGGTACGACATGAAGTTGAGGTGGGAGAGTATTGAATCCCAATGCCTTCGAGAATTCCATACCAAGTGTGGGATTGATGAGATAAGCGCAACTAGGACGGACAA
Ano4	ENSMUST00000182341	CGCGGTGGTGGTACGACATGAGGAGTAGTTGGTTGTTAGGACCCAGTATACAAGTCTCCCCTTGGTTTTAAATAGAGTTGATAGAGGGAGAAAGCGCAACTAGGACGGACAA
Ano4	ENSMUST00000182341	CGCGGTGGTGGTACGACATGATAGAGTTGATAGAGGGAGAAACACAAGTCCTTTCAGCCTCCCCTCCAGCCAAGTGTGGGATTGATGAGATAAGCGCAACTAGGACGGACAA
Ano4	ENSMUST00000182341	CGCGGTGGTGGTACGACATGAAGTTGAGGTGGGAGAGTATTAAATTCCTATGTCTTTGGCTCTCGAAGCCAATAGAGTTGATAGAGGGAGAAAGCGCAACTAGGACGGACAA
Ano4	ENSMUST00000182341	CGCGGTGGTGGTACGACATGAGGAGTAGTTGGTTGTTAGGACCTGAGAGTTATTCCTGATTAATGCCCACTAAGTGTGGGATTGATGAGATAAGCGCAACTAGGACGGACAA
Ano4	ENSMUST00000182341	CGCGGTGGTGGTACGACATGAAGTTGAGGTGGGAGAGTATTGAAAGGGGCAGTGTAGCAGTCATTCTCTTCAGGAGTAGTTGGTTGTTAGGAAGCGCAACTAGGACGGACAA
Ano4	ENSMUST00000182341	CGCGGTGGTGGTACGACATGAAGTTGAGGTGGGAGAGTATTTTGCTCGGTCAAGAATGGTCTATGGATAGAAAGTGTGGGATTGATGAGATAAGCGCAACTAGGACGGACAA
Ano4	ENSMUST00000182341	CGCGGTGGTGGTACGACATGATAGAGTTGATAGAGGGAGAACTTCATAGGAGCCATTGGTAAGCAAGCGGTAGGAGTAGTTGGTTGTTAGGAAGCGCAACTAGGACGGACAA
Ano4	ENSMUST00000182341	CGCGGTGGTGGTACGACATGATAGAGTTGATAGAGGGAGAATCAGTAAGGCCAGAAGCGGTGCTAGAGGAAAAGTGTGGGATTGATGAGATAAGCGCAACTAGGACGGACAA
Ano4	ENSMUST00000182341	CGCGGTGGTGGTACGACATGATAGAGTTGATAGAGGGAGAAGCAGCGAAAGTGCTCACAGTCACCACCCTGAAGTTGAGGTGGGAGAGTATTAGCGCAACTAGGACGGACAA
Ano4	ENSMUST00000182341	CGCGGTGGTGGTACGACATGAGGAGTAGTTGGTTGTTAGGAAAAGTGATGGGAGGCAGCAAAGCTCTCCACAAGTGTGGGATTGATGAGATAAGCGCAACTAGGACGGACAA
Ano4	ENSMUST00000182341	CGCGGTGGTGGTACGACATGAGGAGTAGTTGGTTGTTAGGATCTCTCCCCCTGCTTCTAGCCTGCTGGTGTAAGTTGAGGTGGGAGAGTATTAGCGCAACTAGGACGGACAA
Ano4	ENSMUST00000182341	CGCGGTGGTGGTACGACATGAAGTGTGGGATTGATGAGATAAAGCAGAGAATCATCATCTTTGCAAGGGCTAAGTTGAGGTGGGAGAGTATTAGCGCAACTAGGACGGACAA
Ano4	ENSMUST00000182341	CGCGGTGGTGGTACGACATGAGGAGTAGTTGGTTGTTAGGATGGGAGTGAGGAATGCCTGACCACAGGCAGATAGAGTTGATAGAGGGAGAAAGCGCAACTAGGACGGACAA
Ano4	ENSMUST00000182341	CGCGGTGGTGGTACGACATGAAGTGTGGGATTGATGAGATATAAATGACGATCCCGAACACAGCAGCGATCATAGAGTTGATAGAGGGAGAAAGCGCAACTAGGACGGACAA
Ano4	ENSMUST00000182341	CGCGGTGGTGGTACGACATGATAGAGTTGATAGAGGGAGAAGTGTCATTTGGTGATGTAGAACAGGACATTAAGTTGAGGTGGGAGAGTATTAGCGCAACTAGGACGGACAA
Ano4	ENSMUST00000182341	CGCGGTGGTGGTACGACATGAAGTGTGGGATTGATGAGATAGTTTACAGCTCCATGGGTTTTAATGGAGTTAGGAGTAGTTGGTTGTTAGGAAGCGCAACTAGGACGGACAA
Ano4	ENSMUST00000182341	CGCGGTGGTGGTACGACATGAAGTTGAGGTGGGAGAGTATTAAGCTGCCACAAAGATCGTTGTGAATCCGAAGGAGTAGTTGGTTGTTAGGAAGCGCAACTAGGACGGACAA
Ano4	ENSMUST00000182341	CGCGGTGGTGGTACGACATGAAGTTGAGGTGGGAGAGTATTAAGGCCTTCTCCACTGAGTAACAAACTTATAAGTGTGGGATTGATGAGATAAGCGCAACTAGGACGGACAA
Ano4	ENSMUST00000182341	CGCGGTGGTGGTACGACATGAGGAGTAGTTGGTTGTTAGGAGGGATGAAGTCGGATGTTATTGCTATGACAATAGAGTTGATAGAGGGAGAAAGCGCAACTAGGACGGACAA
Ano4	ENSMUST00000182341	CGCGGTGGTGGTACGACATGATAGAGTTGATAGAGGGAGAAATTGTGATGTGCTTTTCCGTTCTTCTTCCTAAGTGTGGGATTGATGAGATAAGCGCAACTAGGACGGACAA
Ano4	ENSMUST00000182341	CGCGGTGGTGGTACGACATGAAGTTGAGGTGGGAGAGTATTAGGCTGGTACTTGTACCACACGCCCCAGGAATAGAGTTGATAGAGGGAGAAAGCGCAACTAGGACGGACAA
Ano4	ENSMUST00000182341	CGCGGTGGTGGTACGACATGAAGTGTGGGATTGATGAGATAAAAGCTGTTCTCCCACTCGGATTCTGTGCGAGGAGTAGTTGGTTGTTAGGAAGCGCAACTAGGACGGACAA
Ano4	ENSMUST00000182341	CGCGGTGGTGGTACGACATGAGGAGTAGTTGGTTGTTAGGATTGCATGCAGAGATCAATAAGGCATCCGCTAAGTTGAGGTGGGAGAGTATTAGCGCAACTAGGACGGACAA
Ano4	ENSMUST00000182341	CGCGGTGGTGGTACGACATGAAGTGTGGGATTGATGAGATACTCCGAAGTGCTCGTCAGATTTCCAGGGTGAAGTTGAGGTGGGAGAGTATTAGCGCAACTAGGACGGACAA
Ano4	ENSMUST00000182341	CGCGGTGGTGGTACGACATGATAGAGTTGATAGAGGGAGAAGGAACGTGTCCAAGTGTCCAAATACCCTTTAGGAGTAGTTGGTTGTTAGGAAGCGCAACTAGGACGGACAA
Ano4	ENSMUST00000182341	CGCGGTGGTGGTACGACATGATAGAGTTGATAGAGGGAGAATGCGAGAACATGCCAGAACTGCAGTGTGTAAAGTGTGGGATTGATGAGATAAGCGCAACTAGGACGGACAA
Ano4	ENSMUST00000182341	CGCGGTGGTGGTACGACATGAAGTTGAGGTGGGAGAGTATTAACACAGTGGCCCCATTGTCAAAAAGGTGGATAGAGTTGATAGAGGGAGAAAGCGCAACTAGGACGGACAA
Ano4	ENSMUST00000182341	CGCGGTGGTGGTACGACATGAGGAGTAGTTGGTTGTTAGGACCTGCTTATTTGTTTATCGATCCTGCTCATAAGTGTGGGATTGATGAGATAAGCGCAACTAGGACGGACAA
Ano4	ENSMUST00000182341	CGCGGTGGTGGTACGACATGAGGAGTAGTTGGTTGTTAGGACTCAAACACAATGATAAAAGCCAGCCGAGCAAGTTGAGGTGGGAGAGTATTAGCGCAACTAGGACGGACAA
Ano4	ENSMUST00000182341	CGCGGTGGTGGTACGACATGAAGTGTGGGATTGATGAGATAAGGTCTGCTTTAGCACCATTATAATACCCAAAGTTGAGGTGGGAGAGTATTAGCGCAACTAGGACGGACAA
Ano4	ENSMUST00000182341	CGCGGTGGTGGTACGACATGAGGAGTAGTTGGTTGTTAGGAACTCCATACAAGAAGACAAACAACCCAATGATAGAGTTGATAGAGGGAGAAAGCGCAACTAGGACGGACAA
Ano4	ENSMUST00000182341	CGCGGTGGTGGTACGACATGAAGTGTGGGATTGATGAGATAGATAGAATGCAAAAAAGGTAGCAAACAGGCATAGAGTTGATAGAGGGAGAAAGCGCAACTAGGACGGACAA
Ano4	ENSMUST00000182341	CGCGGTGGTGGTACGACATGAAGTTGAGGTGGGAGAGTATTGGTAGACAGAAATTCACCACGAACCTCGGCATAGAGTTGATAGAGGGAGAAAGCGCAACTAGGACGGACAA
Ano4	ENSMUST00000182341	CGCGGTGGTGGTACGACATGAAGTGTGGGATTGATGAGATATGATGCATACTGCAGTCCCTGTGGTTGCAAAGGAGTAGTTGGTTGTTAGGAAGCGCAACTAGGACGGACAA
Ano4	ENSMUST00000182341	CGCGGTGGTGGTACGACATGAGGAGTAGTTGGTTGTTAGGAGACTTTTTCATAGAGCACATTCAGCAGCATAAGTTGAGGTGGGAGAGTATTAGCGCAACTAGGACGGACAA
Ano4	ENSMUST00000182341	CGCGGTGGTGGTACGACATGAAGTGTGGGATTGATGAGATATTCACAACAGCGGGACTCCACCTCAGTCGGAAGTTGAGGTGGGAGAGTATTAGCGCAACTAGGACGGACAA
Ano4	ENSMUST00000182341	CGCGGTGGTGGTACGACATGAGGAGTAGTTGGTTGTTAGGAATCAGATCCCAGTCATAAGCGATCACTGCTATAGAGTTGATAGAGGGAGAAAGCGCAACTAGGACGGACAA
Ano4	ENSMUST00000182341	CGCGGTGGTGGTACGACATGAAGTGTGGGATTGATGAGATAGGCATGCAACTTCACAAAGATAATGTCACTATAGAGTTGATAGAGGGAGAAAGCGCAACTAGGACGGACAA
Ano4	ENSMUST00000182341	CGCGGTGGTGGTACGACATGATAGAGTTGATAGAGGGAGAATGTAAATCTTCCGAGGAAGAATGCGATGTAAAGTTGAGGTGGGAGAGTATTAGCGCAACTAGGACGGACAA
Aqp4	ENSMUST00000079081	CGCGGTGGTGGTACGACATGATGTGGAGGGATTGAAGGATATGGATCCCACACCGAGCAAAACAAAGATAAAGGGATGTATTGAAGGAGGATAGCGCAACTAGGACGGACAA
Aqp4	ENSMUST00000079081	CGCGGTGGTGGTACGACATGAGGGATGTATTGAAGGAGGATCGGCACTATGCACTTCATTAATAAGAAGGGATTGGAGGTGTAGGGAGTAAAAGCGCAACTAGGACGGACAA
Aqp4	ENSMUST00000079081	CGCGGTGGTGGTACGACATGAAGGAGGAGGGTAATGATAGACCTCAGAACATGACCATGGCACCGAGAGGCAGGGATGTATTGAAGGAGGATAGCGCAACTAGGACGGACAA
Aqp4	ENSMUST00000079081	CGCGGTGGTGGTACGACATGATTGGAGGTGTAGGGAGTAAAAAGCCACCATGATGCTCTCTCTACTGCAGGATGTGGAGGGATTGAAGGATAAGCGCAACTAGGACGGACAA
Aqp4	ENSMUST00000079081	CGCGGTGGTGGTACGACATGAAGGAGGAGGGTAATGATAGAAGGGGTTTTCTGAGCCACCCCAGTTTATGGATGTGGAGGGATTGAAGGATAAGCGCAACTAGGACGGACAA
Aqp4	ENSMUST00000079081	CGCGGTGGTGGTACGACATGATTGGAGGTGTAGGGAGTAAAATCAAAACAGCATCAGCAGCTAAGATGGGGAAGGAGGAGGGTAATGATAGAAGCGCAACTAGGACGGACAA
Aqp4	ENSMUST00000079081	CGCGGTGGTGGTACGACATGATGTGGAGGGATTGAAGGATACCACGTTGCACCTTGTCTGCATATATTTTAAGGGATGTATTGAAGGAGGATAGCGCAACTAGGACGGACAA
Aqp4	ENSMUST00000079081	CGCGGTGGTGGTACGACATGATTGGAGGTGTAGGGAGTAAACCAAGCAGGAGGTAAATACCTTAAAAGCATAGGGATGTATTGAAGGAGGATAGCGCAACTAGGACGGACAA
Aqp4	ENSMUST00000079081	CGCGGTGGTGGTACGACATGAGGGATGTATTGAAGGAGGATATTGCCTACTGTGTGCCTGGCACTCTGCCAAAGGAGGAGGGTAATGATAGAAGCGCAACTAGGACGGACAA
Aqp4	ENSMUST00000079081	CGCGGTGGTGGTACGACATGATTGGAGGTGTAGGGAGTAAAGCAAAAATAGTGAACACCAACTGGAAAGTGATGTGGAGGGATTGAAGGATAAGCGCAACTAGGACGGACAA
Aqp4	ENSMUST00000079081	CGCGGTGGTGGTACGACATGATGTGGAGGGATTGAAGGATACCTCTGAAGATCGAACGGAAGAGGACTCATAAGGAGGAGGGTAATGATAGAAGCGCAACTAGGACGGACAA
Aqp4	ENSMUST00000079081	CGCGGTGGTGGTACGACATGATTGGAGGTGTAGGGAGTAAATGTGGCCACCACTGATGTGGCCAAAGCACTAAGGAGGAGGGTAATGATAGAAGCGCAACTAGGACGGACAA
Aqp4	ENSMUST00000079081	CGCGGTGGTGGTACGACATGAGGGATGTATTGAAGGAGGATGCGACGTTTGAGCTCCACATCAGGACAGAAATGTGGAGGGATTGAAGGATAAGCGCAACTAGGACGGACAA
Aqp4	ENSMUST00000079081	CGCGGTGGTGGTACGACATGATTGGAGGTGTAGGGAGTAAAACAGGCCAGGATTTTGAAAGAGTAATCAGAAGGGATGTATTGAAGGAGGATAGCGCAACTAGGACGGACAA
Aqp4	ENSMUST00000079081	CGCGGTGGTGGTACGACATGAAGGAGGAGGGTAATGATAGACTGGTTTATACCAGCTAGAGTAAGCAGGATAGGGATGTATTGAAGGAGGATAGCGCAACTAGGACGGACAA
Aqp4	ENSMUST00000079081	CGCGGTGGTGGTACGACATGATGTGGAGGGATTGAAGGATATCAGGTTTAATAGTGGTCCATTATCTCGCTATTGGAGGTGTAGGGAGTAAAAGCGCAACTAGGACGGACAA
Aqp4	ENSMUST00000079081	CGCGGTGGTGGTACGACATGATGTGGAGGGATTGAAGGATACAATGCCGATTGTCGATGCATATCGTGGGAAAGGAGGAGGGTAATGATAGAAGCGCAACTAGGACGGACAA
Aqp4	ENSMUST00000079081	CGCGGTGGTGGTACGACATGATTGGAGGTGTAGGGAGTAAACCTGGACATGAACTCAGAAAAGTTGAGGTAAAGGAGGAGGGTAATGATAGAAGCGCAACTAGGACGGACAA
Aqp4	ENSMUST00000079081	CGCGGTGGTGGTACGACATGAGGGATGTATTGAAGGAGGATTGATGGTTGATATCACCTTCCGAACTGAAGATGTGGAGGGATTGAAGGATAAGCGCAACTAGGACGGACAA
Aqp4	ENSMUST00000079081	CGCGGTGGTGGTACGACATGATTGGAGGTGTAGGGAGTAAAGAGCGTCTCATGGCTTTTGTAAGATTGTCTAGGGATGTATTGAAGGAGGATAGCGCAACTAGGACGGACAA
Aqp4	ENSMUST00000079081	CGCGGTGGTGGTACGACATGAGGGATGTATTGAAGGAGGATTTTACTGGCAGAGCCGTGAGTGAAATGCAAAAGGAGGAGGGTAATGATAGAAGCGCAACTAGGACGGACAA
Aqp4	ENSMUST00000079081	CGCGGTGGTGGTACGACATGATTGGAGGTGTAGGGAGTAAAGCTTAGGTGGTTAATGGTTTGTGGTACATTATGTGGAGGGATTGAAGGATAAGCGCAACTAGGACGGACAA
Aqp4	ENSMUST00000079081	CGCGGTGGTGGTACGACATGAAGGAGGAGGGTAATGATAGAGCTGTCACTGGAAATGACTGTTAAAGTGAGATGTGGAGGGATTGAAGGATAAGCGCAACTAGGACGGACAA
Aqp4	ENSMUST00000079081	CGCGGTGGTGGTACGACATGAAGGAGGAGGGTAATGATAGAGAAGAAATGGCTCTTCTCTCTTCCACTACTATTGGAGGTGTAGGGAGTAAAAGCGCAACTAGGACGGACAA
Aqp4	ENSMUST00000079081	CGCGGTGGTGGTACGACATGATGTGGAGGGATTGAAGGATACTGCGCGGCTTTGCTGAAGGCTTCCTTAAGAGGGATGTATTGAAGGAGGATAGCGCAACTAGGACGGACAA
Aqp4	ENSMUST00000079081	CGCGGTGGTGGTACGACATGATTGGAGGTGTAGGGAGTAAACTGCATCGATGTCATTAGAAAGGGACAATTAGGGATGTATTGAAGGAGGATAGCGCAACTAGGACGGACAA
Aqp4	ENSMUST00000079081	CGCGGTGGTGGTACGACATGAGGGATGTATTGAAGGAGGATGGATTCTGAGGGGGAGAGGATTATAGTGAAAAGGAGGAGGGTAATGATAGAAGCGCAACTAGGACGGACAA
Aqp4	ENSMUST00000079081	CGCGGTGGTGGTACGACATGATGTGGAGGGATTGAAGGATATTCATCAGGGAGCAGCTGTGGCCAGCAGTGATTGGAGGTGTAGGGAGTAAAAGCGCAACTAGGACGGACAA
Aqp4	ENSMUST00000079081	CGCGGTGGTGGTACGACATGAAGGAGGAGGGTAATGATAGAAAAGGGAGATGAGGACCATGTCCACAGGTAATGTGGAGGGATTGAAGGATAAGCGCAACTAGGACGGACAA
Aqp4	ENSMUST00000079081	CGCGGTGGTGGTACGACATGATTGGAGGTGTAGGGAGTAAACCCTCCATTACCAGCTATTTACAAGCTAGTAAGGAGGAGGGTAATGATAGAAGCGCAACTAGGACGGACAA
Aqp4	ENSMUST00000079081	CGCGGTGGTGGTACGACATGAGGGATGTATTGAAGGAGGATGCAGATGGGGTAACTAGGAGCTTTGCACAGATGTGGAGGGATTGAAGGATAAGCGCAACTAGGACGGACAA
Aqp4	ENSMUST00000079081	CGCGGTGGTGGTACGACATGATTGGAGGTGTAGGGAGTAAAGAAGTTATGTGCCAAAAGTGAATATCCGCAAGGGATGTATTGAAGGAGGATAGCGCAACTAGGACGGACAA
Aqp4	ENSMUST00000079081	CGCGGTGGTGGTACGACATGAAGGAGGAGGGTAATGATAGAGCACCATGGTAGCAATGCTGAGTCCAAAGCAGGGATGTATTGAAGGAGGATAGCGCAACTAGGACGGACAA
Aqp4	ENSMUST00000079081	CGCGGTGGTGGTACGACATGATTGGAGGTGTAGGGAGTAAAGAAAGAATCGGCAGAAACCTCCCCTGGGAGATGTGGAGGGATTGAAGGATAAGCGCAACTAGGACGGACAA
Aqp4	ENSMUST00000079081	CGCGGTGGTGGTACGACATGAAGGAGGAGGGTAATGATAGACCAGTGGTTTGCCCAGTTTCCCATGATAACATGTGGAGGGATTGAAGGATAAGCGCAACTAGGACGGACAA
Aqp4	ENSMUST00000079081	CGCGGTGGTGGTACGACATGAAGGAGGAGGGTAATGATAGAGACATATTGCAAAGACGAAGAGTGTGAAGTATTGGAGGTGTAGGGAGTAAAAGCGCAACTAGGACGGACAA
Aqp4	ENSMUST00000079081	CGCGGTGGTGGTACGACATGAGGGATGTATTGAAGGAGGATCACAAACGAAGCAAGCTGTCTAGCATAATAATGTGGAGGGATTGAAGGATAAGCGCAACTAGGACGGACAA
Aqp4	ENSMUST00000079081	CGCGGTGGTGGTACGACATGATTGGAGGTGTAGGGAGTAAAGGGAAAATCCCCGATCTCCTAATATGTTGTAGGGATGTATTGAAGGAGGATAGCGCAACTAGGACGGACAA
Aqp4	ENSMUST00000079081	CGCGGTGGTGGTACGACATGAGGGATGTATTGAAGGAGGATCCAATCCTCCAACCACACTGGGAGGTGTGAAAGGAGGAGGGTAATGATAGAAGCGCAACTAGGACGGACAA
Aqp4	ENSMUST00000079081	CGCGGTGGTGGTACGACATGATTGGAGGTGTAGGGAGTAAAATATGCTGCCCTCGTGCCTTTCTGGGAACTATGTGGAGGGATTGAAGGATAAGCGCAACTAGGACGGACAA
Aqp4	ENSMUST00000079081	CGCGGTGGTGGTACGACATGATGTGGAGGGATTGAAGGATAGGAAGAAGTTACTGCATGTCTTCTCCTGAAAAGGAGGAGGGTAATGATAGAAGCGCAACTAGGACGGACAA
Aqp4	ENSMUST00000079081	CGCGGTGGTGGTACGACATGAAGGAGGAGGGTAATGATAGAGGGTTTCCACAGAGCATTCGATGGGCGGAAATTGGAGGTGTAGGGAGTAAAAGCGCAACTAGGACGGACAA
Aqp4	ENSMUST00000079081	CGCGGTGGTGGTACGACATGATGTGGAGGGATTGAAGGATACACACATCAGTTTCCTAGCACCGAAGAGAAAGGGATGTATTGAAGGAGGATAGCGCAACTAGGACGGACAA
Aqp4	ENSMUST00000079081	CGCGGTGGTGGTACGACATGAGGGATGTATTGAAGGAGGATGCCTTCAGTGCTGTCCTCTAGTCATACGGAATTGGAGGTGTAGGGAGTAAAAGCGCAACTAGGACGGACAA
Aqp4	ENSMUST00000079081	CGCGGTGGTGGTACGACATGAGGGATGTATTGAAGGAGGATGCGTGGCCAGAAATTCTGCTGAGACTGCCTAAGGAGGAGGGTAATGATAGAAGCGCAACTAGGACGGACAA
Aqp4	ENSMUST00000079081	CGCGGTGGTGGTACGACATGATTGGAGGTGTAGGGAGTAAAGCTGGCTCCAGTATAATTGATTGCAAACAAATGTGGAGGGATTGAAGGATAAGCGCAACTAGGACGGACAA
Aqp4	ENSMUST00000079081	CGCGGTGGTGGTACGACATGATGTGGAGGGATTGAAGGATAACACCATGGCTACAGTCACAGCGGGATTGAAAGGAGGAGGGTAATGATAGAAGCGCAACTAGGACGGACAA
Aqp4	ENSMUST00000079081	CGCGGTGGTGGTACGACATGAAGGAGGAGGGTAATGATAGAGATGTATTAGCAATGGCCCTTGCTAATGTTATTGGAGGTGTAGGGAGTAAAAGCGCAACTAGGACGGACAA
Aqp4	ENSMUST00000079081	CGCGGTGGTGGTACGACATGATGTGGAGGGATTGAAGGATAGCACAATTCCAAGTTCACGTATCCTGTAGTAGGGATGTATTGAAGGAGGATAGCGCAACTAGGACGGACAA
Aqp4	ENSMUST00000079081	CGCGGTGGTGGTACGACATGATTGGAGGTGTAGGGAGTAAACAGTTGGCATTGTTTCATGGCTCGTATAAAAGGGATGTATTGAAGGAGGATAGCGCAACTAGGACGGACAA
Aqp4	ENSMUST00000079081	CGCGGTGGTGGTACGACATGAGGGATGTATTGAAGGAGGATCTCCACCTCCATGTAGCTCCCTTTTGTCTGAAGGAGGAGGGTAATGATAGAAGCGCAACTAGGACGGACAA
Aqp4	ENSMUST00000079081	CGCGGTGGTGGTACGACATGATGTGGAGGGATTGAAGGATACGCTCTGATCTTAAGTCTGCGTGGTATATTATTGGAGGTGTAGGGAGTAAAAGCGCAACTAGGACGGACAA
Aqp4	ENSMUST00000079081	CGCGGTGGTGGTACGACATGAAGGAGGAGGGTAATGATAGAGTAACATCAGTTCGTTTGGAATCACAGCTGATGTGGAGGGATTGAAGGATAAGCGCAACTAGGACGGACAA
Aqp4	ENSMUST00000079081	CGCGGTGGTGGTACGACATGAAGGAGGAGGGTAATGATAGAGCACATGATTCTGTGACATACTGCATTTTGATTGGAGGTGTAGGGAGTAAAAGCGCAACTAGGACGGACAA
Aqp4	ENSMUST00000079081	CGCGGTGGTGGTACGACATGAGGGATGTATTGAAGGAGGATGTGTATCTGTCAGTAGCTGTCTCTTGGGAAATGTGGAGGGATTGAAGGATAAGCGCAACTAGGACGGACAA
Aqp4	ENSMUST00000079081	CGCGGTGGTGGTACGACATGAGGGATGTATTGAAGGAGGATGAAGCAAGAAACCCGCAAGTGTCTAATTTAATTGGAGGTGTAGGGAGTAAAAGCGCAACTAGGACGGACAA
Aqp4	ENSMUST00000079081	CGCGGTGGTGGTACGACATGAAGGAGGAGGGTAATGATAGATTCTCACCCCCCCCATTGATAATAGTAAAAAGGGATGTATTGAAGGAGGATAGCGCAACTAGGACGGACAA
Aqp4	ENSMUST00000079081	CGCGGTGGTGGTACGACATGATGTGGAGGGATTGAAGGATATGCGGGTCCAAAAGATCGAGCTGGATTCATATTGGAGGTGTAGGGAGTAAAAGCGCAACTAGGACGGACAA
Aqp4	ENSMUST00000079081	CGCGGTGGTGGTACGACATGATGTGGAGGGATTGAAGGATATAGACACCAACTAAAAGTCAGGACTCGACTAAGGAGGAGGGTAATGATAGAAGCGCAACTAGGACGGACAA
Aqp4	ENSMUST00000079081	CGCGGTGGTGGTACGACATGAAGGAGGAGGGTAATGATAGAAGTCCCTTCATTTTGAGATGTCAGGGTTCTATTGGAGGTGTAGGGAGTAAAAGCGCAACTAGGACGGACAA
Aqp4	ENSMUST00000079081	CGCGGTGGTGGTACGACATGATGTGGAGGGATTGAAGGATAGCCACAGACACAAAACTGCCATTAACAATAAGGGATGTATTGAAGGAGGATAGCGCAACTAGGACGGACAA
Aqp4	ENSMUST00000079081	CGCGGTGGTGGTACGACATGAGGGATGTATTGAAGGAGGATGATAGTGGCAAATCACAGGAACAAGTTGTAATTGGAGGTGTAGGGAGTAAAAGCGCAACTAGGACGGACAA
Aqp4	ENSMUST00000079081	CGCGGTGGTGGTACGACATGAGGGATGTATTGAAGGAGGATCCAGGTAGAGGATGCCGGCTCCAATGATGGAAGGAGGAGGGTAATGATAGAAGCGCAACTAGGACGGACAA
Aqp4	ENSMUST00000079081	CGCGGTGGTGGTACGACATGATTGGAGGTGTAGGGAGTAAAAGACAATACCTCTCCCGAAGAGTCTTTCCCATGTGGAGGGATTGAAGGATAAGCGCAACTAGGACGGACAA
Aqp4	ENSMUST00000079081	CGCGGTGGTGGTACGACATGATGTGGAGGGATTGAAGGATAAGGCTGTGTGCTCACCCCTTTATTTGGCAAAAGGAGGAGGGTAATGATAGAAGCGCAACTAGGACGGACAA
Aqp4	ENSMUST00000079081	CGCGGTGGTGGTACGACATGAAGGAGGAGGGTAATGATAGACTGAAATGTGGCCCATGCTCCCAGCATCTGATTGGAGGTGTAGGGAGTAAAAGCGCAACTAGGACGGACAA
Aqp4	ENSMUST00000079081	CGCGGTGGTGGTACGACATGAGGGATGTATTGAAGGAGGATCGGTGAGGTTTCCATGAACCGTGGTGACTCATGTGGAGGGATTGAAGGATAAGCGCAACTAGGACGGACAA
Aqp4	ENSMUST00000079081	CGCGGTGGTGGTACGACATGAGGGATGTATTGAAGGAGGATATAGTCCACTTTCAAGTAGAGGCCATGCTTATTGGAGGTGTAGGGAGTAAAAGCGCAACTAGGACGGACAA
Aqp4	ENSMUST00000079081	CGCGGTGGTGGTACGACATGAAGGAGGAGGGTAATGATAGAAGCGCCCATGATTGGTCCAACCCAATATATAGGGATGTATTGAAGGAGGATAGCGCAACTAGGACGGACAA
Aqp4	ENSMUST00000079081	CGCGGTGGTGGTACGACATGATTGGAGGTGTAGGGAGTAAAGGCAAAACTTGACCAGATCTTGGTTCATAAATGTGGAGGGATTGAAGGATAAGCGCAACTAGGACGGACAA
Aqp4	ENSMUST00000079081	CGCGGTGGTGGTACGACATGAAGGAGGAGGGTAATGATAGACGGACTTAGCGATGCTGATCTTTCGTGTGCATGTGGAGGGATTGAAGGATAAGCGCAACTAGGACGGACAA
Aqp4	ENSMUST00000079081	CGCGGTGGTGGTACGACATGATTGGAGGTGTAGGGAGTAAAGCTGCTAGCAAACAAATCACTAAGCTATGAAAGGAGGAGGGTAATGATAGAAGCGCAACTAGGACGGACAA
Aqp4	ENSMUST00000079081	CGCGGTGGTGGTACGACATGAGGGATGTATTGAAGGAGGATCAAATCTGTTTCCTTAATGGGTGGCAGGAAATGTGGAGGGATTGAAGGATAAGCGCAACTAGGACGGACAA
Aqp4	ENSMUST00000079081	CGCGGTGGTGGTACGACATGAGGGATGTATTGAAGGAGGATTTCCTTCTGTTCTCCTTTGACAGACTATGTATTGGAGGTGTAGGGAGTAAAAGCGCAACTAGGACGGACAA
Aqp4	ENSMUST00000079081	CGCGGTGGTGGTACGACATGAGGGATGTATTGAAGGAGGATACAGTTGGAATTGTGCTTGGGAGAAGAAAGAAGGAGGAGGGTAATGATAGAAGCGCAACTAGGACGGACAA
Aqp4	ENSMUST00000079081	CGCGGTGGTGGTACGACATGATTGGAGGTGTAGGGAGTAAAGAACCCAGCCACACTGCTAATACTTTTAATATGTGGAGGGATTGAAGGATAAGCGCAACTAGGACGGACAA
Aqp4	ENSMUST00000079081	CGCGGTGGTGGTACGACATGAAGGAGGAGGGTAATGATAGATAGCACACCTTGTTCCACCTCCCACCAGACATGTGGAGGGATTGAAGGATAAGCGCAACTAGGACGGACAA
Aqp4	ENSMUST00000079081	CGCGGTGGTGGTACGACATGATTGGAGGTGTAGGGAGTAAACCCCCAGGCACTGTGCAATGATGTAGAAGAAAGGAGGAGGGTAATGATAGAAGCGCAACTAGGACGGACAA
Aqp4	ENSMUST00000079081	CGCGGTGGTGGTACGACATGATGTGGAGGGATTGAAGGATACAAAATGGCAAACAAATTCCCCAGTTTTGCAGGGATGTATTGAAGGAGGATAGCGCAACTAGGACGGACAA
Aqp4	ENSMUST00000079081	CGCGGTGGTGGTACGACATGATTGGAGGTGTAGGGAGTAAATGACTTAGGCTACAGGAAACAGTTTCTTGTAGGGATGTATTGAAGGAGGATAGCGCAACTAGGACGGACAA
Aqp4	ENSMUST00000079081	CGCGGTGGTGGTACGACATGAGGGATGTATTGAAGGAGGATCAGTGTATGGACCACCTTGAAATTTGTGGTAAGGAGGAGGGTAATGATAGAAGCGCAACTAGGACGGACAA
Aqp4	ENSMUST00000079081	CGCGGTGGTGGTACGACATGATGTGGAGGGATTGAAGGATAGGCAAAGCAGTATGGGAGAAATAAATGGTTATTGGAGGTGTAGGGAGTAAAAGCGCAACTAGGACGGACAA
Aqp4	ENSMUST00000079081	CGCGGTGGTGGTACGACATGATGTGGAGGGATTGAAGGATATGGTGTCATCCACAAGGCAATAGACCCCTGAAGGAGGAGGGTAATGATAGAAGCGCAACTAGGACGGACAA
Aqp4	ENSMUST00000079081	CGCGGTGGTGGTACGACATGAAGGAGGAGGGTAATGATAGAGTCCAATTGCAACGGAAAATCCAATTGCTAATTGGAGGTGTAGGGAGTAAAAGCGCAACTAGGACGGACAA
Aqp4	ENSMUST00000079081	CGCGGTGGTGGTACGACATGAGGGATGTATTGAAGGAGGATAGTCAAGTTCTGGTCTAAAATGTCTCTGCTATGTGGAGGGATTGAAGGATAAGCGCAACTAGGACGGACAA
Aqp4	ENSMUST00000079081	CGCGGTGGTGGTACGACATGATTGGAGGTGTAGGGAGTAAAGACATACTCATAAAGGGCACCTGCCAGCACAGGGATGTATTGAAGGAGGATAGCGCAACTAGGACGGACAA
Aqp4	ENSMUST00000079081	CGCGGTGGTGGTACGACATGAAGGAGGAGGGTAATGATAGAGAAATCGACATTTGCAGCACATTGTCTAAGAGGGATGTATTGAAGGAGGATAGCGCAACTAGGACGGACAA
Aqp4	ENSMUST00000079081	CGCGGTGGTGGTACGACATGATTGGAGGTGTAGGGAGTAAACAGTGGGGTTAGAGCAGTGCACACATTGCCATGTGGAGGGATTGAAGGATAAGCGCAACTAGGACGGACAA
Aqp4	ENSMUST00000079081	CGCGGTGGTGGTACGACATGATGTGGAGGGATTGAAGGATATCCCAGAGACTACCAACTCCTTATGAAATCAAGGAGGAGGGTAATGATAGAAGCGCAACTAGGACGGACAA
Aqp4	ENSMUST00000079081	CGCGGTGGTGGTACGACATGAAGGAGGAGGGTAATGATAGAGTGTCTGTGTTCTCCTCCTGAGGGAACAGAATTGGAGGTGTAGGGAGTAAAAGCGCAACTAGGACGGACAA
Aqp4	ENSMUST00000079081	CGCGGTGGTGGTACGACATGAGGGATGTATTGAAGGAGGATTCACTCTCTGCCTTCAAACAGTAGAATGTAATGTGGAGGGATTGAAGGATAAGCGCAACTAGGACGGACAA
Aqp4	ENSMUST00000079081	CGCGGTGGTGGTACGACATGATTGGAGGTGTAGGGAGTAAATTCCCTCTCCGTGTGATGGATGCAAGGCAGAGGGATGTATTGAAGGAGGATAGCGCAACTAGGACGGACAA
Asic4	ENSMUST00000037708	CGCGGTGGTGGTACGACATGATGTGGAGGGATTGAAGGATAAGGTTGCAGGGTGTAGGGCAGAAGCATGGGATGAAAGGAATGGGTTGTGGTAGCGCAACTAGGACGGACAA
Asic4	ENSMUST00000037708	CGCGGTGGTGGTACGACATGATTGGAGGTGTAGGGAGTAAATCCCATAGCGAGTATAGACCACAGAGAAGTATGAAAGGAATGGGTTGTGGTAGCGCAACTAGGACGGACAA
Asic4	ENSMUST00000037708	CGCGGTGGTGGTACGACATGATGAAAGGAATGGGTTGTGGTTGCCATTAGGGCTAGGACCCTGACTGTCCTAGAGATTAGAGATGAGTTGGAAGCGCAACTAGGACGGACAA
Asic4	ENSMUST00000037708	CGCGGTGGTGGTACGACATGATTGGAGGTGTAGGGAGTAAATAGGGCTTCGAAAAAGACATCCAGGACCAAATGTGGAGGGATTGAAGGATAAGCGCAACTAGGACGGACAA
Asic4	ENSMUST00000037708	CGCGGTGGTGGTACGACATGATGTGGAGGGATTGAAGGATAACCTCTAGTCTGGTCTCCAGCCCTTCCTGGAGAGATTAGAGATGAGTTGGAAGCGCAACTAGGACGGACAA
Asic4	ENSMUST00000037708	CGCGGTGGTGGTACGACATGAGAGATTAGAGATGAGTTGGAACCCTAGTCCTGGCCTCTCAGTGAGCACCAATTGGAGGTGTAGGGAGTAAAAGCGCAACTAGGACGGACAA
Asic4	ENSMUST00000037708	CGCGGTGGTGGTACGACATGATGTGGAGGGATTGAAGGATAACTTGTGGTGGGGCTGGTACAGGGGGAACTATGAAAGGAATGGGTTGTGGTAGCGCAACTAGGACGGACAA
Asic4	ENSMUST00000037708	CGCGGTGGTGGTACGACATGATTGGAGGTGTAGGGAGTAAAGCTAGCCCCAATGAACAGGCCCATCTGTCCATGAAAGGAATGGGTTGTGGTAGCGCAACTAGGACGGACAA
Asic4	ENSMUST00000037708	CGCGGTGGTGGTACGACATGATGAAAGGAATGGGTTGTGGTGTAACGAGTCAGGTTGCAGGGTGTAGGGCAAGAGATTAGAGATGAGTTGGAAGCGCAACTAGGACGGACAA
Asic4	ENSMUST00000037708	CGCGGTGGTGGTACGACATGATTGGAGGTGTAGGGAGTAAAATCTCCAGCAAGGTGAGGATGCTAGCCCCAATGTGGAGGGATTGAAGGATAAGCGCAACTAGGACGGACAA
Asic4	ENSMUST00000037708	CGCGGTGGTGGTACGACATGATGTGGAGGGATTGAAGGATATCACTGCTACTGTCCCTCCCTGGACAGCAGAGAGATTAGAGATGAGTTGGAAGCGCAACTAGGACGGACAA
Asic4	ENSMUST00000037708	CGCGGTGGTGGTACGACATGATTGGAGGTGTAGGGAGTAAACTTCTCCTTGGGTTTTGCATCCTCCTCAGCAGAGATTAGAGATGAGTTGGAAGCGCAACTAGGACGGACAA
Asic4	ENSMUST00000037708	CGCGGTGGTGGTACGACATGATGTGGAGGGATTGAAGGATATATAAAACCAATCTCTAGGGAGCAAGGCCTATGAAAGGAATGGGTTGTGGTAGCGCAACTAGGACGGACAA
Asic4	ENSMUST00000037708	CGCGGTGGTGGTACGACATGATTGGAGGTGTAGGGAGTAAACTCTGTTCATCCCCTGCCTCCTTCTCCTTGATGAAAGGAATGGGTTGTGGTAGCGCAACTAGGACGGACAA
Asic4	ENSMUST00000037708	CGCGGTGGTGGTACGACATGAGAGATTAGAGATGAGTTGGAACAGAGAAGTTGCTGGCGGAGCAGTGGTGCATGAAAGGAATGGGTTGTGGTAGCGCAACTAGGACGGACAA
Asic4	ENSMUST00000037708	CGCGGTGGTGGTACGACATGATGTGGAGGGATTGAAGGATATGTCAGGCTCTGGATAGCGAAGGCCAGCTGATTGGAGGTGTAGGGAGTAAAAGCGCAACTAGGACGGACAA
Asic4	ENSMUST00000037708	CGCGGTGGTGGTACGACATGATGTGGAGGGATTGAAGGATAGTCTCATTGCGGTTGTACTTCCTTGCCAGGAGAGATTAGAGATGAGTTGGAAGCGCAACTAGGACGGACAA
Asic4	ENSMUST00000037708	CGCGGTGGTGGTACGACATGAGAGATTAGAGATGAGTTGGATGGTGATGGTTGGGAAGCAGGCTGCTAGCCATTGGAGGTGTAGGGAGTAAAAGCGCAACTAGGACGGACAA
Asic4	ENSMUST00000037708	CGCGGTGGTGGTACGACATGATGAAAGGAATGGGTTGTGGTCCTCATAGATGTAGTCAAGGATCTCCAGCAATGTGGAGGGATTGAAGGATAAGCGCAACTAGGACGGACAA
Asic4	ENSMUST00000037708	CGCGGTGGTGGTACGACATGATGAAAGGAATGGGTTGTGGTAGCGCAGTCGGCAGGCAGACACACTATAGGATTGGAGGTGTAGGGAGTAAAAGCGCAACTAGGACGGACAA
Asic4	ENSMUST00000037708	CGCGGTGGTGGTACGACATGAGAGATTAGAGATGAGTTGGACTCCCTCCATATGGGTAGGTATTCCTCCTGATGAAAGGAATGGGTTGTGGTAGCGCAACTAGGACGGACAA
Asic4	ENSMUST00000037708	CGCGGTGGTGGTACGACATGATGTGGAGGGATTGAAGGATAAAGTCTGGAAGCCTGGGGACACGCCAAACCATTGGAGGTGTAGGGAGTAAAAGCGCAACTAGGACGGACAA
Asic4	ENSMUST00000037708	CGCGGTGGTGGTACGACATGATGTGGAGGGATTGAAGGATACGAGTGCCGGAAGCGGTTGATGTTGCAGAGAGAGATTAGAGATGAGTTGGAAGCGCAACTAGGACGGACAA
Asic4	ENSMUST00000037708	CGCGGTGGTGGTACGACATGATTGGAGGTGTAGGGAGTAAATGGTCTCGTTGCCTGGCATGTGCACCATCCAGAGATTAGAGATGAGTTGGAAGCGCAACTAGGACGGACAA
Asic4	ENSMUST00000037708	CGCGGTGGTGGTACGACATGATGAAAGGAATGGGTTGTGGTAAGGTCTGAAAGGTCTTTCCACCCACTCCCATGTGGAGGGATTGAAGGATAAGCGCAACTAGGACGGACAA
Asic4	ENSMUST00000037708	CGCGGTGGTGGTACGACATGATTGGAGGTGTAGGGAGTAAACAGCACTGTTCTAGCAAGCAAAGTCTTCAAATGAAAGGAATGGGTTGTGGTAGCGCAACTAGGACGGACAA
Asic4	ENSMUST00000037708	CGCGGTGGTGGTACGACATGATGAAAGGAATGGGTTGTGGTCCTCCCCTGCAGTCCCACCCTTCTATGTCTAGAGATTAGAGATGAGTTGGAAGCGCAACTAGGACGGACAA
Asic4	ENSMUST00000037708	CGCGGTGGTGGTACGACATGATGTGGAGGGATTGAAGGATAAAGGCAGCCAGTGAGGTGAGTAGGGCCAGTATTGGAGGTGTAGGGAGTAAAAGCGCAACTAGGACGGACAA
Asic4	ENSMUST00000037708	CGCGGTGGTGGTACGACATGATGTGGAGGGATTGAAGGATAAGTATAGACCACAGAGAAGTTGCTGGCGGAAGAGATTAGAGATGAGTTGGAAGCGCAACTAGGACGGACAA
Asic4	ENSMUST00000037708	CGCGGTGGTGGTACGACATGATTGGAGGTGTAGGGAGTAAAACTTGCCTTCTGCCATTAGGGCTAGGACCCAGAGATTAGAGATGAGTTGGAAGCGCAACTAGGACGGACAA
Asic4	ENSMUST00000037708	CGCGGTGGTGGTACGACATGATGAAAGGAATGGGTTGTGGTTGACTGTCCTGTGTCACCCTCCCCTGCAGTATGTGGAGGGATTGAAGGATAAGCGCAACTAGGACGGACAA
Asic4	ENSMUST00000037708	CGCGGTGGTGGTACGACATGATTGGAGGTGTAGGGAGTAAAAAGTTAGCCGCTGTTCCTGGCAGGACACAAATGAAAGGAATGGGTTGTGGTAGCGCAACTAGGACGGACAA
Asic4	ENSMUST00000037708	CGCGGTGGTGGTACGACATGAGAGATTAGAGATGAGTTGGAACTGGCCAGAGCCTCACTGCTACTGTCCCTATGAAAGGAATGGGTTGTGGTAGCGCAACTAGGACGGACAA
Asic4	ENSMUST00000037708	CGCGGTGGTGGTACGACATGATTGGAGGTGTAGGGAGTAAAAGCCCCTGTTGGGGATCTTGACCATGGAGAATGTGGAGGGATTGAAGGATAAGCGCAACTAGGACGGACAA
Asic4	ENSMUST00000037708	CGCGGTGGTGGTACGACATGATGTGGAGGGATTGAAGGATAGAGCAGGGAGTATAGACAAGAAGGACCCTTAGAGATTAGAGATGAGTTGGAAGCGCAACTAGGACGGACAA
Asic4	ENSMUST00000037708	CGCGGTGGTGGTACGACATGATTGGAGGTGTAGGGAGTAAACATGAAGGGAACTTGTGGTGGGGCTGGTACAGAGATTAGAGATGAGTTGGAAGCGCAACTAGGACGGACAA
Asic4	ENSMUST00000037708	CGCGGTGGTGGTACGACATGATGAAAGGAATGGGTTGTGGTTGGGGCAGATAAGTTAGCCGCTGTTCCTGGATGTGGAGGGATTGAAGGATAAGCGCAACTAGGACGGACAA
Asic4	ENSMUST00000037708	CGCGGTGGTGGTACGACATGATTGGAGGTGTAGGGAGTAAACCCACCCAGTCCCTAACTATATACAAATGTATGAAAGGAATGGGTTGTGGTAGCGCAACTAGGACGGACAA
Asic4	ENSMUST00000037708	CGCGGTGGTGGTACGACATGATGAAAGGAATGGGTTGTGGTTCAGATTGGCCAGGTGGAAGATATCAGCATAGAGATTAGAGATGAGTTGGAAGCGCAACTAGGACGGACAA
Asic4	ENSMUST00000037708	CGCGGTGGTGGTACGACATGATTGGAGGTGTAGGGAGTAAAGTCAGCGTAGAGGCCCAGTTTCATGGGTACATGTGGAGGGATTGAAGGATAAGCGCAACTAGGACGGACAA
Asic4	ENSMUST00000037708	CGCGGTGGTGGTACGACATGAGAGATTAGAGATGAGTTGGATTCTATGTCTGTGTCCCACCCCCACCCAGTATGTGGAGGGATTGAAGGATAAGCGCAACTAGGACGGACAA
Asic4	ENSMUST00000037708	CGCGGTGGTGGTACGACATGAGAGATTAGAGATGAGTTGGAGGTTGTACTTCCTTGCCAGGTATCTGGCTGATTGGAGGTGTAGGGAGTAAAAGCGCAACTAGGACGGACAA
Asic4	ENSMUST00000037708	CGCGGTGGTGGTACGACATGATGTGGAGGGATTGAAGGATACTAGCAAGCAAAGTCTTCAAAGAGGCTTCCATGAAAGGAATGGGTTGTGGTAGCGCAACTAGGACGGACAA
Asic4	ENSMUST00000037708	CGCGGTGGTGGTACGACATGATTGGAGGTGTAGGGAGTAAACCCTCCCCCTATGCTCAGCCAAGGTCTGAAATGAAAGGAATGGGTTGTGGTAGCGCAACTAGGACGGACAA
Asic4	ENSMUST00000037708	CGCGGTGGTGGTACGACATGATGAAAGGAATGGGTTGTGGTTGAAGCTCAGGCTCCCTGAGCTCGCTTTCCAGAGATTAGAGATGAGTTGGAAGCGCAACTAGGACGGACAA
Asic4	ENSMUST00000037708	CGCGGTGGTGGTACGACATGATGTGGAGGGATTGAAGGATACCCTTATATAGGTCTCATTGCGGTTGTACTATTGGAGGTGTAGGGAGTAAAAGCGCAACTAGGACGGACAA
Asic4	ENSMUST00000037708	CGCGGTGGTGGTACGACATGAGAGATTAGAGATGAGTTGGACAAGGGAGTCCAGTGTGTGGTCGGCACATTATGTGGAGGGATTGAAGGATAAGCGCAACTAGGACGGACAA
Asic4	ENSMUST00000037708	CGCGGTGGTGGTACGACATGAGAGATTAGAGATGAGTTGGATGTTGCAGAGGGTGACAGCCGGAAAACCCGATTGGAGGTGTAGGGAGTAAAAGCGCAACTAGGACGGACAA
Asic4	ENSMUST00000037708	CGCGGTGGTGGTACGACATGATGAAAGGAATGGGTTGTGGTCATGCAGAGTGCTGGTGCTGGCAAAGGTGGATGTGGAGGGATTGAAGGATAAGCGCAACTAGGACGGACAA
Asic4	ENSMUST00000037708	CGCGGTGGTGGTACGACATGATTGGAGGTGTAGGGAGTAAAACAATCTCGATCGGCATCTGTCCCCGGCTGATGAAAGGAATGGGTTGTGGTAGCGCAACTAGGACGGACAA
Asic4	ENSMUST00000037708	CGCGGTGGTGGTACGACATGATGAAAGGAATGGGTTGTGGTTATAGACAAGAAGGACCCTTGTGCAAGGCAAGAGATTAGAGATGAGTTGGAAGCGCAACTAGGACGGACAA
Asic4	ENSMUST00000037708	CGCGGTGGTGGTACGACATGATGTGGAGGGATTGAAGGATATTGAGCATGTCAGCAAGCTGGTGGCCAGTGATTGGAGGTGTAGGGAGTAAAAGCGCAACTAGGACGGACAA
Asic4	ENSMUST00000037708	CGCGGTGGTGGTACGACATGATGTGGAGGGATTGAAGGATAGCCCACTGAAGTTGCAGCTCTTGAGCATGTAGAGATTAGAGATGAGTTGGAAGCGCAACTAGGACGGACAA
Asic4	ENSMUST00000037708	CGCGGTGGTGGTACGACATGATTGGAGGTGTAGGGAGTAAACCTCTTTATTCCCAATTTCACCAGCACTTTAGAGATTAGAGATGAGTTGGAAGCGCAACTAGGACGGACAA
Asic4	ENSMUST00000037708	CGCGGTGGTGGTACGACATGATGAAAGGAATGGGTTGTGGTTGCCCCAAGGCTGGGGCAGATAAGTTAGCCATGTGGAGGGATTGAAGGATAAGCGCAACTAGGACGGACAA
Asic4	ENSMUST00000037708	CGCGGTGGTGGTACGACATGATGAAAGGAATGGGTTGTGGTACCATGGAGATCTCTTTGCCGTAACGAGTCATTGGAGGTGTAGGGAGTAAAAGCGCAACTAGGACGGACAA
Asic4	ENSMUST00000037708	CGCGGTGGTGGTACGACATGATGAAAGGAATGGGTTGTGGTACACGCCAAACCCCAGCTGGTGGATGTAGGAGAGATTAGAGATGAGTTGGAAGCGCAACTAGGACGGACAA
Asic4	ENSMUST00000037708	CGCGGTGGTGGTACGACATGATTGGAGGTGTAGGGAGTAAAACCTGCCTGGGAGCAGGGAGTATAGACAAGATGTGGAGGGATTGAAGGATAAGCGCAACTAGGACGGACAA
Asic4	ENSMUST00000037708	CGCGGTGGTGGTACGACATGATGTGGAGGGATTGAAGGATAATCTCTAGGGAGCAAGGCCTGAGAAGGCCGAGAGATTAGAGATGAGTTGGAAGCGCAACTAGGACGGACAA
Asic4	ENSMUST00000037708	CGCGGTGGTGGTACGACATGAGAGATTAGAGATGAGTTGGACCCCTGCCTCCTTCTCCTTGGGTTTTGCATATTGGAGGTGTAGGGAGTAAAAGCGCAACTAGGACGGACAA
Asic4	ENSMUST00000037708	CGCGGTGGTGGTACGACATGATGTGGAGGGATTGAAGGATAATGGGTAGGTATTCCTCCTGCTGGATGTCTATGAAAGGAATGGGTTGTGGTAGCGCAACTAGGACGGACAA
Asic4	ENSMUST00000037708	CGCGGTGGTGGTACGACATGATGAAAGGAATGGGTTGTGGTGTGTCCCACCCCCACCCAGTCCCTAACTATATTGGAGGTGTAGGGAGTAAAAGCGCAACTAGGACGGACAA
Asic4	ENSMUST00000037708	CGCGGTGGTGGTACGACATGATGAAAGGAATGGGTTGTGGTGAGCAGTGGTGCCCACTGAAGTTGCAGCTCAGAGATTAGAGATGAGTTGGAAGCGCAACTAGGACGGACAA
Asic4	ENSMUST00000037708	CGCGGTGGTGGTACGACATGATTGGAGGTGTAGGGAGTAAACTTGAGCCGATCCCAGGAGACCTCATAGATATGTGGAGGGATTGAAGGATAAGCGCAACTAGGACGGACAA
Asic4	ENSMUST00000037708	CGCGGTGGTGGTACGACATGATGTGGAGGGATTGAAGGATAAGGAATAGGAGATGTGTGGGGTCAGCGTAGAGAGATTAGAGATGAGTTGGAAGCGCAACTAGGACGGACAA
Asic4	ENSMUST00000037708	CGCGGTGGTGGTACGACATGATTGGAGGTGTAGGGAGTAAATCTGAGGATCTGCATTAAAGGTGTAACACTAGAGATTAGAGATGAGTTGGAAGCGCAACTAGGACGGACAA
Asic4	ENSMUST00000037708	CGCGGTGGTGGTACGACATGATGAAAGGAATGGGTTGTGGTAAGCGGTTGATGTTGCAGAGGGTGACAGCCATGTGGAGGGATTGAAGGATAAGCGCAACTAGGACGGACAA
Asic4	ENSMUST00000037708	CGCGGTGGTGGTACGACATGATTGGAGGTGTAGGGAGTAAATGCCCTACTGGGCAGTGAACTCTGAGGATCATGAAAGGAATGGGTTGTGGTAGCGCAACTAGGACGGACAA
Asic4	ENSMUST00000037708	CGCGGTGGTGGTACGACATGATGAAAGGAATGGGTTGTGGTCACTATAGGCTGAGTAGCCCTGAAGCTCAGAGAGATTAGAGATGAGTTGGAAGCGCAACTAGGACGGACAA
Asic4	ENSMUST00000037708	CGCGGTGGTGGTACGACATGATGTGGAGGGATTGAAGGATAGTAGTCAAGGATCTCCAGCAAGGTGAGGATATTGGAGGTGTAGGGAGTAAAAGCGCAACTAGGACGGACAA
Asic4	ENSMUST00000037708	CGCGGTGGTGGTACGACATGAGAGATTAGAGATGAGTTGGATGGTCTCCAGCCCTTCCTGGATACCTGCCTATGTGGAGGGATTGAAGGATAAGCGCAACTAGGACGGACAA
Asic4	ENSMUST00000037708	CGCGGTGGTGGTACGACATGAGAGATTAGAGATGAGTTGGAAGGCCCAGTTTCATGGGTACTTTCCCCACAATTGGAGGTGTAGGGAGTAAAAGCGCAACTAGGACGGACAA
Asic4	ENSMUST00000037708	CGCGGTGGTGGTACGACATGATGAAAGGAATGGGTTGTGGTTACAGAGGGGCTCTGCCAGGGTTCCACCTTATGTGGAGGGATTGAAGGATAAGCGCAACTAGGACGGACAA
Asic4	ENSMUST00000037708	CGCGGTGGTGGTACGACATGATTGGAGGTGTAGGGAGTAAACAGTGTGTGGTCGGCACATTCAATGTAGATATGAAAGGAATGGGTTGTGGTAGCGCAACTAGGACGGACAA
Asic4	ENSMUST00000037708	CGCGGTGGTGGTACGACATGATGAAAGGAATGGGTTGTGGTTCTCTTTGCCGTAACGAGTCAGGTTGCAGGAGAGATTAGAGATGAGTTGGAAGCGCAACTAGGACGGACAA
Asic4	ENSMUST00000037708	CGCGGTGGTGGTACGACATGATTGGAGGTGTAGGGAGTAAAAGGTCTTTCCACCCACTCCCCATGAAGGGAATGTGGAGGGATTGAAGGATAAGCGCAACTAGGACGGACAA
Asic4	ENSMUST00000037708	CGCGGTGGTGGTACGACATGATGTGGAGGGATTGAAGGATAAAAAAGACATCCAGGACCAAGAAGTTCTCCAGAGATTAGAGATGAGTTGGAAGCGCAACTAGGACGGACAA
Asic4	ENSMUST00000037708	CGCGGTGGTGGTACGACATGAGAGATTAGAGATGAGTTGGATGCCCCAGACCTTCTGTCCCAGGAATAGGAATTGGAGGTGTAGGGAGTAAAAGCGCAACTAGGACGGACAA
Asic4	ENSMUST00000037708	CGCGGTGGTGGTACGACATGATGAAAGGAATGGGTTGTGGTACCCACTCCCCATGAAGGGAACTTGTGGTGATGTGGAGGGATTGAAGGATAAGCGCAACTAGGACGGACAA
Asic4	ENSMUST00000037708	CGCGGTGGTGGTACGACATGATTGGAGGTGTAGGGAGTAAAAAGGACCCTTGTGCAAGGCAGCTGAGCCTGATGAAAGGAATGGGTTGTGGTAGCGCAACTAGGACGGACAA
Asic4	ENSMUST00000037708	CGCGGTGGTGGTACGACATGATGAAAGGAATGGGTTGTGGTCCTCCTCAGCAAATTTGATTTTGCACACAAAGAGATTAGAGATGAGTTGGAAGCGCAACTAGGACGGACAA
Asic4	ENSMUST00000037708	CGCGGTGGTGGTACGACATGATTGGAGGTGTAGGGAGTAAAATTCCTCCTGCTGGATGTCTAGCATGATCTATGTGGAGGGATTGAAGGATAAGCGCAACTAGGACGGACAA
Asic4	ENSMUST00000037708	CGCGGTGGTGGTACGACATGAGAGATTAGAGATGAGTTGGAACAGGCCATAGGCGGCTTGCTGTTCCATGGATGTGGAGGGATTGAAGGATAAGCGCAACTAGGACGGACAA
Asic4	ENSMUST00000037708	CGCGGTGGTGGTACGACATGAGAGATTAGAGATGAGTTGGATCATGGGTACTTTCCCCACACAGCACTGTTATTGGAGGTGTAGGGAGTAAAAGCGCAACTAGGACGGACAA
Asic4	ENSMUST00000037708	CGCGGTGGTGGTACGACATGATGAAAGGAATGGGTTGTGGTGTTGCAGCTCTTGAGCATGTCAGCAAGCTGATGTGGAGGGATTGAAGGATAAGCGCAACTAGGACGGACAA
Asic4	ENSMUST00000037708	CGCGGTGGTGGTACGACATGATTGGAGGTGTAGGGAGTAAAATCTGCACCCGGATCCCTGCCTCGAATGACATGAAAGGAATGGGTTGTGGTAGCGCAACTAGGACGGACAA
Asic4	ENSMUST00000037708	CGCGGTGGTGGTACGACATGATGAAAGGAATGGGTTGTGGTCAATGTAGATATTTGGTGGGCAGATGGTCTAGAGATTAGAGATGAGTTGGAAGCGCAACTAGGACGGACAA
Asic4	ENSMUST00000037708	CGCGGTGGTGGTACGACATGATGTGGAGGGATTGAAGGATAGCGGCTGCTCTTCTAAACTCAGGGCAACCAATTGGAGGTGTAGGGAGTAAAAGCGCAACTAGGACGGACAA
Asic4	ENSMUST00000037708	CGCGGTGGTGGTACGACATGATGTGGAGGGATTGAAGGATAAGCATGATCTCCAGGCCACTACCCATGCCGAGAGATTAGAGATGAGTTGGAAGCGCAACTAGGACGGACAA
Asic4	ENSMUST00000037708	CGCGGTGGTGGTACGACATGAGAGATTAGAGATGAGTTGGACAGGCAGACACACTATAGGCTGAGTAGCCCATTGGAGGTGTAGGGAGTAAAAGCGCAACTAGGACGGACAA
Asic4	ENSMUST00000037708	CGCGGTGGTGGTACGACATGATGAAAGGAATGGGTTGTGGTTTCTAAACTCAGGGCAACCAGGAGGAGGACATGTGGAGGGATTGAAGGATAAGCGCAACTAGGACGGACAA
Asic4	ENSMUST00000037708	CGCGGTGGTGGTACGACATGATTGGAGGTGTAGGGAGTAAAGATCCCTGCCTCGAATGACGTCTCGTTTGTATGAAAGGAATGGGTTGTGGTAGCGCAACTAGGACGGACAA
B4galnt2	ENSMUST00000038343	CGCGGTGGTGGTACGACATGAAGGTTAGGTTGAGAATAGGATTTGGGGAAGAGCCAGATGTCACTGTAGGTATTGGAGGTGTAGGGAGTAAAAGCGCAACTAGGACGGACAA
B4galnt2	ENSMUST00000038343	CGCGGTGGTGGTACGACATGAAGGTTAGGTTGAGAATAGGACAAATGTCTTGAGGAGCCATGGAAACCTGAAAGTGTGGGATTGATGAGATAAGCGCAACTAGGACGGACAA
B4galnt2	ENSMUST00000038343	CGCGGTGGTGGTACGACATGATGTGGTTTGGAGATGATAGACACTGACGACTCGTATTCCATACTTACTGTAAGGTTAGGTTGAGAATAGGAAGCGCAACTAGGACGGACAA
B4galnt2	ENSMUST00000038343	CGCGGTGGTGGTACGACATGAAGTGTGGGATTGATGAGATAGTGAGCCAAGAAGAAGTTCACCACGCCGCTATTGGAGGTGTAGGGAGTAAAAGCGCAACTAGGACGGACAA
B4galnt2	ENSMUST00000038343	CGCGGTGGTGGTACGACATGATGTGGTTTGGAGATGATAGAGAAGAGAAAGTCATCGTCCACCCAGAGGACATTGGAGGTGTAGGGAGTAAAAGCGCAACTAGGACGGACAA
B4galnt2	ENSMUST00000038343	CGCGGTGGTGGTACGACATGATGTGGTTTGGAGATGATAGAAGATGGCCAGGTTCCTCCCAGCAAACCAGCAAGTGTGGGATTGATGAGATAAGCGCAACTAGGACGGACAA
B4galnt2	ENSMUST00000038343	CGCGGTGGTGGTACGACATGATTGGAGGTGTAGGGAGTAAAGTCTGCTTTTGGTACCCTCCAATGTCCAATAAGGTTAGGTTGAGAATAGGAAGCGCAACTAGGACGGACAA
B4galnt2	ENSMUST00000038343	CGCGGTGGTGGTACGACATGAAGGTTAGGTTGAGAATAGGAAAGCTTCAGCACTGGGTCAACCCTTGCAGGAAGTGTGGGATTGATGAGATAAGCGCAACTAGGACGGACAA
B4galnt2	ENSMUST00000038343	CGCGGTGGTGGTACGACATGATGTGGTTTGGAGATGATAGACGATGTCTGGTGGAAATGGTCAGCTGCCTCAAGGTTAGGTTGAGAATAGGAAGCGCAACTAGGACGGACAA
B4galnt2	ENSMUST00000038343	CGCGGTGGTGGTACGACATGATTGGAGGTGTAGGGAGTAAAATCACCTCCACACCATGGACTGGGTATCCGAAGTGTGGGATTGATGAGATAAGCGCAACTAGGACGGACAA
B4galnt2	ENSMUST00000038343	CGCGGTGGTGGTACGACATGATTGGAGGTGTAGGGAGTAAATTTTTTTGTTGCCCGCCGCTAATCTGTTTAATGTGGTTTGGAGATGATAGAAGCGCAACTAGGACGGACAA
B4galnt2	ENSMUST00000038343	CGCGGTGGTGGTACGACATGAAGTGTGGGATTGATGAGATAGCAACCTTGAATTGGATCACAGAATTGGTGATGTGGTTTGGAGATGATAGAAGCGCAACTAGGACGGACAA
B4galnt2	ENSMUST00000038343	CGCGGTGGTGGTACGACATGAAGGTTAGGTTGAGAATAGGATCGGTTTTCTCCAGGACATCCACCAGTACCATTGGAGGTGTAGGGAGTAAAAGCGCAACTAGGACGGACAA
B4galnt2	ENSMUST00000038343	CGCGGTGGTGGTACGACATGAAGGTTAGGTTGAGAATAGGATAGACTGGAGCATCTGGCCCTTCATACTGGAAGTGTGGGATTGATGAGATAAGCGCAACTAGGACGGACAA
B4galnt2	ENSMUST00000038343	CGCGGTGGTGGTACGACATGATGTGGTTTGGAGATGATAGAGATCTTCCTCTCAGGTCCAGGGTCATACAAAAGGTTAGGTTGAGAATAGGAAGCGCAACTAGGACGGACAA
B4galnt2	ENSMUST00000038343	CGCGGTGGTGGTACGACATGATTGGAGGTGTAGGGAGTAAATCATCTGGCACATCAGCAAGGGTGTTCAGTAAGTGTGGGATTGATGAGATAAGCGCAACTAGGACGGACAA
B4galnt2	ENSMUST00000038343	CGCGGTGGTGGTACGACATGATGTGGTTTGGAGATGATAGAGACGGAGAAAAGTCTTCGTGGCAATGGTCAATTGGAGGTGTAGGGAGTAAAAGCGCAACTAGGACGGACAA
B4galnt2	ENSMUST00000038343	CGCGGTGGTGGTACGACATGAAGTGTGGGATTGATGAGATACTGGCATTCACAGCTGGAAGGTCCTTCTGGATGTGGTTTGGAGATGATAGAAGCGCAACTAGGACGGACAA
B4galnt2	ENSMUST00000038343	CGCGGTGGTGGTACGACATGATTGGAGGTGTAGGGAGTAAAGGTACCCTCCAATGTCCAATCCTACTATTTAAGGTTAGGTTGAGAATAGGAAGCGCAACTAGGACGGACAA
B4galnt2	ENSMUST00000038343	CGCGGTGGTGGTACGACATGAAGTGTGGGATTGATGAGATAAGTCTTCGTGGCAATGGTCACCAGGTTTCTAAGGTTAGGTTGAGAATAGGAAGCGCAACTAGGACGGACAA
B4galnt2	ENSMUST00000038343	CGCGGTGGTGGTACGACATGAAGGTTAGGTTGAGAATAGGACATACAGCAGCCTGAACTGGTAAGTATTCCATGTGGTTTGGAGATGATAGAAGCGCAACTAGGACGGACAA
B4galnt2	ENSMUST00000038343	CGCGGTGGTGGTACGACATGATTGGAGGTGTAGGGAGTAAACGTCAAGGGCCTGGAATGATCCCCACCTCTAAGTGTGGGATTGATGAGATAAGCGCAACTAGGACGGACAA
B4galnt2	ENSMUST00000038343	CGCGGTGGTGGTACGACATGATTGGAGGTGTAGGGAGTAAACTGTTGTAAGGGACACCTTTCTCACCATAAATGTGGTTTGGAGATGATAGAAGCGCAACTAGGACGGACAA
B4galnt2	ENSMUST00000038343	CGCGGTGGTGGTACGACATGAAGTGTGGGATTGATGAGATACATTAATTTCCAGGGGCTCCTTGCTGTCATATGTGGTTTGGAGATGATAGAAGCGCAACTAGGACGGACAA
B4galnt2	ENSMUST00000038343	CGCGGTGGTGGTACGACATGATTGGAGGTGTAGGGAGTAAAGGTGTACGTCACATGCTGAAGGATGAAATTAAGGTTAGGTTGAGAATAGGAAGCGCAACTAGGACGGACAA
B4galnt2	ENSMUST00000038343	CGCGGTGGTGGTACGACATGAAGGTTAGGTTGAGAATAGGAGGATGAAATTCAGGACCTTCCGATGTCTGGAAGTGTGGGATTGATGAGATAAGCGCAACTAGGACGGACAA
B4galnt2	ENSMUST00000038343	CGCGGTGGTGGTACGACATGAAGGTTAGGTTGAGAATAGGAGCAGTAGAGATGGTTCTTGAAGTACTGGAGATGTGGTTTGGAGATGATAGAAGCGCAACTAGGACGGACAA
B4galnt2	ENSMUST00000038343	CGCGGTGGTGGTACGACATGATTGGAGGTGTAGGGAGTAAATGGGTACAGTCTGTTGTTTGATAGTCACTGAAGTGTGGGATTGATGAGATAAGCGCAACTAGGACGGACAA
B4galnt2	ENSMUST00000038343	CGCGGTGGTGGTACGACATGATTGGAGGTGTAGGGAGTAAACCCAGAGGACATATTTAGTAGTCACCTGTGATGTGGTTTGGAGATGATAGAAGCGCAACTAGGACGGACAA
B4galnt2	ENSMUST00000038343	CGCGGTGGTGGTACGACATGATGTGGTTTGGAGATGATAGAAGTCATCGCAGCTCGCTCCAGCCACTTCTGAAGTGTGGGATTGATGAGATAAGCGCAACTAGGACGGACAA
B4galnt2	ENSMUST00000038343	CGCGGTGGTGGTACGACATGATTGGAGGTGTAGGGAGTAAAGGACACCTTTCTCACCATAAACGCAACAGTAAGGTTAGGTTGAGAATAGGAAGCGCAACTAGGACGGACAA
B4galnt2	ENSMUST00000038343	CGCGGTGGTGGTACGACATGAAGTGTGGGATTGATGAGATATCAATAAAGAACTCTCCGTGGGCCACTCGTAAGGTTAGGTTGAGAATAGGAAGCGCAACTAGGACGGACAA
B4galnt2	ENSMUST00000038343	CGCGGTGGTGGTACGACATGATGTGGTTTGGAGATGATAGAAAGAAGTTCACCACGCCGCTGGTCAACGTGAAGGTTAGGTTGAGAATAGGAAGCGCAACTAGGACGGACAA
B4galnt2	ENSMUST00000038343	CGCGGTGGTGGTACGACATGATTGGAGGTGTAGGGAGTAAACCAGGTTTCTGATCTTCCTCTCAGGTCCAGAAGTGTGGGATTGATGAGATAAGCGCAACTAGGACGGACAA
B4galnt2	ENSMUST00000038343	CGCGGTGGTGGTACGACATGATGTGGTTTGGAGATGATAGAATCCTACTATTTTTTTTGTTGCCCGCCGCTATTGGAGGTGTAGGGAGTAAAAGCGCAACTAGGACGGACAA
B4galnt2	ENSMUST00000038343	CGCGGTGGTGGTACGACATGATGTGGTTTGGAGATGATAGACATGGTGTAGTACTCCACGTAGTCATCATTAAGTGTGGGATTGATGAGATAAGCGCAACTAGGACGGACAA
B4galnt2	ENSMUST00000038343	CGCGGTGGTGGTACGACATGAAGGTTAGGTTGAGAATAGGATACTCTGAAGCAGGATCTTAAGCTTGTGGGATTGGAGGTGTAGGGAGTAAAAGCGCAACTAGGACGGACAA
B4galnt2	ENSMUST00000038343	CGCGGTGGTGGTACGACATGAAGTGTGGGATTGATGAGATAGGAAACCTGAAGCTGGCAAAAGACACGCTGAAGGTTAGGTTGAGAATAGGAAGCGCAACTAGGACGGACAA
B4galnt2	ENSMUST00000038343	CGCGGTGGTGGTACGACATGAAGGTTAGGTTGAGAATAGGATCATCGTCCACCCAGAGGACATATTTAGTAATGTGGTTTGGAGATGATAGAAGCGCAACTAGGACGGACAA
B4galnt2	ENSMUST00000038343	CGCGGTGGTGGTACGACATGAAGTGTGGGATTGATGAGATAGAAACTTGGCCACTGACGACTCGTATTCCAATTGGAGGTGTAGGGAGTAAAAGCGCAACTAGGACGGACAA
B4galnt2	ENSMUST00000038343	CGCGGTGGTGGTACGACATGATGTGGTTTGGAGATGATAGAAACCAGCCCTTCCCAAAGGGCATGGTGTAGATTGGAGGTGTAGGGAGTAAAAGCGCAACTAGGACGGACAA
B4galnt2	ENSMUST00000038343	CGCGGTGGTGGTACGACATGATGTGGTTTGGAGATGATAGAAGACACGCTGGAAGTCATCGCAGCTCGCTCAAGTGTGGGATTGATGAGATAAGCGCAACTAGGACGGACAA
B4galnt2	ENSMUST00000038343	CGCGGTGGTGGTACGACATGAAGGTTAGGTTGAGAATAGGACCGGGAAAGCCGTCAAGGGCCTGGAATGATATTGGAGGTGTAGGGAGTAAAAGCGCAACTAGGACGGACAA
B4galnt2	ENSMUST00000038343	CGCGGTGGTGGTACGACATGAAGGTTAGGTTGAGAATAGGAGCTCAAATTCTGCCTGTCTTCTGGCATTCAAAGTGTGGGATTGATGAGATAAGCGCAACTAGGACGGACAA
B4galnt2	ENSMUST00000038343	CGCGGTGGTGGTACGACATGAAGGTTAGGTTGAGAATAGGAAAGCTTTCAGGATGACCTCATAGACTGGAGATGTGGTTTGGAGATGATAGAAGCGCAACTAGGACGGACAA
B4galnt2	ENSMUST00000038343	CGCGGTGGTGGTACGACATGATTGGAGGTGTAGGGAGTAAAATTTGTCATAAGTCTTCTCCAAGGCAGCCAAAGTGTGGGATTGATGAGATAAGCGCAACTAGGACGGACAA
B4galnt2	ENSMUST00000038343	CGCGGTGGTGGTACGACATGATTGGAGGTGTAGGGAGTAAATCAATCTTGGTCTTGTCGCTGAAGAGAAAGATGTGGTTTGGAGATGATAGAAGCGCAACTAGGACGGACAA
B4galnt2	ENSMUST00000038343	CGCGGTGGTGGTACGACATGAAGTGTGGGATTGATGAGATACTGAACCTCATCATCTGGCACATCAGCAAGATGTGGTTTGGAGATGATAGAAGCGCAACTAGGACGGACAA
B4galnt2	ENSMUST00000038343	CGCGGTGGTGGTACGACATGAAGGTTAGGTTGAGAATAGGATGGGTCAACCCTTGCAGGCTCTGGAAACTTATTGGAGGTGTAGGGAGTAAAAGCGCAACTAGGACGGACAA
B4galnt2	ENSMUST00000038343	CGCGGTGGTGGTACGACATGAAGGTTAGGTTGAGAATAGGAGGTCATACAACTTGGGTACAGTCTGTTGTTAAGTGTGGGATTGATGAGATAAGCGCAACTAGGACGGACAA
B4galnt2	ENSMUST00000038343	CGCGGTGGTGGTACGACATGATGTGGTTTGGAGATGATAGAATTGGATCACAGAATTGGTGTTGGCCCGGTAAGGTTAGGTTGAGAATAGGAAGCGCAACTAGGACGGACAA
B4galnt2	ENSMUST00000038343	CGCGGTGGTGGTACGACATGATTGGAGGTGTAGGGAGTAAATACTTACTGTGTCCACCTTGTGGAGATAGTAAGTGTGGGATTGATGAGATAAGCGCAACTAGGACGGACAA
B4galnt2	ENSMUST00000038343	CGCGGTGGTGGTACGACATGATGTGGTTTGGAGATGATAGACTGGAATGATCCCCACCTCTGGTGAAGACAATTGGAGGTGTAGGGAGTAAAAGCGCAACTAGGACGGACAA
B4galnt2	ENSMUST00000038343	CGCGGTGGTGGTACGACATGATGTGGTTTGGAGATGATAGACAGGGGCTCCTTGCTGTCATCAGCTACAATAAGTGTGGGATTGATGAGATAAGCGCAACTAGGACGGACAA
B4galnt2	ENSMUST00000038343	CGCGGTGGTGGTACGACATGATTGGAGGTGTAGGGAGTAAAGCCACTCGTTGCAAGATGGGATCAAAACCAAAGGTTAGGTTGAGAATAGGAAGCGCAACTAGGACGGACAA
B4galnt2	ENSMUST00000038343	CGCGGTGGTGGTACGACATGAAGTGTGGGATTGATGAGATAGGCGAGGCAGCCCTTCTCTCCTCTGAAAGTAAGGTTAGGTTGAGAATAGGAAGCGCAACTAGGACGGACAA
B4galnt2	ENSMUST00000038343	CGCGGTGGTGGTACGACATGAAGGTTAGGTTGAGAATAGGACAGGATCTTAAGCTTGTGGGGACGGAGAAAATGTGGTTTGGAGATGATAGAAGCGCAACTAGGACGGACAA
B4galnt2	ENSMUST00000038343	CGCGGTGGTGGTACGACATGATTGGAGGTGTAGGGAGTAAATTACACCCGGGCAAGAGCCCACCAACAGTCAAGTGTGGGATTGATGAGATAAGCGCAACTAGGACGGACAA
B4galnt2	ENSMUST00000038343	CGCGGTGGTGGTACGACATGATGTGGTTTGGAGATGATAGACACTGTAGGTAAAGAGTTTCCTCAGATGCTATTGGAGGTGTAGGGAGTAAAAGCGCAACTAGGACGGACAA
B4galnt2	ENSMUST00000038343	CGCGGTGGTGGTACGACATGAAGTGTGGGATTGATGAGATAATAGTCACTGGAAACTTGGCCACTGACGACATGTGGTTTGGAGATGATAGAAGCGCAACTAGGACGGACAA
B4galnt2	ENSMUST00000038343	CGCGGTGGTGGTACGACATGATTGGAGGTGTAGGGAGTAAACATCAGCAAGGGTGTTCAGTGTCCCCAGAGAAGGTTAGGTTGAGAATAGGAAGCGCAACTAGGACGGACAA
B4galnt2	ENSMUST00000038343	CGCGGTGGTGGTACGACATGAAGTGTGGGATTGATGAGATAACATGCTGAAGGATGAAATTCAGGACCTTCAAGGTTAGGTTGAGAATAGGAAGCGCAACTAGGACGGACAA
B4galnt2	ENSMUST00000038343	CGCGGTGGTGGTACGACATGATGTGGTTTGGAGATGATAGACACCATGGACTGGGTATCCGAAGGGGAGATAAGGTTAGGTTGAGAATAGGAAGCGCAACTAGGACGGACAA
B4galnt2	ENSMUST00000038343	CGCGGTGGTGGTACGACATGAAGTGTGGGATTGATGAGATAGATGACCTCATAGACTGGAGCATCTGGCCCATTGGAGGTGTAGGGAGTAAAAGCGCAACTAGGACGGACAA
B4galnt2	ENSMUST00000038343	CGCGGTGGTGGTACGACATGATTGGAGGTGTAGGGAGTAAATTGCTGTCATCAGCTACAATCACGGTGATGATGTGGTTTGGAGATGATAGAAGCGCAACTAGGACGGACAA
B4galnt2	ENSMUST00000038343	CGCGGTGGTGGTACGACATGAAGTGTGGGATTGATGAGATATGGAAATGGTCAGCTGCCTCTGGCCTCTGCATGTGGTTTGGAGATGATAGAAGCGCAACTAGGACGGACAA
B4galnt2	ENSMUST00000038343	CGCGGTGGTGGTACGACATGATTGGAGGTGTAGGGAGTAAATGAGAATTGTATGCAGGGGCATCACCTCCAAAGGTTAGGTTGAGAATAGGAAGCGCAACTAGGACGGACAA
B4galnt2	ENSMUST00000038343	CGCGGTGGTGGTACGACATGAAGTGTGGGATTGATGAGATAACTCTGTGCTGGTGTACGTCACATGCTGAAAAGGTTAGGTTGAGAATAGGAAGCGCAACTAGGACGGACAA
B4galnt2	ENSMUST00000038343	CGCGGTGGTGGTACGACATGATGTGGTTTGGAGATGATAGACTGGAAACTTTGGCTTGAAGGTGCTGAAGTAAGGTTAGGTTGAGAATAGGAAGCGCAACTAGGACGGACAA
B4galnt2	ENSMUST00000038343	CGCGGTGGTGGTACGACATGAAGTGTGGGATTGATGAGATATGCCTGTCTTCTGGCATTCACAGCTGGAAGATTGGAGGTGTAGGGAGTAAAAGCGCAACTAGGACGGACAA
B4galnt2	ENSMUST00000038343	CGCGGTGGTGGTACGACATGATTGGAGGTGTAGGGAGTAAATGGAGATAGTACTCTGTGCTGGTGTACGTCATGTGGTTTGGAGATGATAGAAGCGCAACTAGGACGGACAA
B4galnt2	ENSMUST00000038343	CGCGGTGGTGGTACGACATGAAGTGTGGGATTGATGAGATAAGCTTGTGGGGACGGAGAAAAGTCTTCGTGATGTGGTTTGGAGATGATAGAAGCGCAACTAGGACGGACAA
B4galnt2	ENSMUST00000038343	CGCGGTGGTGGTACGACATGATTGGAGGTGTAGGGAGTAAAGGTTCTTGAAGTACTGGAGTGCAACCTTGAAAGGTTAGGTTGAGAATAGGAAGCGCAACTAGGACGGACAA
B4galnt2	ENSMUST00000038343	CGCGGTGGTGGTACGACATGAAGTGTGGGATTGATGAGATATGGTCTTGGTACTTTTTAAGTGGAGCAGTAAAGGTTAGGTTGAGAATAGGAAGCGCAACTAGGACGGACAA
B4galnt2	ENSMUST00000038343	CGCGGTGGTGGTACGACATGAAGGTTAGGTTGAGAATAGGAGTTGTTCCGTGTGAGCCAAGAAGAAGTTCAATGTGGTTTGGAGATGATAGAAGCGCAACTAGGACGGACAA
B4galnt2	ENSMUST00000038343	CGCGGTGGTGGTACGACATGAAGTGTGGGATTGATGAGATAATGCAGGGGCATCACCTCCACACCATGGACATTGGAGGTGTAGGGAGTAAAAGCGCAACTAGGACGGACAA
B4galnt2	ENSMUST00000038343	CGCGGTGGTGGTACGACATGATTGGAGGTGTAGGGAGTAAAAGCTGGCAAAAGACACGCTGGAAGTCATCGATGTGGTTTGGAGATGATAGAAGCGCAACTAGGACGGACAA
B4galnt2	ENSMUST00000038343	CGCGGTGGTGGTACGACATGAAGTGTGGGATTGATGAGATAACTCTCCGTGGGCCACTCGTTGCAAGATGGATGTGGTTTGGAGATGATAGAAGCGCAACTAGGACGGACAA
B4galnt2	ENSMUST00000038343	CGCGGTGGTGGTACGACATGAAGGTTAGGTTGAGAATAGGACACGGTGATGTCTGGGTAATATTTTCGAATATTGGAGGTGTAGGGAGTAAAAGCGCAACTAGGACGGACAA
B4galnt2	ENSMUST00000038343	CGCGGTGGTGGTACGACATGAAGGTTAGGTTGAGAATAGGAACGCAACAGTGGCAAGTCCTACCATGAGGAAAGTGTGGGATTGATGAGATAAGCGCAACTAGGACGGACAA
B4galnt2	ENSMUST00000038343	CGCGGTGGTGGTACGACATGATGTGGTTTGGAGATGATAGACTGTTGTTTGATAGTCACTGGAAACTTGGCAAGGTTAGGTTGAGAATAGGAAGCGCAACTAGGACGGACAA
B4galnt2	ENSMUST00000038343	CGCGGTGGTGGTACGACATGAAGTGTGGGATTGATGAGATATGGGTATCCGAAGGGGAGATTGGGTGGAGCATTGGAGGTGTAGGGAGTAAAAGCGCAACTAGGACGGACAA
B4galnt2	ENSMUST00000038343	CGCGGTGGTGGTACGACATGATGTGGTTTGGAGATGATAGACAGCTACAATCACGGTGATGTCTGGGTAATATTGGAGGTGTAGGGAGTAAAAGCGCAACTAGGACGGACAA
B4galnt2	ENSMUST00000038343	CGCGGTGGTGGTACGACATGAAGTGTGGGATTGATGAGATAACCATGAGGACAAATGTCTTGAGGAGCCATATGTGGTTTGGAGATGATAGAAGCGCAACTAGGACGGACAA
B4galnt2	ENSMUST00000038343	CGCGGTGGTGGTACGACATGATTGGAGGTGTAGGGAGTAAAATATTTAGTAGTCACCTGTGAGATGGCCAGAAGGTTAGGTTGAGAATAGGAAGCGCAACTAGGACGGACAA
B4galnt2	ENSMUST00000038343	CGCGGTGGTGGTACGACATGAAGGTTAGGTTGAGAATAGGATCGTATTCCATACTTACTGTGTCCACCTTGAAGTGTGGGATTGATGAGATAAGCGCAACTAGGACGGACAA
B4galnt2	ENSMUST00000038343	CGCGGTGGTGGTACGACATGAAGGTTAGGTTGAGAATAGGATTCATACTGGAGGCCTGGGATGAGAATTGTATGTGGTTTGGAGATGATAGAAGCGCAACTAGGACGGACAA
B4galnt2	ENSMUST00000038343	CGCGGTGGTGGTACGACATGATTGGAGGTGTAGGGAGTAAAGTGCTGAAGTCTGTTGTAAGGGACACCTTTAAGTGTGGGATTGATGAGATAAGCGCAACTAGGACGGACAA
B4galnt2	ENSMUST00000038343	CGCGGTGGTGGTACGACATGATGTGGTTTGGAGATGATAGACAGGACCTTCCGATGTCTGGTGGAAATGGTATTGGAGGTGTAGGGAGTAAAAGCGCAACTAGGACGGACAA
B4galnt2	ENSMUST00000038343	CGCGGTGGTGGTACGACATGAAGTGTGGGATTGATGAGATACACACTGATTTTTGGGGAAGAGCCAGATGTATGTGGTTTGGAGATGATAGAAGCGCAACTAGGACGGACAA
B4galnt2	ENSMUST00000038343	CGCGGTGGTGGTACGACATGATTGGAGGTGTAGGGAGTAAAGCTCCCATTCTTGGTCTGTTCATACAGCAGAAGGTTAGGTTGAGAATAGGAAGCGCAACTAGGACGGACAA
B4galnt2	ENSMUST00000038343	CGCGGTGGTGGTACGACATGAAGTGTGGGATTGATGAGATACCAGGACATCCACCAGTACCTCAATCTTGGAAGGTTAGGTTGAGAATAGGAAGCGCAACTAGGACGGACAA
B4galnt3	ENSMUST00000212457	CGCGGTGGTGGTACGACATGAAGGTTAGGTTGAGAATAGGAGGGAGGCTGATAAACTCACTGGCTTGGAAAAAGGGTGTGTTTGTAAAGGGTAGCGCAACTAGGACGGACAA
B4galnt3	ENSMUST00000212457	CGCGGTGGTGGTACGACATGATGTGGTTTGGAGATGATAGATGCAGATAGCCAAATATGCGGAGGCCATAGAAGGGTGTGTTTGTAAAGGGTAGCGCAACTAGGACGGACAA
B4galnt3	ENSMUST00000212457	CGCGGTGGTGGTACGACATGAAGGGTGTGTTTGTAAAGGGTGGACACAGCCAGCTTCCTCAGAGTTGTGCGAAGTTGAGGTGGGAGAGTATTAGCGCAACTAGGACGGACAA
B4galnt3	ENSMUST00000212457	CGCGGTGGTGGTACGACATGATGTGGTTTGGAGATGATAGAACAAAACGGAGGCCCTGGTAGCGCTGTAGCAAGGTTAGGTTGAGAATAGGAAGCGCAACTAGGACGGACAA
B4galnt3	ENSMUST00000212457	CGCGGTGGTGGTACGACATGAAGTTGAGGTGGGAGAGTATTAGGAGAAACCTTGGGGCCAGCAGAGCTTGGAAGGTTAGGTTGAGAATAGGAAGCGCAACTAGGACGGACAA
B4galnt3	ENSMUST00000212457	CGCGGTGGTGGTACGACATGAAGTTGAGGTGGGAGAGTATTGGAGTGTTGGAGGAGCCTACATGGCTGGCTATGTGGTTTGGAGATGATAGAAGCGCAACTAGGACGGACAA
B4galnt3	ENSMUST00000212457	CGCGGTGGTGGTACGACATGAAGGGTGTGTTTGTAAAGGGTGGTGGAAATAGTCTTCTGTTTTCTCCCTTGAAGGTTAGGTTGAGAATAGGAAGCGCAACTAGGACGGACAA
B4galnt3	ENSMUST00000212457	CGCGGTGGTGGTACGACATGAAGGGTGTGTTTGTAAAGGGTAGGTCTATGCCAGCCTGCAGTCCAGCAGAGATGTGGTTTGGAGATGATAGAAGCGCAACTAGGACGGACAA
B4galnt3	ENSMUST00000212457	CGCGGTGGTGGTACGACATGAAGTTGAGGTGGGAGAGTATTTACTTCCCAGTAGCCCTCAGGCCACTGTGGAAGGGTGTGTTTGTAAAGGGTAGCGCAACTAGGACGGACAA
B4galnt3	ENSMUST00000212457	CGCGGTGGTGGTACGACATGATGTGGTTTGGAGATGATAGATTCTCAGGAAGACCCGTGTGACCTCCAGGGAAGGTTAGGTTGAGAATAGGAAGCGCAACTAGGACGGACAA
B4galnt3	ENSMUST00000212457	CGCGGTGGTGGTACGACATGAAGGTTAGGTTGAGAATAGGACAGACCCTGCAGGTTCCGAGCTTCTGTGTCAAGTTGAGGTGGGAGAGTATTAGCGCAACTAGGACGGACAA
B4galnt3	ENSMUST00000212457	CGCGGTGGTGGTACGACATGAAGTTGAGGTGGGAGAGTATTCACTCAGCTTCAGGTACTGGTAGCTCCGCAATGTGGTTTGGAGATGATAGAAGCGCAACTAGGACGGACAA
B4galnt3	ENSMUST00000212457	CGCGGTGGTGGTACGACATGAAGGGTGTGTTTGTAAAGGGTGGAATGGAAGTGATGGAAGAAGTTCCTGAGAAGGTTAGGTTGAGAATAGGAAGCGCAACTAGGACGGACAA
B4galnt3	ENSMUST00000212457	CGCGGTGGTGGTACGACATGAAGGGTGTGTTTGTAAAGGGTGCCTGCTTGGAGAATCCTGTCCAGCAGCTCATGTGGTTTGGAGATGATAGAAGCGCAACTAGGACGGACAA
B4galnt3	ENSMUST00000212457	CGCGGTGGTGGTACGACATGAAGGGTGTGTTTGTAAAGGGTGAGTTGTGCGGATGTGGGGGTAGAGTGGGAAAGTTGAGGTGGGAGAGTATTAGCGCAACTAGGACGGACAA
B4galnt3	ENSMUST00000212457	CGCGGTGGTGGTACGACATGATGTGGTTTGGAGATGATAGATTTTCCCATCGGTGAAAGGGTGCAGATAGCAAGGTTAGGTTGAGAATAGGAAGCGCAACTAGGACGGACAA
B4galnt3	ENSMUST00000212457	CGCGGTGGTGGTACGACATGAAGTTGAGGTGGGAGAGTATTCCGGGTCCTCTGGCTGAGCTTTCTCAGGAAAAGGTTAGGTTGAGAATAGGAAGCGCAACTAGGACGGACAA
B4galnt3	ENSMUST00000212457	CGCGGTGGTGGTACGACATGAAGTTGAGGTGGGAGAGTATTTCAAAGTTTCCACTCAGCTTCAGGTACTGGATGTGGTTTGGAGATGATAGAAGCGCAACTAGGACGGACAA
B4galnt3	ENSMUST00000212457	CGCGGTGGTGGTACGACATGAAGGGTGTGTTTGTAAAGGGTTGTTGGATGGAGCTGCCACACCAGTCTTCAAAGGTTAGGTTGAGAATAGGAAGCGCAACTAGGACGGACAA
B4galnt3	ENSMUST00000212457	CGCGGTGGTGGTACGACATGAAGGGTGTGTTTGTAAAGGGTAGAAGGCCATCCTCCAAACCTGGCTGCTCCATGTGGTTTGGAGATGATAGAAGCGCAACTAGGACGGACAA
B4galnt3	ENSMUST00000212457	CGCGGTGGTGGTACGACATGAAGTTGAGGTGGGAGAGTATTACACGTACTCCGAGAGCCGTACCAGGCGTTAAGGGTGTGTTTGTAAAGGGTAGCGCAACTAGGACGGACAA
B4galnt3	ENSMUST00000212457	CGCGGTGGTGGTACGACATGAAGGTTAGGTTGAGAATAGGAAGCTACTGTTCCTACTCCTACTTCGGGCAAATGTGGTTTGGAGATGATAGAAGCGCAACTAGGACGGACAA
B4galnt3	ENSMUST00000212457	CGCGGTGGTGGTACGACATGAAGTTGAGGTGGGAGAGTATTAGTTCCTGAGGGAGAGCCGCTCCACTTCCAAAGGTTAGGTTGAGAATAGGAAGCGCAACTAGGACGGACAA
B4galnt3	ENSMUST00000212457	CGCGGTGGTGGTACGACATGATGTGGTTTGGAGATGATAGATGAAGGATTCCACTTGATTCAGCCACTGGGAAGTTGAGGTGGGAGAGTATTAGCGCAACTAGGACGGACAA
B4galnt3	ENSMUST00000212457	CGCGGTGGTGGTACGACATGAAGGGTGTGTTTGTAAAGGGTCAGGTACTGGTAGCTCCGCAGTCTGGACCTAAGGTTAGGTTGAGAATAGGAAGCGCAACTAGGACGGACAA
B4galnt3	ENSMUST00000212457	CGCGGTGGTGGTACGACATGATGTGGTTTGGAGATGATAGACATTCAGGACATGTCTGTGACGGTTGCGTGAAGGGTGTGTTTGTAAAGGGTAGCGCAACTAGGACGGACAA
B4galnt3	ENSMUST00000212457	CGCGGTGGTGGTACGACATGAAGTTGAGGTGGGAGAGTATTGAGATTCGGATCAACGGCTGGGATGTTCCTAAGGGTGTGTTTGTAAAGGGTAGCGCAACTAGGACGGACAA
B4galnt3	ENSMUST00000212457	CGCGGTGGTGGTACGACATGATGTGGTTTGGAGATGATAGACATCACCATGGGGGCAAAGGCCATCTTGCCAAGGTTAGGTTGAGAATAGGAAGCGCAACTAGGACGGACAA
B4galnt3	ENSMUST00000212457	CGCGGTGGTGGTACGACATGAAGGTTAGGTTGAGAATAGGACCAGTCTTCAAACACATGTAGGTTGGCGTGAAGTTGAGGTGGGAGAGTATTAGCGCAACTAGGACGGACAA
B4galnt3	ENSMUST00000212457	CGCGGTGGTGGTACGACATGATGTGGTTTGGAGATGATAGACAGGTCGATCCAGTCGGTTCTCAGGGCTTGAAGTTGAGGTGGGAGAGTATTAGCGCAACTAGGACGGACAA
B4galnt3	ENSMUST00000212457	CGCGGTGGTGGTACGACATGAAGGTTAGGTTGAGAATAGGAATCCTTCACCAGGTCTATGCCAGCCTGCAGAAGGGTGTGTTTGTAAAGGGTAGCGCAACTAGGACGGACAA
B4galnt3	ENSMUST00000212457	CGCGGTGGTGGTACGACATGAAGGGTGTGTTTGTAAAGGGTAGCCAAGAGCTTCCGCAGGTGGTAGTCAGTATGTGGTTTGGAGATGATAGAAGCGCAACTAGGACGGACAA
B4galnt3	ENSMUST00000212457	CGCGGTGGTGGTACGACATGAAGGGTGTGTTTGTAAAGGGTAGCCTGGTTCTTCACAGGCACAATAAAGTGAAGTTGAGGTGGGAGAGTATTAGCGCAACTAGGACGGACAA
B4galnt3	ENSMUST00000212457	CGCGGTGGTGGTACGACATGATGTGGTTTGGAGATGATAGAGGTGAAAGGGTGCAGATAGCCAAATATGCGAAGGTTAGGTTGAGAATAGGAAGCGCAACTAGGACGGACAA
B4galnt3	ENSMUST00000212457	CGCGGTGGTGGTACGACATGAAGTTGAGGTGGGAGAGTATTTGGCTGAGCTTTCTCAGGAAGACCCGTGTGAAGGTTAGGTTGAGAATAGGAAGCGCAACTAGGACGGACAA
B4galnt3	ENSMUST00000212457	CGCGGTGGTGGTACGACATGATGTGGTTTGGAGATGATAGACAAATCCATTTACTTCCCAGTAGCCCTCAGAAGTTGAGGTGGGAGAGTATTAGCGCAACTAGGACGGACAA
B4galnt3	ENSMUST00000212457	CGCGGTGGTGGTACGACATGAAGGGTGTGTTTGTAAAGGGTAACTGCTGCACCCAGCGAGCCTGGTTCTTCAAGGTTAGGTTGAGAATAGGAAGCGCAACTAGGACGGACAA
B4galnt3	ENSMUST00000212457	CGCGGTGGTGGTACGACATGATGTGGTTTGGAGATGATAGATGTTACAGTTCAGGTCGATCCAGTCGGTTCAAGGGTGTGTTTGTAAAGGGTAGCGCAACTAGGACGGACAA
B4galnt3	ENSMUST00000212457	CGCGGTGGTGGTACGACATGAAGTTGAGGTGGGAGAGTATTCGGTTCCACATGCCTCGCTTGGAATGGAAGAAGGGTGTGTTTGTAAAGGGTAGCGCAACTAGGACGGACAA
B4galnt3	ENSMUST00000212457	CGCGGTGGTGGTACGACATGAAGGTTAGGTTGAGAATAGGAAAATTTCCCAAACTCTCCAGGGGCTGTCCAATGTGGTTTGGAGATGATAGAAGCGCAACTAGGACGGACAA
B4galnt3	ENSMUST00000212457	CGCGGTGGTGGTACGACATGAAGTTGAGGTGGGAGAGTATTCCAGGTCAGACTTGTAGATCCCGAGCAGTCAAGGTTAGGTTGAGAATAGGAAGCGCAACTAGGACGGACAA
B4galnt3	ENSMUST00000212457	CGCGGTGGTGGTACGACATGATGTGGTTTGGAGATGATAGACCTCCACGTGGTCAGTGCCTTCATCATTTTAAGTTGAGGTGGGAGAGTATTAGCGCAACTAGGACGGACAA
B4galnt3	ENSMUST00000212457	CGCGGTGGTGGTACGACATGAAGGGTGTGTTTGTAAAGGGTTCAGACGGGTATAGTCATTGGGATAAACAAAAGGTTAGGTTGAGAATAGGAAGCGCAACTAGGACGGACAA
B4galnt3	ENSMUST00000212457	CGCGGTGGTGGTACGACATGATGTGGTTTGGAGATGATAGAAAGCAGCAGGTTGCCCGATGTGTTACAGTTAAGGGTGTGTTTGTAAAGGGTAGCGCAACTAGGACGGACAA
B4galnt3	ENSMUST00000212457	CGCGGTGGTGGTACGACATGAAGTTGAGGTGGGAGAGTATTTGCTTCTCTGGCTTGTCCATCTTGATATATAAGGGTGTGTTTGTAAAGGGTAGCGCAACTAGGACGGACAA
B4galnt3	ENSMUST00000212457	CGCGGTGGTGGTACGACATGAAGGTTAGGTTGAGAATAGGACAGCAGCTGAAGGCCTGAGACCTGGTCATCATGTGGTTTGGAGATGATAGAAGCGCAACTAGGACGGACAA
B4galnt3	ENSMUST00000212457	CGCGGTGGTGGTACGACATGAAGGTTAGGTTGAGAATAGGAGGGCTGTCCATTCCTTTCCTGTCTTGCCCAAAGTTGAGGTGGGAGAGTATTAGCGCAACTAGGACGGACAA
B4galnt3	ENSMUST00000212457	CGCGGTGGTGGTACGACATGAAGTTGAGGTGGGAGAGTATTATGGCTGGCTGCTGTCTGTGGGATATGGCCATGTGGTTTGGAGATGATAGAAGCGCAACTAGGACGGACAA
B4galnt3	ENSMUST00000212457	CGCGGTGGTGGTACGACATGAAGGTTAGGTTGAGAATAGGAGAAAGAGGCGCTACAGGGCCACTCTGTGAGAAGGGTGTGTTTGTAAAGGGTAGCGCAACTAGGACGGACAA
B4galnt3	ENSMUST00000212457	CGCGGTGGTGGTACGACATGATGTGGTTTGGAGATGATAGAGGTAGCTGGGTTTGTAGGGACAATCGGGCAAAGGGTGTGTTTGTAAAGGGTAGCGCAACTAGGACGGACAA
B4galnt3	ENSMUST00000212457	CGCGGTGGTGGTACGACATGAAGTTGAGGTGGGAGAGTATTGTTGGAGGCTCTATCCTGTCTCCCCTTCTCAAGGGTGTGTTTGTAAAGGGTAGCGCAACTAGGACGGACAA
B4galnt3	ENSMUST00000212457	CGCGGTGGTGGTACGACATGAAGGTTAGGTTGAGAATAGGAAGGTTCCGAGCTTCTGTGTCCTCCCTGCCTATGTGGTTTGGAGATGATAGAAGCGCAACTAGGACGGACAA
B4galnt3	ENSMUST00000212457	CGCGGTGGTGGTACGACATGAAGGTTAGGTTGAGAATAGGACCTGGAAGCTGGACCTGTCCTGGTCATAGGAAGTTGAGGTGGGAGAGTATTAGCGCAACTAGGACGGACAA
B4galnt3	ENSMUST00000212457	CGCGGTGGTGGTACGACATGATGTGGTTTGGAGATGATAGATATGGCCCACCTCATCCATCCTTAGGATGGAAGTTGAGGTGGGAGAGTATTAGCGCAACTAGGACGGACAA
B4galnt3	ENSMUST00000212457	CGCGGTGGTGGTACGACATGAAGGGTGTGTTTGTAAAGGGTCCATCCACCAGGTAGCTGGGTTTGTAGGGAAAGGTTAGGTTGAGAATAGGAAGCGCAACTAGGACGGACAA
B4galnt3	ENSMUST00000212457	CGCGGTGGTGGTACGACATGAAGGGTGTGTTTGTAAAGGGTTTCTCCACATTCACAATGCGCTGCAGCTGGATGTGGTTTGGAGATGATAGAAGCGCAACTAGGACGGACAA
B4galnt3	ENSMUST00000212457	CGCGGTGGTGGTACGACATGAAGTTGAGGTGGGAGAGTATTATGATGGTGAACTTGGCTCCAGGGTCATTCAAGGGTGTGTTTGTAAAGGGTAGCGCAACTAGGACGGACAA
B4galnt3	ENSMUST00000212457	CGCGGTGGTGGTACGACATGAAGGTTAGGTTGAGAATAGGACCACACAGTGCTTCCGGATGGTATCAATGAATGTGGTTTGGAGATGATAGAAGCGCAACTAGGACGGACAA
B4galnt3	ENSMUST00000212457	CGCGGTGGTGGTACGACATGAAGGTTAGGTTGAGAATAGGAGAAGTCGAGGTTCTGAGCGCTGAAGGTCTGAAGTTGAGGTGGGAGAGTATTAGCGCAACTAGGACGGACAA
B4galnt3	ENSMUST00000212457	CGCGGTGGTGGTACGACATGATGTGGTTTGGAGATGATAGACGATGGTTCCAGGAGAAACCTTGGGGCCAGAAGTTGAGGTGGGAGAGTATTAGCGCAACTAGGACGGACAA
B4galnt3	ENSMUST00000212457	CGCGGTGGTGGTACGACATGAAGGTTAGGTTGAGAATAGGATTGGTCCACTTGGGGGACACAGCCAGCTTCAAGGGTGTGTTTGTAAAGGGTAGCGCAACTAGGACGGACAA
B4galnt3	ENSMUST00000212457	CGCGGTGGTGGTACGACATGAAGGGTGTGTTTGTAAAGGGTTGCCTCGCTTGGAATGGAAGTGATGGAAGAATGTGGTTTGGAGATGATAGAAGCGCAACTAGGACGGACAA
B4galnt3	ENSMUST00000212457	CGCGGTGGTGGTACGACATGAAGGGTGTGTTTGTAAAGGGTGCTTGTCCTGGTTGGAAAGGCAGTTGTAGAAAGTTGAGGTGGGAGAGTATTAGCGCAACTAGGACGGACAA
B4galnt3	ENSMUST00000212457	CGCGGTGGTGGTACGACATGAAGGTTAGGTTGAGAATAGGAGTACCAGGCGTTGGCCATCCAGCAGTTCAAATGTGGTTTGGAGATGATAGAAGCGCAACTAGGACGGACAA
B4galnt3	ENSMUST00000212457	CGCGGTGGTGGTACGACATGAAGTTGAGGTGGGAGAGTATTTCACCAGTGGGCCTGGCTCTCTGGATGAGAAAGGTTAGGTTGAGAATAGGAAGCGCAACTAGGACGGACAA
B4galnt3	ENSMUST00000212457	CGCGGTGGTGGTACGACATGATGTGGTTTGGAGATGATAGACCTGCAGTCCAGCAGAGCGCTCAAAGTTTCAAGTTGAGGTGGGAGAGTATTAGCGCAACTAGGACGGACAA
B4galnt3	ENSMUST00000212457	CGCGGTGGTGGTACGACATGAAGGGTGTGTTTGTAAAGGGTCAGAACTCAGCATTGTCATCAGCAGCGATGAAGGTTAGGTTGAGAATAGGAAGCGCAACTAGGACGGACAA
B4galnt3	ENSMUST00000212457	CGCGGTGGTGGTACGACATGATGTGGTTTGGAGATGATAGAAGAAACATTTATTATGGGTCTCCATGTGGCAAGGGTGTGTTTGTAAAGGGTAGCGCAACTAGGACGGACAA
B4galnt3	ENSMUST00000212457	CGCGGTGGTGGTACGACATGAAGGGTGTGTTTGTAAAGGGTGACCTCAAAGTAGTACCTGAGGGAGGCTGAAAGTTGAGGTGGGAGAGTATTAGCGCAACTAGGACGGACAA
B4galnt3	ENSMUST00000212457	CGCGGTGGTGGTACGACATGAAGGTTAGGTTGAGAATAGGAGAGGCCATAGTTGGTCCACTTGGGGGACACATGTGGTTTGGAGATGATAGAAGCGCAACTAGGACGGACAA
B4galnt3	ENSMUST00000212457	CGCGGTGGTGGTACGACATGAAGGTTAGGTTGAGAATAGGAACTTGGGACAGGCTCTCCATATCTCTGATGAAGTTGAGGTGGGAGAGTATTAGCGCAACTAGGACGGACAA
B4galnt3	ENSMUST00000212457	CGCGGTGGTGGTACGACATGAAGTTGAGGTGGGAGAGTATTTGGCTCTCTGGATGAGAGGCAGGTTCCTCCATGTGGTTTGGAGATGATAGAAGCGCAACTAGGACGGACAA
B4galnt3	ENSMUST00000212457	CGCGGTGGTGGTACGACATGAAGGTTAGGTTGAGAATAGGACTATCCTGTCTCCCCTTCTCTGCTCAGCAAAAGGGTGTGTTTGTAAAGGGTAGCGCAACTAGGACGGACAA
B4galnt3	ENSMUST00000212457	CGCGGTGGTGGTACGACATGATGTGGTTTGGAGATGATAGAATCTCCACATCCATGTCCTCACTGCTATAGAAGGGTGTGTTTGTAAAGGGTAGCGCAACTAGGACGGACAA
B4galnt3	ENSMUST00000212457	CGCGGTGGTGGTACGACATGAAGGGTGTGTTTGTAAAGGGTCACTTGATTCAGCCACTGGGACTGCTCAAGAAGTTGAGGTGGGAGAGTATTAGCGCAACTAGGACGGACAA
B4galnt3	ENSMUST00000212457	CGCGGTGGTGGTACGACATGAAGGTTAGGTTGAGAATAGGAGCTTGTCCATCTTGATATATTCCTGGAAGCATGTGGTTTGGAGATGATAGAAGCGCAACTAGGACGGACAA
B4galnt3	ENSMUST00000212457	CGCGGTGGTGGTACGACATGAAGGTTAGGTTGAGAATAGGAGATGTGGGGGTAGAGTGGGAAGTGCAGGTTAAGTTGAGGTGGGAGAGTATTAGCGCAACTAGGACGGACAA
B4galnt3	ENSMUST00000212457	CGCGGTGGTGGTACGACATGATGTGGTTTGGAGATGATAGATCAACGGCTGGGATGTTCCTGCTGGCTAGGAAGTTGAGGTGGGAGAGTATTAGCGCAACTAGGACGGACAA
B4galnt3	ENSMUST00000212457	CGCGGTGGTGGTACGACATGAAGGGTGTGTTTGTAAAGGGTAACTCTCCAGGGGCTGTCCATTCCTTTCCTAAGGTTAGGTTGAGAATAGGAAGCGCAACTAGGACGGACAA
B4galnt3	ENSMUST00000212457	CGCGGTGGTGGTACGACATGATGTGGTTTGGAGATGATAGACACTTCAGGTAGCTACTGTTCCTACTCCTAAAGGGTGTGTTTGTAAAGGGTAGCGCAACTAGGACGGACAA
B4galnt3	ENSMUST00000212457	CGCGGTGGTGGTACGACATGAAGGGTGTGTTTGTAAAGGGTTCACAATGCGCTGCAGCTGGTATCTCCCCCAAGTTGAGGTGGGAGAGTATTAGCGCAACTAGGACGGACAA
B4galnt3	ENSMUST00000212457	CGCGGTGGTGGTACGACATGATGTGGTTTGGAGATGATAGAGTTGGAAAGGCAGTTGTAGAGTTCTGTTTGAAGGTTAGGTTGAGAATAGGAAGCGCAACTAGGACGGACAA
B4galnt3	ENSMUST00000212457	CGCGGTGGTGGTACGACATGAAGGTTAGGTTGAGAATAGGACTTCAGAGCCATCTCCACATCCATGTCCTCAAGTTGAGGTGGGAGAGTATTAGCGCAACTAGGACGGACAA
B4galnt3	ENSMUST00000212457	CGCGGTGGTGGTACGACATGAAGTTGAGGTGGGAGAGTATTACTGCTCAAGAGTCTTCCCAGGTCTGTCACATGTGGTTTGGAGATGATAGAAGCGCAACTAGGACGGACAA
B4galnt3	ENSMUST00000212457	CGCGGTGGTGGTACGACATGAAGGTTAGGTTGAGAATAGGATAAACTCACTGGCTTGGAAATTTGACTCTGAAGGGTGTGTTTGTAAAGGGTAGCGCAACTAGGACGGACAA
B4galnt3	ENSMUST00000212457	CGCGGTGGTGGTACGACATGATGTGGTTTGGAGATGATAGATCAGAGGCACTCGAAAGAGGGTGTCCCGAGAAGGGTGTGTTTGTAAAGGGTAGCGCAACTAGGACGGACAA
B4galnt3	ENSMUST00000212457	CGCGGTGGTGGTACGACATGAAGGGTGTGTTTGTAAAGGGTGTCAGTGCCTTCATCATTTTGCTTGTGCAGAAGTTGAGGTGGGAGAGTATTAGCGCAACTAGGACGGACAA
B4galnt3	ENSMUST00000212457	CGCGGTGGTGGTACGACATGATGTGGTTTGGAGATGATAGAATGTCTGTGACGGTTGCGTGGGCTCCAGACAAGGTTAGGTTGAGAATAGGAAGCGCAACTAGGACGGACAA
B4galnt3	ENSMUST00000212457	CGCGGTGGTGGTACGACATGAAGTTGAGGTGGGAGAGTATTACTCCTTGGTGTTCATGCCTCCGATCTTGTAAGGTTAGGTTGAGAATAGGAAGCGCAACTAGGACGGACAA
B4galnt3	ENSMUST00000212457	CGCGGTGGTGGTACGACATGAAGTTGAGGTGGGAGAGTATTGTCTGTGGGATATGGCCCACCTCATCCATCATGTGGTTTGGAGATGATAGAAGCGCAACTAGGACGGACAA
B4galnt3	ENSMUST00000212457	CGCGGTGGTGGTACGACATGAAGGGTGTGTTTGTAAAGGGTGACTTGGCGATCAGAGGCACTCGAAAGAGGAAGGTTAGGTTGAGAATAGGAAGCGCAACTAGGACGGACAA
B4galnt3	ENSMUST00000212457	CGCGGTGGTGGTACGACATGAAGGGTGTGTTTGTAAAGGGTGTTCTGTTTGGAAAGAGGCGCTACAGGGCCATGTGGTTTGGAGATGATAGAAGCGCAACTAGGACGGACAA
Barx2	ENSMUST00000116615	CGCGGTGGTGGTACGACATGAGAGGGTTTGTAAGGTGAATAAACTACAGAAATAAGCGCCGAGTCAGCAAGAGGGATGTATTGAAGGAGGATAGCGCAACTAGGACGGACAA
Barx2	ENSMUST00000116615	CGCGGTGGTGGTACGACATGAGGGATGTATTGAAGGAGGATTGTAGCCAGCCCTGCAGCTATCACCCAAGCATGTGGTTTGGAGATGATAGAAGCGCAACTAGGACGGACAA
Barx2	ENSMUST00000116615	CGCGGTGGTGGTACGACATGAAGTTGAGGTGGGAGAGTATTCCTCGTAACTCACAACTCCCTCCAACTCCTAGGGATGTATTGAAGGAGGATAGCGCAACTAGGACGGACAA
Barx2	ENSMUST00000116615	CGCGGTGGTGGTACGACATGAGAGGGTTTGTAAGGTGAATAAAGACCATCAGGTCTGTCGGCACCTGACCGATGTGGTTTGGAGATGATAGAAGCGCAACTAGGACGGACAA
Barx2	ENSMUST00000116615	CGCGGTGGTGGTACGACATGAAGTTGAGGTGGGAGAGTATTTTCCCCACCCGACCCCACCCTCAAAAAAAAAGAGGGTTTGTAAGGTGAATAAGCGCAACTAGGACGGACAA
Barx2	ENSMUST00000116615	CGCGGTGGTGGTACGACATGATGTGGTTTGGAGATGATAGACCCTTACAGAAGGGTATCTGTGCCTAACACAAGTTGAGGTGGGAGAGTATTAGCGCAACTAGGACGGACAA
Barx2	ENSMUST00000116615	CGCGGTGGTGGTACGACATGAGGGATGTATTGAAGGAGGATACAGGAGAGGATATGCCCGTAGGGAAGGGGAGAGGGTTTGTAAGGTGAATAAGCGCAACTAGGACGGACAA
Barx2	ENSMUST00000116615	CGCGGTGGTGGTACGACATGATGTGGTTTGGAGATGATAGAGATGGTGCGACTTCTGCGTGGTTTCTTCTGAGGGATGTATTGAAGGAGGATAGCGCAACTAGGACGGACAA
Barx2	ENSMUST00000116615	CGCGGTGGTGGTACGACATGAGGGATGTATTGAAGGAGGATGTGATCACAGACAGGAGAGGATATGCCCGTAAGTTGAGGTGGGAGAGTATTAGCGCAACTAGGACGGACAA
Barx2	ENSMUST00000116615	CGCGGTGGTGGTACGACATGATGTGGTTTGGAGATGATAGAGGAATTTCTTCTCTAGGCCCATGAGCTGCAAGAGGGTTTGTAAGGTGAATAAGCGCAACTAGGACGGACAA
Barx2	ENSMUST00000116615	CGCGGTGGTGGTACGACATGAGAGGGTTTGTAAGGTGAATACGCCCCTTAGGTTTTGTGGGTGCTTCCTGTAAGTTGAGGTGGGAGAGTATTAGCGCAACTAGGACGGACAA
Barx2	ENSMUST00000116615	CGCGGTGGTGGTACGACATGATGTGGTTTGGAGATGATAGATAACTCCTGGGGCTGGTGAATAGGTTCTGCAAGTTGAGGTGGGAGAGTATTAGCGCAACTAGGACGGACAA
Barx2	ENSMUST00000116615	CGCGGTGGTGGTACGACATGAGAGGGTTTGTAAGGTGAATACCACCTTTAAGGACCATCTTCTTCCATTTCAGGGATGTATTGAAGGAGGATAGCGCAACTAGGACGGACAA
Barx2	ENSMUST00000116615	CGCGGTGGTGGTACGACATGAGGGATGTATTGAAGGAGGATGCACACAGAGTAGAGGGAAAGTTTCTCAAAATGTGGTTTGGAGATGATAGAAGCGCAACTAGGACGGACAA
Barx2	ENSMUST00000116615	CGCGGTGGTGGTACGACATGAAGTTGAGGTGGGAGAGTATTTGCTTGGCTGACCTGTTGCCCAGAGGAGAGAGGGATGTATTGAAGGAGGATAGCGCAACTAGGACGGACAA
Barx2	ENSMUST00000116615	CGCGGTGGTGGTACGACATGATGTGGTTTGGAGATGATAGATTTGGGCTCCTGGGTATCACAGGGCTCCTCAGAGGGTTTGTAAGGTGAATAAGCGCAACTAGGACGGACAA
Barx2	ENSMUST00000116615	CGCGGTGGTGGTACGACATGAGAGGGTTTGTAAGGTGAATAAGGGCTCCTCCTGTCTCTCCGAGGATTCCAAAGTTGAGGTGGGAGAGTATTAGCGCAACTAGGACGGACAA
Barx2	ENSMUST00000116615	CGCGGTGGTGGTACGACATGAAGTTGAGGTGGGAGAGTATTAGGGAAGGGGAACCGGTACAAGAGTGCAGGATGTGGTTTGGAGATGATAGAAGCGCAACTAGGACGGACAA
Barx2	ENSMUST00000116615	CGCGGTGGTGGTACGACATGAGGGATGTATTGAAGGAGGATGTTTTGTGGGTGCTTCCTGTCCACCTTTAAAGAGGGTTTGTAAGGTGAATAAGCGCAACTAGGACGGACAA
Barx2	ENSMUST00000116615	CGCGGTGGTGGTACGACATGATGTGGTTTGGAGATGATAGATCCGATGAAAATGACGCTGGGACGTGGGAGAGGGATGTATTGAAGGAGGATAGCGCAACTAGGACGGACAA
Barx2	ENSMUST00000116615	CGCGGTGGTGGTACGACATGAAGTTGAGGTGGGAGAGTATTAACCGGTACAAGAGTGCAGGGGCTTGGGTCAGGGATGTATTGAAGGAGGATAGCGCAACTAGGACGGACAA
Barx2	ENSMUST00000116615	CGCGGTGGTGGTACGACATGAGAGGGTTTGTAAGGTGAATATCTCTTCCCTTCTTCCCAGCTCCCCCTTCCATGTGGTTTGGAGATGATAGAAGCGCAACTAGGACGGACAA
Barx2	ENSMUST00000116615	CGCGGTGGTGGTACGACATGAAGTTGAGGTGGGAGAGTATTTTCCCAGCTCCCCCTTCCCCTCAAAGAACTAGAGGGTTTGTAAGGTGAATAAGCGCAACTAGGACGGACAA
Barx2	ENSMUST00000116615	CGCGGTGGTGGTACGACATGATGTGGTTTGGAGATGATAGATCCTTGCCTCTCTCTTCCCTTCTTCCCAGCAAGTTGAGGTGGGAGAGTATTAGCGCAACTAGGACGGACAA
Barx2	ENSMUST00000116615	CGCGGTGGTGGTACGACATGAGAGGGTTTGTAAGGTGAATACTTCTGCGTGGTTTCTTCTGCCTGGGCGTGAGGGATGTATTGAAGGAGGATAGCGCAACTAGGACGGACAA
Barx2	ENSMUST00000116615	CGCGGTGGTGGTACGACATGAGGGATGTATTGAAGGAGGATGTAGTCGCAGGTCTCCTTGGAGAGGATCTCATGTGGTTTGGAGATGATAGAAGCGCAACTAGGACGGACAA
Barx2	ENSMUST00000116615	CGCGGTGGTGGTACGACATGAAGTTGAGGTGGGAGAGTATTTTTAACAGCTTTCCCCACCCGACCCCACCCAGGGATGTATTGAAGGAGGATAGCGCAACTAGGACGGACAA
Barx2	ENSMUST00000116615	CGCGGTGGTGGTACGACATGATGTGGTTTGGAGATGATAGACACTTCCACCTACCTCTCTCTGCTTGGCTGAGAGGGTTTGTAAGGTGAATAAGCGCAACTAGGACGGACAA
Barx2	ENSMUST00000116615	CGCGGTGGTGGTACGACATGAAGTTGAGGTGGGAGAGTATTATGACTGTGGGCTGCCGGGTGATCACAGACAGAGGGTTTGTAAGGTGAATAAGCGCAACTAGGACGGACAA
Barx2	ENSMUST00000116615	CGCGGTGGTGGTACGACATGATGTGGTTTGGAGATGATAGATCTCTTCAGCTTCAATCTCCTCTGATGTGGAAGTTGAGGTGGGAGAGTATTAGCGCAACTAGGACGGACAA
Barx2	ENSMUST00000116615	CGCGGTGGTGGTACGACATGAGGGATGTATTGAAGGAGGATTGCCTAACACAGCCTTGCAAGAAGGTTAAGAGAGGGTTTGTAAGGTGAATAAGCGCAACTAGGACGGACAA
Barx2	ENSMUST00000116615	CGCGGTGGTGGTACGACATGAGGGATGTATTGAAGGAGGATTAATGGTGGGGGTTCAGAGGAAGCTTCTGAATGTGGTTTGGAGATGATAGAAGCGCAACTAGGACGGACAA
Barx2	ENSMUST00000116615	CGCGGTGGTGGTACGACATGAAGTTGAGGTGGGAGAGTATTGGGCCAAGTCCAACCTGTCTGGGGTAGACAAGGGATGTATTGAAGGAGGATAGCGCAACTAGGACGGACAA
Barx2	ENSMUST00000116615	CGCGGTGGTGGTACGACATGATGTGGTTTGGAGATGATAGACCCCTTCCCCTCAAAGAACTTTATTTTAGCAGAGGGTTTGTAAGGTGAATAAGCGCAACTAGGACGGACAA
Barx2	ENSMUST00000116615	CGCGGTGGTGGTACGACATGAAGTTGAGGTGGGAGAGTATTTCCCTCATTCTCCTTGCCTCTCTCTTCCCTAGAGGGTTTGTAAGGTGAATAAGCGCAACTAGGACGGACAA
Barx2	ENSMUST00000116615	CGCGGTGGTGGTACGACATGAAGTTGAGGTGGGAGAGTATTGGCTGGTGAATAGGTTCTGCCACCTCCAAGATGTGGTTTGGAGATGATAGAAGCGCAACTAGGACGGACAA
Barx2	ENSMUST00000116615	CGCGGTGGTGGTACGACATGAGAGGGTTTGTAAGGTGAATATGGGAACCAGGTGGGAGATGACTGTGGGCTAGGGATGTATTGAAGGAGGATAGCGCAACTAGGACGGACAA
Barx2	ENSMUST00000116615	CGCGGTGGTGGTACGACATGATGTGGTTTGGAGATGATAGAGAAGGTTAAGTCCCACACAATCGAGTCTTCAGGGATGTATTGAAGGAGGATAGCGCAACTAGGACGGACAA
Barx2	ENSMUST00000116615	CGCGGTGGTGGTACGACATGAGGGATGTATTGAAGGAGGATGGGGTAGACAAATACTTCTGCTTCTGGAATAAGTTGAGGTGGGAGAGTATTAGCGCAACTAGGACGGACAA
Barx2	ENSMUST00000116615	CGCGGTGGTGGTACGACATGAGAGGGTTTGTAAGGTGAATAGGTTCAGAGGAAGCTTCTGATAACTCCTGGATGTGGTTTGGAGATGATAGAAGCGCAACTAGGACGGACAA
Barx2	ENSMUST00000116615	CGCGGTGGTGGTACGACATGAAGTTGAGGTGGGAGAGTATTTCTCATAAAGGCGCAAAGGCACAGGGGTCTAGAGGGTTTGTAAGGTGAATAAGCGCAACTAGGACGGACAA
Barx2	ENSMUST00000116615	CGCGGTGGTGGTACGACATGAAGTTGAGGTGGGAGAGTATTTGTCTCTCCGAGGATTCCAGCAGCTCCTGGATGTGGTTTGGAGATGATAGAAGCGCAACTAGGACGGACAA
Barx2	ENSMUST00000116615	CGCGGTGGTGGTACGACATGAGGGATGTATTGAAGGAGGATCGATCATGAAAGTCTTGTAGCGCCGCCTGGAGAGGGTTTGTAAGGTGAATAAGCGCAACTAGGACGGACAA
Barx2	ENSMUST00000116615	CGCGGTGGTGGTACGACATGATGTGGTTTGGAGATGATAGAATTTCATCCTGCGATTCTGATACCAAGTCTAGGGATGTATTGAAGGAGGATAGCGCAACTAGGACGGACAA
Barx2	ENSMUST00000116615	CGCGGTGGTGGTACGACATGAGGGATGTATTGAAGGAGGATGCCTGGGCAATCAGATCCAAGGCGCTATCTAAGTTGAGGTGGGAGAGTATTAGCGCAACTAGGACGGACAA
Barx2	ENSMUST00000116615	CGCGGTGGTGGTACGACATGATGTGGTTTGGAGATGATAGATATCACCCAAGCCTGGGCAATCAGATCCAAAGAGGGTTTGTAAGGTGAATAAGCGCAACTAGGACGGACAA
Barx2	ENSMUST00000116615	CGCGGTGGTGGTACGACATGAAGTTGAGGTGGGAGAGTATTAGCATCTTTGACTACAGCCTTTTTGGGACAAGAGGGTTTGTAAGGTGAATAAGCGCAACTAGGACGGACAA
Barx2	ENSMUST00000116615	CGCGGTGGTGGTACGACATGAAGTTGAGGTGGGAGAGTATTCCAAACAGACAAGCAGGGCTCTGAGATGTCATGTGGTTTGGAGATGATAGAAGCGCAACTAGGACGGACAA
Barx2	ENSMUST00000116615	CGCGGTGGTGGTACGACATGAGAGGGTTTGTAAGGTGAATAGTTTCTCAAAGTAGTCGCAGGTCTCCTTGGAGGGATGTATTGAAGGAGGATAGCGCAACTAGGACGGACAA
Barx2	ENSMUST00000116615	CGCGGTGGTGGTACGACATGATGTGGTTTGGAGATGATAGACCCGCCGAGCAGCATCTTTGACTACAGCCTAGGGATGTATTGAAGGAGGATAGCGCAACTAGGACGGACAA
Barx2	ENSMUST00000116615	CGCGGTGGTGGTACGACATGAGGGATGTATTGAAGGAGGATAGCTCCTGGCTCTGAGCCTGGCTGTTCATCAAGTTGAGGTGGGAGAGTATTAGCGCAACTAGGACGGACAA
Barx2	ENSMUST00000116615	CGCGGTGGTGGTACGACATGATGTGGTTTGGAGATGATAGATTCTGCTTCTGGAATTTCTTCTCTAGGCCCAGAGGGTTTGTAAGGTGAATAAGCGCAACTAGGACGGACAA
Barx2	ENSMUST00000116615	CGCGGTGGTGGTACGACATGAGAGGGTTTGTAAGGTGAATATTCTTCTGCCTGGGCGTGGGCTGTTCTGTCAAGTTGAGGTGGGAGAGTATTAGCGCAACTAGGACGGACAA
Barx2	ENSMUST00000116615	CGCGGTGGTGGTACGACATGATGTGGTTTGGAGATGATAGAAGTTAACACTGGGGTGAGTCCCGAGCCGGTAAGTTGAGGTGGGAGAGTATTAGCGCAACTAGGACGGACAA
Barx2	ENSMUST00000116615	CGCGGTGGTGGTACGACATGAGGGATGTATTGAAGGAGGATGGCTGTTCTGTCTCTGACTCGCTGCTGGCTAGAGGGTTTGTAAGGTGAATAAGCGCAACTAGGACGGACAA
Barx2	ENSMUST00000116615	CGCGGTGGTGGTACGACATGAGGGATGTATTGAAGGAGGATTCCCACACAATCGAGTCTTCATCAAATGCTATGTGGTTTGGAGATGATAGAAGCGCAACTAGGACGGACAA
Barx2	ENSMUST00000116615	CGCGGTGGTGGTACGACATGAGGGATGTATTGAAGGAGGATTCAGATCCAAGGCGCTATCTCCCTTACAGAAAGTTGAGGTGGGAGAGTATTAGCGCAACTAGGACGGACAA
Barx2	ENSMUST00000116615	CGCGGTGGTGGTACGACATGATGTGGTTTGGAGATGATAGAGGTCTGTCGGCACCTGACCGTCTCATAAAGAGAGGGTTTGTAAGGTGAATAAGCGCAACTAGGACGGACAA
Barx2	ENSMUST00000116615	CGCGGTGGTGGTACGACATGAGAGGGTTTGTAAGGTGAATACACCTGACCGTCTCATAAAGGCGCAAAGGCAAGTTGAGGTGGGAGAGTATTAGCGCAACTAGGACGGACAA
Barx2	ENSMUST00000116615	CGCGGTGGTGGTACGACATGATGTGGTTTGGAGATGATAGAACTACAGCCTTTTTGGGACACCGCAGCTGTAAGTTGAGGTGGGAGAGTATTAGCGCAACTAGGACGGACAA
Barx2	ENSMUST00000116615	CGCGGTGGTGGTACGACATGAGAGGGTTTGTAAGGTGAATATGGGTATCACAGGGCTCCTCCTGTCTCTCCAGGGATGTATTGAAGGAGGATAGCGCAACTAGGACGGACAA
Barx2	ENSMUST00000116615	CGCGGTGGTGGTACGACATGAGGGATGTATTGAAGGAGGATAGGATTCCAGCAGCTCCTGGCTCTGAGCCTATGTGGTTTGGAGATGATAGAAGCGCAACTAGGACGGACAA
Barx2	ENSMUST00000116615	CGCGGTGGTGGTACGACATGAAGTTGAGGTGGGAGAGTATTCTGAGTGAGTCCCAGAGACTGGGCCAAGTCAGGGATGTATTGAAGGAGGATAGCGCAACTAGGACGGACAA
Barx2	ENSMUST00000116615	CGCGGTGGTGGTACGACATGATGTGGTTTGGAGATGATAGAATCTGCATTTGCAGCTTCCAGGAGGGCAACAGAGGGTTTGTAAGGTGAATAAGCGCAACTAGGACGGACAA
Barx2	ENSMUST00000116615	CGCGGTGGTGGTACGACATGAAGTTGAGGTGGGAGAGTATTTCTACCCACGTTACTAGTCTTTAGAGGTCTAGAGGGTTTGTAAGGTGAATAAGCGCAACTAGGACGGACAA
Barx2	ENSMUST00000116615	CGCGGTGGTGGTACGACATGAAGTTGAGGTGGGAGAGTATTCAGCTGTCAATCAGCGCGCACTTCCTGCAGATGTGGTTTGGAGATGATAGAAGCGCAACTAGGACGGACAA
Barx2	ENSMUST00000116615	CGCGGTGGTGGTACGACATGAGGGATGTATTGAAGGAGGATTTCACGAAGCAGGGAAGCCAAAGACCATCAAGAGGGTTTGTAAGGTGAATAAGCGCAACTAGGACGGACAA
Barx2	ENSMUST00000116615	CGCGGTGGTGGTACGACATGAGGGATGTATTGAAGGAGGATATCAAATGCTTCCGATGAAAATGACGCTGGATGTGGTTTGGAGATGATAGAAGCGCAACTAGGACGGACAA
Barx2	ENSMUST00000116615	CGCGGTGGTGGTACGACATGAAGTTGAGGTGGGAGAGTATTGTCTCCCGAGCACTTCCACCTACCTCTCTCAGGGATGTATTGAAGGAGGATAGCGCAACTAGGACGGACAA
Barx2	ENSMUST00000116615	CGCGGTGGTGGTACGACATGAGAGGGTTTGTAAGGTGAATATTTGTCTGCCTTTAACAGCTTTCCCCACCCATGTGGTTTGGAGATGATAGAAGCGCAACTAGGACGGACAA
Barx2	ENSMUST00000116615	CGCGGTGGTGGTACGACATGAGAGGGTTTGTAAGGTGAATAAAGCAGGGCTCTGAGATGTCCCTCGTAACTAAGTTGAGGTGGGAGAGTATTAGCGCAACTAGGACGGACAA
Barx2	ENSMUST00000116615	CGCGGTGGTGGTACGACATGATGTGGTTTGGAGATGATAGAAGAGGAGAGCAAGGAGGGAGAAGAGCAGCCAAGTTGAGGTGGGAGAGTATTAGCGCAACTAGGACGGACAA
Barx2	ENSMUST00000116615	CGCGGTGGTGGTACGACATGAGGGATGTATTGAAGGAGGATATGAGCTGCAGCTCGGTGAAGATGGTGCGAAGAGGGTTTGTAAGGTGAATAAGCGCAACTAGGACGGACAA
Barx2	ENSMUST00000116615	CGCGGTGGTGGTACGACATGAGGGATGTATTGAAGGAGGATAAGGAGGGAGAAGAGCAGCCCTTGCTGCAGATGTGGTTTGGAGATGATAGAAGCGCAACTAGGACGGACAA
Barx2	ENSMUST00000116615	CGCGGTGGTGGTACGACATGAAGTTGAGGTGGGAGAGTATTGGCGCTATCTCCCTTACAGAAGGGTATCTGAGGGATGTATTGAAGGAGGATAGCGCAACTAGGACGGACAA
Barx2	ENSMUST00000116615	CGCGGTGGTGGTACGACATGATGTGGTTTGGAGATGATAGATAGGTTCTGCCACCTCCAAGGGGACAAGGCAGAGGGTTTGTAAGGTGAATAAGCGCAACTAGGACGGACAA
Barx2	ENSMUST00000116615	CGCGGTGGTGGTACGACATGAAGTTGAGGTGGGAGAGTATTTCGAGTCTTCATCAAATGCTTCCGATGAAAAGAGGGTTTGTAAGGTGAATAAGCGCAACTAGGACGGACAA
Barx2	ENSMUST00000116615	CGCGGTGGTGGTACGACATGAAGTTGAGGTGGGAGAGTATTTATTTTAGCTTAATGGTGGGGGTTCAGAGGATGTGGTTTGGAGATGATAGAAGCGCAACTAGGACGGACAA
Barx2	ENSMUST00000116615	CGCGGTGGTGGTACGACATGAGGGATGTATTGAAGGAGGATGCTGTTCATCTTCTCTTCAGCTTCAATCTCAGAGGGTTTGTAAGGTGAATAAGCGCAACTAGGACGGACAA
Barx2	ENSMUST00000116615	CGCGGTGGTGGTACGACATGATGTGGTTTGGAGATGATAGAAGCCTTGCAAGAAGGTTAAGTCCCACACAAAGGGATGTATTGAAGGAGGATAGCGCAACTAGGACGGACAA
Barx2	ENSMUST00000116615	CGCGGTGGTGGTACGACATGAGGGATGTATTGAAGGAGGATGCTCGGTGAAGATGGTGCGACTTCTGCGTGAAGTTGAGGTGGGAGAGTATTAGCGCAACTAGGACGGACAA
Barx2	ENSMUST00000116615	CGCGGTGGTGGTACGACATGAGAGGGTTTGTAAGGTGAATAACAGGGGTCTCCAAACAGACAAGCAGGGCTATGTGGTTTGGAGATGATAGAAGCGCAACTAGGACGGACAA
Barx2	ENSMUST00000116615	CGCGGTGGTGGTACGACATGAGAGGGTTTGTAAGGTGAATAAAGGAGTCTGGGCAGGTCTCCCGAGCACTTAAGTTGAGGTGGGAGAGTATTAGCGCAACTAGGACGGACAA
Barx2	ENSMUST00000116615	CGCGGTGGTGGTACGACATGATGTGGTTTGGAGATGATAGATACCTCTCTCTGCTTGGCTGACCTGTTGCCAAGTTGAGGTGGGAGAGTATTAGCGCAACTAGGACGGACAA
Barx2	ENSMUST00000116615	CGCGGTGGTGGTACGACATGAGAGGGTTTGTAAGGTGAATACCCAGAGACTGGGCCAAGTCCAACCTGTCTAGGGATGTATTGAAGGAGGATAGCGCAACTAGGACGGACAA
Barx2	ENSMUST00000116615	CGCGGTGGTGGTACGACATGATGTGGTTTGGAGATGATAGAACCTGTTGCCCAGAGGAGAGCAAGGAGGGAAGGGATGTATTGAAGGAGGATAGCGCAACTAGGACGGACAA
Barx2	ENSMUST00000116615	CGCGGTGGTGGTACGACATGAGGGATGTATTGAAGGAGGATTCACTTGCAGCTGAGTGAGTCCCAGAGACTAAGTTGAGGTGGGAGAGTATTAGCGCAACTAGGACGGACAA
Barx2	ENSMUST00000116615	CGCGGTGGTGGTACGACATGAGAGGGTTTGTAAGGTGAATAGAATGGAATTCTTCTTAGGGCGCCCCTTAGATGTGGTTTGGAGATGATAGAAGCGCAACTAGGACGGACAA
Barx2	ENSMUST00000116615	CGCGGTGGTGGTACGACATGAAGTTGAGGTGGGAGAGTATTTCTCTGACTCGCTGCTGGCTAACGCCTCACAGAGGGTTTGTAAGGTGAATAAGCGCAACTAGGACGGACAA
Barx2	ENSMUST00000116615	CGCGGTGGTGGTACGACATGAAGTTGAGGTGGGAGAGTATTTGGGAGACCAGAAGTGCTCCTCTACCCACGATGTGGTTTGGAGATGATAGAAGCGCAACTAGGACGGACAA
Barx2	ENSMUST00000116615	CGCGGTGGTGGTACGACATGAGAGGGTTTGTAAGGTGAATAAGGGAAGCCAAAGACCATCAGGTCTGTCGGAGGGATGTATTGAAGGAGGATAGCGCAACTAGGACGGACAA
Barx2	ENSMUST00000116615	CGCGGTGGTGGTACGACATGAGGGATGTATTGAAGGAGGATCACAACTCCCTCCAACTCCTTTTTTTTTCTATGTGGTTTGGAGATGATAGAAGCGCAACTAGGACGGACAA
Bcl11b	ENSMUST00000066060	CGCGGTGGTGGTACGACATGAAGGTTAGGTTGAGAATAGGATGCCCAGGCAGTCTCAATTATTACAAATACAGGGATGTATTGAAGGAGGATAGCGCAACTAGGACGGACAA
Bcl11b	ENSMUST00000066060	CGCGGTGGTGGTACGACATGAGGGATGTATTGAAGGAGGATTGCCCTACAGTGCCCATCAGCGTGAGATGAAGATGATGTAGTAGTAAGGGTAGCGCAACTAGGACGGACAA
Bcl11b	ENSMUST00000066060	CGCGGTGGTGGTACGACATGAGGGATGTATTGAAGGAGGATAGTATGTCCCAACTTAATTGGAGGAAGGAAAGGGTGGTTTAGTGTGTGTTTAGCGCAACTAGGACGGACAA
Bcl11b	ENSMUST00000066060	CGCGGTGGTGGTACGACATGAGATGATGTAGTAGTAAGGGTTCAAAAGGGCAGGGTAACCCTGGGCCGTAGAAGGTTAGGTTGAGAATAGGAAGCGCAACTAGGACGGACAA
Bcl11b	ENSMUST00000066060	CGCGGTGGTGGTACGACATGAAGGTTAGGTTGAGAATAGGACGTCCTCTCTCTTCAACCAGGATTTTTTTTAGGGTGGTTTAGTGTGTGTTTAGCGCAACTAGGACGGACAA
Bcl11b	ENSMUST00000066060	CGCGGTGGTGGTACGACATGAGGGTGGTTTAGTGTGTGTTTGCACAATCACGCTTTCATAACCTGAAATGAAGATGATGTAGTAGTAAGGGTAGCGCAACTAGGACGGACAA
Bcl11b	ENSMUST00000066060	CGCGGTGGTGGTACGACATGAAGGTTAGGTTGAGAATAGGACGCTACCATCTTATAGACTGCCTCTTGGAGAGGGATGTATTGAAGGAGGATAGCGCAACTAGGACGGACAA
Bcl11b	ENSMUST00000066060	CGCGGTGGTGGTACGACATGAGATGATGTAGTAGTAAGGGTTCTTTACCTGACAACTCACACTGGCATCCAAGGGATGTATTGAAGGAGGATAGCGCAACTAGGACGGACAA
Bcl11b	ENSMUST00000066060	CGCGGTGGTGGTACGACATGAGGGATGTATTGAAGGAGGATGTCACCTCCACTCCATATCTAAGCAGCGTTAGGGTGGTTTAGTGTGTGTTTAGCGCAACTAGGACGGACAA
Bcl11b	ENSMUST00000066060	CGCGGTGGTGGTACGACATGAAGGTTAGGTTGAGAATAGGAAAGCAAACCGCAGAGATCAATGTGCCTTGGAGATGATGTAGTAGTAAGGGTAGCGCAACTAGGACGGACAA
Bcl11b	ENSMUST00000066060	CGCGGTGGTGGTACGACATGAAGGTTAGGTTGAGAATAGGATGCTTGGCCTCTTAGACTTGTAAATGTCTTAGGGTGGTTTAGTGTGTGTTTAGCGCAACTAGGACGGACAA
Bcl11b	ENSMUST00000066060	CGCGGTGGTGGTACGACATGAGGGTGGTTTAGTGTGTGTTTCCCACGTATGCGCTTAGCTCCTCTCAGCCTAGATGATGTAGTAGTAAGGGTAGCGCAACTAGGACGGACAA
Bcl11b	ENSMUST00000066060	CGCGGTGGTGGTACGACATGAAGGTTAGGTTGAGAATAGGAGAAAAATACGCACAGGTCAGAAGTGTGATTAGGGATGTATTGAAGGAGGATAGCGCAACTAGGACGGACAA
Bcl11b	ENSMUST00000066060	CGCGGTGGTGGTACGACATGAGATGATGTAGTAGTAAGGGTTTGCTCTGGAACTTGAAGGTCTTGCCGCAGAGGGATGTATTGAAGGAGGATAGCGCAACTAGGACGGACAA
Bcl11b	ENSMUST00000066060	CGCGGTGGTGGTACGACATGAGGGATGTATTGAAGGAGGATTCTCGTTCTCCAGCAGCAGCTCCTCTTCTTAGGGTGGTTTAGTGTGTGTTTAGCGCAACTAGGACGGACAA
Bcl11b	ENSMUST00000066060	CGCGGTGGTGGTACGACATGAGATGATGTAGTAGTAAGGGTCATCAGGGCCAGTTGTCTGCTTGGGACACAAAGGTTAGGTTGAGAATAGGAAGCGCAACTAGGACGGACAA
Bcl11b	ENSMUST00000066060	CGCGGTGGTGGTACGACATGAGGGTGGTTTAGTGTGTGTTTGCTCTTTCTTCTGGGCTGTGTTTTTGTTTTAAGGTTAGGTTGAGAATAGGAAGCGCAACTAGGACGGACAA
Bcl11b	ENSMUST00000066060	CGCGGTGGTGGTACGACATGAGATGATGTAGTAGTAAGGGTACTGAGACTTAGGCCTGGCCTCCCACTAGGAGGGTGGTTTAGTGTGTGTTTAGCGCAACTAGGACGGACAA
Bcl11b	ENSMUST00000066060	CGCGGTGGTGGTACGACATGAAGGTTAGGTTGAGAATAGGAGTGCTGTAGACGCTGAAGGGCATCTGGCAGAGGGATGTATTGAAGGAGGATAGCGCAACTAGGACGGACAA
Bcl11b	ENSMUST00000066060	CGCGGTGGTGGTACGACATGAGATGATGTAGTAGTAAGGGTACGATTCTGCTAATAGATGTCCAGGGCTGTAGGGATGTATTGAAGGAGGATAGCGCAACTAGGACGGACAA
Bcl11b	ENSMUST00000066060	CGCGGTGGTGGTACGACATGAGGGTGGTTTAGTGTGTGTTTCGCTCCAACACACATACACACGATTTATTTAGGGATGTATTGAAGGAGGATAGCGCAACTAGGACGGACAA
Bcl11b	ENSMUST00000066060	CGCGGTGGTGGTACGACATGAGATGATGTAGTAGTAAGGGTGGGAACATAGATGGGAAGGCACAGAATTCCAAGGTTAGGTTGAGAATAGGAAGCGCAACTAGGACGGACAA
Bcl11b	ENSMUST00000066060	CGCGGTGGTGGTACGACATGAAGGTTAGGTTGAGAATAGGATGCGTGGGAAGAGAGCTGGAAAGGGCTCTGAGGGTGGTTTAGTGTGTGTTTAGCGCAACTAGGACGGACAA
Bcl11b	ENSMUST00000066060	CGCGGTGGTGGTACGACATGAGGGTGGTTTAGTGTGTGTTTCCTAGCCATTGTGGCATTCTGTATAACCTAAGATGATGTAGTAGTAAGGGTAGCGCAACTAGGACGGACAA
Bcl11b	ENSMUST00000066060	CGCGGTGGTGGTACGACATGAAGGTTAGGTTGAGAATAGGAGGCCAAAGACAAGAATATGCTGCAATTTCTAGGGATGTATTGAAGGAGGATAGCGCAACTAGGACGGACAA
Bcl11b	ENSMUST00000066060	CGCGGTGGTGGTACGACATGAGATGATGTAGTAGTAAGGGTCTGTGTTCGCTTCAGGGTTCACATTTTGCTAGGGATGTATTGAAGGAGGATAGCGCAACTAGGACGGACAA
Bcl11b	ENSMUST00000066060	CGCGGTGGTGGTACGACATGAGGGTGGTTTAGTGTGTGTTTTCGAGTAATCCAGTCTCCTCTCCCCCCACCAGGGATGTATTGAAGGAGGATAGCGCAACTAGGACGGACAA
Bcl11b	ENSMUST00000066060	CGCGGTGGTGGTACGACATGAAGGTTAGGTTGAGAATAGGAGGGTAGGTTGGTTGGTTGATTTTTCTCTTTAGATGATGTAGTAGTAAGGGTAGCGCAACTAGGACGGACAA
Bcl11b	ENSMUST00000066060	CGCGGTGGTGGTACGACATGAGGGTGGTTTAGTGTGTGTTTTTTCTTTCGGGGTCTGGTAGGTGGAACGCGAAGGTTAGGTTGAGAATAGGAAGCGCAACTAGGACGGACAA
Bcl11b	ENSMUST00000066060	CGCGGTGGTGGTACGACATGAGGGTGGTTTAGTGTGTGTTTGGTTCCAATAGGGAGCAACTTTGGGTAAAGAGATGATGTAGTAGTAAGGGTAGCGCAACTAGGACGGACAA
Bcl11b	ENSMUST00000066060	CGCGGTGGTGGTACGACATGAGGGATGTATTGAAGGAGGATGGGTCAACAGAATTCAAACATCAAATCCCAAAGGTTAGGTTGAGAATAGGAAGCGCAACTAGGACGGACAA
Bcl11b	ENSMUST00000066060	CGCGGTGGTGGTACGACATGAGGGATGTATTGAAGGAGGATGACAGTAGGTGGTCATCTTCATCAGGGGTGAGATGATGTAGTAGTAAGGGTAGCGCAACTAGGACGGACAA
Bcl11b	ENSMUST00000066060	CGCGGTGGTGGTACGACATGAGGGTGGTTTAGTGTGTGTTTACTCTCCTGAGCTCAGAGCGAGAGGAGGGAAGGGATGTATTGAAGGAGGATAGCGCAACTAGGACGGACAA
Bcl11b	ENSMUST00000066060	CGCGGTGGTGGTACGACATGAAGGTTAGGTTGAGAATAGGATAGGAAGATCGGTTTTCAAGGCACGCACATAGATGATGTAGTAGTAAGGGTAGCGCAACTAGGACGGACAA
Bcl11b	ENSMUST00000066060	CGCGGTGGTGGTACGACATGAAGGTTAGGTTGAGAATAGGAGTGGGGGCTGTTCCTAGAGTCACCCTGGAAAGGGTGGTTTAGTGTGTGTTTAGCGCAACTAGGACGGACAA
Bcl11b	ENSMUST00000066060	CGCGGTGGTGGTACGACATGAGGGTGGTTTAGTGTGTGTTTTCGATTCTCTCTGCTCCTGAGCGTGGCCAGAGATGATGTAGTAGTAAGGGTAGCGCAACTAGGACGGACAA
Bcl11b	ENSMUST00000066060	CGCGGTGGTGGTACGACATGAGGGATGTATTGAAGGAGGATGGCCCAAAATCTTGTACAGAGAAGAAACAAAAGGTTAGGTTGAGAATAGGAAGCGCAACTAGGACGGACAA
Bcl11b	ENSMUST00000066060	CGCGGTGGTGGTACGACATGAGATGATGTAGTAGTAAGGGTTTCAGGCGCATGACTCGGTCGAAGGCACTGAGGGATGTATTGAAGGAGGATAGCGCAACTAGGACGGACAA
Bcl11b	ENSMUST00000066060	CGCGGTGGTGGTACGACATGAGGGATGTATTGAAGGAGGATAGTTCCCTCTGGGACAAGTGCTGCGGGTTGAGGGTGGTTTAGTGTGTGTTTAGCGCAACTAGGACGGACAA
Bcl11b	ENSMUST00000066060	CGCGGTGGTGGTACGACATGAAGGTTAGGTTGAGAATAGGAAAAGTTGAATTCCACACAGAGACGCCTCTGAGATGATGTAGTAGTAAGGGTAGCGCAACTAGGACGGACAA
Bcl11b	ENSMUST00000066060	CGCGGTGGTGGTACGACATGAAGGTTAGGTTGAGAATAGGAGAGAAGCCATCTTGCCAGGAGAAGCCTGAGAGGGTGGTTTAGTGTGTGTTTAGCGCAACTAGGACGGACAA
Bcl11b	ENSMUST00000066060	CGCGGTGGTGGTACGACATGAGATGATGTAGTAGTAAGGGTGGACTTAACATACAAATGTGGGTGGGATTTAGGGTGGTTTAGTGTGTGTTTAGCGCAACTAGGACGGACAA
Bcl11b	ENSMUST00000066060	CGCGGTGGTGGTACGACATGAAGGTTAGGTTGAGAATAGGACAAACAACCCTCCCCCCACCCCATACAAGAAGGGATGTATTGAAGGAGGATAGCGCAACTAGGACGGACAA
Bcl11b	ENSMUST00000066060	CGCGGTGGTGGTACGACATGAGGGATGTATTGAAGGAGGATGTAGAGCCCTTAGGCTGGGTCACCTGCTTCAGATGATGTAGTAGTAAGGGTAGCGCAACTAGGACGGACAA
Bcl11b	ENSMUST00000066060	CGCGGTGGTGGTACGACATGAGGGATGTATTGAAGGAGGATGAGAAGCGCAGGCTGCCGTTCTCAGAGGAAAGGGTGGTTTAGTGTGTGTTTAGCGCAACTAGGACGGACAA
Bcl11b	ENSMUST00000066060	CGCGGTGGTGGTACGACATGAGATGATGTAGTAGTAAGGGTTCTTTTTGAGTAGGCCAATTCTGACAGACTAAGGTTAGGTTGAGAATAGGAAGCGCAACTAGGACGGACAA
Bcl11b	ENSMUST00000066060	CGCGGTGGTGGTACGACATGAAGGTTAGGTTGAGAATAGGAGCTGGCTGGCCGGTTTCTTTAAAAATATATAGGGTGGTTTAGTGTGTGTTTAGCGCAACTAGGACGGACAA
Bcl11b	ENSMUST00000066060	CGCGGTGGTGGTACGACATGAGATGATGTAGTAGTAAGGGTGTTGCACAGCTCGCACTTGTAAGGCCGCTCAGGGTGGTTTAGTGTGTGTTTAGCGCAACTAGGACGGACAA
Bcl11b	ENSMUST00000066060	CGCGGTGGTGGTACGACATGAAGGTTAGGTTGAGAATAGGATCTTGTCCAGGACCTTGTCGTAGCAGGGGCAGGGATGTATTGAAGGAGGATAGCGCAACTAGGACGGACAA
Bcl11b	ENSMUST00000066060	CGCGGTGGTGGTACGACATGAGATGATGTAGTAGTAAGGGTCCACCTCCCGGAAAAAAAAAATGGTTTTGAAGGGATGTATTGAAGGAGGATAGCGCAACTAGGACGGACAA
Bcl11b	ENSMUST00000066060	CGCGGTGGTGGTACGACATGAGGGATGTATTGAAGGAGGATGTACCTGCACGTACATGCCAAAAAAATTACAGGGTGGTTTAGTGTGTGTTTAGCGCAACTAGGACGGACAA
Bcl11b	ENSMUST00000066060	CGCGGTGGTGGTACGACATGAGATGATGTAGTAGTAAGGGTACAGCAAAGGGCAGAGGCGGCTTCCCAATAAAGGTTAGGTTGAGAATAGGAAGCGCAACTAGGACGGACAA
Bcl11b	ENSMUST00000066060	CGCGGTGGTGGTACGACATGAAGGTTAGGTTGAGAATAGGACAATGCGATGCTAAGACAAAGTGCTACAATAGGGTGGTTTAGTGTGTGTTTAGCGCAACTAGGACGGACAA
Bcl11b	ENSMUST00000066060	CGCGGTGGTGGTACGACATGAGATGATGTAGTAGTAAGGGTCTTCATGAAGTGGCGCGATGCTGCGTAGCCAGGGTGGTTTAGTGTGTGTTTAGCGCAACTAGGACGGACAA
Bcl11b	ENSMUST00000066060	CGCGGTGGTGGTACGACATGAGGGATGTATTGAAGGAGGATGCGACCCCGCAGCTAACTTCTCCAGTTCACAAGGTTAGGTTGAGAATAGGAAGCGCAACTAGGACGGACAA
Bcl11b	ENSMUST00000066060	CGCGGTGGTGGTACGACATGAGATGATGTAGTAGTAAGGGTGTGAAGTAATCACGGAGGTGGGAGGGTGGGAGGGATGTATTGAAGGAGGATAGCGCAACTAGGACGGACAA
Bcl11b	ENSMUST00000066060	CGCGGTGGTGGTACGACATGAGGGATGTATTGAAGGAGGATGAGAAGGTAACCTCCCTTGCTCTCTCACCGAGGGTGGTTTAGTGTGTGTTTAGCGCAACTAGGACGGACAA
Bcl11b	ENSMUST00000066060	CGCGGTGGTGGTACGACATGAGATGATGTAGTAGTAAGGGTGATGGCTTGCTCTAAAATAGAGAAAAGGCTAAGGTTAGGTTGAGAATAGGAAGCGCAACTAGGACGGACAA
Bcl11b	ENSMUST00000066060	CGCGGTGGTGGTACGACATGAGGGTGGTTTAGTGTGTGTTTAACTGTGTCAAATGGGAAACAGTGAGACAGAAGGTTAGGTTGAGAATAGGAAGCGCAACTAGGACGGACAA
Bcl11b	ENSMUST00000066060	CGCGGTGGTGGTACGACATGAGGGTGGTTTAGTGTGTGTTTTCCATGGCAGGAGAGTCTATGGCCATGGGGAGATGATGTAGTAGTAAGGGTAGCGCAACTAGGACGGACAA
Bcl11b	ENSMUST00000066060	CGCGGTGGTGGTACGACATGAGGGATGTATTGAAGGAGGATTCCGAGTCCATGCTGAAGCTCGACTCAGGCAAGGTTAGGTTGAGAATAGGAAGCGCAACTAGGACGGACAA
Bcl11b	ENSMUST00000066060	CGCGGTGGTGGTACGACATGAGGGATGTATTGAAGGAGGATCTTCTCTCTGCAGTTGACAGAGACACACAAAGATGATGTAGTAGTAAGGGTAGCGCAACTAGGACGGACAA
Bcl11b	ENSMUST00000066060	CGCGGTGGTGGTACGACATGAGGGATGTATTGAAGGAGGATATCACGGAATCAAACCTCGGACGGGGAGGGAGGGTGGTTTAGTGTGTGTTTAGCGCAACTAGGACGGACAA
Bcl11b	ENSMUST00000066060	CGCGGTGGTGGTACGACATGAAGGTTAGGTTGAGAATAGGATGTGGAGTGTATCATTATTCCCTCATCCAAAGATGATGTAGTAGTAAGGGTAGCGCAACTAGGACGGACAA
Bcl11b	ENSMUST00000066060	CGCGGTGGTGGTACGACATGAAGGTTAGGTTGAGAATAGGATCTGGCATCGCCCGGAAAGCTGCACAGATGAGGGTGGTTTAGTGTGTGTTTAGCGCAACTAGGACGGACAA
Bcl11b	ENSMUST00000066060	CGCGGTGGTGGTACGACATGAGATGATGTAGTAGTAAGGGTAAAAAAGCAGCACCCCCCCACACACACACAAGGGTGGTTTAGTGTGTGTTTAGCGCAACTAGGACGGACAA
Bcl11b	ENSMUST00000066060	CGCGGTGGTGGTACGACATGAGGGATGTATTGAAGGAGGATAAGGAAGAGAAAAGAGGGTTTGGGGAGAGGAAGGTTAGGTTGAGAATAGGAAGCGCAACTAGGACGGACAA
Bcl11b	ENSMUST00000066060	CGCGGTGGTGGTACGACATGAGGGATGTATTGAAGGAGGATGAGTCATTGCTCAGACTACTACTGGGTTATAGATGATGTAGTAGTAAGGGTAGCGCAACTAGGACGGACAA
Bcl11b	ENSMUST00000066060	CGCGGTGGTGGTACGACATGAGGGTGGTTTAGTGTGTGTTTATATCTCCTGGTAACACACAATTGCAGGATAGGGATGTATTGAAGGAGGATAGCGCAACTAGGACGGACAA
Bcl11b	ENSMUST00000066060	CGCGGTGGTGGTACGACATGAGATGATGTAGTAGTAAGGGTGTCAAGTTACCACTGTAGCAATGGACACCTAAGGTTAGGTTGAGAATAGGAAGCGCAACTAGGACGGACAA
Bcl11b	ENSMUST00000066060	CGCGGTGGTGGTACGACATGAGGGTGGTTTAGTGTGTGTTTATCCTCGGCCCATTTTATGCAGCCAAATCTAAGGTTAGGTTGAGAATAGGAAGCGCAACTAGGACGGACAA
Bcl11b	ENSMUST00000066060	CGCGGTGGTGGTACGACATGAGATGATGTAGTAGTAAGGGTCCTCCACACTGTTTCTTCTTGTGCTCTATAAGGGTGGTTTAGTGTGTGTTTAGCGCAACTAGGACGGACAA
Bcl11b	ENSMUST00000066060	CGCGGTGGTGGTACGACATGAGGGATGTATTGAAGGAGGATTCCGGGAAGAGAGAACGGGTGAGATTCCTTAAGGTTAGGTTGAGAATAGGAAGCGCAACTAGGACGGACAA
Bcl11b	ENSMUST00000066060	CGCGGTGGTGGTACGACATGAGGGATGTATTGAAGGAGGATCACATGCCACTTTTCATTTCAGGACAAAGTAGATGATGTAGTAGTAAGGGTAGCGCAACTAGGACGGACAA
Bcl11b	ENSMUST00000066060	CGCGGTGGTGGTACGACATGAGGGATGTATTGAAGGAGGATGTCTTTCTCCACCTTGATGCGCTTGGCCGCAGGGTGGTTTAGTGTGTGTTTAGCGCAACTAGGACGGACAA
Bcl11b	ENSMUST00000066060	CGCGGTGGTGGTACGACATGAGATGATGTAGTAGTAAGGGTTGCACTGAGGCGGTGTGGGTCCAAGTGATGAAGGTTAGGTTGAGAATAGGAAGCGCAACTAGGACGGACAA
Bcl11b	ENSMUST00000066060	CGCGGTGGTGGTACGACATGAGGGTGGTTTAGTGTGTGTTTGCATTCTGGTGATAGGTGAGCTGGTGAGCAAAGGTTAGGTTGAGAATAGGAAGCGCAACTAGGACGGACAA
Bcl11b	ENSMUST00000066060	CGCGGTGGTGGTACGACATGAGATGATGTAGTAGTAAGGGTCGCCAAGCTCCCCCAGAAAAGGACATTATCAGGGTGGTTTAGTGTGTGTTTAGCGCAACTAGGACGGACAA
Bcl11b	ENSMUST00000066060	CGCGGTGGTGGTACGACATGAGGGATGTATTGAAGGAGGATTCCCCCTTTAAACCCCAAATACAAGTTTCTAAGGTTAGGTTGAGAATAGGAAGCGCAACTAGGACGGACAA
Bcl11b	ENSMUST00000066060	CGCGGTGGTGGTACGACATGAGGGATGTATTGAAGGAGGATGCTGGGTTTATTTCTTCATTTGACTGGTCTAGATGATGTAGTAGTAAGGGTAGCGCAACTAGGACGGACAA
Bcl11b	ENSMUST00000066060	CGCGGTGGTGGTACGACATGAGGGTGGTTTAGTGTGTGTTTTTCGCAGACACAGGTTAGGCTGGACTGCCGAGGGATGTATTGAAGGAGGATAGCGCAACTAGGACGGACAA
Bcl11b	ENSMUST00000066060	CGCGGTGGTGGTACGACATGAGATGATGTAGTAGTAAGGGTAGACAAAACACAGAAACGGAAGCAGCGTGGAAGGTTAGGTTGAGAATAGGAAGCGCAACTAGGACGGACAA
Bcl11b	ENSMUST00000066060	CGCGGTGGTGGTACGACATGAAGGTTAGGTTGAGAATAGGACCAAACTTGCTGTAAGAGACAAACCCTCTAAGGGTGGTTTAGTGTGTGTTTAGCGCAACTAGGACGGACAA
Bcl11b	ENSMUST00000066060	CGCGGTGGTGGTACGACATGAGGGTGGTTTAGTGTGTGTTTAGATGGGTCGCTCTCATGGTGGCGGAAGTCAGATGATGTAGTAGTAAGGGTAGCGCAACTAGGACGGACAA
Bcl11b	ENSMUST00000066060	CGCGGTGGTGGTACGACATGAAGGTTAGGTTGAGAATAGGACTTCATGTGGCGCGTGAGCTTGCTGCTCTGAGGGATGTATTGAAGGAGGATAGCGCAACTAGGACGGACAA
Bcl11b	ENSMUST00000066060	CGCGGTGGTGGTACGACATGAGGGATGTATTGAAGGAGGATGTGAATCAAAGCATGTCTCTTTCTGTGTCTAGATGATGTAGTAGTAAGGGTAGCGCAACTAGGACGGACAA
Bcl11b	ENSMUST00000066060	CGCGGTGGTGGTACGACATGAGGGTGGTTTAGTGTGTGTTTGAGGAGGAGGAGAAAAGAGGAGGAGGAGGAAGGGATGTATTGAAGGAGGATAGCGCAACTAGGACGGACAA
Bcl11b	ENSMUST00000066060	CGCGGTGGTGGTACGACATGAGATGATGTAGTAGTAAGGGTCCACGCTTAGCAACACTGACACTCAATCTCAAGGTTAGGTTGAGAATAGGAAGCGCAACTAGGACGGACAA
Bcl11b	ENSMUST00000066060	CGCGGTGGTGGTACGACATGAAGGTTAGGTTGAGAATAGGACACCGTCAGGTTGCTACAGTTCTTGAAGACAGGGTGGTTTAGTGTGTGTTTAGCGCAACTAGGACGGACAA
Bcl11b	ENSMUST00000066060	CGCGGTGGTGGTACGACATGAGATGATGTAGTAGTAAGGGTACACGTTCTCAGATGGGATGAGGGCGGCAGAGGGTGGTTTAGTGTGTGTTTAGCGCAACTAGGACGGACAA
Bcl11b	ENSMUST00000066060	CGCGGTGGTGGTACGACATGAGGGATGTATTGAAGGAGGATGTCCTTGTGCTTTAGGATGGCTTAGTCCTGAAGGTTAGGTTGAGAATAGGAAGCGCAACTAGGACGGACAA
Bcl11b	ENSMUST00000066060	CGCGGTGGTGGTACGACATGAGATGATGTAGTAGTAAGGGTGAAGGGCTTTCTTTTCTCCACTCAACACAAAGGGATGTATTGAAGGAGGATAGCGCAACTAGGACGGACAA
Bdnf	ENSMUST00000111050	CGCGGTGGTGGTACGACATGAAGAGTGAGTAGTAGTGGAGTGTATGCTTTGAACAAATGCTGGTCTTTCCAAAGGGTGTGTTTGTAAAGGGTAGCGCAACTAGGACGGACAA
Bdnf	ENSMUST00000111050	CGCGGTGGTGGTACGACATGAAGAGTGAGTAGTAGTGGAGTCAGTGGTATTCCAAAAGACAGGCTAACTCGATGTGGAGGGATTGAAGGATAAGCGCAACTAGGACGGACAA
Bdnf	ENSMUST00000111050	CGCGGTGGTGGTACGACATGAAGTGTGGGATTGATGAGATATAAGCAACTTGACACATCATTCCAGAGCCTAAGAGTGAGTAGTAGTGGAGTAGCGCAACTAGGACGGACAA
Bdnf	ENSMUST00000111050	CGCGGTGGTGGTACGACATGATGTGGAGGGATTGAAGGATACAGAACAGAACCAGAACGAACAGAAACGAAAAGGGTGTGTTTGTAAAGGGTAGCGCAACTAGGACGGACAA
Bdnf	ENSMUST00000111050	CGCGGTGGTGGTACGACATGAAGGGTGTGTTTGTAAAGGGTTGAGCACTGTTAGGTAATGTAGGCACTTAAAAGTGTGGGATTGATGAGATAAGCGCAACTAGGACGGACAA
Bdnf	ENSMUST00000111050	CGCGGTGGTGGTACGACATGAAGTGTGGGATTGATGAGATAACCTCCATCCTAGACCTTAGGATGGCCACTATGTGGAGGGATTGAAGGATAAGCGCAACTAGGACGGACAA
Bdnf	ENSMUST00000111050	CGCGGTGGTGGTACGACATGAAGAGTGAGTAGTAGTGGAGTGCACTTGACTGCTGAGCATCACCCGGGAAGAAGGGTGTGTTTGTAAAGGGTAGCGCAACTAGGACGGACAA
Bdnf	ENSMUST00000111050	CGCGGTGGTGGTACGACATGATGTGGAGGGATTGAAGGATAATGTATCTTAGTGGGTAAGAGAGCCAGCCAAAGAGTGAGTAGTAGTGGAGTAGCGCAACTAGGACGGACAA
Bdnf	ENSMUST00000111050	CGCGGTGGTGGTACGACATGAAGAGTGAGTAGTAGTGGAGTGCAGAAGGCCTAAGCAACTTGACACATCATAAGTGTGGGATTGATGAGATAAGCGCAACTAGGACGGACAA
Bdnf	ENSMUST00000111050	CGCGGTGGTGGTACGACATGATGTGGAGGGATTGAAGGATATATTTCAATGGCAGTGTGGATCCCTGCTCTAAGGGTGTGTTTGTAAAGGGTAGCGCAACTAGGACGGACAA
Bdnf	ENSMUST00000111050	CGCGGTGGTGGTACGACATGAAGGGTGTGTTTGTAAAGGGTGTATGTCAGCTCCACTTAGCCTCCGCAGGGAAGTGTGGGATTGATGAGATAAGCGCAACTAGGACGGACAA
Bdnf	ENSMUST00000111050	CGCGGTGGTGGTACGACATGAAGTGTGGGATTGATGAGATATCTCTTCAGTTAAAAGGGGGAGGGGGCGAGATGTGGAGGGATTGAAGGATAAGCGCAACTAGGACGGACAA
Bdnf	ENSMUST00000111050	CGCGGTGGTGGTACGACATGAAGGGTGTGTTTGTAAAGGGTCCCTTGCAGTACTGTAAGATTGTGATGGGGAAGAGTGAGTAGTAGTGGAGTAGCGCAACTAGGACGGACAA
Bdnf	ENSMUST00000111050	CGCGGTGGTGGTACGACATGAAGAGTGAGTAGTAGTGGAGTCAAGGCCACAGACATTTACTTACAGTTTCAATGTGGAGGGATTGAAGGATAAGCGCAACTAGGACGGACAA
Bdnf	ENSMUST00000111050	CGCGGTGGTGGTACGACATGAAGAGTGAGTAGTAGTGGAGTAAACATTTCTGCCAACAAGAGACCACAGCAAAGTGTGGGATTGATGAGATAAGCGCAACTAGGACGGACAA
Bdnf	ENSMUST00000111050	CGCGGTGGTGGTACGACATGAAGGGTGTGTTTGTAAAGGGTCCAGCCAATTCTCTTTTTGCTATCCATAGTATGTGGAGGGATTGAAGGATAAGCGCAACTAGGACGGACAA
Bdnf	ENSMUST00000111050	CGCGGTGGTGGTACGACATGAAGTGTGGGATTGATGAGATATCATAGACATGTTTGCGGCATCCAGGTAATAAGGGTGTGTTTGTAAAGGGTAGCGCAACTAGGACGGACAA
Bdnf	ENSMUST00000111050	CGCGGTGGTGGTACGACATGAAGTGTGGGATTGATGAGATAGATTGGGTAGTTCGGCATTGCGAGTTCCAGATGTGGAGGGATTGAAGGATAAGCGCAACTAGGACGGACAA
Bdnf	ENSMUST00000111050	CGCGGTGGTGGTACGACATGAAGAGTGAGTAGTAGTGGAGTTGTCGTCGTCAGACCTCTCGAACCTGCCCTAAGGGTGTGTTTGTAAAGGGTAGCGCAACTAGGACGGACAA
Bdnf	ENSMUST00000111050	CGCGGTGGTGGTACGACATGATGTGGAGGGATTGAAGGATAGTGTTCTTGTCTCTTTCACAGTGAAAGCACAAGAGTGAGTAGTAGTGGAGTAGCGCAACTAGGACGGACAA
Bdnf	ENSMUST00000111050	CGCGGTGGTGGTACGACATGAAGTGTGGGATTGATGAGATACAGCAAACATTTCCCATCATGCTGCATTAAAAGAGTGAGTAGTAGTGGAGTAGCGCAACTAGGACGGACAA
Bdnf	ENSMUST00000111050	CGCGGTGGTGGTACGACATGATGTGGAGGGATTGAAGGATAGGCTTCTGATGTGGTTAAGTTTTAATGCCAAAGGGTGTGTTTGTAAAGGGTAGCGCAACTAGGACGGACAA
Bdnf	ENSMUST00000111050	CGCGGTGGTGGTACGACATGAAGTGTGGGATTGATGAGATACAGAAATTCCTCCTGCACTGCCAGGAAATAAAGGGTGTGTTTGTAAAGGGTAGCGCAACTAGGACGGACAA
Bdnf	ENSMUST00000111050	CGCGGTGGTGGTACGACATGAAGTGTGGGATTGATGAGATAACAGACCTGGCCCTTGCAGTACTGTAAGATATGTGGAGGGATTGAAGGATAAGCGCAACTAGGACGGACAA
Bdnf	ENSMUST00000111050	CGCGGTGGTGGTACGACATGAAGAGTGAGTAGTAGTGGAGTTCAAAAGTGTCAGCCAGTGATGTCGTCGTCAAGGGTGTGTTTGTAAAGGGTAGCGCAACTAGGACGGACAA
Bdnf	ENSMUST00000111050	CGCGGTGGTGGTACGACATGAAGAGTGAGTAGTAGTGGAGTTTTTTATCTGCCGCTGTGACCCACTCGCTAATGTGGAGGGATTGAAGGATAAGCGCAACTAGGACGGACAA
Bdnf	ENSMUST00000111050	CGCGGTGGTGGTACGACATGAAGTGTGGGATTGATGAGATACATATTTGGATCCAAAGTTGCTCCAGGTTAAAGAGTGAGTAGTAGTGGAGTAGCGCAACTAGGACGGACAA
Bdnf	ENSMUST00000111050	CGCGGTGGTGGTACGACATGAAGGGTGTGTTTGTAAAGGGTATCTAGGCAGAGGCTGGGAGATTTCATGCTATGTGGAGGGATTGAAGGATAAGCGCAACTAGGACGGACAA
Bdnf	ENSMUST00000111050	CGCGGTGGTGGTACGACATGAAGTGTGGGATTGATGAGATAGCTCCATTTGATCTAGGCAGAGGCTGGGAGAAGGGTGTGTTTGTAAAGGGTAGCGCAACTAGGACGGACAA
Bdnf	ENSMUST00000111050	CGCGGTGGTGGTACGACATGAAGTGTGGGATTGATGAGATAGTACTCCTGTTCTGCAGCAAAGAAGTTAAAATGTGGAGGGATTGAAGGATAAGCGCAACTAGGACGGACAA
Bdnf	ENSMUST00000111050	CGCGGTGGTGGTACGACATGAAGAGTGAGTAGTAGTGGAGTACTCTTGTAATAAATTGGCAGGAGCCGTCTAAGGGTGTGTTTGTAAAGGGTAGCGCAACTAGGACGGACAA
Bdnf	ENSMUST00000111050	CGCGGTGGTGGTACGACATGATGTGGAGGGATTGAAGGATATGGGGAAGACCGGTCCCCAAGGTTCTAGACAAGAGTGAGTAGTAGTGGAGTAGCGCAACTAGGACGGACAA
Bdnf	ENSMUST00000111050	CGCGGTGGTGGTACGACATGAAGTGTGGGATTGATGAGATAGATGACAAAGGTTAATTTGGTAAACGGCACAAGAGTGAGTAGTAGTGGAGTAGCGCAACTAGGACGGACAA
Bdnf	ENSMUST00000111050	CGCGGTGGTGGTACGACATGAAGGGTGTGTTTGTAAAGGGTAAATCTACCCCTCCCATTCCCCGTCCCTTAATGTGGAGGGATTGAAGGATAAGCGCAACTAGGACGGACAA
Bdnf	ENSMUST00000111050	CGCGGTGGTGGTACGACATGAAGTGTGGGATTGATGAGATATAAAAGGGGGAGGGGGCGAGTCTTTGGTGGAAGGGTGTGTTTGTAAAGGGTAGCGCAACTAGGACGGACAA
Bdnf	ENSMUST00000111050	CGCGGTGGTGGTACGACATGATGTGGAGGGATTGAAGGATAGAGTCTTTGGTGGCCGATATGTACTCCTGTAAGTGTGGGATTGATGAGATAAGCGCAACTAGGACGGACAA
Bdnf	ENSMUST00000111050	CGCGGTGGTGGTACGACATGAAGAGTGAGTAGTAGTGGAGTGCCTGAGTTTTGATGCTTTTTCTGGTTTTGAAGGGTGTGTTTGTAAAGGGTAGCGCAACTAGGACGGACAA
Bdnf	ENSMUST00000111050	CGCGGTGGTGGTACGACATGATGTGGAGGGATTGAAGGATAAAGGGTAAAGTACAGACGGGACTCTTGTAAAAGAGTGAGTAGTAGTGGAGTAGCGCAACTAGGACGGACAA
Bdnf	ENSMUST00000111050	CGCGGTGGTGGTACGACATGAAGTGTGGGATTGATGAGATAGGCTATAAATGGATTTGAGTGTGGTTCTCCAAGAGTGAGTAGTAGTGGAGTAGCGCAACTAGGACGGACAA
Bdnf	ENSMUST00000111050	CGCGGTGGTGGTACGACATGAAGGGTGTGTTTGTAAAGGGTCCAAAGTTGCTCCAGGTTAATCCAACTTTAATGTGGAGGGATTGAAGGATAAGCGCAACTAGGACGGACAA
Bdnf	ENSMUST00000111050	CGCGGTGGTGGTACGACATGAAGGGTGTGTTTGTAAAGGGTATAGTGGAAATTGCATGGCGGAGGTAATACAAGTGTGGGATTGATGAGATAAGCGCAACTAGGACGGACAA
Bdnf	ENSMUST00000111050	CGCGGTGGTGGTACGACATGATGTGGAGGGATTGAAGGATAGGGACCAAAATGGGAGGAGGGAGGGAAAGAAAGTGTGGGATTGATGAGATAAGCGCAACTAGGACGGACAA
Bdnf	ENSMUST00000111050	CGCGGTGGTGGTACGACATGAAGAGTGAGTAGTAGTGGAGTTCCAGGTAATTTTTGTATTCCTCCAGCAGAAAGGGTGTGTTTGTAAAGGGTAGCGCAACTAGGACGGACAA
Bdnf	ENSMUST00000111050	CGCGGTGGTGGTACGACATGATGTGGAGGGATTGAAGGATATGTTTCCTTTCAGGTCATGGATATGTCCAAAAGAGTGAGTAGTAGTGGAGTAGCGCAACTAGGACGGACAA
Bdnf	ENSMUST00000111050	CGCGGTGGTGGTACGACATGAAGAGTGAGTAGTAGTGGAGTTTGGTGTAACCCATGGGATTACACTTGGTCAAGTGTGGGATTGATGAGATAAGCGCAACTAGGACGGACAA
Bdnf	ENSMUST00000111050	CGCGGTGGTGGTACGACATGAAGGGTGTGTTTGTAAAGGGTCATGGGCAGTGGAGTGTGAGCATTTTATTCATGTGGAGGGATTGAAGGATAAGCGCAACTAGGACGGACAA
Bdnf	ENSMUST00000111050	CGCGGTGGTGGTACGACATGAAGTGTGGGATTGATGAGATATCCTGCACTGCCAGGAAATAGTATGTCAGCAAGGGTGTGTTTGTAAAGGGTAGCGCAACTAGGACGGACAA
Bdnf	ENSMUST00000111050	CGCGGTGGTGGTACGACATGAAGTGTGGGATTGATGAGATATATTTCCCCTTCTCTTCAGTTAAAAGGGGGATGTGGAGGGATTGAAGGATAAGCGCAACTAGGACGGACAA
Bdnf	ENSMUST00000111050	CGCGGTGGTGGTACGACATGAAGGGTGTGTTTGTAAAGGGTTAGTAAGGGCCCGAACATACGATTGGGTAGAAGAGTGAGTAGTAGTGGAGTAGCGCAACTAGGACGGACAA
Bdnf	ENSMUST00000111050	CGCGGTGGTGGTACGACATGATGTGGAGGGATTGAAGGATAGGCTAACTCGAAAGGAACGAATGAACAAAAAAGAGTGAGTAGTAGTGGAGTAGCGCAACTAGGACGGACAA
Bdnf	ENSMUST00000111050	CGCGGTGGTGGTACGACATGAAGTGTGGGATTGATGAGATAGTGTCTATCCTTATGAATCGCCAGCCAATTAAGAGTGAGTAGTAGTGGAGTAGCGCAACTAGGACGGACAA
Bdnf	ENSMUST00000111050	CGCGGTGGTGGTACGACATGAAGGGTGTGTTTGTAAAGGGTCACTGCAGTCTTTTTATCTGCCGCTGTGACATGTGGAGGGATTGAAGGATAAGCGCAACTAGGACGGACAA
Bdnf	ENSMUST00000111050	CGCGGTGGTGGTACGACATGAAGTGTGGGATTGATGAGATAAGGAGAGTAACCACTAACACATTCACGCTTAAGGGTGTGTTTGTAAAGGGTAGCGCAACTAGGACGGACAA
Bdnf	ENSMUST00000111050	CGCGGTGGTGGTACGACATGAAGTGTGGGATTGATGAGATAAAACCTGACTAGGGAAATGGGCTTAACACTATGTGGAGGGATTGAAGGATAAGCGCAACTAGGACGGACAA
Bdnf	ENSMUST00000111050	CGCGGTGGTGGTACGACATGAAGAGTGAGTAGTAGTGGAGTTGTACAAGTCCGCGTCCTTATGGTTTTCTTAAGGGTGTGTTTGTAAAGGGTAGCGCAACTAGGACGGACAA
Bdnf	ENSMUST00000111050	CGCGGTGGTGGTACGACATGATGTGGAGGGATTGAAGGATACCACTCGCTAATACTGTCACACACGCTCAGAAGAGTGAGTAGTAGTGGAGTAGCGCAACTAGGACGGACAA
Bdnf	ENSMUST00000111050	CGCGGTGGTGGTACGACATGAAGAGTGAGTAGTAGTGGAGTCCAGGAAATAGTATGTCAGCTCCACTTAGCAAGTGTGGGATTGATGAGATAAGCGCAACTAGGACGGACAA
Bdnf	ENSMUST00000111050	CGCGGTGGTGGTACGACATGAAGGGTGTGTTTGTAAAGGGTAACCTTCTGGTCCTCATCCAGCAGCTCTTCATGTGGAGGGATTGAAGGATAAGCGCAACTAGGACGGACAA
Bdnf	ENSMUST00000111050	CGCGGTGGTGGTACGACATGAAGTGTGGGATTGATGAGATATCCCTGACCCATGCCAGAAGAGTGAGCTGAAAGGGTGTGTTTGTAAAGGGTAGCGCAACTAGGACGGACAA
Bdnf	ENSMUST00000111050	CGCGGTGGTGGTACGACATGAAGTGTGGGATTGATGAGATATCCCTGCTCTTATCTAAGTATCTGGGTGTAATGTGGAGGGATTGAAGGATAAGCGCAACTAGGACGGACAA
Bdnf	ENSMUST00000111050	CGCGGTGGTGGTACGACATGAAGGGTGTGTTTGTAAAGGGTGGCTCCAAAGGCACTTGACTGCTGAGCATCAAGAGTGAGTAGTAGTGGAGTAGCGCAACTAGGACGGACAA
Bdnf	ENSMUST00000111050	CGCGGTGGTGGTACGACATGAAGAGTGAGTAGTAGTGGAGTATGGGCGCCGCCTTCATGCAACCGAAGTATATGTGGAGGGATTGAAGGATAAGCGCAACTAGGACGGACAA
Bdnf	ENSMUST00000111050	CGCGGTGGTGGTACGACATGAAGAGTGAGTAGTAGTGGAGTATTCACGCTCTCCAGAGTCCCATGGGTCCGAAGTGTGGGATTGATGAGATAAGCGCAACTAGGACGGACAA
Bdnf	ENSMUST00000111050	CGCGGTGGTGGTACGACATGAAGGGTGTGTTTGTAAAGGGTCAGTTGGCCTTTGGATACCGGGACTTTCTCATGTGGAGGGATTGAAGGATAAGCGCAACTAGGACGGACAA
Bdnf	ENSMUST00000111050	CGCGGTGGTGGTACGACATGAAGTGTGGGATTGATGAGATAGCACACCTGGGTAGGCCAAGTTGCCTTGTCAAGGGTGTGTTTGTAAAGGGTAGCGCAACTAGGACGGACAA
Bdnf	ENSMUST00000111050	CGCGGTGGTGGTACGACATGATGTGGAGGGATTGAAGGATAGTCTCCTGTGAAGCCGATTAACAGACCTGGAAGTGTGGGATTGATGAGATAAGCGCAACTAGGACGGACAA
Bdnf	ENSMUST00000111050	CGCGGTGGTGGTACGACATGAAGGGTGTGTTTGTAAAGGGTGAGGGAAAGAGTATGCTTTGAACAAATGCTAAGAGTGAGTAGTAGTGGAGTAGCGCAACTAGGACGGACAA
Bdnf	ENSMUST00000111050	CGCGGTGGTGGTACGACATGAAGAGTGAGTAGTAGTGGAGTTCAGCGAGAAGCTCCATTTGATCTAGGCAGATGTGGAGGGATTGAAGGATAAGCGCAACTAGGACGGACAA
Bdnf	ENSMUST00000111050	CGCGGTGGTGGTACGACATGAAGTGTGGGATTGATGAGATACCAGCAGAAAGAGTAGAGGAGGCTCCAAAGAAGAGTGAGTAGTAGTGGAGTAGCGCAACTAGGACGGACAA
Bdnf	ENSMUST00000111050	CGCGGTGGTGGTACGACATGATGTGGAGGGATTGAAGGATATTGAGTGTGGTTCTCCAATCGAGAACCTCTAAGGGTGTGTTTGTAAAGGGTAGCGCAACTAGGACGGACAA
Bdnf	ENSMUST00000111050	CGCGGTGGTGGTACGACATGAAGTGTGGGATTGATGAGATACCGCTGTGACCCACTCGCTAATACTGTCACAAGGGTGTGTTTGTAAAGGGTAGCGCAACTAGGACGGACAA
Bdnf	ENSMUST00000111050	CGCGGTGGTGGTACGACATGATGTGGAGGGATTGAAGGATATGACTAATGTCTCTCAGAATGAAGCTGCAAAAGTGTGGGATTGATGAGATAAGCGCAACTAGGACGGACAA
Bdnf	ENSMUST00000111050	CGCGGTGGTGGTACGACATGAAGGGTGTGTTTGTAAAGGGTTAGACCTTAGGATGGCCACTCAGAAATTCCAAGAGTGAGTAGTAGTGGAGTAGCGCAACTAGGACGGACAA
Bdnf	ENSMUST00000111050	CGCGGTGGTGGTACGACATGAAGAGTGAGTAGTAGTGGAGTGCACCTTGACATTGTTTTAATTCCAACGCTATGTGGAGGGATTGAAGGATAAGCGCAACTAGGACGGACAA
Bdnf	ENSMUST00000111050	CGCGGTGGTGGTACGACATGAAGTGTGGGATTGATGAGATACGTGGACGTTTACTTCTTTCATGGGCGCCGAAGAGTGAGTAGTAGTGGAGTAGCGCAACTAGGACGGACAA
Bdnf	ENSMUST00000111050	CGCGGTGGTGGTACGACATGAAGGGTGTGTTTGTAAAGGGTTCTTCACTCCCTGAGTCACAGCGGACGTCCATGTGGAGGGATTGAAGGATAAGCGCAACTAGGACGGACAA
Bdnf	ENSMUST00000111050	CGCGGTGGTGGTACGACATGAAGTGTGGGATTGATGAGATAGCGGACGTCCACTTCTGTTTCCTTTCCACTAAGGGTGTGTTTGTAAAGGGTAGCGCAACTAGGACGGACAA
Bdnf	ENSMUST00000111050	CGCGGTGGTGGTACGACATGATGTGGAGGGATTGAAGGATAATTTCCTCCTGTGTTCTTGTCTCTTTCACAAAGTGTGGGATTGATGAGATAAGCGCAACTAGGACGGACAA
Bdnf	ENSMUST00000111050	CGCGGTGGTGGTACGACATGAAGAGTGAGTAGTAGTGGAGTGTCTCGTAGAAATACTGCTTCAGTTGGCCTAAGGGTGTGTTTGTAAAGGGTAGCGCAACTAGGACGGACAA
Bdnf	ENSMUST00000111050	CGCGGTGGTGGTACGACATGAAGAGTGAGTAGTAGTGGAGTAGCAGATATTCCAAGCATTCCTGAATAGGTATGTGGAGGGATTGAAGGATAAGCGCAACTAGGACGGACAA
Bdnf	ENSMUST00000111050	CGCGGTGGTGGTACGACATGAAGAGTGAGTAGTAGTGGAGTACCATTCCCCACCTCCATCCTAGACCTTAGAAGTGTGGGATTGATGAGATAAGCGCAACTAGGACGGACAA
Bdnf	ENSMUST00000111050	CGCGGTGGTGGTACGACATGAAGGGTGTGTTTGTAAAGGGTCGAGTTCCAGTGCCTTTTGTCTATGCCCCTATGTGGAGGGATTGAAGGATAAGCGCAACTAGGACGGACAA
Bdnf	ENSMUST00000111050	CGCGGTGGTGGTACGACATGAAGGGTGTGTTTGTAAAGGGTGAGCCAGCCACTGACCACACAATTGCTGATAAGTGTGGGATTGATGAGATAAGCGCAACTAGGACGGACAA
Bdnf	ENSMUST00000111050	CGCGGTGGTGGTACGACATGAAGTGTGGGATTGATGAGATATTCAGGCTTCCAACTTGACTTCTAACCCCAATGTGGAGGGATTGAAGGATAAGCGCAACTAGGACGGACAA
Bdnf	ENSMUST00000111050	CGCGGTGGTGGTACGACATGAAGGGTGTGTTTGTAAAGGGTGGTCAGTGTACATACACAGGAAGTGTCTATAAGAGTGAGTAGTAGTGGAGTAGCGCAACTAGGACGGACAA
Bdnf	ENSMUST00000111050	CGCGGTGGTGGTACGACATGAAGAGTGAGTAGTAGTGGAGTTCCGCAGGGCCATTCAGTCCTATTTCAATGATGTGGAGGGATTGAAGGATAAGCGCAACTAGGACGGACAA
Bdnf	ENSMUST00000111050	CGCGGTGGTGGTACGACATGAAGTGTGGGATTGATGAGATAGAGGTAATACTCGCACGCCTTCAGCGAGAAAAGAGTGAGTAGTAGTGGAGTAGCGCAACTAGGACGGACAA
Bdnf	ENSMUST00000111050	CGCGGTGGTGGTACGACATGAAGGGTGTGTTTGTAAAGGGTACATCAAGGCAGCTGCTCTGGGGAAGACCGATGTGGAGGGATTGAAGGATAAGCGCAACTAGGACGGACAA
Bdnf	ENSMUST00000111050	CGCGGTGGTGGTACGACATGAAGTGTGGGATTGATGAGATACAGACATGTCCACTGCAGTCTTTTTATCTGAAGGGTGTGTTTGTAAAGGGTAGCGCAACTAGGACGGACAA
Bdnf	ENSMUST00000111050	CGCGGTGGTGGTACGACATGATGTGGAGGGATTGAAGGATATTGTATTCCTCCAGCAGAAAGAGTAGAGGAAAGTGTGGGATTGATGAGATAAGCGCAACTAGGACGGACAA
Bdnf	ENSMUST00000111050	CGCGGTGGTGGTACGACATGAAGAGTGAGTAGTAGTGGAGTAATACTGCTTCAGTTGGCCTTTGGATACCGAAGGGTGTGTTTGTAAAGGGTAGCGCAACTAGGACGGACAA
Bdnf	ENSMUST00000111050	CGCGGTGGTGGTACGACATGATGTGGAGGGATTGAAGGATAGAATCACTATAAAAAAGCAACAGGCCTGCTAAGAGTGAGTAGTAGTGGAGTAGCGCAACTAGGACGGACAA
Bgn	ENSMUST00000033741	CGCGGTGGTGGTACGACATGAGGGTTGATTAGTGGTAGAAATTCGTAGTTCTACCAGGGAGCTGGGCAGGTAAGAGTGAGTAGTAGTGGAGTAGCGCAACTAGGACGGACAA
Bgn	ENSMUST00000033741	CGCGGTGGTGGTACGACATGAAGAGTGAGTAGTAGTGGAGTGAACACGCCCTTGGGCACTTTGCGGATACGATGTGGAGGGATTGAAGGATAAGCGCAACTAGGACGGACAA
Bgn	ENSMUST00000033741	CGCGGTGGTGGTACGACATGAAGAGTGAGTAGTAGTGGAGTGCCCACCTTGGTGATGTTGTTGGAGTGCAGAGAGATTAGAGATGAGTTGGAAGCGCAACTAGGACGGACAA
Bgn	ENSMUST00000033741	CGCGGTGGTGGTACGACATGATGTGGAGGGATTGAAGGATAAGAGACAGACAGAGATATAGGCAAGGAGATAGGGTTGATTAGTGGTAGAAAAGCGCAACTAGGACGGACAA
Bgn	ENSMUST00000033741	CGCGGTGGTGGTACGACATGAGGGTTGATTAGTGGTAGAAAGGATGCCAGTGAGCTTGGCCTCTGAGATGCAGAGATTAGAGATGAGTTGGAAGCGCAACTAGGACGGACAA
Bgn	ENSMUST00000033741	CGCGGTGGTGGTACGACATGAGAGATTAGAGATGAGTTGGATTGACAGGTAGTGAACTTGTTGAAGAGAGAATGTGGAGGGATTGAAGGATAAGCGCAACTAGGACGGACAA
Bgn	ENSMUST00000033741	CGCGGTGGTGGTACGACATGAGGGTTGATTAGTGGTAGAAAGGTTGGGAGGAATCTCCACCAGGTGGTTCTAAGAGTGAGTAGTAGTGGAGTAGCGCAACTAGGACGGACAA
Bgn	ENSMUST00000033741	CGCGGTGGTGGTACGACATGAAGAGTGAGTAGTAGTGGAGTTGAAGAGAGAACACCAGAGGATAAGGGCAGATGTGGAGGGATTGAAGGATAAGCGCAACTAGGACGGACAA
Bgn	ENSMUST00000033741	CGCGGTGGTGGTACGACATGAAGAGTGAGTAGTAGTGGAGTCCATCAAAGGCTCCTGGTTCAAAGCCACTGAGAGATTAGAGATGAGTTGGAAGCGCAACTAGGACGGACAA
Bgn	ENSMUST00000033741	CGCGGTGGTGGTACGACATGAGGGTTGATTAGTGGTAGAAAGTCTGAACCTGAAGCCTCCTCATCATTCATATGTGGAGGGATTGAAGGATAAGCGCAACTAGGACGGACAA
Bgn	ENSMUST00000033741	CGCGGTGGTGGTACGACATGAGGGTTGATTAGTGGTAGAAAGATTCCCGCCCATCTCAATGCAGTTCATGTAGAGATTAGAGATGAGTTGGAAGCGCAACTAGGACGGACAA
Bgn	ENSMUST00000033741	CGCGGTGGTGGTACGACATGATGTGGAGGGATTGAAGGATAAGATGGAAGGGGACAGGTCAATAACTCCAGAGAGATTAGAGATGAGTTGGAAGCGCAACTAGGACGGACAA
Bgn	ENSMUST00000033741	CGCGGTGGTGGTACGACATGAGGGTTGATTAGTGGTAGAAAAGCACTCCCTCTTGCTGGGTGCAACTGACCAAGAGTGAGTAGTAGTGGAGTAGCGCAACTAGGACGGACAA
Bgn	ENSMUST00000033741	CGCGGTGGTGGTACGACATGATGTGGAGGGATTGAAGGATATCTCACCAAGGCCACCATGGTGGCAACCACAAGAGTGAGTAGTAGTGGAGTAGCGCAACTAGGACGGACAA
Bgn	ENSMUST00000033741	CGCGGTGGTGGTACGACATGAGAGATTAGAGATGAGTTGGATTCTGCTCAAAGGGCAAGGCCTGGCTCAGGAAGAGTGAGTAGTAGTGGAGTAGCGCAACTAGGACGGACAA
Bgn	ENSMUST00000033741	CGCGGTGGTGGTACGACATGATGTGGAGGGATTGAAGGATAGCCACAGGGGACACATGGTCAATGTTCCTGAGGGTTGATTAGTGGTAGAAAAGCGCAACTAGGACGGACAA
Bgn	ENSMUST00000033741	CGCGGTGGTGGTACGACATGAGAGATTAGAGATGAGTTGGACTCCTTGATCCTCGTCTTGATAGCAGAGTAAGGGTTGATTAGTGGTAGAAAAGCGCAACTAGGACGGACAA
Bgn	ENSMUST00000033741	CGCGGTGGTGGTACGACATGATGTGGAGGGATTGAAGGATAAGGGGACCTAGCCATCTTGGGGAGAGAGCAAGAGATTAGAGATGAGTTGGAAGCGCAACTAGGACGGACAA
Bgn	ENSMUST00000033741	CGCGGTGGTGGTACGACATGAGGGTTGATTAGTGGTAGAAAGAGGGCTAAAGGCCTTCTCATGGATCTTGGAAGAGTGAGTAGTAGTGGAGTAGCGCAACTAGGACGGACAA
Bgn	ENSMUST00000033741	CGCGGTGGTGGTACGACATGATGTGGAGGGATTGAAGGATACTTCTTCATCTGGCTATGTTCCTCAGAGACAAGAGTGAGTAGTAGTGGAGTAGCGCAACTAGGACGGACAA
Bgn	ENSMUST00000033741	CGCGGTGGTGGTACGACATGAAGAGTGAGTAGTAGTGGAGTATAGACAACCTGGAGGAGCTTGAGATCTGGAGAGATTAGAGATGAGTTGGAAGCGCAACTAGGACGGACAA
Bgn	ENSMUST00000033741	CGCGGTGGTGGTACGACATGAGGGTTGATTAGTGGTAGAAACATCTCAATGCAGTTCATGTTCCGGAGCCCATGTGGAGGGATTGAAGGATAAGCGCAACTAGGACGGACAA
Bgn	ENSMUST00000033741	CGCGGTGGTGGTACGACATGAGGGTTGATTAGTGGTAGAAAACTCCAGAAGGAAGAAAAGTGTCAGGAAGCAGAGATTAGAGATGAGTTGGAAGCGCAACTAGGACGGACAA
Bgn	ENSMUST00000033741	CGCGGTGGTGGTACGACATGAGAGATTAGAGATGAGTTGGATGGAGATGTAGAGTTTTTGCAGCTTCCGCAATGTGGAGGGATTGAAGGATAAGCGCAACTAGGACGGACAA
Bgn	ENSMUST00000033741	CGCGGTGGTGGTACGACATGAGGGTTGATTAGTGGTAGAAACTCCTGGTTCAAAGCCACTGTTCTCCAGGGAAGAGTGAGTAGTAGTGGAGTAGCGCAACTAGGACGGACAA
Bgn	ENSMUST00000033741	CGCGGTGGTGGTACGACATGAAGAGTGAGTAGTAGTGGAGTCAGCCAGGTTGTAGCTGGGATTGACAGGTAATGTGGAGGGATTGAAGGATAAGCGCAACTAGGACGGACAA
Bgn	ENSMUST00000033741	CGCGGTGGTGGTACGACATGAGAGATTAGAGATGAGTTGGAGTGCTCTATCCATCTTTCCTAGCCCCTCTTAAGAGTGAGTAGTAGTGGAGTAGCGCAACTAGGACGGACAA
Bgn	ENSMUST00000033741	CGCGGTGGTGGTACGACATGAGGGTTGATTAGTGGTAGAAACAGGTGCAGGCTGCTTAGTTGGTGGACTAGATGTGGAGGGATTGAAGGATAAGCGCAACTAGGACGGACAA
Bgn	ENSMUST00000033741	CGCGGTGGTGGTACGACATGAGGGTTGATTAGTGGTAGAAAATAACAGGGTTGGAGAGAGGGAAAGATCCAAGAGATTAGAGATGAGTTGGAAGCGCAACTAGGACGGACAA
Bgn	ENSMUST00000033741	CGCGGTGGTGGTACGACATGAGAGATTAGAGATGAGTTGGACATATATGCATGCTTAGGAGTCAGGGGGAAATGTGGAGGGATTGAAGGATAAGCGCAACTAGGACGGACAA
Bgn	ENSMUST00000033741	CGCGGTGGTGGTACGACATGAGGGTTGATTAGTGGTAGAAAGTGATGTTGTTGGAGTGCAGATAGACAACCAAGAGTGAGTAGTAGTGGAGTAGCGCAACTAGGACGGACAA
Bgn	ENSMUST00000033741	CGCGGTGGTGGTACGACATGATGTGGAGGGATTGAAGGATAGGAGTTAGTACAGCCAGGTTGTAGCTGGGAAAGAGTGAGTAGTAGTGGAGTAGCGCAACTAGGACGGACAA
Bgn	ENSMUST00000033741	CGCGGTGGTGGTACGACATGAAGAGTGAGTAGTAGTGGAGTGTTCGTTCAGGGTCTCAGGGAGATCTTTGGAGAGATTAGAGATGAGTTGGAAGCGCAACTAGGACGGACAA
Bgn	ENSMUST00000033741	CGCGGTGGTGGTACGACATGATGTGGAGGGATTGAAGGATAGAGCTTCAGGCCATCAAAGGCTCCTGGTTCAGGGTTGATTAGTGGTAGAAAAGCGCAACTAGGACGGACAA
Bgn	ENSMUST00000033741	CGCGGTGGTGGTACGACATGAGGGTTGATTAGTGGTAGAAACTTGGGGAGAGAGCAGGGGCCAATGCAAACAGAGATTAGAGATGAGTTGGAAGCGCAACTAGGACGGACAA
Bgn	ENSMUST00000033741	CGCGGTGGTGGTACGACATGATGTGGAGGGATTGAAGGATAGGAACAATGGCGGTGGCAGTGTGCTCTATCAGAGATTAGAGATGAGTTGGAAGCGCAACTAGGACGGACAA
Bgn	ENSMUST00000033741	CGCGGTGGTGGTACGACATGAAGAGTGAGTAGTAGTGGAGTAACTCAGGCTCCCATTCTCAATCATCCGAAAGGGTTGATTAGTGGTAGAAAAGCGCAACTAGGACGGACAA
Bgn	ENSMUST00000033741	CGCGGTGGTGGTACGACATGATGTGGAGGGATTGAAGGATATTATAGGGAGTCTCTGAGTGGACATGGTTGAAGAGTGAGTAGTAGTGGAGTAGCGCAACTAGGACGGACAA
Bgn	ENSMUST00000033741	CGCGGTGGTGGTACGACATGAGAGATTAGAGATGAGTTGGACCCTCTTGACTCCGAAGCCCATAGGACAGAAAGAGTGAGTAGTAGTGGAGTAGCGCAACTAGGACGGACAA
Bgn	ENSMUST00000033741	CGCGGTGGTGGTACGACATGAGGGTTGATTAGTGGTAGAAACTGTGGTGGGGCAGTGAGTTAATATTGGGGATGTGGAGGGATTGAAGGATAAGCGCAACTAGGACGGACAA
Bgn	ENSMUST00000033741	CGCGGTGGTGGTACGACATGAGGGTTGATTAGTGGTAGAAACGGTGGCAGTGTGCTCTATCCATCTTTCCTAGAGATTAGAGATGAGTTGGAAGCGCAACTAGGACGGACAA
Bgn	ENSMUST00000033741	CGCGGTGGTGGTACGACATGAGAGATTAGAGATGAGTTGGAGCAAGGAAGAGGAGGAACACATGCCTGGATATGTGGAGGGATTGAAGGATAAGCGCAACTAGGACGGACAA
Bgn	ENSMUST00000033741	CGCGGTGGTGGTACGACATGAGGGTTGATTAGTGGTAGAAATAGCAGAGTATGAACCCTTTCCTGGACAAAAAGAGTGAGTAGTAGTGGAGTAGCGCAACTAGGACGGACAA
Bgn	ENSMUST00000033741	CGCGGTGGTGGTACGACATGAAGAGTGAGTAGTAGTGGAGTCCTCATAAGCAGCACTCCCTCTTGCTGGGTATGTGGAGGGATTGAAGGATAAGCGCAACTAGGACGGACAA
Bgn	ENSMUST00000033741	CGCGGTGGTGGTACGACATGAGAGATTAGAGATGAGTTGGATCCGAAGCCCATAGGACAGAAGTCATTGATAAGAGTGAGTAGTAGTGGAGTAGCGCAACTAGGACGGACAA
Bgn	ENSMUST00000033741	CGCGGTGGTGGTACGACATGAGGGTTGATTAGTGGTAGAAAAGGTGGTTCTTGGAGATGTAGAGTTTTTGCATGTGGAGGGATTGAAGGATAAGCGCAACTAGGACGGACAA
Bgn	ENSMUST00000033741	CGCGGTGGTGGTACGACATGAGGGTTGATTAGTGGTAGAAAGGTGGACTAGGTTGTCAGGCTGTCGGTTTGAGAGATTAGAGATGAGTTGGAAGCGCAACTAGGACGGACAA
Bgn	ENSMUST00000033741	CGCGGTGGTGGTACGACATGAGAGATTAGAGATGAGTTGGATTATAGTAGGCCCTCTTGACTCCGAAGCCCATGTGGAGGGATTGAAGGATAAGCGCAACTAGGACGGACAA
Bgn	ENSMUST00000033741	CGCGGTGGTGGTACGACATGAAGAGTGAGTAGTAGTGGAGTGGCACAGGGTTGTTGAAGAGGCTGATGCCAAGGGTTGATTAGTGGTAGAAAAGCGCAACTAGGACGGACAA
Bgn	ENSMUST00000033741	CGCGGTGGTGGTACGACATGAAGAGTGAGTAGTAGTGGAGTGGTCTCAGGGAGATCTTTGGGGATGCCAGTATGTGGAGGGATTGAAGGATAAGCGCAACTAGGACGGACAA
Bgn	ENSMUST00000033741	CGCGGTGGTGGTACGACATGAAGAGTGAGTAGTAGTGGAGTTCAGACATGAGCAAGGAAGAGGAGGAACACAGAGATTAGAGATGAGTTGGAAGCGCAACTAGGACGGACAA
Bgn	ENSMUST00000033741	CGCGGTGGTGGTACGACATGATGTGGAGGGATTGAAGGATATCTCTGAGTGGACATGGTTGATGAATGTTAAGGGTTGATTAGTGGTAGAAAAGCGCAACTAGGACGGACAA
Bgn	ENSMUST00000033741	CGCGGTGGTGGTACGACATGAGGGTTGATTAGTGGTAGAAACCTCTCCAGGGGCTAGGAAGCTCCTTGATCAGAGATTAGAGATGAGTTGGAAGCGCAACTAGGACGGACAA
Bgn	ENSMUST00000033741	CGCGGTGGTGGTACGACATGAGAGATTAGAGATGAGTTGGAAGAGTCCAGGTCGGGGACACCTGAAGTGGTATGTGGAGGGATTGAAGGATAAGCGCAACTAGGACGGACAA
Bgn	ENSMUST00000033741	CGCGGTGGTGGTACGACATGAAGAGTGAGTAGTAGTGGAGTAGTTGCCCCATATTTGTTTGTGGAGGGACTAGGGTTGATTAGTGGTAGAAAAGCGCAACTAGGACGGACAA
Bgn	ENSMUST00000033741	CGCGGTGGTGGTACGACATGATGTGGAGGGATTGAAGGATATGGAGTGCAGATAGACAACCTGGAGGAGCTAAGAGTGAGTAGTAGTGGAGTAGCGCAACTAGGACGGACAA
Bgn	ENSMUST00000033741	CGCGGTGGTGGTACGACATGAAGAGTGAGTAGTAGTGGAGTGAAATATGACCTAGGTCCAGAGATGGAAGGAGAGATTAGAGATGAGTTGGAAGCGCAACTAGGACGGACAA
Bgn	ENSMUST00000033741	CGCGGTGGTGGTACGACATGAGGGTTGATTAGTGGTAGAAATTAAATTTCAAAGGTTGAGGGGAATGGGTGATGTGGAGGGATTGAAGGATAAGCGCAACTAGGACGGACAA
Bgn	ENSMUST00000033741	CGCGGTGGTGGTACGACATGAGAGATTAGAGATGAGTTGGAAGATCTTTGGGGATGCCAGTGAGCTTGGCCAGGGTTGATTAGTGGTAGAAAAGCGCAACTAGGACGGACAA
Bgn	ENSMUST00000033741	CGCGGTGGTGGTACGACATGAGAGATTAGAGATGAGTTGGATACCAAGACCAGGGCGTAGAGGTGCTGGAGATGTGGAGGGATTGAAGGATAAGCGCAACTAGGACGGACAA
Bgn	ENSMUST00000033741	CGCGGTGGTGGTACGACATGAGGGTTGATTAGTGGTAGAAACTGAAGTGGTGTCTGAACCTGAAGCCTCCTAAGAGTGAGTAGTAGTGGAGTAGCGCAACTAGGACGGACAA
Bgn	ENSMUST00000033741	CGCGGTGGTGGTACGACATGATGTGGAGGGATTGAAGGATATGGGGCAGATGATCCGTGTGTGTGTGTGTGAAGAGTGAGTAGTAGTGGAGTAGCGCAACTAGGACGGACAA
Bgn	ENSMUST00000033741	CGCGGTGGTGGTACGACATGAGAGATTAGAGATGAGTTGGACTGTACAGCTTGGAGTATCGAAGTAGGTCCAAGAGTGAGTAGTAGTGGAGTAGCGCAACTAGGACGGACAA
Bgn	ENSMUST00000033741	CGCGGTGGTGGTACGACATGATGTGGAGGGATTGAAGGATAGGCCTTCTCATGGATCTTGGAGATCTTATTAGGGTTGATTAGTGGTAGAAAAGCGCAACTAGGACGGACAA
Bgn	ENSMUST00000033741	CGCGGTGGTGGTACGACATGAGAGATTAGAGATGAGTTGGATTGTTGTTGTCCAAGTGAAGTTCCCTCAGGAGGGTTGATTAGTGGTAGAAAAGCGCAACTAGGACGGACAA
Bgn	ENSMUST00000033741	CGCGGTGGTGGTACGACATGAGAGATTAGAGATGAGTTGGAGGAGGAACACATGCCTGGATGGAACAATGGATGTGGAGGGATTGAAGGATAAGCGCAACTAGGACGGACAA
Bgn	ENSMUST00000033741	CGCGGTGGTGGTACGACATGAAGAGTGAGTAGTAGTGGAGTCTTCCTCCAGGGTTGGGGGGTCAAGTTCTGAGGGTTGATTAGTGGTAGAAAAGCGCAACTAGGACGGACAA
Bgn	ENSMUST00000033741	CGCGGTGGTGGTACGACATGATGTGGAGGGATTGAAGGATATTTGTTGTGGTCCAGGTGAAGTTCGTTCAGAAGAGTGAGTAGTAGTGGAGTAGCGCAACTAGGACGGACAA
Bgn	ENSMUST00000033741	CGCGGTGGTGGTACGACATGAGAGATTAGAGATGAGTTGGAACAGTCTTCAGACCCAAGTCAGAGCACTGAAAGAGTGAGTAGTAGTGGAGTAGCGCAACTAGGACGGACAA
Bgn	ENSMUST00000033741	CGCGGTGGTGGTACGACATGATGTGGAGGGATTGAAGGATACCAAGTGAAGTTCCCTCAGGGTAGGCAGAAAGGGTTGATTAGTGGTAGAAAAGCGCAACTAGGACGGACAA
Bgn	ENSMUST00000033741	CGCGGTGGTGGTACGACATGAGAGATTAGAGATGAGTTGGAAGGTGAAGTCCCAGAAACCCTTCTGCTCAAAGGGTTGATTAGTGGTAGAAAAGCGCAACTAGGACGGACAA
Bgn	ENSMUST00000033741	CGCGGTGGTGGTACGACATGAGAGATTAGAGATGAGTTGGAAGAGCACTGAACAACCCGCAGGTGGCAGTGATGTGGAGGGATTGAAGGATAAGCGCAACTAGGACGGACAA
Bgn	ENSMUST00000033741	CGCGGTGGTGGTACGACATGAAGAGTGAGTAGTAGTGGAGTCATGAGCAGCCCATCATCCAAGGTGAAGTCAGGGTTGATTAGTGGTAGAAAAGCGCAACTAGGACGGACAA
Bgn	ENSMUST00000033741	CGCGGTGGTGGTACGACATGATGTGGAGGGATTGAAGGATAAGGACACATGGCACTGAAGGTAGGTGTGACAAGAGTGAGTAGTAGTGGAGTAGCGCAACTAGGACGGACAA
Bgn	ENSMUST00000033741	CGCGGTGGTGGTACGACATGAGAGATTAGAGATGAGTTGGATCCAGGTGAAGTTCGTTCAGGGTCTCAGGGAAGAGTGAGTAGTAGTGGAGTAGCGCAACTAGGACGGACAA
Bgn	ENSMUST00000033741	CGCGGTGGTGGTACGACATGAGGGTTGATTAGTGGTAGAAAGAAAGATCCAGGAGTTAGTACAGCCAGGTTATGTGGAGGGATTGAAGGATAAGCGCAACTAGGACGGACAA
Bgn	ENSMUST00000033741	CGCGGTGGTGGTACGACATGAGGGTTGATTAGTGGTAGAAAGGTAGGGCAATCAGGAAGATAGTTGCCCCAAGAGATTAGAGATGAGTTGGAAGCGCAACTAGGACGGACAA
Bgn	ENSMUST00000033741	CGCGGTGGTGGTACGACATGATGTGGAGGGATTGAAGGATAGAAAGCAGCCTGGGGCAGATGATCCGTGTGAGAGATTAGAGATGAGTTGGAAGCGCAACTAGGACGGACAA
Bgn	ENSMUST00000033741	CGCGGTGGTGGTACGACATGAAGAGTGAGTAGTAGTGGAGTGTAGGCAGAAAACTCAGGCTCCCATTCTCAAGGGTTGATTAGTGGTAGAAAAGCGCAACTAGGACGGACAA
Bgn	ENSMUST00000033741	CGCGGTGGTGGTACGACATGAAGAGTGAGTAGTAGTGGAGTGAGCCCAGGAGAGCTGGAAGTCAGACATGAATGTGGAGGGATTGAAGGATAAGCGCAACTAGGACGGACAA
Bgn	ENSMUST00000033741	CGCGGTGGTGGTACGACATGAGAGATTAGAGATGAGTTGGAGAGTTTTTGCAGCTTCCGCAGAGGGCTAAAAAGAGTGAGTAGTAGTGGAGTAGCGCAACTAGGACGGACAA
Bgn	ENSMUST00000033741	CGCGGTGGTGGTACGACATGATGTGGAGGGATTGAAGGATACCAGAAACCCTTCTGCTCAAAGGGCAAGGCAGGGTTGATTAGTGGTAGAAAAGCGCAACTAGGACGGACAA
Bgn	ENSMUST00000033741	CGCGGTGGTGGTACGACATGAGGGTTGATTAGTGGTAGAAACTTGCTGGGTGCAACTGACCATCACCTCCTAGAGATTAGAGATGAGTTGGAAGCGCAACTAGGACGGACAA
Bgn	ENSMUST00000033741	CGCGGTGGTGGTACGACATGATGTGGAGGGATTGAAGGATAGGCAACCGAAAGGACACATGGCACTGAAGGAGAGATTAGAGATGAGTTGGAAGCGCAACTAGGACGGACAA
Bgn	ENSMUST00000033741	CGCGGTGGTGGTACGACATGAGGGTTGATTAGTGGTAGAAATTCTGGGCCTCCACCTTCCAGCTTCCTCCAAAGAGTGAGTAGTAGTGGAGTAGCGCAACTAGGACGGACAA
Bgn	ENSMUST00000033741	CGCGGTGGTGGTACGACATGATGTGGAGGGATTGAAGGATACTAGGTCCAGAGATGGAAGGGGACAGGTCAAAGAGTGAGTAGTAGTGGAGTAGCGCAACTAGGACGGACAA
Bgn	ENSMUST00000033741	CGCGGTGGTGGTACGACATGAAGAGTGAGTAGTAGTGGAGTAGTCATTGATGCCCACCTTGGTGATGTTGTAGAGATTAGAGATGAGTTGGAAGCGCAACTAGGACGGACAA
Bgn	ENSMUST00000033741	CGCGGTGGTGGTACGACATGAGGGTTGATTAGTGGTAGAAATGTGTGTTGTCAGAGAGAGACAGATACAAAATGTGGAGGGATTGAAGGATAAGCGCAACTAGGACGGACAA
Bgn	ENSMUST00000033741	CGCGGTGGTGGTACGACATGAGGGTTGATTAGTGGTAGAAACCATCATCCAAGGTGAAGTCCCAGAAACCCAGAGATTAGAGATGAGTTGGAAGCGCAACTAGGACGGACAA
Bgn	ENSMUST00000033741	CGCGGTGGTGGTACGACATGATGTGGAGGGATTGAAGGATAGCAGTGAGTTAATATTGGGGAACAAAGGTGAGAGATTAGAGATGAGTTGGAAGCGCAACTAGGACGGACAA
Bgn	ENSMUST00000033741	CGCGGTGGTGGTACGACATGAAGAGTGAGTAGTAGTGGAGTTCAGAAATGTCATTGTTCTGCAGGTCTAGCAGGGTTGATTAGTGGTAGAAAAGCGCAACTAGGACGGACAA
Bgn	ENSMUST00000033741	CGCGGTGGTGGTACGACATGAAGAGTGAGTAGTAGTGGAGTTCTGAGATGCGCAGGTAATTGAGCTTCAGGATGTGGAGGGATTGAAGGATAAGCGCAACTAGGACGGACAA
Blnk	ENSMUST00000117695	CGCGGTGGTGGTACGACATGATGTGATGGAAGTTAGAGGGTGGATCGATTATCTACATACTCGCCCCTCGTATGGGAGGATTGAGATGAGTTAGCGCAACTAGGACGGACAA
Blnk	ENSMUST00000117695	CGCGGTGGTGGTACGACATGATGTGATGGAAGTTAGAGGGTTGGCAAGGGTACAGGCTTTTGATGGACAGGAAGTGTGGGATTGATGAGATAAGCGCAACTAGGACGGACAA
Blnk	ENSMUST00000117695	CGCGGTGGTGGTACGACATGAAGTTGAGGTGGGAGAGTATTGCTTACCGAGCAGTTCAGCCTCCTGGTCTGATGTGATGGAAGTTAGAGGGTAGCGCAACTAGGACGGACAA
Blnk	ENSMUST00000117695	CGCGGTGGTGGTACGACATGAAGTGTGGGATTGATGAGATAAACCAGGGGGTTGTGCTGGTGACTGTTGACATGGGAGGATTGAGATGAGTTAGCGCAACTAGGACGGACAA
Blnk	ENSMUST00000117695	CGCGGTGGTGGTACGACATGAAGTTGAGGTGGGAGAGTATTTACAGTGTCTTGTCTGTGACTAGACCCTCGATGGGAGGATTGAGATGAGTTAGCGCAACTAGGACGGACAA
Blnk	ENSMUST00000117695	CGCGGTGGTGGTACGACATGAAGTGTGGGATTGATGAGATACTGGTGACTGTACAGTGTCTTGTCTGTGACAAGTTGAGGTGGGAGAGTATTAGCGCAACTAGGACGGACAA
Blnk	ENSMUST00000117695	CGCGGTGGTGGTACGACATGATGTGATGGAAGTTAGAGGGTTCATAGGAATCGTCGCCCGTCTCCTCGGCAATGGGAGGATTGAGATGAGTTAGCGCAACTAGGACGGACAA
Blnk	ENSMUST00000117695	CGCGGTGGTGGTACGACATGAAGTGTGGGATTGATGAGATAGTCGAAGTCATCTGACCACTGCTCCTCTTCATGTGATGGAAGTTAGAGGGTAGCGCAACTAGGACGGACAA
Blnk	ENSMUST00000117695	CGCGGTGGTGGTACGACATGAAGTTGAGGTGGGAGAGTATTTGTCTGTGACTAGACCCTCGGTGGCGCTCAATGTGATGGAAGTTAGAGGGTAGCGCAACTAGGACGGACAA
Blnk	ENSMUST00000117695	CGCGGTGGTGGTACGACATGAAGTGTGGGATTGATGAGATAGCTGAGGAGTCATAGCCAGAATATGATGTTATGGGAGGATTGAGATGAGTTAGCGCAACTAGGACGGACAA
Blnk	ENSMUST00000117695	CGCGGTGGTGGTACGACATGATGGGAGGATTGAGATGAGTTTGGAATCATGGCCAGAGCTCTTCCGAATAAAAGTTGAGGTGGGAGAGTATTAGCGCAACTAGGACGGACAA
Blnk	ENSMUST00000117695	CGCGGTGGTGGTACGACATGAAGTGTGGGATTGATGAGATAGGGACCACATAATCAGCCTCATCCTCAAGGAAGTTGAGGTGGGAGAGTATTAGCGCAACTAGGACGGACAA
Blnk	ENSMUST00000117695	CGCGGTGGTGGTACGACATGATGTGATGGAAGTTAGAGGGTGACTTCCTGGGGAGCAGCATGGTAAGGCTCATGGGAGGATTGAGATGAGTTAGCGCAACTAGGACGGACAA
Blnk	ENSMUST00000117695	CGCGGTGGTGGTACGACATGATGTGATGGAAGTTAGAGGGTTGGCGCTCAGCAGGAACAGGCTTTTCTTCAAAGTGTGGGATTGATGAGATAAGCGCAACTAGGACGGACAA
Blnk	ENSMUST00000117695	CGCGGTGGTGGTACGACATGATGTGATGGAAGTTAGAGGGTCATGGACCATCTTTTGAAGCTGTCTCAGCTAAGTTGAGGTGGGAGAGTATTAGCGCAACTAGGACGGACAA
Blnk	ENSMUST00000117695	CGCGGTGGTGGTACGACATGATGGGAGGATTGAGATGAGTTAGTCCCAGACCCCACTGTTTCGACCTGCGAAAGTGTGGGATTGATGAGATAAGCGCAACTAGGACGGACAA
Blnk	ENSMUST00000117695	CGCGGTGGTGGTACGACATGATGGGAGGATTGAGATGAGTTTGACTTCGTCAGGTCAGGTGATAGAAAAGCAAGTTGAGGTGGGAGAGTATTAGCGCAACTAGGACGGACAA
Blnk	ENSMUST00000117695	CGCGGTGGTGGTACGACATGAAGTGTGGGATTGATGAGATATTTCATCGTTATCTTCCACAGGGACCACATAAGTTGAGGTGGGAGAGTATTAGCGCAACTAGGACGGACAA
Blnk	ENSMUST00000117695	CGCGGTGGTGGTACGACATGATGGGAGGATTGAGATGAGTTTCTGACCACTGCTCCTCTTCATCTGCAGGGATGTGATGGAAGTTAGAGGGTAGCGCAACTAGGACGGACAA
Blnk	ENSMUST00000117695	CGCGGTGGTGGTACGACATGAAGTGTGGGATTGATGAGATATCGAGGAACACTTGGAGGGCCTTTGACTTTATGTGATGGAAGTTAGAGGGTAGCGCAACTAGGACGGACAA
Blnk	ENSMUST00000117695	CGCGGTGGTGGTACGACATGAAGTTGAGGTGGGAGAGTATTACATACATCTCGGAGTCCGAATGTTCATCTATGTGATGGAAGTTAGAGGGTAGCGCAACTAGGACGGACAA
Blnk	ENSMUST00000117695	CGCGGTGGTGGTACGACATGAAGTGTGGGATTGATGAGATATTGAGAGAGGATGTGTCGCTGTCCAGGGGGATGGGAGGATTGAGATGAGTTAGCGCAACTAGGACGGACAA
Blnk	ENSMUST00000117695	CGCGGTGGTGGTACGACATGAAGTTGAGGTGGGAGAGTATTTGTCTGGAACCGTGGTATCGTTATGAAACCATGGGAGGATTGAGATGAGTTAGCGCAACTAGGACGGACAA
Blnk	ENSMUST00000117695	CGCGGTGGTGGTACGACATGAAGTGTGGGATTGATGAGATAGATCTGTGCAAGGCCTCTTCAGCAGACTTGAAGTTGAGGTGGGAGAGTATTAGCGCAACTAGGACGGACAA
Blnk	ENSMUST00000117695	CGCGGTGGTGGTACGACATGATGGGAGGATTGAGATGAGTTCAAACGTCGAATTAAATGGGAAGCTGTGGAATGTGATGGAAGTTAGAGGGTAGCGCAACTAGGACGGACAA
Blnk	ENSMUST00000117695	CGCGGTGGTGGTACGACATGATGTGATGGAAGTTAGAGGGTCTTGGAGGGCCTTTGACTTTTAGCTTTTTTAAGTGTGGGATTGATGAGATAAGCGCAACTAGGACGGACAA
Blnk	ENSMUST00000117695	CGCGGTGGTGGTACGACATGAAGTTGAGGTGGGAGAGTATTTCTGGATTTTCATAGTCACTGTCGAAGTCAATGTGATGGAAGTTAGAGGGTAGCGCAACTAGGACGGACAA
Blnk	ENSMUST00000117695	CGCGGTGGTGGTACGACATGATGGGAGGATTGAGATGAGTTTCTTTGGGCTTGGGGGGGACTTGAGGCTTCAAGTGTGGGATTGATGAGATAAGCGCAACTAGGACGGACAA
Blnk	ENSMUST00000117695	CGCGGTGGTGGTACGACATGATGGGAGGATTGAGATGAGTTACAGGCTTTTGATGGACAGGTTTCTGGGTGAAGTTGAGGTGGGAGAGTATTAGCGCAACTAGGACGGACAA
Blnk	ENSMUST00000117695	CGCGGTGGTGGTACGACATGAAGTGTGGGATTGATGAGATACCGTCTCCTCGGCAGGCATCACATACATCTAAGTTGAGGTGGGAGAGTATTAGCGCAACTAGGACGGACAA
Blnk	ENSMUST00000117695	CGCGGTGGTGGTACGACATGATGTGATGGAAGTTAGAGGGTATAGAAAAGCTCGTGTGAACGCCCTAGGAAATGGGAGGATTGAGATGAGTTAGCGCAACTAGGACGGACAA
Blnk	ENSMUST00000117695	CGCGGTGGTGGTACGACATGATGTGATGGAAGTTAGAGGGTCAGTTCAGCCTCCTGGTCTGCAAACGTCGAAAGTGTGGGATTGATGAGATAAGCGCAACTAGGACGGACAA
Blnk	ENSMUST00000117695	CGCGGTGGTGGTACGACATGAAGTTGAGGTGGGAGAGTATTAAGCTGTGGAACGGTCCATCTGCAGCTGGGATGTGATGGAAGTTAGAGGGTAGCGCAACTAGGACGGACAA
Blnk	ENSMUST00000117695	CGCGGTGGTGGTACGACATGAAGTGTGGGATTGATGAGATAGGAGGAAACACTGGTGACTGTACAGTGTCTATGGGAGGATTGAGATGAGTTAGCGCAACTAGGACGGACAA
Blnk	ENSMUST00000117695	CGCGGTGGTGGTACGACATGAAGTTGAGGTGGGAGAGTATTGCATATTTCAGTCTCGTGGAATCTTTCGTGATGGGAGGATTGAGATGAGTTAGCGCAACTAGGACGGACAA
Blnk	ENSMUST00000117695	CGCGGTGGTGGTACGACATGAAGTGTGGGATTGATGAGATAAGTATCATAGTAACCGAACCTCCCCAGCTAAAGTTGAGGTGGGAGAGTATTAGCGCAACTAGGACGGACAA
Blnk	ENSMUST00000117695	CGCGGTGGTGGTACGACATGATGTGATGGAAGTTAGAGGGTGTCCCTGGAGGCGACATGTGCTTTGAGGAAATGGGAGGATTGAGATGAGTTAGCGCAACTAGGACGGACAA
Blnk	ENSMUST00000117695	CGCGGTGGTGGTACGACATGATGTGATGGAAGTTAGAGGGTTGTAGCTGGCTTCTTCCCAGCCCGTGGTAGAAGTGTGGGATTGATGAGATAAGCGCAACTAGGACGGACAA
Blnk	ENSMUST00000117695	CGCGGTGGTGGTACGACATGATGTGATGGAAGTTAGAGGGTATCCTTGTTGGATCTGTGCAAGGCCTCTTCAAGTTGAGGTGGGAGAGTATTAGCGCAACTAGGACGGACAA
Blnk	ENSMUST00000117695	CGCGGTGGTGGTACGACATGATGGGAGGATTGAGATGAGTTAACCTTCACAGCATATTTCAGTCTCGTGGAAAGTGTGGGATTGATGAGATAAGCGCAACTAGGACGGACAA
Blnk	ENSMUST00000117695	CGCGGTGGTGGTACGACATGAAGTTGAGGTGGGAGAGTATTCAAACATTTGATGCATTCGGTAGGGGAGGAATGGGAGGATTGAGATGAGTTAGCGCAACTAGGACGGACAA
Blnk	ENSMUST00000117695	CGCGGTGGTGGTACGACATGAAGTGTGGGATTGATGAGATATCGTGTGAACGCCCTAGGAAGGAGTAGATTAAGTTGAGGTGGGAGAGTATTAGCGCAACTAGGACGGACAA
Blnk	ENSMUST00000117695	CGCGGTGGTGGTACGACATGATGTGATGGAAGTTAGAGGGTTCTACATACTCGCCCCTCGTGAAGGGCAGGATGGGAGGATTGAGATGAGTTAGCGCAACTAGGACGGACAA
Blnk	ENSMUST00000117695	CGCGGTGGTGGTACGACATGAAGTGTGGGATTGATGAGATATGGGGGGGACTTGAGGCTTCTGTAGAGAGTATGTGATGGAAGTTAGAGGGTAGCGCAACTAGGACGGACAA
Blnk	ENSMUST00000117695	CGCGGTGGTGGTACGACATGAAGTTGAGGTGGGAGAGTATTAAGTGTCTTGCTGAAGGGCGGAGAGTGCCGATGTGATGGAAGTTAGAGGGTAGCGCAACTAGGACGGACAA
Blnk	ENSMUST00000117695	CGCGGTGGTGGTACGACATGAAGTGTGGGATTGATGAGATACCCAAAGCATACTGTTTGGTTGCTTCAATAATGGGAGGATTGAGATGAGTTAGCGCAACTAGGACGGACAA
Blnk	ENSMUST00000117695	CGCGGTGGTGGTACGACATGATGGGAGGATTGAGATGAGTTCCTCAGTGGCTTCATTCATCTTTTCTCTCTAAGTTGAGGTGGGAGAGTATTAGCGCAACTAGGACGGACAA
Blnk	ENSMUST00000117695	CGCGGTGGTGGTACGACATGAAGTGTGGGATTGATGAGATACGTGGAATCTTTCGTGTTATTCTGACTGTCAAGTTGAGGTGGGAGAGTATTAGCGCAACTAGGACGGACAA
Blnk	ENSMUST00000117695	CGCGGTGGTGGTACGACATGATGGGAGGATTGAGATGAGTTCTGTCTAATGCGTAGTCCCTTCGAGGAACAATGTGATGGAAGTTAGAGGGTAGCGCAACTAGGACGGACAA
Blnk	ENSMUST00000117695	CGCGGTGGTGGTACGACATGAAGTGTGGGATTGATGAGATAACAGAGGACATGTCTGGAACCGTGGTATCGATGTGATGGAAGTTAGAGGGTAGCGCAACTAGGACGGACAA
Blnk	ENSMUST00000117695	CGCGGTGGTGGTACGACATGAAGTTGAGGTGGGAGAGTATTACTGTTTCGACCTGCGACAGTCCCTGGAGGATGTGATGGAAGTTAGAGGGTAGCGCAACTAGGACGGACAA
Blnk	ENSMUST00000117695	CGCGGTGGTGGTACGACATGAAGTGTGGGATTGATGAGATATAGGGGAGGAACGGGAGTAGTCTTAAGTGGATGGGAGGATTGAGATGAGTTAGCGCAACTAGGACGGACAA
Blnk	ENSMUST00000117695	CGCGGTGGTGGTACGACATGAAGTTGAGGTGGGAGAGTATTTACGGCTGCTTGGAATCATGGCCAGAGCTCATGGGAGGATTGAGATGAGTTAGCGCAACTAGGACGGACAA
Blnk	ENSMUST00000117695	CGCGGTGGTGGTACGACATGAAGTTGAGGTGGGAGAGTATTTTGAGGCTTCTGTAGAGAGTTGGGGGCTGGAAGTGTGGGATTGATGAGATAAGCGCAACTAGGACGGACAA
Blnk	ENSMUST00000117695	CGCGGTGGTGGTACGACATGATGGGAGGATTGAGATGAGTTTCCCCGCTTTTGGCAAGGGTACAGGCTTTTATGTGATGGAAGTTAGAGGGTAGCGCAACTAGGACGGACAA
Blnk	ENSMUST00000117695	CGCGGTGGTGGTACGACATGATGTGATGGAAGTTAGAGGGTTCTTAAGTGGTGTAGCTGGCTTCTTCCCAGAAGTGTGGGATTGATGAGATAAGCGCAACTAGGACGGACAA
Blnk	ENSMUST00000117695	CGCGGTGGTGGTACGACATGAAGTTGAGGTGGGAGAGTATTGCCCTAGGAAGGAGTAGATTCATTCATTCAATGTGATGGAAGTTAGAGGGTAGCGCAACTAGGACGGACAA
Blnk	ENSMUST00000117695	CGCGGTGGTGGTACGACATGATGGGAGGATTGAGATGAGTTTCAGCGGGAGGCGGTTCATAGGAATCGTCGAAGTGTGGGATTGATGAGATAAGCGCAACTAGGACGGACAA
Blnk	ENSMUST00000117695	CGCGGTGGTGGTACGACATGATGGGAGGATTGAGATGAGTTTCCTGGTCTGCAAACGTCGAATTAAATGGGAAGTTGAGGTGGGAGAGTATTAGCGCAACTAGGACGGACAA
Blnk	ENSMUST00000117695	CGCGGTGGTGGTACGACATGAAGTGTGGGATTGATGAGATAATCCTCAAGGAGGTCTTTGGGCTTGGGGGGAAGTTGAGGTGGGAGAGTATTAGCGCAACTAGGACGGACAA
Blnk	ENSMUST00000117695	CGCGGTGGTGGTACGACATGATGGGAGGATTGAGATGAGTTGCTCCTCTTCATCTGCAGGGCTGTCTAATGATGTGATGGAAGTTAGAGGGTAGCGCAACTAGGACGGACAA
Blnk	ENSMUST00000117695	CGCGGTGGTGGTACGACATGATGTGATGGAAGTTAGAGGGTGACTGTTGACGATTTCCACAACACTTCCGAAAGTGTGGGATTGATGAGATAAGCGCAACTAGGACGGACAA
Blnk	ENSMUST00000117695	CGCGGTGGTGGTACGACATGATGTGATGGAAGTTAGAGGGTTAACCGAACCTCCCCAGCTATGACTTCGTCAAGTTGAGGTGGGAGAGTATTAGCGCAACTAGGACGGACAA
Blnk	ENSMUST00000117695	CGCGGTGGTGGTACGACATGAAGTGTGGGATTGATGAGATATGTCAATAAGAACCAGGGGGTTGTGCTGGTATGGGAGGATTGAGATGAGTTAGCGCAACTAGGACGGACAA
Blnk	ENSMUST00000117695	CGCGGTGGTGGTACGACATGATGGGAGGATTGAGATGAGTTCATAGTCACTGTCGAAGTCATCTGACCACTAAGTTGAGGTGGGAGAGTATTAGCGCAACTAGGACGGACAA
Blnk	ENSMUST00000117695	CGCGGTGGTGGTACGACATGAAGTTGAGGTGGGAGAGTATTGCTGCTTTCTCTGGGATGGATATAGTTTTCAAGTGTGGGATTGATGAGATAAGCGCAACTAGGACGGACAA
Blnk	ENSMUST00000117695	CGCGGTGGTGGTACGACATGATGTGATGGAAGTTAGAGGGTCGTAGTCCCTTCGAGGAACACTTGGAGGGCATGGGAGGATTGAGATGAGTTAGCGCAACTAGGACGGACAA
Blnk	ENSMUST00000117695	CGCGGTGGTGGTACGACATGATGTGATGGAAGTTAGAGGGTATTCACGAAGCCTCAGTGGCTTCATTCATCAAGTGTGGGATTGATGAGATAAGCGCAACTAGGACGGACAA
Blnk	ENSMUST00000117695	CGCGGTGGTGGTACGACATGAAGTTGAGGTGGGAGAGTATTTGTCTCAGCTTCTGGCTGGCAGGGACAGTTATGTGATGGAAGTTAGAGGGTAGCGCAACTAGGACGGACAA
Blnk	ENSMUST00000117695	CGCGGTGGTGGTACGACATGAAGTGTGGGATTGATGAGATAGCCAGAGCTCTTCCGAATAAGAAACGATCCATGGGAGGATTGAGATGAGTTAGCGCAACTAGGACGGACAA
Blnk	ENSMUST00000117695	CGCGGTGGTGGTACGACATGATGGGAGGATTGAGATGAGTTGCGACATGTGCTTTGAGGAACTGTTTGGCTAAGTTGAGGTGGGAGAGTATTAGCGCAACTAGGACGGACAA
Blnk	ENSMUST00000117695	CGCGGTGGTGGTACGACATGAAGTGTGGGATTGATGAGATAGATGACTTGGAGTCCCAGACCCCACTGTTTAAGTTGAGGTGGGAGAGTATTAGCGCAACTAGGACGGACAA
Blnk	ENSMUST00000117695	CGCGGTGGTGGTACGACATGATGGGAGGATTGAGATGAGTTAACTAGGGTGTACGGCTGCTTGGAATCATGATGTGATGGAAGTTAGAGGGTAGCGCAACTAGGACGGACAA
Blnk	ENSMUST00000117695	CGCGGTGGTGGTACGACATGAAGTGTGGGATTGATGAGATAGCATACCAGGGCTTACCGAGCAGTTCAGCCATGTGATGGAAGTTAGAGGGTAGCGCAACTAGGACGGACAA
Blnk	ENSMUST00000117695	CGCGGTGGTGGTACGACATGATGTGATGGAAGTTAGAGGGTTCTGGCTGGCAGGGACAGTTATCTTATTCAAAGTTGAGGTGGGAGAGTATTAGCGCAACTAGGACGGACAA
Blnk	ENSMUST00000117695	CGCGGTGGTGGTACGACATGAAGTGTGGGATTGATGAGATAGGAGCAGCATGGTAAGGCTCTGGCCTCAAGATGGGAGGATTGAGATGAGTTAGCGCAACTAGGACGGACAA
Blnk	ENSMUST00000117695	CGCGGTGGTGGTACGACATGAAGTTGAGGTGGGAGAGTATTTTTCTGGGTGGGAGGAAACACTGGTGACTGATGGGAGGATTGAGATGAGTTAGCGCAACTAGGACGGACAA
Blnk	ENSMUST00000117695	CGCGGTGGTGGTACGACATGAAGTGTGGGATTGATGAGATATAAAGAACGCAACTAGGGTGTACGGCTGCTAAGTTGAGGTGGGAGAGTATTAGCGCAACTAGGACGGACAA
Blnk	ENSMUST00000117695	CGCGGTGGTGGTACGACATGATGGGAGGATTGAGATGAGTTACTCGCTTGTTAAAGAACGCAACTAGGGTGATGTGATGGAAGTTAGAGGGTAGCGCAACTAGGACGGACAA
Blnk	ENSMUST00000117695	CGCGGTGGTGGTACGACATGAAGTGTGGGATTGATGAGATAACCGTACAGGAATATTATACACTCGCTTGTATGTGATGGAAGTTAGAGGGTAGCGCAACTAGGACGGACAA
Blnk	ENSMUST00000117695	CGCGGTGGTGGTACGACATGAAGTTGAGGTGGGAGAGTATTGAAACGATCCATCCTTGTTGGATCTGTGCAATGTGATGGAAGTTAGAGGGTAGCGCAACTAGGACGGACAA
Blnk	ENSMUST00000117695	CGCGGTGGTGGTACGACATGATGGGAGGATTGAGATGAGTTTTTCGCTGAAGGCCAGCTGGGCTTACTGGGAAGTGTGGGATTGATGAGATAAGCGCAACTAGGACGGACAA
Blnk	ENSMUST00000117695	CGCGGTGGTGGTACGACATGATGGGAGGATTGAGATGAGTTCGTGGTATCGTTATGAAACCTTCACAGCATAAGTTGAGGTGGGAGAGTATTAGCGCAACTAGGACGGACAA
Blnk	ENSMUST00000117695	CGCGGTGGTGGTACGACATGAAGTGTGGGATTGATGAGATAGTTTGGTTGCTTCAATAAACCGTACAGGAAAAGTTGAGGTGGGAGAGTATTAGCGCAACTAGGACGGACAA
Blnk	ENSMUST00000117695	CGCGGTGGTGGTACGACATGATGTGATGGAAGTTAGAGGGTACACTTCCGAAGTACTCTTCACCATTTTTCATGGGAGGATTGAGATGAGTTAGCGCAACTAGGACGGACAA
Blnk	ENSMUST00000117695	CGCGGTGGTGGTACGACATGAAGTGTGGGATTGATGAGATAAGGCCTCTTCAGCAGACTTGCGGTCACAGGATGTGATGGAAGTTAGAGGGTAGCGCAACTAGGACGGACAA
Blnk	ENSMUST00000117695	CGCGGTGGTGGTACGACATGATGTGATGGAAGTTAGAGGGTTGGTTGATCTATTCACCATGGGAGCCTTCTAAGTTGAGGTGGGAGAGTATTAGCGCAACTAGGACGGACAA
Blnk	ENSMUST00000117695	CGCGGTGGTGGTACGACATGATGGGAGGATTGAGATGAGTTTCCCCAGCTATGACTTCGTCAGGTCAGGTGAAGTGTGGGATTGATGAGATAAGCGCAACTAGGACGGACAA
Blnk	ENSMUST00000117695	CGCGGTGGTGGTACGACATGATGGGAGGATTGAGATGAGTTTTGTGCTGGTGACTGTTGACGATTTCCACAAAGTTGAGGTGGGAGAGTATTAGCGCAACTAGGACGGACAA
Blnk	ENSMUST00000117695	CGCGGTGGTGGTACGACATGAAGTTGAGGTGGGAGAGTATTCGGAGTCCGAATGTTCATCTGGATTTTCATAAGTGTGGGATTGATGAGATAAGCGCAACTAGGACGGACAA
Blnk	ENSMUST00000117695	CGCGGTGGTGGTACGACATGATGGGAGGATTGAGATGAGTTTTCCGAATAAGAAACGATCCATCCTTGTTGATGTGATGGAAGTTAGAGGGTAGCGCAACTAGGACGGACAA
Blnk	ENSMUST00000117695	CGCGGTGGTGGTACGACATGATGTGATGGAAGTTAGAGGGTATCTTCCACAGGGACCACATAATCAGCCTCAAGTGTGGGATTGATGAGATAAGCGCAACTAGGACGGACAA
Bmpr1b	ENSMUST00000029948	CGCGGTGGTGGTACGACATGAGGGAGAATGAGGTGTAATGTAATCACAACAGCCATGATGTTTGATGACCTAGGGTTGATTAGTGGTAGAAAAGCGCAACTAGGACGGACAA
Bmpr1b	ENSMUST00000029948	CGCGGTGGTGGTACGACATGAGGGTTGATTAGTGGTAGAAAACACCAAACGAAATGTGCCAGCAAATTTCCATAGAGTTGATAGAGGGAGAAAGCGCAACTAGGACGGACAA
Bmpr1b	ENSMUST00000029948	CGCGGTGGTGGTACGACATGAGGGTTGATTAGTGGTAGAAAGAAACTAAATTGTGGCCCTGCAGTACCGTAAAGTTGAGGTGGGAGAGTATTAGCGCAACTAGGACGGACAA
Bmpr1b	ENSMUST00000029948	CGCGGTGGTGGTACGACATGATAGAGTTGATAGAGGGAGAAACAGTCTGAGGTGTGTCGGGCAGTAAGTTGAGGGAGAATGAGGTGTAATGTAGCGCAACTAGGACGGACAA
Bmpr1b	ENSMUST00000029948	CGCGGTGGTGGTACGACATGAAGTTGAGGTGGGAGAGTATTCATTGCCTGAAAGAGCTGCCTACCACACCCAGGGAGAATGAGGTGTAATGTAGCGCAACTAGGACGGACAA
Bmpr1b	ENSMUST00000029948	CGCGGTGGTGGTACGACATGATAGAGTTGATAGAGGGAGAACTAAACTGGCAAAATGCTTCCGTACGTGTTAAGTTGAGGTGGGAGAGTATTAGCGCAACTAGGACGGACAA
Bmpr1b	ENSMUST00000029948	CGCGGTGGTGGTACGACATGAGGGTTGATTAGTGGTAGAAAGAGTTTCTGAGATGGTGTAACCACCAAAACAGGGAGAATGAGGTGTAATGTAGCGCAACTAGGACGGACAA
Bmpr1b	ENSMUST00000029948	CGCGGTGGTGGTACGACATGATAGAGTTGATAGAGGGAGAATGATGACCTCATCAACTTTCCTCTGCTTATAGGGTTGATTAGTGGTAGAAAAGCGCAACTAGGACGGACAA
Bmpr1b	ENSMUST00000029948	CGCGGTGGTGGTACGACATGAAGTTGAGGTGGGAGAGTATTACACCGTGGTAATACTCCGGCGAGGTTCTCAGGGTTGATTAGTGGTAGAAAAGCGCAACTAGGACGGACAA
Bmpr1b	ENSMUST00000029948	CGCGGTGGTGGTACGACATGATAGAGTTGATAGAGGGAGAAAGCTTTCTGTTGGGGGAGTATAAAGAACGGAGGGAGAATGAGGTGTAATGTAGCGCAACTAGGACGGACAA
Bmpr1b	ENSMUST00000029948	CGCGGTGGTGGTACGACATGAGGGAGAATGAGGTGTAATGTCACACTTGCTCAGAGCTCTCTCTGCCCATGAAGTTGAGGTGGGAGAGTATTAGCGCAACTAGGACGGACAA
Bmpr1b	ENSMUST00000029948	CGCGGTGGTGGTACGACATGATAGAGTTGATAGAGGGAGAAAAGACCTCCCAGGACTGAATCACAAGATGTAAGTTGAGGTGGGAGAGTATTAGCGCAACTAGGACGGACAA
Bmpr1b	ENSMUST00000029948	CGCGGTGGTGGTACGACATGAGGGTTGATTAGTGGTAGAAAGCAATAAGGTTTTTCTTCCAGGCTCAGGTGAGGGAGAATGAGGTGTAATGTAGCGCAACTAGGACGGACAA
Bmpr1b	ENSMUST00000029948	CGCGGTGGTGGTACGACATGATAGAGTTGATAGAGGGAGAACATAGAAGGAACAAGCCATGTATCTGCTGCAGGGTTGATTAGTGGTAGAAAAGCGCAACTAGGACGGACAA
Bmpr1b	ENSMUST00000029948	CGCGGTGGTGGTACGACATGAGGGTTGATTAGTGGTAGAAACCTGTCTCTCTCTACTACATTCCTGACAGTAAGTTGAGGTGGGAGAGTATTAGCGCAACTAGGACGGACAA
Bmpr1b	ENSMUST00000029948	CGCGGTGGTGGTACGACATGATAGAGTTGATAGAGGGAGAATGGTCATATAAGTGATTTCGCACAGAGAGTAGGGAGAATGAGGTGTAATGTAGCGCAACTAGGACGGACAA
Bmpr1b	ENSMUST00000029948	CGCGGTGGTGGTACGACATGAGGGAGAATGAGGTGTAATGTGCTTTGCTGGTGTTTAATGCAAGGGGGGAGAAGTTGAGGTGGGAGAGTATTAGCGCAACTAGGACGGACAA
Bmpr1b	ENSMUST00000029948	CGCGGTGGTGGTACGACATGAAGTTGAGGTGGGAGAGTATTTCAAATTTCTCCCCGTTTTTCGCAGGAACCATAGAGTTGATAGAGGGAGAAAGCGCAACTAGGACGGACAA
Bmpr1b	ENSMUST00000029948	CGCGGTGGTGGTACGACATGAGGGTTGATTAGTGGTAGAAAGGCTCCGAAGAACCCACCAACACATAATCCAGGGAGAATGAGGTGTAATGTAGCGCAACTAGGACGGACAA
Bmpr1b	ENSMUST00000029948	CGCGGTGGTGGTACGACATGAGGGTTGATTAGTGGTAGAAATTCAAGTTCTCGCCACTGTTTTCTTCCTTGATAGAGTTGATAGAGGGAGAAAGCGCAACTAGGACGGACAA
Bmpr1b	ENSMUST00000029948	CGCGGTGGTGGTACGACATGAAGTTGAGGTGGGAGAGTATTGGATTACTGGAAAGTCAACAGGTAGTCCTTAGGGTTGATTAGTGGTAGAAAAGCGCAACTAGGACGGACAA
Bmpr1b	ENSMUST00000029948	CGCGGTGGTGGTACGACATGATAGAGTTGATAGAGGGAGAAAGGGCTGGCCCAAACAGTCTGAGGTGTGTCAGGGAGAATGAGGTGTAATGTAGCGCAACTAGGACGGACAA
Bmpr1b	ENSMUST00000029948	CGCGGTGGTGGTACGACATGAAGTTGAGGTGGGAGAGTATTGGGGAGAATGACACCATTTTATTGAGGGAAAGGGAGAATGAGGTGTAATGTAGCGCAACTAGGACGGACAA
Bmpr1b	ENSMUST00000029948	CGCGGTGGTGGTACGACATGAAGTTGAGGTGGGAGAGTATTAATGTACCCACTAAACTGGCAAAATGCTTCATAGAGTTGATAGAGGGAGAAAGCGCAACTAGGACGGACAA
Bmpr1b	ENSMUST00000029948	CGCGGTGGTGGTACGACATGAGGGAGAATGAGGTGTAATGTGCCCCCTGGAGGAATCTGGGAGGAATGTCAAGGGTTGATTAGTGGTAGAAAAGCGCAACTAGGACGGACAA
Bmpr1b	ENSMUST00000029948	CGCGGTGGTGGTACGACATGAGGGTTGATTAGTGGTAGAAAAATTTTTCCTAAGGTCTCCATCTTTCACGCATAGAGTTGATAGAGGGAGAAAGCGCAACTAGGACGGACAA
Bmpr1b	ENSMUST00000029948	CGCGGTGGTGGTACGACATGAAGTTGAGGTGGGAGAGTATTACTGCCATACTTAGACAGGAATAAATGGGAAGGGTTGATTAGTGGTAGAAAAGCGCAACTAGGACGGACAA
Bmpr1b	ENSMUST00000029948	CGCGGTGGTGGTACGACATGATAGAGTTGATAGAGGGAGAATACAGTTTGACCCAAGAGGTCCCCACAACCAGGGAGAATGAGGTGTAATGTAGCGCAACTAGGACGGACAA
Bmpr1b	ENSMUST00000029948	CGCGGTGGTGGTACGACATGAGGGAGAATGAGGTGTAATGTAAGGCGCTTCGATGGCTTAGCTTGCACTGAAAGTTGAGGTGGGAGAGTATTAGCGCAACTAGGACGGACAA
Bmpr1b	ENSMUST00000029948	CGCGGTGGTGGTACGACATGAAGTTGAGGTGGGAGAGTATTGGGTGCGCTGCCTGAGTCATACACACTGTTATAGAGTTGATAGAGGGAGAAAGCGCAACTAGGACGGACAA
Bmpr1b	ENSMUST00000029948	CGCGGTGGTGGTACGACATGAGGGTTGATTAGTGGTAGAAATTCTAGGAGAAATCACAACAGCCATGATGTAGGGAGAATGAGGTGTAATGTAGCGCAACTAGGACGGACAA
Bmpr1b	ENSMUST00000029948	CGCGGTGGTGGTACGACATGAGGGTTGATTAGTGGTAGAAATCTTAGCAGCTCATGAGAAAGCTTTGCTGGATAGAGTTGATAGAGGGAGAAAGCGCAACTAGGACGGACAA
Bmpr1b	ENSMUST00000029948	CGCGGTGGTGGTACGACATGAGGGTTGATTAGTGGTAGAAATCATGAGAAAGCTTTGCTGGTGTTTAATGCAAGTTGAGGTGGGAGAGTATTAGCGCAACTAGGACGGACAA
Bmpr1b	ENSMUST00000029948	CGCGGTGGTGGTACGACATGAGGGAGAATGAGGTGTAATGTCCCCGATAGAACACAAATGAGTCTTGTTTTATAGAGTTGATAGAGGGAGAAAGCGCAACTAGGACGGACAA
Bmpr1b	ENSMUST00000029948	CGCGGTGGTGGTACGACATGAGGGAGAATGAGGTGTAATGTGGGGGACTTGTATGCGTGCGCATTGACTCTAAGTTGAGGTGGGAGAGTATTAGCGCAACTAGGACGGACAA
Bmpr1b	ENSMUST00000029948	CGCGGTGGTGGTACGACATGAAGTTGAGGTGGGAGAGTATTGACTTGTGAGCCTGGACCACACACCAAACGATAGAGTTGATAGAGGGAGAAAGCGCAACTAGGACGGACAA
Bmpr1b	ENSMUST00000029948	CGCGGTGGTGGTACGACATGAGGGAGAATGAGGTGTAATGTTTGCTCTCTTGTCATAGCTCAGCGCCAAATAGGGTTGATTAGTGGTAGAAAAGCGCAACTAGGACGGACAA
Bmpr1b	ENSMUST00000029948	CGCGGTGGTGGTACGACATGAGGGTTGATTAGTGGTAGAAACTTATGGCCGGGTTGCTCCTTTAACTTTTTATAGAGTTGATAGAGGGAGAAAGCGCAACTAGGACGGACAA
Bmpr1b	ENSMUST00000029948	CGCGGTGGTGGTACGACATGAGGGTTGATTAGTGGTAGAAATCCCCTAAGAAGCTTTCTGTTGGGGGAGTAAAGTTGAGGTGGGAGAGTATTAGCGCAACTAGGACGGACAA
Bmpr1b	ENSMUST00000029948	CGCGGTGGTGGTACGACATGAGGGAGAATGAGGTGTAATGTGGTTGTGATTCAGCCGAAGTTAACCTGACAATAGAGTTGATAGAGGGAGAAAGCGCAACTAGGACGGACAA
Bmpr1b	ENSMUST00000029948	CGCGGTGGTGGTACGACATGAAGTTGAGGTGGGAGAGTATTTCAACAGGTAGTCCTTAACAGCTTAGTTGTAGGGAGAATGAGGTGTAATGTAGCGCAACTAGGACGGACAA
Bmpr1b	ENSMUST00000029948	CGCGGTGGTGGTACGACATGAAGTTGAGGTGGGAGAGTATTCGCACAGAGAGTCAAAAGTTAAGACCTCCCATAGAGTTGATAGAGGGAGAAAGCGCAACTAGGACGGACAA
Bmpr1b	ENSMUST00000029948	CGCGGTGGTGGTACGACATGAGGGAGAATGAGGTGTAATGTGATGGTGTAACCACCAAAACATGTTCAAGTAGGGTTGATTAGTGGTAGAAAAGCGCAACTAGGACGGACAA
Bmpr1b	ENSMUST00000029948	CGCGGTGGTGGTACGACATGAGGGTTGATTAGTGGTAGAAAATGGGACTGGGAGTTTCTGAGATGGTGTAAATAGAGTTGATAGAGGGAGAAAGCGCAACTAGGACGGACAA
Bmpr1b	ENSMUST00000029948	CGCGGTGGTGGTACGACATGAGGGTTGATTAGTGGTAGAAAACTCTGGCTGAAGCTGCAGGAGGAGTCCAAAAGTTGAGGTGGGAGAGTATTAGCGCAACTAGGACGGACAA
Bmpr1b	ENSMUST00000029948	CGCGGTGGTGGTACGACATGATAGAGTTGATAGAGGGAGAAAGTTGTACCTAAGGTGTGAAATGTCCATGTAGGGAGAATGAGGTGTAATGTAGCGCAACTAGGACGGACAA
Bmpr1b	ENSMUST00000029948	CGCGGTGGTGGTACGACATGAAGTTGAGGTGGGAGAGTATTAACGTCTACTCCAGAAAAGGGGTAAAACATAGGGAGAATGAGGTGTAATGTAGCGCAACTAGGACGGACAA
Bmpr1b	ENSMUST00000029948	CGCGGTGGTGGTACGACATGATAGAGTTGATAGAGGGAGAATGTATCATTTTTGACACAGCCCCTTTCCTTAAGTTGAGGTGGGAGAGTATTAGCGCAACTAGGACGGACAA
Bmpr1b	ENSMUST00000029948	CGCGGTGGTGGTACGACATGAGGGAGAATGAGGTGTAATGTACTCCAGGTACAGCGCAAAGACACTGAGCTAGGGTTGATTAGTGGTAGAAAAGCGCAACTAGGACGGACAA
Bmpr1b	ENSMUST00000029948	CGCGGTGGTGGTACGACATGAGGGTTGATTAGTGGTAGAAACCCCGTTTTTCGCAGGAACCCTAGAAATCTATAGAGTTGATAGAGGGAGAAAGCGCAACTAGGACGGACAA
Bmpr1b	ENSMUST00000029948	CGCGGTGGTGGTACGACATGAGGGTTGATTAGTGGTAGAAATGTGAAATGTCCATGTAAGAGGTCCATACCAAGTTGAGGTGGGAGAGTATTAGCGCAACTAGGACGGACAA
Bmpr1b	ENSMUST00000029948	CGCGGTGGTGGTACGACATGATAGAGTTGATAGAGGGAGAAGGCTGTTCTGTTTTCTAGAGTGCAAGAGTAAGGGAGAATGAGGTGTAATGTAGCGCAACTAGGACGGACAA
Bmpr1b	ENSMUST00000029948	CGCGGTGGTGGTACGACATGAAGTTGAGGTGGGAGAGTATTATTAACCTGACAGATCAGATGCTTCCTCTCAGGGAGAATGAGGTGTAATGTAGCGCAACTAGGACGGACAA
Bmpr1b	ENSMUST00000029948	CGCGGTGGTGGTACGACATGAAGTTGAGGTGGGAGAGTATTCTCATTTCTCATGCAGCTGTCAATTTTTCCATAGAGTTGATAGAGGGAGAAAGCGCAACTAGGACGGACAA
Bmpr1b	ENSMUST00000029948	CGCGGTGGTGGTACGACATGAGGGAGAATGAGGTGTAATGTCAGAGGGATGCTTTTCTTTACAGTTTTCCTAGGGTTGATTAGTGGTAGAAAAGCGCAACTAGGACGGACAA
Bmpr1b	ENSMUST00000029948	CGCGGTGGTGGTACGACATGATAGAGTTGATAGAGGGAGAACTGTGCCGTGCACACTTCTTTCCTGGGCTGAGGGTTGATTAGTGGTAGAAAAGCGCAACTAGGACGGACAA
Bmpr1b	ENSMUST00000029948	CGCGGTGGTGGTACGACATGAGGGTTGATTAGTGGTAGAAACACAAGATGTTTTGCGTACGTGCTATACTAAAGTTGAGGTGGGAGAGTATTAGCGCAACTAGGACGGACAA
Bmpr1b	ENSMUST00000029948	CGCGGTGGTGGTACGACATGAGGGAGAATGAGGTGTAATGTTGCAGCTGTCAATTTTTCCTAAGGTCTCCAATAGAGTTGATAGAGGGAGAAAGCGCAACTAGGACGGACAA
Bmpr1b	ENSMUST00000029948	CGCGGTGGTGGTACGACATGAAGTTGAGGTGGGAGAGTATTTGGCACGTCTTCCTTATAATACACGCCCAAAGGGAGAATGAGGTGTAATGTAGCGCAACTAGGACGGACAA
Bmpr1b	ENSMUST00000029948	CGCGGTGGTGGTACGACATGATAGAGTTGATAGAGGGAGAAAGCGCCAAATGGTTGTGATTCAGCCGAAGTAAGTTGAGGTGGGAGAGTATTAGCGCAACTAGGACGGACAA
Bmpr1b	ENSMUST00000029948	CGCGGTGGTGGTACGACATGAGGGTTGATTAGTGGTAGAAAGTGTAGGGACATTAACCTGACAGATCAGATAGGGAGAATGAGGTGTAATGTAGCGCAACTAGGACGGACAA
Bmpr1b	ENSMUST00000029948	CGCGGTGGTGGTACGACATGATAGAGTTGATAGAGGGAGAACACATAATCCTACCAGTGACACCAACCCTTAGGGTTGATTAGTGGTAGAAAAGCGCAACTAGGACGGACAA
Bmpr1b	ENSMUST00000029948	CGCGGTGGTGGTACGACATGAGGGTTGATTAGTGGTAGAAACATTTGTTTCACTCTGGCTGAAGCTGCAGGAAGTTGAGGTGGGAGAGTATTAGCGCAACTAGGACGGACAA
Bmpr1b	ENSMUST00000029948	CGCGGTGGTGGTACGACATGAGGGAGAATGAGGTGTAATGTCTATGAGCACAAAAGTAGGCACATGTCGATATAGAGTTGATAGAGGGAGAAAGCGCAACTAGGACGGACAA
Bmpr1b	ENSMUST00000029948	CGCGGTGGTGGTACGACATGAAGTTGAGGTGGGAGAGTATTAAGAGCTGCCTACCACACCCAGGAGCAGGAAGGGAGAATGAGGTGTAATGTAGCGCAACTAGGACGGACAA
Bmpr1b	ENSMUST00000029948	CGCGGTGGTGGTACGACATGATAGAGTTGATAGAGGGAGAAACATACTAGAGTTGTGCCAGACTCCAGAATAAGTTGAGGTGGGAGAGTATTAGCGCAACTAGGACGGACAA
Bmpr1b	ENSMUST00000029948	CGCGGTGGTGGTACGACATGAGGGTTGATTAGTGGTAGAAAATGCTCAAAATTCAAGTTCTCGCCACTGTTAGGGAGAATGAGGTGTAATGTAGCGCAACTAGGACGGACAA
Bmpr1b	ENSMUST00000029948	CGCGGTGGTGGTACGACATGATAGAGTTGATAGAGGGAGAAACCAACCCTTCATTTGTTTCACTCTGGCTGAGGGTTGATTAGTGGTAGAAAAGCGCAACTAGGACGGACAA
Bmpr1b	ENSMUST00000029948	CGCGGTGGTGGTACGACATGAGGGTTGATTAGTGGTAGAAATTGACACAGCCCCTTTCCTTTCCACTCTTTAAGTTGAGGTGGGAGAGTATTAGCGCAACTAGGACGGACAA
Bmpr1b	ENSMUST00000029948	CGCGGTGGTGGTACGACATGAGGGAGAATGAGGTGTAATGTAAAATGCTTCCGTACGTGTTTACAGATGGAATAGAGTTGATAGAGGGAGAAAGCGCAACTAGGACGGACAA
Bmpr1b	ENSMUST00000029948	CGCGGTGGTGGTACGACATGAGGGAGAATGAGGTGTAATGTCGCCACTGTTTTCTTCCTTGCCTGGCTCTCAAGTTGAGGTGGGAGAGTATTAGCGCAACTAGGACGGACAA
Bmpr1b	ENSMUST00000029948	CGCGGTGGTGGTACGACATGAAGTTGAGGTGGGAGAGTATTCCATGTAAGAGGTCCATACCAGACCCATATATAGAGTTGATAGAGGGAGAAAGCGCAACTAGGACGGACAA
Bmpr1b	ENSMUST00000029948	CGCGGTGGTGGTACGACATGAGGGTTGATTAGTGGTAGAAAGTGTCACTGAACACCGTGGTAATACTCCGGAGGGAGAATGAGGTGTAATGTAGCGCAACTAGGACGGACAA
Bmpr1b	ENSMUST00000029948	CGCGGTGGTGGTACGACATGATAGAGTTGATAGAGGGAGAAACATGTCGATTCTTAGCAGCTCATGAGAAAAGGGTTGATTAGTGGTAGAAAAGCGCAACTAGGACGGACAA
Bmpr1b	ENSMUST00000029948	CGCGGTGGTGGTACGACATGAAGTTGAGGTGGGAGAGTATTTCCTGGGCTGCTGTGATGGGTTCTTATGCAAGGGTTGATTAGTGGTAGAAAAGCGCAACTAGGACGGACAA
Bmpr1b	ENSMUST00000029948	CGCGGTGGTGGTACGACATGATAGAGTTGATAGAGGGAGAACATCAACAGCTTCCTCACAAAACATTCTGAAGGGAGAATGAGGTGTAATGTAGCGCAACTAGGACGGACAA
Bmpr1b	ENSMUST00000029948	CGCGGTGGTGGTACGACATGAGGGAGAATGAGGTGTAATGTCCTGAGTCATACACACTGTTTAACTGCTTTAAGTTGAGGTGGGAGAGTATTAGCGCAACTAGGACGGACAA
Bmpr1b	ENSMUST00000029948	CGCGGTGGTGGTACGACATGATAGAGTTGATAGAGGGAGAACAGAGCTCTCTCTGCCCATGGCACAGGTCTAAGTTGAGGTGGGAGAGTATTAGCGCAACTAGGACGGACAA
Bmpr1b	ENSMUST00000029948	CGCGGTGGTGGTACGACATGAGGGTTGATTAGTGGTAGAAAGCAAATAAGCAGTTGATTTTCCCCAAAGCAAGGGAGAATGAGGTGTAATGTAGCGCAACTAGGACGGACAA
Bmpr1b	ENSMUST00000029948	CGCGGTGGTGGTACGACATGAGGGTTGATTAGTGGTAGAAAAGGAATGTCACTTTCTAAGGCATAGGAAGTATAGAGTTGATAGAGGGAGAAAGCGCAACTAGGACGGACAA
Bmpr1b	ENSMUST00000029948	CGCGGTGGTGGTACGACATGAGGGTTGATTAGTGGTAGAAAAAAACATTCCCTCATTTCTCATGCAGCTGTAAGTTGAGGTGGGAGAGTATTAGCGCAACTAGGACGGACAA
Bmpr1b	ENSMUST00000029948	CGCGGTGGTGGTACGACATGATAGAGTTGATAGAGGGAGAAAGGACTGAATCACAAGATGTTTTGCGTACGAGGGAGAATGAGGTGTAATGTAGCGCAACTAGGACGGACAA
Bmpr1b	ENSMUST00000029948	CGCGGTGGTGGTACGACATGAAGTTGAGGTGGGAGAGTATTGGATTCCTTCAGGGGAGAGAAGTTAGAAGAAGGGAGAATGAGGTGTAATGTAGCGCAACTAGGACGGACAA
Bmpr1b	ENSMUST00000029948	CGCGGTGGTGGTACGACATGAAGTTGAGGTGGGAGAGTATTGAGCAGGAGTGGCTCCGAAGAACCCACCAAATAGAGTTGATAGAGGGAGAAAGCGCAACTAGGACGGACAA
Bmpr1b	ENSMUST00000029948	CGCGGTGGTGGTACGACATGAGGGTTGATTAGTGGTAGAAAGGAATCTGGGAGGAATGTCACTTTCTAAGGAGGGAGAATGAGGTGTAATGTAGCGCAACTAGGACGGACAA
Bmpr1b	ENSMUST00000029948	CGCGGTGGTGGTACGACATGAGGGTTGATTAGTGGTAGAAAAAGTGTGATGAATCTGGTTGGCCTGAGGAAATAGAGTTGATAGAGGGAGAAAGCGCAACTAGGACGGACAA
Bmpr1b	ENSMUST00000029948	CGCGGTGGTGGTACGACATGAAGTTGAGGTGGGAGAGTATTGGGAGTTCACAATGTACATGCTTCCATAAAAGGGTTGATTAGTGGTAGAAAAGCGCAACTAGGACGGACAA
Bmpr1b	ENSMUST00000029948	CGCGGTGGTGGTACGACATGAGGGAGAATGAGGTGTAATGTTGGGGGAGTATAAAGAACGGGCAGGAGCAAATAGAGTTGATAGAGGGAGAAAGCGCAACTAGGACGGACAA
Bmpr1b	ENSMUST00000029948	CGCGGTGGTGGTACGACATGAAGTTGAGGTGGGAGAGTATTTCTCTCTTCACTTATGGCCGGGTTGCTCCTAGGGAGAATGAGGTGTAATGTAGCGCAACTAGGACGGACAA
Bmpr1b	ENSMUST00000029948	CGCGGTGGTGGTACGACATGAAGTTGAGGTGGGAGAGTATTCCAGAAAAGGGGTAAAACATTCCCTCATTTATAGAGTTGATAGAGGGAGAAAGCGCAACTAGGACGGACAA
Bmpr1b	ENSMUST00000029948	CGCGGTGGTGGTACGACATGAGGGAGAATGAGGTGTAATGTCAGATGGATCTGTCTAGAGGCAATAAGGTTAGGGTTGATTAGTGGTAGAAAAGCGCAACTAGGACGGACAA
Bmpr1b	ENSMUST00000029948	CGCGGTGGTGGTACGACATGATAGAGTTGATAGAGGGAGAACCAATGGAGAAAACATTTTGACTTCCAGGAAGGGTTGATTAGTGGTAGAAAAGCGCAACTAGGACGGACAA
Brinp3	ENSMUST00000074622	CGCGGTGGTGGTACGACATGAAGGTTAGGTTGAGAATAGGAAAGATCATGTGGACCAGACTGGACTTGTATATGTGGAGGGATTGAAGGATAAGCGCAACTAGGACGGACAA
[truncated: 20,006 more rows]
